# Supplementary material for: Stereoselective synthesis of 2,3,4-highly substituted oxetanes by intramolecular C–C bond forming Michael addition
Source: Royal Society of Chemistry journal article supplement (doi:10.1039/c6cc06857j), 2016-01-01
Supplement: c6cc06857j1.pdf [file c6cc06857j1.pdf]

# **Stereoselective synthesis of 2,3,4-highly substituted oxetanes by intramolecular C–C bond forming Michael addition**

Guo-Ming Ho,<sup>[a],[b]</sup> and Yu-Jang Li\*<sup>[a]</sup>

<sup>[a]</sup> Department of Applied Chemistry, National Chiayi university, 300, Syuefu Road, Chiayi City  
600, Taiwan

<sup>[b]</sup> Genomics Research Center, Academia Sinica, 128, Section 2, Academia Road, Taipei 115,  
Taiwan

## **TABLE OF CONTENTS**

|                                                                                              |             |
|----------------------------------------------------------------------------------------------|-------------|
| <b>I. General Experimental.....</b>                                                          | <b>S2</b>   |
| <b>II. Experimental Procedures.....</b>                                                      | <b>S4</b>   |
| Table S1 Preparations of ketoesters and their corresponding vinylogous urethanes.....        | S4          |
| Table S2 Preparations of acetylenic esters and their corresponding vinylogous urethanes..... | S5          |
| General procedure for the synthesis of ketoesters.....                                       | S5          |
| General procedure for the synthesis of acetylenic esters.....                                | S8          |
| General procedure for the synthesis of vinylogous urethanes from ketoesters.....             | S13         |
| General procedure for the synthesis of vinylogous urethanes from acetylenic esters.....      | S16         |
| General procedure for the synthesis of 2,3,3,4-tetrasubstituted oxetanes.....                | S21         |
| General procedure for the Cope elimination reaction.....                                     | S31         |
| General procedure for the conjugate addition of primary amine.....                           | S43         |
| <b>III. References.....</b>                                                                  | <b>S45</b>  |
| <b>IV. NMR Spectra.....</b>                                                                  | <b>S46</b>  |
| <b>V. X-Ray Structure and Crystallographic Data.....</b>                                     | <b>S149</b> |

## I. General Experimental

**NMR Spectroscopy:**  $^1\text{H}$  and  $^{13}\text{C}$  NMR spectra were recorded on Varian Mercury 300 (300 MHz,  $^1\text{H}$ ; 75 MHz,  $^{13}\text{C}$ ), Bruker AVIII 500 (500 MHz,  $^1\text{H}$ ; 126 MHz,  $^{13}\text{C}$ ) or Bruker 600 (600 MHz,  $^1\text{H}$ ; 151 MHz,  $^{13}\text{C}$ ) MHz nuclear magnetic resonance spectrometers. Spectra are referenced relative to residual  $\text{CDCl}_3$  ( $\delta = 7.26$  ppm,  $^1\text{H}$ ; 77.00 ppm,  $^{13}\text{C}$ ) or  $\text{C}_6\text{D}_6$  ( $\delta = 7.15$  ppm,  $^1\text{H}$ ; 128.00 ppm,  $^{13}\text{C}$ ). Data are reported as follows: chemical shift (multiplicity [s = singlet, d = doublet, t = triplet, q = quartet, br = broad, m = mutiple], integration, coupling constant (Hz) and assignment.) ( $J$ ) refers to the observed coupling constant(s) in Hz. The chemical shift difference in Hz between the signals for protons A and B of an AB quartet is  $Du$ . As described in Silverstein, Bassler and Morrill's text, a four line two spin pattern was analyzed as shown in the figure below and by using the equation;  $(a-c)=[(Du)^2+JAB^2]^{0.5}$ . Letting  $(a-c) = x$  and rearranging the equation solves for  $Du=[(x)^2-JAB^2]^{0.5}$ . For those examples where multiples were recognized as the A and B protons of  $\text{AB}_m\text{x}$  pattern, the chemical shift is reported as the midpoint of the multiplet.

**Infrared Spectroscopy:** Infrared spectra were recorded using a Bruker ALPHA FT-IR spectrometer equipped with an ATR accessory. Total reflection spectra (specular and diffuse reflection) were collected in-situ in the range of  $4000\text{-}500\text{ cm}^{-1}$  at a resolution of  $4\text{ cm}^{-1}$  over 24 scans, and were converted into transmission by Bruker OPUS 6.5 software. The time measurement was of 18 s (24 scans) per spectrum. After each measurement the ATR plate was washed with ethanol and dried using tissue paper. Infrared frequencies are reported in reciprocal centimeters ( $\text{cm}^{-1}$ ).

**Mass Spectrometry:** Mass spectra were recorded on a VG-7035 mass spectrometer at an ionizing voltage of either 70 or 20 eV; alternatively, samples were analyzed by the Instrumental center of National Science Consul at National Chung Hsing University. Mass spectra are reported as  $m/z$  values for the parent peak  $\text{M}^+$  and /or the major fragments. The values in parentheses refer to the relative peak intensities.

**Chromatography:** Reaction progress was monitored by analytical thin-layer chromatography on Analtech 250nm hard layer silica gel 60 F-250 plates cut into  $1\text{ cm} \times 5\text{ cm}$  sections. Visualization was effected by ultraviolet light (254nm), followed by dipping the plate into the appropriate stain

and then charring on a hot plate. [15% (w/v) solvent of phosphoromolybdic acid and 95% ethanol (PMA)]. Flash chromatography was performed on silica gel 230-400 mesh, eluted with appropriate solvents.

**Reaction Setup:** Reactions requiring heating were immersed in thermostat-controlled silicon-oil baths. The low temperature baths were dry ice/acetone ( $-78\text{ }^{\circ}\text{C}$ ) and ice water ( $4\text{ }^{\circ}\text{C}$ ). Reactions, which maintained at low temperature for extended periods of time, were kept in Neslab thermostat-controlled Cryobath with stirrer. Reactions other than those in which water was present as a solvent, reagent or by-product were normally performed under a slight positive pressure of nitrogen in vessels, which had been flame-dried under a slow nitrogen flow and sealed with rubber septa. The nitrogen gas was dried by passing it through a drying tube filled with Drierite®. Additions of liquid to the vessels were made via syringe or cannula through septa. Solids were added through open septa. All reactions were stirred with Teflon-coated magnetic stir bars. Removal of solvents was normally accomplished using a Jasco rotary evaporator connected to a vacuum pump.

**Solvents and reagents:** The following solvents were distilled directly before use, under a slight positive pressure of nitrogen. Diethyl ether, tetrahydrofuran and benzene were distilled from sodium benzophenone ketyl. Dichloromethane and diisopropyl amine were distilled from calcium hydride prior to use. Reagents were purchased from the Aldrich, Fluka, and Acros chemical companies.

## II. Experimental Procedures

Secondary  $\gamma$ -allyloxy substituted vinylogous urethanes were prepared from two different sequential approaches. As depicted in **Table S1** and **S2**. Williamson ether synthesis of methyl 4-bromoketoester **S1** with alcohols **S2-6** provided ketoesters **K1-5** in 72%-83% yields, respectively (**Table S1**, entries 1-5). Subsequent condensed with pyrrolidine utilizing Dean-Stark apparatus to provide desired vinylogous urethanes **11b**, **11e**, **11g**, **11i** and **11j** in 98%-99% yields (**Table S1**, entries 1-5). Alternatively, an efficient one-pot reaction can directly convert propargylic alcohols **S7**, **S8**, **S9** and **S10** to corresponding acetylenic esters **E1-9** in 65%-83% yields, respectively (**Table S2**, entries 1-9). Following exposed to pyrrolidine to give desired vinylogous urethanes **11a**, **11c**, **11d**, **11f**, **11h**, **11k**, **11l**, **11m** and **11n** in 98%-99% yields (**Table S2**, entries 1-9).

**Table S1 | Preparations of ketoesters and their corresponding vinylogous urethanes.**

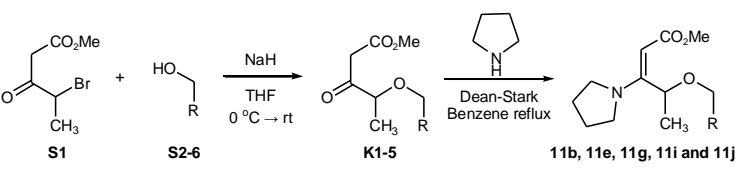

| Entry <sup>[a]</sup> | R                                                                 | Ester     | Yield <sup>[b]</sup> | VU         | Yield <sup>[c]</sup> |
|----------------------|-------------------------------------------------------------------|-----------|----------------------|------------|----------------------|
| 1                    | CH=CH <sub>2</sub>                                                | <b>K1</b> | 80%                  | <b>11b</b> | 98%                  |
| 2                    | C(Me)=CH <sub>2</sub>                                             | <b>K2</b> | 77%                  | <b>11e</b> | 99%                  |
| 3                    | ( <i>E</i> )-CH=CH(CH <sub>2</sub> ) <sub>2</sub> CH <sub>3</sub> | <b>K3</b> | 74%                  | <b>11g</b> | 98%                  |
| 4                    | ( <i>Z</i> )-CH=CH(CH <sub>2</sub> ) <sub>2</sub> CH <sub>3</sub> | <b>K4</b> | 72%                  | <b>11i</b> | 98%                  |
| 5                    | Ph                                                                | <b>K5</b> | 83%                  | <b>11j</b> | 98%                  |

[a] The ketoesters **K1-5** and **S1** were prepared according to literature procedure<sup>[1]</sup>. [b] Yields of isolated ketoesters **K1-5** were given after column chromatograph. [c] Pyrrolidine added to a solution of ketoester in benzene followed by heating to reflux for 30 minutes, and yields of VUs were given by directly removed solvent under *vacuo* without further purifications.



**Table S2 | Preparations of acetylenic esters and their corresponding vinylogous urethanes.**

| Entry <sup>[a]</sup> | R <sup>1</sup>                                  | R <sup>2</sup>                                                    | Ester     | Yield <sup>[b]</sup> | VU         | Yield <sup>[c]</sup> |
|----------------------|-------------------------------------------------|-------------------------------------------------------------------|-----------|----------------------|------------|----------------------|
| 1                    | CHMe <sub>2</sub>                               | CH=CH <sub>2</sub>                                                | <b>E1</b> | 76%                  | <b>11a</b> | 99%                  |
| 2                    | cC <sub>6</sub> H <sub>11</sub>                 | CH=CH <sub>2</sub>                                                | <b>E2</b> | 81%                  | <b>11c</b> | 99%                  |
| 3                    | CH <sub>2</sub> CHMe <sub>2</sub>               | CH=CH <sub>2</sub>                                                | <b>E3</b> | 74%                  | <b>11d</b> | 99%                  |
| 4                    | CHMe <sub>2</sub>                               | C(Me)=CH <sub>2</sub>                                             | <b>E4</b> | 76%                  | <b>11f</b> | 99%                  |
| 5                    | (CH <sub>2</sub> ) <sub>4</sub> CH <sub>3</sub> | ( <i>E</i> )-CH=CH(CH <sub>2</sub> ) <sub>2</sub> CH <sub>3</sub> | <b>E5</b> | 70%                  | <b>11h</b> | 99%                  |
| 6                    | CHMe <sub>2</sub>                               | Ph                                                                | <b>E6</b> | 82%                  | <b>11k</b> | 98%                  |
| 7                    | cC <sub>6</sub> H <sub>11</sub>                 | Ph                                                                | <b>E7</b> | 83%                  | <b>11l</b> | 99%                  |
| 8                    | CH <sub>2</sub> CHMe <sub>2</sub>               | Ph                                                                | <b>E8</b> | 77%                  | <b>11m</b> | 99%                  |
| 9                    | CHMe <sub>2</sub>                               | naphth                                                            | <b>E9</b> | 65%                  | <b>11n</b> | 98%                  |

[a] The acetylenic esters **E1-9**<sup>[2]</sup> and propargylic alcohols **S7**<sup>[3]</sup>, **S8**<sup>[4]</sup>, **S9**<sup>[3]</sup> as well as **S10**<sup>[5]</sup> were prepared according to literature procedures. [b] Yields of isolated acetylenic esters **E1-9** were given after column chromatograph. [c] Pyrrolidine added to a solution of acetylenic ester in *tert*-butanol followed by heating to reflux for 30 minutes, and yields of VUs were given by directly removed solvent under *vacuo* without further purifications.

### General procedure for the synthesis of ketoesters.

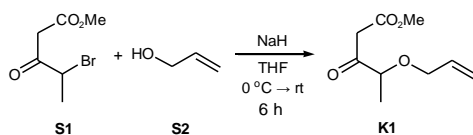

**Synthesis of methyl 4-(allyloxy)-3-oxopentanoate (K1).** Ketoesters were prepared by literature reported procedure<sup>[1]</sup>. To NaH (0.43 g, 60%, 10.6 mmol, pre-washed with *n*-hexane) in a flame-

dried 50 mL round-bottomed three-necked flask with THF (12 mL) at 0 °C was added dropwise a solution of methyl 4-bromo-3-oxopentanoate **S1** (1.0 g, 4.81 mmol, 1.0 equiv.) in THF (4 mL). The reaction mixture was stirred for 30 min at 0 °C, after which a solution of allyl alcohol **S2** (0.36 mL, 5.30 mmol, 1.1 equiv.) in THF (2 mL) was added dropwise into the reaction. The reaction mixture was allowed to warm to room temperature slowly, and stirred for additional 6 hours at ambient temperature. The reaction was quenched by the slow addition of water (20 mL), the reaction mixture was acidified with aqueous HCl (1 M) to pH 4.0, and then extracted with EtOAc (10 mL × 2). The combined organic layer was washed with brine, then dried over anhydrous sodium sulfate, and concentrated to give crude material. Purification by flash column chromatography (*n*-hexane/EtOAc, 10:1) afforded product **K1** as a pale-yellow oil in 80% yield (0.72 g).  $R_f = 0.46$  (SiO<sub>2</sub>, 4:1 *v/v*, *n*-hexane/EtOAc); **FT-IR** (neat)  $\nu$  3012, 2985, 2954, 2870, 1749, 1722, 1659, 1631, 1438, 1321, 1264, 1228, 1117, 997, 841, 741 cm<sup>-1</sup>; **<sup>1</sup>H NMR (300 MHz, CDCl<sub>3</sub>)**  $\delta$  5.89 (ddt,  $J = 17.2, 10.4, 5.6$  Hz, 1H, vinylic H), 5.29 (dd,  $J = 17.2, 1.6$  Hz, 1H, geminal-H), 5.21 (dd,  $J = 10.4, 1.6$  Hz, 1H, geminal-H), 4.02 (dd,  $J = 5.6, 4.2$  Hz, 2H, allylic H), 3.96 (q,  $J = 6.8$  Hz, 1H, methine-H), 3.73 (s, 3H, CO<sub>2</sub>Me), 3.64 (ABq,  $J = 16.2$  Hz, 1H, methylene-H), 3.56 (ABq,  $J = 16.2$  Hz, 1H, methylene-H), 1.33 (d,  $J = 6.8$  Hz, 3H, Me); **<sup>13</sup>C NMR (75 MHz, CDCl<sub>3</sub>)**  $\delta$  205.5 (C), 167.8 (C), 133.7 (CH), 117.7 (CH<sub>2</sub>), 80.2 (CH), 70.8 (CH<sub>2</sub>), 52.3 (CH<sub>3</sub>), 44.4 (CH<sub>2</sub>), 16.8 (CH<sub>3</sub>); **HRMS-EI** calcd for C<sub>9</sub>H<sub>14</sub>O<sub>4</sub>, 186.0892 found 186.0899.

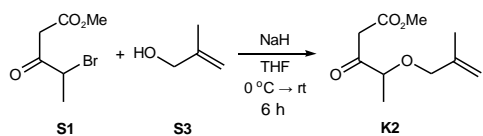

**Methyl 4-(2-methylallyloxy)-3-oxopentanoate (K2).** Prepared according to the general procedure with NaH (0.43 g, 60%, 10.6 mmol), methyl 4-bromo-3-oxopentanoate **S1** (1.0 g, 4.81 mmol, 1.0 equiv.) and methallyl alcohol **S3** (0.45 mL, 5.30 mmol, 1.1 equiv.) for 6 hours to give product **K2** as a pale-yellow oil in 77% yield (0.74 g).  $R_f = 0.47$  (SiO<sub>2</sub>, 4:1 *v/v*, *n*-hexane/EtOAc); **FT-IR** (neat)  $\nu$  3010, 2984, 2951, 1752, 1723, 1659, 1461, 1441, 1322, 1259, 1228, 1149, 1003, 902, 813 cm<sup>-1</sup>; **<sup>1</sup>H NMR (300 MHz, CDCl<sub>3</sub>)**  $\delta$  4.97 (s, 1H, geminal-H), 4.91 (s, 1H, geminal-H), 3.97 (q,  $J = 7.3$  Hz, 1H, methine-H), 3.90 (s, 2H, allylic H), 3.72 (s, 3H, CO<sub>2</sub>Me), 3.65 (ABq,  $J = 16.2$  Hz, 1H, methylene-H), 3.58 (ABq,  $J = 16.2$  Hz, 1H, methylene-H), 1.74 (s, 3H, vinylic Me),

1.33 (d,  $J = 7.3$  Hz, 3H, Me);  $^{13}\text{C}$  NMR (75 MHz,  $\text{CDCl}_3$ )  $\delta$  205.5 (C), 167.8 (C), 141.1 (C), 112.7 ( $\text{CH}_2$ ), 80.2 (CH), 73.7 ( $\text{CH}_2$ ), 52.3 ( $\text{CH}_3$ ), 44.4 ( $\text{CH}_2$ ), 19.5 ( $\text{CH}_3$ ), 16.7 ( $\text{CH}_3$ ); HRMS-EI calcd for  $\text{C}_{10}\text{H}_{16}\text{O}_4$ , 200.1049 found 200.1040.

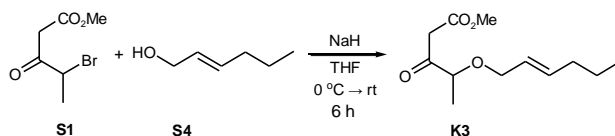

**Methyl 4-[(E)-hex-2-enyloxy]-3-oxopentanoate (K3).** Prepared according to the general procedure with NaH (0.43 g, 60%, 10.6 mmol), methyl 4-bromo-3-oxopentanoate **S1** (1.0 g, 4.81 mmol, 1.0 equiv.) and *trans*-2-hexen-1-ol **S4** (0.63 mL, 5.30 mmol, 1.1 equiv.) for 6 hours to give product **K3** as a pale-yellow oil in 74% yield (0.82 g).  $R_f = 0.51$  ( $\text{SiO}_2$ , 4:1 v/v, *n*-hexane/EtOAc); FT-IR (neat)  $\nu$  3010, 2958, 2934, 2872, 1749, 1722, 1659, 1632, 1438, 1320, 1263, 1226, 1146, 972, 814  $\text{cm}^{-1}$ ;  $^1\text{H}$  NMR (300 MHz,  $\text{CDCl}_3$ )  $\delta$  5.71 (dt,  $J = 14.4, 6.6$  Hz, 1H, vinylic H), 5.52 (dt,  $J = 14.4, 6.2$  Hz, 1H, vinylic H), 4.01–3.96 (m, 3H, allylic and methine-H), 3.73 (s, 3H,  $\text{CO}_2\text{Me}$ ), 3.64 (ABq,  $J = 16.2$  Hz, 1H, methylene-H), 3.56 (ABq,  $J = 16.2$  Hz, 1H, methylene-H), 2.03 (dd,  $J = 13.9, 6.2$  Hz, 2H, allylic H), 1.42–1.37 (m, 2H, homoallylic H), 1.33 (d,  $J = 6.8$  Hz, 3H, methine-Me), 0.90 (t,  $J = 7.3$  Hz, 3H, Me);  $^{13}\text{C}$  NMR (75 MHz,  $\text{CDCl}_3$ )  $\delta$  205.5 (C), 167.8 (C), 135.7 (CH), 125.4 (CH), 79.8 (CH), 70.8 ( $\text{CH}_2$ ), 52.2 ( $\text{CH}_3$ ), 44.4 ( $\text{CH}_2$ ), 34.3 ( $\text{CH}_2$ ), 22.1 ( $\text{CH}_2$ ), 16.8 ( $\text{CH}_3$ ), 13.7 ( $\text{CH}_3$ ); HRMS-EI calcd for  $\text{C}_{12}\text{H}_{20}\text{O}_4$ , 228.1362 found 228.1356.

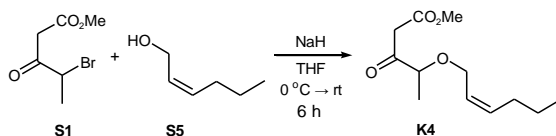

**Methyl 4-[(Z)-hex-2-enyloxy]-3-oxopentanoate (K4).** Prepared according to the general procedure with NaH (0.43 g, 60%, 10.6 mmol), methyl 4-bromo-3-oxopentanoate **S1** (1.0 g, 4.81 mmol, 1.0 equiv.) and *cis*-2-hexen-1-ol **S5** (0.63 mL, 5.30 mmol, 1.1 equiv.) for 6 hours to give product **K4** as a pale-yellow oil in 72% yield (0.79 g).  $R_f = 0.52$  ( $\text{SiO}_2$ , 4:1 v/v, *n*-hexane/EtOAc); FT-IR (neat)  $\nu$  3013, 2959, 2934, 2873, 1745, 1723, 1659, 1632, 1438, 1369, 1317, 1263, 1225, 1147, 1004, 813  $\text{cm}^{-1}$ ;  $^1\text{H}$  NMR (300 MHz,  $\text{CDCl}_3$ )  $\delta$  5.66–5.47 (m, 2H, vinylic H), 4.09–4.05 (m, 2H, allylic H), 3.97 (q,  $J = 6.8$  Hz, 1H, methine-H), 3.73 (s, 3H,  $\text{CO}_2\text{Me}$ ), 3.65 (ABq,  $J = 16.2$  Hz, 1H, methylene-H), 3.56 (ABq,  $J = 16.2$  Hz, 1H, methylene-H), 2.03 (dd,  $J = 14.3, 7.3$

Hz, 2H, allylic H), 1.42–1.38 (m, 2H, homoallylic H), 1.32 (d,  $J = 6.8$  Hz, 3H, methine-Me), 0.90 (t,  $J = 7.4$  Hz, 3H, Me);  $^{13}\text{C}$  NMR (75 MHz,  $\text{CDCl}_3$ )  $\delta$  205.5 (C), 167.8 (C), 134.4 (CH), 125.1 (CH), 80.0 (CH), 65.6 ( $\text{CH}_2$ ), 52.2 ( $\text{CH}_3$ ), 44.3 ( $\text{CH}_2$ ), 29.6 ( $\text{CH}_2$ ), 22.6 ( $\text{CH}_2$ ), 16.8 ( $\text{CH}_3$ ), 13.7 ( $\text{CH}_3$ ); HRMS-EI calcd for  $\text{C}_{12}\text{H}_{20}\text{O}_4$ , 228.1362 found 228.1357.

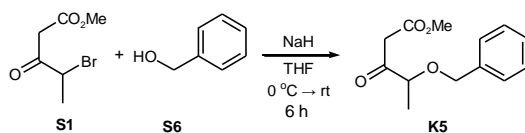

**Methyl 4-(benzyloxy)-3-oxopentanoate (K5).** Prepared according to the general procedure with NaH (0.43 g, 60%, 10.6 mmol), methyl 4-bromo-3-oxopentanoate **S1** (1.0 g, 4.81 mmol, 1.0 equiv.) and benzyl alcohol **S6** (0.55 mL, 5.30 mmol, 1.1 equiv.) for 6 hours to give product **K5** as a pale-yellow oil in 83% yield (0.94 g).  $R_f = 0.55$  ( $\text{SiO}_2$ , 4:1 v/v, *n*-hexane/EtOAc); FT-IR (neat)  $\nu$  2983, 2953, 1741, 1721, 1655, 1632, 1497, 1319, 1262, 1227, 1148, 1114, 1002, 740, 698  $\text{cm}^{-1}$ ;  $^1\text{H}$  NMR (300 MHz,  $\text{CDCl}_3$ )  $\delta$  7.38–7.28 (m, 5H, phenyl-H), 4.58 (ABq,  $J = 11.6$  Hz, 1H, benzylic H), 4.50 (ABq,  $J = 11.6$  Hz, 1H, benzylic H), 4.03 (q,  $J = 6.8$  Hz, 1H, methine-H), 3.70 (s, 3H,  $\text{CO}_2\text{Me}$ ), 3.66 (ABq,  $J = 16.2$  Hz, 1H, methylene-H), 3.58 (ABq,  $J = 16.2$  Hz, 1H, methylene-H), 1.37 (d,  $J = 6.8$  Hz, 3H, Me);  $^{13}\text{C}$  NMR (75 MHz,  $\text{CDCl}_3$ )  $\delta$  205.3 (C), 167.8 (C), 137.2 (C), 128.5 (CH  $\times$  2), 128.0 (CH  $\times$  2), 127.7 (CH), 80.2 (CH), 71.9 ( $\text{CH}_2$ ), 52.2 ( $\text{CH}_3$ ), 44.4 ( $\text{CH}_2$ ), 16.7 ( $\text{CH}_3$ ); HRMS-EI calcd for  $\text{C}_{13}\text{H}_{16}\text{O}_4$ , 236.1049 found 236.1043.

### General procedure for the synthesis of acetylenic esters

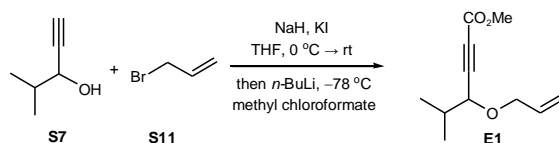

**Synthesis of methyl 4-(allyloxy)-5-methylhex-2-ynoate (E1).** Acetylenic esters were prepared by modified reported procedure<sup>[2]</sup>. To NaH (640 mg, 60%, 16.1 mmol, 1.5 equiv., pre-washed with *n*-hexane) in a 50 mL round-bottomed three-necked flask with THF (5 mL) at 0 °C was added dropwise a solution of 4-methylpent-1-yn-3-ol **S7**<sup>[3]</sup> (1.05 g, 10.7 mmol, 1.0 equiv.) in THF (15 mL). The reaction mixture was stirred for 30 minutes at 0 °C. Allyl bromide **S11** (1.02 mL, 11.8 mmol, 1.1 equiv) in THF (6 mL) was added dropwise into the reaction, followed by the addition of KI (1.77 g, 10.7 mmol, 1.0 equiv.). The reaction mixture was allowed to warm to

ambient temperature slowly and stirred for additional 6 hours. Upon TLC showed complete consumption of the starting material, the reaction was cooled to  $-78\text{ }^{\circ}\text{C}$  and added *n*-BuLi (1.6 M in *n*-hexane, 8.1 mL, 12.8 mmol, 1.2 equiv.) dropwise over a period of 30 minutes. The reaction mixture was allowed to stir for 1 hour at  $-78\text{ }^{\circ}\text{C}$ , and then the anion was quenched with methyl chloroformate (1.3 mL, 16.1 mmol, 1.5 equiv.). The reaction mixture was allowed to warm to ambient temperature, and stirred for 1 hour. Water was added and the reaction mixture extracted with diethyl ether (10 mL  $\times$  2). The combined organic layer was washed with brine, dried over anhydrous sodium sulfate, and concentrated to give crude material. Purification by flash column chromatography (*n*-hexane/ethyl acetate, 10:1) afforded product **E1** as a colorless oil in 76% yield (1.60 g).  $R_f = 0.46$  (SiO<sub>2</sub>, 4:1 *v/v*, *n*-hexane/EtOAc); **FT-IR** (neat)  $\nu$  3010, 2962, 2934, 2875, 2233, 1754, 1720, 1599, 1585, 1468, 1434, 1249, 1129, 1071, 1000, 930, 751  $\text{cm}^{-1}$ ; **<sup>1</sup>H NMR (300 MHz, CDCl<sub>3</sub>)**  $\delta$  5.89 (ddt,  $J = 17.3, 10.3, 5.1$  Hz, 1H, vinylic H), 5.31 (dd,  $J = 17.3, 1.6$  Hz, 1H, geminal-H), 5.20 (dd,  $J = 10.3, 1.6$  Hz, 1H, geminal-H), 4.26 (dd,  $J = 12.6, 5.1$  Hz, 1H, allylic H), 3.97 (d,  $J = 5.8$  Hz, 1H, propargylic H), 3.96–3.90 (m, 1H, allylic H), 3.78 (s, 3H, CO<sub>2</sub>Me), 2.04–1.98 (m, 1H, methine-H), 1.03 (d,  $J = 6.5$  Hz, 3H, Me), 1.01 (d,  $J = 6.5$  Hz, 3H, Me); **<sup>13</sup>C NMR (75 MHz, CDCl<sub>3</sub>)**  $\delta$  153.7 (C), 133.9 (CH), 117.6 (CH<sub>2</sub>), 85.9 (C), 77.8 (C), 73.9 (CH), 70.3 (CH<sub>2</sub>), 52.7 (CH<sub>3</sub>), 32.9 (CH), 18.4 (CH<sub>3</sub>), 17.8 (CH<sub>3</sub>); **HRMS-EI** calcd for C<sub>11</sub>H<sub>16</sub>O<sub>3</sub>, 196.1099 found 196.1106.

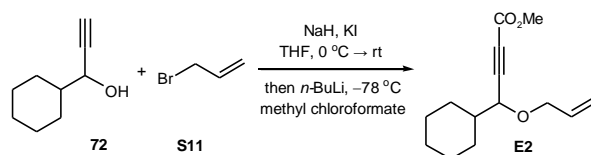

**Methyl 4-(allyloxy)-4-cyclohexylbut-2-ynoate (E2).** Prepared according to the general procedure with NaH (610 mg, 60%, 15.31 mmol), 1-cyclohexyl-prop-2-yn-1-ol **72**<sup>[4]</sup> (1.41 g, 10.2 mmol), KI (1.69 g, 10.20 mmol), allyl bromide **S11** (0.97 mL, 11.2 mmol), *n*-BuLi (7.7 mL, 12.2 mmol) and methyl chloroformate (1.2 mL, 15.3 mmol) to provide product **E2** as a pale-yellow oil in 81% yield (1.95 g).  $R_f = 0.47$  (SiO<sub>2</sub>, 4:1 *v/v*, *n*-hexane/EtOAc); **FT-IR** (neat)  $\nu$  3012, 2932, 2856, 2234, 1721, 1450, 1351, 1333, 1251, 1174, 1071, 980, 821, 750, 737  $\text{cm}^{-1}$ ; **<sup>1</sup>H NMR (300 MHz, CDCl<sub>3</sub>)**  $\delta$  5.88 (ddt,  $J = 17.3, 10.3, 5.1$  Hz, 1H, vinylic H), 5.30 (dd,  $J = 17.3, 1.6$  Hz, 1H, geminal-H), 5.20 (dd,  $J = 10.3, 1.6$  Hz, 1H, geminal-H), 4.25 (dd,  $J = 12.6, 5.1$  Hz, 1H, allylic H), 3.96 (d,  $J = 6.2$  Hz, 1H, propargylic H), 3.88–3.83 (m, 1H, allylic H), 3.78 (s, 3H,

CO<sub>2</sub>Me), 1.82–1.76 (m, 2H, cyclohexyl-H), 1.80–1.60 (m, 5H, cyclohexyl-H), 1.38–1.12 (m, 4H, cyclohexyl-H); <sup>13</sup>C NMR (75 MHz, CDCl<sub>3</sub>) δ 153.8 (C), 133.9 (CH), 117.8 (CH<sub>2</sub>), 86.1 (C), 77.8 (C), 73.3 (CH), 70.3 (CH<sub>2</sub>), 52.7 (CH<sub>3</sub>), 42.3 (CH), 28.7 (CH<sub>2</sub>), 28.4 (CH<sub>2</sub>), 26.2 (CH<sub>2</sub>), 25.8 (CH<sub>2</sub>), 25.7 (CH<sub>2</sub>); HRMS-EI calcd for C<sub>14</sub>H<sub>20</sub>O<sub>3</sub>, 236.1412 found 236.1406.

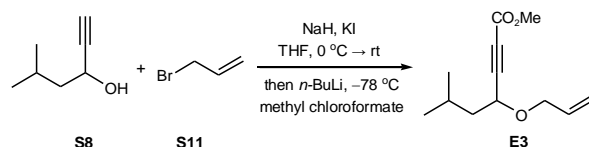

**Methyl 4-(allyloxy)-6-methylhept-2-ynoate (E3).** Prepared according to the general procedure with NaH (610 mg, 60%, 15.3 mmol), 5-methyl-hex-1-yn-3-ol **S8**<sup>[3]</sup> (1.14 g, 10.20 mmol), KI (1.69 g, 10.2 mmol), allyl bromide **S11** (0.97 mL, 11.2 mmol), *n*-BuLi (7.7 mL, 12.2 mmol) and methyl chloroformate (1.2 mL, 15.3 mmol) to provide product **E3** as a colorless oil in 74% yield (1.58 g). *R<sub>f</sub>* = 0.50 (SiO<sub>2</sub>, 4:1 *v/v*, *n*-hexane/EtOAc); FT-IR (neat)  $\nu$  3011, 2958, 2871, 2234, 1764, 1720, 1599, 1585, 1468, 1434, 1240, 1128, 1083, 1019, 999, 933, 751 cm<sup>-1</sup>; <sup>1</sup>H NMR (300 MHz, CDCl<sub>3</sub>) δ 5.89 (ddt, *J* = 17.2, 10.3, 6.4 Hz, 1H, vinylic H), 5.31 (dd, *J* = 17.2, 1.5 Hz, 1H, geminal-H), 5.19 (dd, *J* = 10.3, 1.5 Hz, 1H, geminal-H), 4.27–4.20 (m, 2H, allylic and propargylic H), 3.94 (dd, *J* = 12.6, 6.4 Hz, 1H, allylic H), 3.76 (s, 3H, CO<sub>2</sub>Me), 1.87–1.83 (m, 1H, methine-H), 1.72 (ddd, *J* = 14.5, 8.0, 6.7 Hz, 1H, methylene-H), 1.57 (ddd, *J* = 14.5, 6.7, 6.1 Hz, 1H, methylene-H), 0.90 (d, *J* = 6.7 Hz, 6H, Me); <sup>13</sup>C NMR (75 MHz, CDCl<sub>3</sub>) δ 153.6 (C), 133.7 (CH), 117.8 (CH<sub>2</sub>), 86.8 (C), 77.0 (C), 70.0 (CH), 66.8 (CH<sub>2</sub>), 52.7 (CH<sub>3</sub>), 43.7 (CH<sub>2</sub>), 24.4 (CH), 22.5 (CH<sub>3</sub>), 22.2 (CH<sub>3</sub>); HRMS-EI calcd for C<sub>12</sub>H<sub>18</sub>O<sub>3</sub>, 210.1256 found 210.1251.

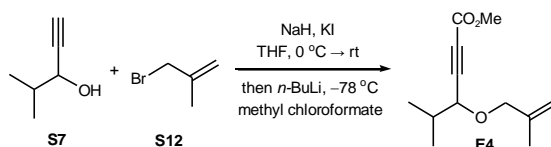

**Methyl 4-(2-methylallyloxy)-5-methylhex-2-ynoate (E4).** Prepared according to the general procedure with NaH (640 g, 60%, 16.1 mmol), 4-methyl-pent-1-yn-3-ol **S7** (1.05 g, 10.7 mmol), KI (1.77 g, 10.7 mmol), methallyl bromide **S12** (1.19 mL, 11.8 mmol), *n*-BuLi (8.1 mL, 12.8 mmol) and methyl chloroformate (1.3 mL, 16.1 mmol) to provide product **E4** as a colorless oil in 76% yield (1.71 g). *R<sub>f</sub>* = 0.46 (SiO<sub>2</sub>, 4:1 *v/v*, *n*-hexane/EtOAc); FT-IR (neat)  $\nu$  3012, 2962, 2934, 2875, 2233, 1754, 1720, 1599, 1585, 1468, 1434, 1249, 1129, 1071, 1000, 930, 751 cm<sup>-1</sup>; <sup>1</sup>H

**NMR (300 MHz, CDCl<sub>3</sub>)**  $\delta$  4.99 (s, 1H, geminal-H), 4.91 (s, 1H, geminal-H), 4.13 (ABq,  $J = 11.8$  Hz, 1H, allylic H), 3.93 (d,  $J = 5.9$  Hz, 1H, propargylic H), 3.89 (ABq,  $J = 11.8$  Hz, 1H, allylic H), 3.78 (s, 3H, CO<sub>2</sub>Me), 2.05-1.98 (m, 1H, methine-H), 1.74 (s, 3H, vinylic Me), 1.04 (d,  $J = 6.5$  Hz, 3H, Me), 1.02 (d,  $J = 6.5$  Hz, 3H, Me); **<sup>13</sup>C NMR (75 MHz, CDCl<sub>3</sub>)**  $\delta$  153.8 (C), 141.4 (C), 113.0 (CH<sub>2</sub>), 86.0 (C), 77.7 (C), 73.7 (CH), 73.2 (CH<sub>2</sub>), 52.7 (CH<sub>3</sub>), 32.9 (CH), 19.6 (CH<sub>3</sub>), 18.3 (CH<sub>3</sub>), 17.9 (CH<sub>3</sub>); **HRMS-EI** calcd for C<sub>12</sub>H<sub>18</sub>O<sub>3</sub>, 210.1256 found 210.1247.

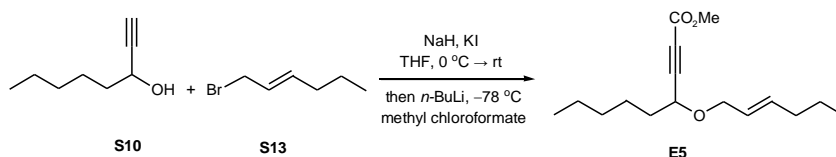

**Methyl 4-((E)-hex-2-enyloxy)non-2-ynoate (E5).** Prepared according to the general procedure with NaH (610 mg, 60%, 15.4 mmol), oct-1-yn-3-ol **S10**<sup>[51]</sup> (1.30 g, 10.3 mmol), KI (1.69 g, 10.3 mmol), allyl bromide **S13** (1.82 g, 11.3 mmol), *n*-BuLi (7.7 mL, 12.3 mmol) and methyl chloroformate (1.2 mL, 15.4 mmol) to provide product **E5** as a colorless oil in 70% yield (1.92 g).  $R_f = 0.45$  (SiO<sub>2</sub>, 4:1 v/v, *n*-hexane/EtOAc); **FT-IR** (neat)  $\nu$  3010, 2957, 2931, 2863, 2233, 1754, 1721, 1599, 1585, 1462, 1451, 1247, 1097, 1069, 972, 751 cm<sup>-1</sup>; **<sup>1</sup>H NMR (300 MHz, CDCl<sub>3</sub>)**  $\delta$  5.73 (dt,  $J = 15.2, 6.7$  Hz, 1H, geminal-H), 5.51 (dt,  $J = 15.2, 6.7$  Hz, 1H, geminal-H), 4.23–4.18 (m, 1H, allylic H), 4.16 (t,  $J = 6.6$  Hz, 1H, propargylic H), 3.90 (dd,  $J = 11.6, 6.7$  Hz, 1H, allylic H), 3.78 (s, 3H, CO<sub>2</sub>Me), 2.02 (q,  $J = 6.7$  Hz, 2H, allylic H), 1.80–1.74 (m, 2H, homopropargylic H), 1.46–1.22 (m, 8H, pentyl and homoallylic H), 1.91–1.85 (m, 6H, terminal-Me); **<sup>13</sup>C NMR (75 MHz, CDCl<sub>3</sub>)**  $\delta$  153.7 (C), 135.7 (CH), 125.4 (CH), 87.0 (C), 76.9 (C), 69.9 (CH), 67.8 (CH<sub>2</sub>), 52.6 (CH<sub>3</sub>), 34.8 (CH<sub>2</sub>), 34.3 (CH<sub>2</sub>), 31.3 (CH<sub>2</sub>), 24.7 (CH<sub>2</sub>), 22.4 (CH<sub>2</sub>), 22.0 (CH<sub>2</sub>), 13.9 (CH<sub>3</sub>), 13.6 (CH<sub>3</sub>); **HRMS-EI** calcd for C<sub>16</sub>H<sub>26</sub>O<sub>3</sub>, 266.1882 found 266.1889.

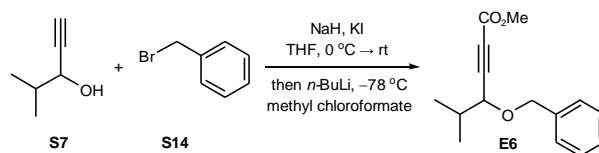

**Methyl 4-(benzyloxy)-5-methylhex-2-ynoate (E6).** Prepared according to the general procedure with NaH (670 mg, 60%, 16.8 mmol), 4-methyl-pent-1-yn-3-ol **S7** (1.10 g, 11.2 mmol), KI (1.85 g, 11.2 mmol), benzyl bromide **S14** (1.5 mL, 12.3 mmol), *n*-BuLi (8.5 mL, 13.4 mmol) and methyl chloroformate (1.3 mL, 16.8 mmol) to provide product **E6** as a pale-yellow oil in 82%

yield (2.27 g).  $R_f = 0.53$  (SiO<sub>2</sub>, 4:1 v/v, *n*-hexane/EtOAc); **FT-IR** (neat)  $\nu$  2962, 2874, 2234, 1754, 1720, 1599, 1586, 1465, 1452, 1440, 1383, 1349, 1250, 1088, 1069, 750, 699 cm<sup>-1</sup>; **<sup>1</sup>H NMR (300 MHz, CDCl<sub>3</sub>)**  $\delta$  7.38–7.28 (m, 5H, phenyl-H), 4.83 (ABq,  $J = 11.8$  Hz, 1H, benzylic H), 4.50 (ABq,  $J = 11.8$  Hz, 1H, benzylic H), 3.97 (d,  $J = 5.9$  Hz, 1H, propargylic H), 3.80 (s, 3H, CO<sub>2</sub>Me), 2.06–2.02 (m, 1H, methine-H), 1.05 (d,  $J = 7.0$  Hz, 3H, Me), 1.03 (d,  $J = 7.0$  Hz, 3H, Me); **<sup>13</sup>C NMR (75 MHz, CDCl<sub>3</sub>)**  $\delta$  153.7 (C), 137.4 (C), 128.3 (CH  $\times$  2), 127.9 (CH  $\times$  2), 127.7 (CH), 85.8 (C), 78.0 (C), 73.8 (CH), 71.1 (CH<sub>2</sub>), 52.7 (CH<sub>3</sub>), 32.9 (CH), 18.3 (CH<sub>3</sub>), 17.9 (CH<sub>3</sub>); **HRMS-EI** calcd for C<sub>15</sub>H<sub>18</sub>O<sub>3</sub>, 246.1256 found 246.1250.

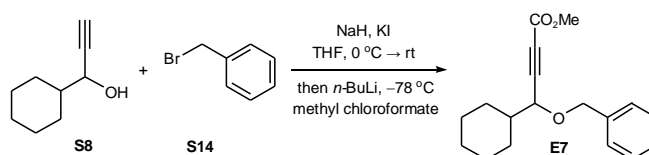

**Methyl 4-(benzyloxy)-4-cyclohexylbut-2-ynoate (E7).** Prepared according to the general procedure with NaH (610 mg, 60%, 15.3 mmol), 1-cyclohexyl-prop-2-yn-1-ol **S8** (1.41 g, 10.2 mmol), KI (1.70 g, 10.2 mmol), benzyl bromide **S14** (1.34 mL, 11.2 mmol), *n*-BuLi (7.7 mL, 12.2 mmol) and methyl chloroformate (1.18 mL, 15.3 mmol) to provide product **E7** as a pale-yellow oil in 83% yield (2.42 g).  $R_f = 0.51$  (SiO<sub>2</sub>, 4:1 v/v, *n*-hexane/EtOAc); **FT-IR** (neat)  $\nu$  2929, 2854, 2232, 1718, 1451, 1435, 1249, 1103, 1089, 1071, 750, 698 cm<sup>-1</sup>; **<sup>1</sup>H NMR (300 MHz, CDCl<sub>3</sub>)**  $\delta$  7.37–7.27 (m, 5H, phenyl-H), 4.81 (ABq,  $J = 11.8$  Hz, 1H, benzylic H), 4.48 (ABq,  $J = 11.8$  Hz, 1H, benzylic H), 3.96 (d,  $J = 6.3$  Hz, 1H, propargylic H), 3.80 (s, 3H, CO<sub>2</sub>Me), 1.87–1.86 (m, 2H, cyclohexyl-H), 1.73–1.67 (m, 3H, cyclohexyl-H), 1.25–1.10 (m, 6H, cyclohexyl-H); **<sup>13</sup>C NMR (75 MHz, CDCl<sub>3</sub>)**  $\delta$  153.7 (C), 137.3 (C), 128.3 (CH  $\times$  2), 127.9 (CH  $\times$  2), 127.7 (CH), 86.0 (C), 78.1 (C), 73.1 (CH), 71.1 (CH<sub>2</sub>), 52.7 (CH<sub>3</sub>), 42.3 (CH), 28.8 (CH<sub>2</sub>), 28.5 (CH<sub>2</sub>), 26.2 (CH<sub>2</sub>), 25.7 (CH<sub>2</sub>  $\times$  2); **HRMS-EI** calcd for C<sub>18</sub>H<sub>22</sub>O<sub>3</sub>, 286.1569 found 286.1574.

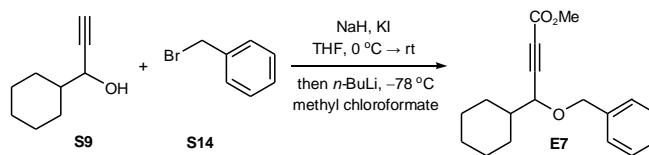

**Methyl 4-(benzyloxy)-6-methylhept-2-ynoate (E8).** Prepared according to the general procedure with NaH (610 g, 60%, 15.31 mmol), 5-methyl-hex-1-yn-3-ol **S9** (1.14 g, 10.2 mmol),



KI (1.69 g, 10.2 mmol), benzyl bromide **S14** (1.34 mL, 11.2 mmol), *n*-BuLi (7.7 mL, 12.2 mmol) and methyl chloroformate (1.18 mL, 15.3 mmol) to provide product **E8** as a pale-yellow oil in 77% yield (2.04 g).  $R_f = 0.51$  (SiO<sub>2</sub>, 4:1 *v/v*, *n*-hexane/EtOAc); **FT-IR** (neat)  $\nu$  2958, 2871, 2234, 1754, 1738, 1721, 1599, 1585, 1467, 1441, 1383, 1329, 1250, 1087, 1072, 1025, 749, 698 cm<sup>-1</sup>; **<sup>1</sup>H NMR (300 MHz, CDCl<sub>3</sub>)**  $\delta$  7.39–7.26 (m, 5H, phenyl-H), 4.81 (ABq,  $J = 11.6$  Hz, 1H, benzylic H), 4.49 (ABq,  $J = 11.6$  Hz, 1H, benzylic H), 4.23 (dd,  $J = 8.0, 6.1$  Hz, 1H, propargylic H), 3.80 (s, 3H, CO<sub>2</sub>Me), 1.88–1.83 (m, 1H, methine-H), 1.72 (ddd,  $J = 14.5, 8.0, 6.7$  Hz, 1H, methylene-H), 1.59–1.55 (m, 1H, methylene-H), 0.91 (d,  $J = 6.5$  Hz, 3H, Me), 0.86 (d,  $J = 6.5$  Hz, 3H, Me); **<sup>13</sup>C NMR (75 MHz, CDCl<sub>3</sub>)**  $\delta$  153.8 (C), 137.3 (C), 128.4 (CH  $\times$  2), 128.0 (CH  $\times$  2), 127.9 (CH), 86.9 (C), 77.0 (C), 71.1 (CH), 66.7 (CH<sub>2</sub>), 52.8 (CH<sub>3</sub>), 43.8 (CH<sub>2</sub>), 24.4 (CH), 22.6 (CH<sub>3</sub>), 21.9 (CH<sub>3</sub>); **HRMS-EI** calcd for C<sub>16</sub>H<sub>20</sub>O<sub>3</sub>, 260.1412 found 260.1421.

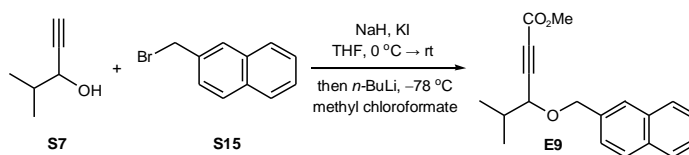

**Methyl 4-[(naphthalen-3-yl)methoxy]-5-methylhex-2-ynoate (E9).** Prepared according to the general procedure with NaH (670 mg, 60%, 16.8 mmol), 4-methyl-pent-1-yn-3-ol **S7** (1.10 g, 11.2 mmol), KI (1.85 g, 11.2 mmol), 2-bromomethyl-naphthalene **S15** (2.70 g, 12.3 mmol), *n*-BuLi (8.5 mL, 13.4 mmol) and methyl chloroformate (1.3 mL, 16.8 mmol) to provide product **E9** as a pale-yellow oil in 65% yield (2.16 g).  $R_f = 0.55$  (SiO<sub>2</sub>, 4:1 *v/v*, *n*-hexane/EtOAc); **FT-IR** (CHCl<sub>3</sub>)  $\nu$  2960, 2932, 2873, 2232, 1754, 1720, 1600, 1585, 1468, 1441, 1251, 1071, 949, 856, 817, 750 cm<sup>-1</sup>; **<sup>1</sup>H NMR (300 MHz, CDCl<sub>3</sub>)**  $\delta$  7.85–7.66 (m, 4H, naphthalene-H), 7.49–7.42 (m, 3H, naphthalene-H), 4.97 (ABq,  $J = 12.0$  Hz, 1H, benzylic H), 4.67 (ABq,  $J = 12.0$  Hz, 1H, O-benzylic H), 3.99 (d,  $J = 6.0$  Hz, 1H, propargylic H), 3.80 (s, 3H, CO<sub>2</sub>Me), 2.06–2.02 (m, 1H, methine-H), 1.05 (d,  $J = 6.6$  Hz, 3H, Me), 1.03 (d,  $J = 6.6$  Hz, 3H, Me); **<sup>13</sup>C NMR (75 MHz, CDCl<sub>3</sub>)**  $\delta$  153.7 (C), 134.7 (C), 133.1 (C), 133.0 (C), 128.2 (CH), 127.8 (CH), 127.6 (CH), 126.9 (CH), 126.1 (CH), 125.9 (CH), 125.8 (CH), 85.8 (C), 78.0 (C), 73.7 (CH), 71.3 (CH<sub>2</sub>), 52.7 (CH<sub>3</sub>), 32.9 (CH), 18.3 (CH<sub>3</sub>), 17.9 (CH<sub>3</sub>); **HRMS-EI** calcd for C<sub>19</sub>H<sub>20</sub>O<sub>3</sub>, 296.1412 found 296.1407.

**General procedure for the synthesis of vinylogous urethanes from ketoesters**

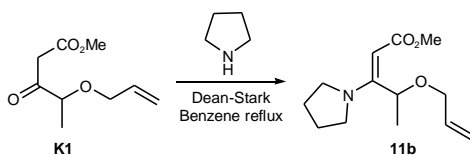

**Synthesis of (*E*)-methyl 4-(allyloxy)-3-(pyrrolidin-1-yl)pent-2-enoate (**11b**).** To ketoester **K1** (0.30 g, 1.61 mmol, 1.0 equiv.) in 10 mL round-bottom flask was added benzene (4 mL) and pyrrolidine (0.16 mL, 1.94 mmol, 1.2 equiv.), warmed to reflux under Dean-Stark apparatus to remove water. After 30 minutes of stirring, the solvent was removed under *vacuo* to give **11b** as a brown oil in 98% yield (0.38 g) and then used in the next reaction without further purifications. **FT-IR** (neat)  $\nu$  2975, 2946, 2870, 1681, 1565, 1445, 1421, 1394, 1343, 1185, 1138, 1099, 1076, 924, 794  $\text{cm}^{-1}$ ;  **$^1\text{H}$  NMR (300 MHz,  $\text{CDCl}_3$ )**  $\delta$  6.06 (q,  $J = 6.9$  Hz, 1H, methine-H), 5.89 (ddt,  $J = 17.2, 10.5, 5.6$  Hz, 1H, vinylic H), 5.23 (dd,  $J = 17.2, 1.7$  Hz, 1H, geminal-H), 5.21 (dd,  $J = 10.5, 1.7$  Hz, 1H, geminal-H), 4.45 (s, 1H,  $\alpha$ -vinylic H), 3.90 (ddt,  $J = 5.6, 3.4, 1.3$  Hz, 2H, allylic H), 3.59 (s, 3H,  $\text{CO}_2\text{Me}$ ), 3.42–3.18 (br, 4H, pyrrolidine-H), 1.85–1.78 (m, 4H, pyrrolidine-H), 1.42 (d,  $J = 6.9$  Hz, 3H, Me);  **$^{13}\text{C}$  NMR (75 MHz,  $\text{CDCl}_3$ )**  $\delta$  168.7 (C), 162.3 (C), 134.6 (CH), 116.7 ( $\text{CH}_2$ ), 84.2 (CH), 70.9 (CH), 70.0 ( $\text{CH}_2$ ), 50.0 ( $\text{CH}_3$ ), 49.2 ( $\text{CH}_2 \times 2$ ), 25.1 ( $\text{CH}_2 \times 2$ ), 19.2 ( $\text{CH}_3$ ); **HRMS-EI** calcd for  $\text{C}_{13}\text{H}_{21}\text{NO}_3$ , 239.1521 found 239.1525.

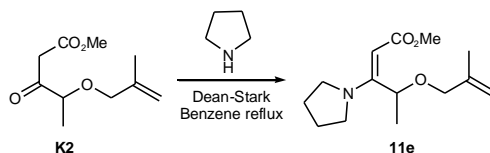

**(*E*)-methyl 4-(2-methylallyloxy)-3-(pyrrolidin-1-yl)pent-2-enoate (**11e**).** Prepared according to the general procedure with ketoester **K2** (0.32 g, 1.61 mmol) and pyrrolidine (0.16 mL, 1.94 mmol) to give product **11e** as a brown oil in 99% yield (0.40 g). **FT-IR** (neat)  $\nu$  2974, 2944, 2871, 1680, 1565, 1444, 1422, 1390, 1343, 1314, 1185, 1136, 1078, 900, 794  $\text{cm}^{-1}$ ;  **$^1\text{H}$  NMR (300 MHz,  $\text{CDCl}_3$ )**  $\delta$  6.05 (q,  $J = 6.9$  Hz, 1H, methine-H), 4.94 (s, 1H, geminal-H), 4.84 (s, 1H, geminal-H), 4.45 (s, 1H,  $\alpha$ -vinylic H), 3.80 (s, 2H, allylic H), 3.59 (s, 3H,  $\text{CO}_2\text{Me}$ ), 3.42–3.18 (br, 4H, pyrrolidine-H), 1.90–1.85 (m, 4H, pyrrolidine-H), 1.71 (s, 3H, vinylic Me), 1.43 (d,  $J = 6.9$  Hz, 3H, Me);  **$^{13}\text{C}$  NMR (75 MHz,  $\text{CDCl}_3$ )**  $\delta$  168.7 (C), 162.3 (C), 142.2 (C), 111.6 ( $\text{CH}_2$ ), 84.2 (CH), 72.9 (CH), 70.9 ( $\text{CH}_2$ ), 50.0 ( $\text{CH}_3$ ), 49.1 ( $\text{CH}_2 \times 2$ ), 25.1 ( $\text{CH}_2 \times 2$ ), 19.7 ( $\text{CH}_3$ ), 19.1 ( $\text{CH}_3$ ); **HRMS-EI** calcd for  $\text{C}_{14}\text{H}_{23}\text{NO}_3$ , 253.1678 found 253.1681.

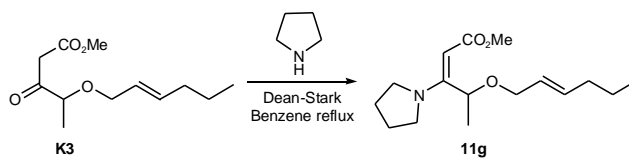

**(2E)-methyl 4-((E)-hex-2-enyloxy)-3-(pyrrolidin-1-yl)pent-2-enoate (11g).** Prepared according to the general procedure with ketoester **K3** (0.37 g, 1.61 mmol) and pyrrolidine (0.16 mL, 1.94 mmol) to give product **11g** as a brown oil in 98% yield (0.45 g). **FT-IR** (neat)  $\nu$  2975, 2946, 2871, 1681, 1565, 1445, 1421, 1394, 1343, 1138, 1099, 1076, 924, 794  $\text{cm}^{-1}$ ;  **$^1\text{H}$  NMR (300 MHz,  $\text{CDCl}_3$ )**  $\delta$  6.04 (q,  $J = 6.9$  Hz, 1H, methine-H), 5.68 (dt,  $J = 14.4, 6.6$  Hz, 1H, vinylic H), 5.52 (dt,  $J = 14.4, 6.2$  Hz, 1H, vinylic H), 4.45 (s, 1H,  $\alpha$ -vinylic H), 3.84 (t,  $J = 5.6$  Hz, 2H, allylic H), 3.60 (s, 3H,  $\text{CO}_2\text{Me}$ ), 3.42–3.18 (br, 4H, pyrrolidine-H), 2.03–1.99 (m, 2H, allylic H), 1.91–1.83 (m, 4H, pyrrolidine-H), 1.41 (d,  $J = 6.9$  Hz, 3H, Me), 1.32–1.28 (m, 2H, homoallylic H), 0.88 (t,  $J = 7.3$  Hz, 3H, terminal-Me);  **$^{13}\text{C}$  NMR (75 MHz,  $\text{CDCl}_3$ )**  $\delta$  168.6 (C), 162.6 (C), 134.6 (CH), 126.2 (CH), 84.1 (CH), 70.8 (CH), 70.0 ( $\text{CH}_2$ ), 50.0 ( $\text{CH}_3$ ), 49.2 ( $\text{CH}_2 \times 2$ ), 34.4 ( $\text{CH}_2$ ), 26.0 ( $\text{CH}_2 \times 2$ ), 22.1 ( $\text{CH}_2$ ), 19.2 ( $\text{CH}_3$ ), 13.7 ( $\text{CH}_3$ ); **HRMS-EI** calcd for  $\text{C}_{16}\text{H}_{27}\text{NO}_3$ , 281.1991 found 281.1985.

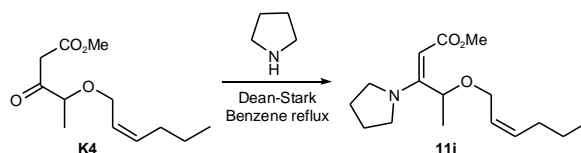

**(2E)-methyl 4-((Z)-hex-2-enyloxy)-3-(pyrrolidin-1-yl)pent-2-enoate (11i).** Prepared according to the general procedure with ketoester **K4** (0.37 g, 1.61 mmol) and pyrrolidine (0.16 mL, 1.94 mmol) to give product **11i** as a brown oil in 98% yield (0.45 g). **FT-IR** (neat)  $\nu$  2960, 2870, 1732, 1682, 1566, 1446, 1421, 1392, 1343, 1315, 1185, 1138, 1099, 1077, 794  $\text{cm}^{-1}$ ;  **$^1\text{H}$  NMR (300 MHz,  $\text{CDCl}_3$ )**  $\delta$  5.97 (q,  $J = 6.9$  Hz, 1H, methine-H), 5.46–5.43 (m, 2H, vinylic H), 4.39 (s, 1H,  $\alpha$ -vinylic H), 3.92–3.89 (m, 2H, allylic H), 3.52 (s, 3H,  $\text{CO}_2\text{Me}$ ), 3.42–3.18 (br, 4H, pyrrolidine-H), 2.01–1.97 (m, 2H, allylic H), 1.82–1.75 (m, 4H, pyrrolidine-H), 1.33 (d,  $J = 6.9$  Hz, 3H, Me), 1.31–1.25 (m, 2H, homoallylic H), 0.79 (t,  $J = 7.3$  Hz, 3H, terminal-Me);  **$^{13}\text{C}$  NMR (75 MHz,  $\text{CDCl}_3$ )**  $\delta$  168.4 (C), 162.3 (C), 133.0 (CH), 125.8 (CH), 84.1 (CH), 70.8 (CH), 64.5 ( $\text{CH}_2$ ), 49.8 ( $\text{CH}_3$ ), 48.9 ( $\text{CH}_2 \times 2$ ), 29.3 ( $\text{CH}_2$ ), 24.9 ( $\text{CH}_2 \times 2$ ), 22.4 ( $\text{CH}_2$ ), 19.0 ( $\text{CH}_3$ ), 13.5 ( $\text{CH}_3$ ); **HRMS-EI** calcd for  $\text{C}_{16}\text{H}_{27}\text{NO}_3$ , 281.1991 found 281.1983.

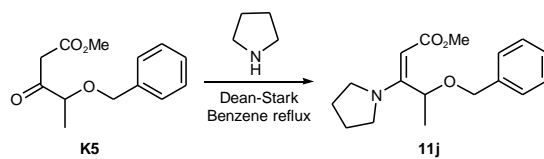

**(E)-methyl 4-(benzyloxy)-3-(pyrrolidin-1-yl)pent-2-enoate (11j).** Prepared according to the general procedure with ketoester **K5** (0.38 g, 1.61 mmol) and pyrrolidine (0.16 mL, 1.94 mmol) to give product **11j** as a brown oil in 98% yield (0.46 g). **FT-IR** (neat)  $\nu$  2977, 2946, 2873, 1717, 1681, 1635, 1565, 1455, 1267, 1139, 1101, 1075, 1043, 795, 735, 699  $\text{cm}^{-1}$ ;  **$^1\text{H}$  NMR (300 MHz,  $\text{CDCl}_3$ )**  $\delta$  7.38–7.28 (m, 5H, phenyl-H), 6.20 (q,  $J = 6.9$  Hz, 1H, methine-H), 4.49 (s, 1H,  $\alpha$ -vinylic H), 4.47 (ABq,  $J = 11.5$  Hz, 1H, benzylic H), 4.41 (ABq,  $J = 11.5$  Hz, 1H, benzylic H), 3.62 (s, 3H,  $\text{CO}_2\text{Me}$ ), 3.42–3.38 (br, 4H, pyrrolidine-H), 1.86–1.81 (m, 4H, pyrrolidine-H), 1.47 (d,  $J = 6.9$  Hz, 3H, Me);  **$^{13}\text{C}$  NMR (75 MHz,  $\text{CDCl}_3$ )**  $\delta$  168.7 (C), 162.2 (C), 138.3 (C), 128.3 (CH  $\times$  2), 127.7 (CH  $\times$  2), 127.5 (CH), 84.3 (CH), 71.5 (CH and  $\text{CH}_2$ ), 50.1 ( $\text{CH}_3$ ), 49.1 ( $\text{CH}_2 \times 2$ ), 25.1 ( $\text{CH}_2 \times 2$ ), 19.2 ( $\text{CH}_3$ ); **HRMS-EI** calcd for  $\text{C}_{17}\text{H}_{23}\text{NO}_3$ , 289.1678 found 289.1684.

#### General procedure for the synthesis of vinylogous urethanes from acetylenic esters

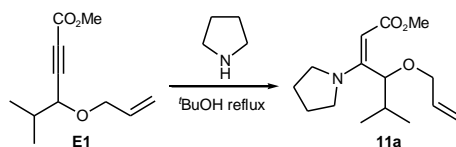

**Synthesis of (E)-methyl 4-(allyloxy)-5-methyl-3-(pyrrolidin-1-yl)hex-2-enoate (11a).** To a solution of acetylenic ester **E1** (1.05 g, 5.35 mmol) in a 25 mL round-bottom flask with *tert*-butanol (8 mL) as solvent was added pyrrolidine (0.54 mL, 6.42 mmol). The reaction mixture was heated to reflux at 100  $^\circ\text{C}$  for 40 min. After removal of solvent under *vacuo*, product **11a** as a pale-yellow oil was obtained in 99% yield (1.41 g) and then used in the next reaction without further purifications. **FT-IR** (neat)  $\nu$  3011, 2964, 2873, 1680, 1569, 1462, 1443, 1423, 1391, 1344, 1257, 1230, 1185, 1138, 1063, 998, 823, 798  $\text{cm}^{-1}$ ;  **$^1\text{H}$  NMR (300 MHz,  $\text{CDCl}_3$ )** 5.89 (ddt,  $J = 17.2, 10.4, 5.6$  Hz, 1H, vinylic H), 5.68 (d,  $J = 9.7$  Hz, 1H, methine-H), 5.23 (dd,  $J = 17.2, 1.9$  Hz, 1H, geminal-H), 5.10 (dd,  $J = 10.4, 1.9$  Hz, 1H, geminal-H), 4.59 (s, 1H,  $\alpha$ -vinylic H), 3.92 (d,  $J = 5.6$  Hz, 2H, allylic H), 3.60 (s, 3H,  $\text{CO}_2\text{Me}$ ), 3.60–3.57 (br, 2H, pyrrolidine-H), 3.28 (br, 2H, pyrrolidine-H), 2.00–1.65 (m, 5H, pyrrolidine- and methine-H), 1.09 (d,  $J = 6.4$  Hz, 3H,

Me), 0.84 (d,  $J = 6.4$  Hz, 3H, Me);  $^{13}\text{C}$  NMR (75 MHz,  $\text{CDCl}_3$ )  $\delta$  168.9 (C), 160.3 (C), 134.9 (CH), 116.3 ( $\text{CH}_2$ ), 86.9 (CH), 79.9 (CH), 70.4 ( $\text{CH}_2$ ), 50.0 ( $\text{CH}_3$ ), 49.0 ( $\text{CH}_2 \times 2$ ), 30.9 (CH), 25.0 ( $\text{CH}_2 \times 2$ ), 20.4 ( $\text{CH}_3$ ), 18.3 ( $\text{CH}_3$ ); HRMS-EI calcd for  $\text{C}_{15}\text{H}_{25}\text{NO}_3$ , 267.1834 found 267.1823.

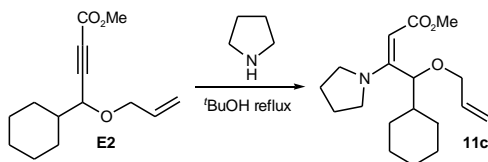

**(E)-methyl 4-(allyloxy)-4-cyclohexyl-3-(pyrrolidin-1-yl)but-2-enoate (11c).** Prepared according to the general procedure with acetylenic ester **E2** (1.20 g, 5.10 mmol) and pyrrolidine (0.50 mL, 6.12 mmol) to give product **11c** as a brown oil in 99% yield (1.55 g). FT-IR (neat)  $\nu$  3009, 2928, 2853, 1738, 1727, 1710, 1680, 1658, 1631, 1606, 1568, 1450, 1423, 1392, 1344, 1181, 1130, 1084, 1060, 994, 922, 796, 766, 734  $\text{cm}^{-1}$ ;  $^1\text{H}$  NMR (300 MHz,  $\text{CDCl}_3$ )  $\delta$  5.89 (ddt,  $J = 17.2, 10.4, 5.6$  Hz, 1H, vinylic H), 5.75 (d,  $J = 9.6$  Hz, 1H, methine-H), 5.22 (dd,  $J = 17.2, 1.9$  Hz, 1H, geminal-H), 5.11 (dd,  $J = 10.4, 1.9$  Hz, 1H, geminal-H), 4.58 (s, 1H,  $\alpha$ -vinylic H), 3.92 (d,  $J = 5.6$  Hz, 2H, allylic H), 3.60 (s, 3H,  $\text{CO}_2\text{Me}$ ), 3.58 (br, 2H, pyrrolidine-H), 3.28–3.26 (br, 2H, pyrrolidine-H), 2.22–2.18 (m, 1H, methine-H), 1.85–1.78 (m, 4H, pyrrolidine-H), 1.75–1.62 (m, 4H, cyclohexyl-H), 1.44–1.20 (m, 6H, cyclohexyl-H);  $^{13}\text{C}$  NMR (75 MHz,  $\text{CDCl}_3$ )  $\delta$  168.8 (C), 159.9 (C), 134.8 (CH), 116.3 ( $\text{CH}_2$ ), 86.8 (CH), 78.8 (CH), 70.2 ( $\text{CH}_2$ ), 49.9 ( $\text{CH}_3$ ), 48.9 ( $\text{CH}_2 \times 2$ ), 40.4 (CH), 31.1 ( $\text{CH}_2$ ), 30.2 ( $\text{CH}_2$ ), 26.1 ( $\text{CH}_2$ ), 26.0 ( $\text{CH}_2$ ), 25.9 ( $\text{CH}_2$ ), 24.9 ( $\text{CH}_2 \times 2$ ); HRMS-EI calcd for  $\text{C}_{18}\text{H}_{29}\text{NO}_3$ , 307.2147 found 307.2153.

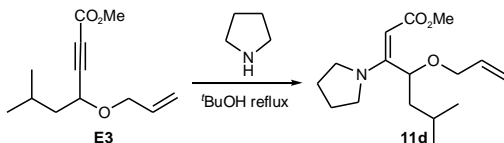

**(E)-methyl 4-(allyloxy)-6-methyl-3-(pyrrolidin-1-yl)hept-2-enoate (11d).** A Prepared according to the general procedure with acetylenic ester **E3** (1.07 g, 5.10 mmol) and pyrrolidine (0.50 mL, 6.12 mmol) to give product **11d** as a pale-yellow oil in 99% yield (1.42 g). FT-IR (neat)  $\nu$  2953, 2870, 1681, 1566, 1483, 1462, 1443, 1422, 1391, 1344, 1267, 1185, 1137, 1085, 1064, 1041, 990, 923, 907, 795  $\text{cm}^{-1}$ ;  $^1\text{H}$  NMR (300 MHz,  $\text{CDCl}_3$ )  $\delta$  6.03 (dd,  $J = 9.7, 3.9$  Hz, 1H, methine-H), 5.90 (ddt,  $J = 17.2, 10.4, 5.6$  Hz, 1H, vinylic H), 5.23 (dd,  $J = 17.2, 1.9$  Hz, 1H,

geminal-H), 5.12 (dd,  $J = 10.4, 1.9$  Hz, 1H, geminal-H), 4.47 (s, 1H,  $\alpha$ -vinylic H), 3.90 (d,  $J = 5.6$  Hz, 2H, allylic H), 3.61 (s, 3H, CO<sub>2</sub>Me), 3.60–3.57 (br, 2H, pyrrolidine-H), 3.38–3.36 (br, 2H, pyrrolidine-H), 1.98–1.62 (m, 6H, methine-, methylene- and pyrrolidine-H), 1.41–1.39 (m, 1H, methylene-H), 0.98 (d,  $J = 6.7$  Hz, 3H, Me), 0.96 (d,  $J = 6.7$  Hz, 3H, Me); <sup>13</sup>C NMR (75 MHz, CDCl<sub>3</sub>)  $\delta$  168.6 (C), 162.0 (C), 134.8 (CH), 116.6 (CH<sub>2</sub>), 84.7 (CH), 73.3 (CH), 70.2 (CH<sub>2</sub>), 50.1 (CH<sub>3</sub>), 49.2 (CH<sub>2</sub>  $\times$  2), 42.4 (CH<sub>2</sub>), 25.2 (CH and CH<sub>2</sub>  $\times$  2), 23.5 (CH<sub>3</sub>), 21.8 (CH<sub>3</sub>); HRMS-EI calcd for C<sub>16</sub>H<sub>27</sub>NO<sub>3</sub>, 281.1991 found 281.1998.

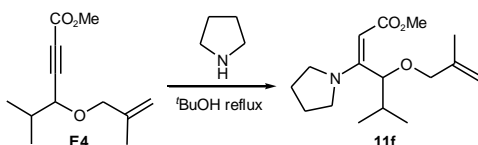

**(E)-methyl 4-(2-methylallyloxy)-5-methyl-3-(pyrrolidin-1-yl)hex-2-enoate (11f)**. Prepared according to the general procedure with acetylenic ester **E4** (1.07 g, 5.10 mmol) and pyrrolidine (0.50 mL, 6.12 mmol) to give product **11f** as a pale-yellow oil in 99% yield (1.42 g). FT-IR (neat)  $\nu$  2955, 2871, 1681, 1568, 1483, 1462, 1443, 1422, 1391, 1344, 1267, 1185, 1137, 1064, 998, 923, 798 cm<sup>-1</sup>; <sup>1</sup>H NMR (300 MHz, CDCl<sub>3</sub>) 5.65 (d,  $J = 9.7$  Hz, 1H, methine-H), 4.92 (s, 1H, geminal-H), 4.81 (s, 1H, geminal-H), 4.59 (s, 1H,  $\alpha$ -vinylic H), 3.80 (s, 2H, allylic H), 3.59 (s, 3H, CO<sub>2</sub>Me), 3.60–3.58 (br, 2H, pyrrolidine-H), 3.30–3.28 (br, 2H, pyrrolidine-H), 2.00–1.65 (m, 5H, pyrrolidine- and methine-H), 1.71 (s, 3H, vinylic Me), 1.12 (d,  $J = 6.4$  Hz, 3H, Me), 0.84 (d,  $J = 6.4$  Hz, 3H, Me); <sup>13</sup>C NMR (75 MHz, CDCl<sub>3</sub>)  $\delta$  168.9 (C), 160.3 (C), 142.5 (C), 111.5 (CH<sub>2</sub>), 87.0 (CH), 79.9 (CH), 73.4 (CH<sub>2</sub>), 50.0 (CH<sub>3</sub>), 49.0 (CH<sub>2</sub>  $\times$  2), 31.0 (CH), 25.0 (CH<sub>2</sub>  $\times$  2), 20.4 (CH<sub>3</sub>), 19.7 (CH<sub>3</sub>), 18.3 (CH<sub>3</sub>); HRMS-EI calcd for C<sub>16</sub>H<sub>27</sub>NO<sub>3</sub>, 281.1991 found 281.1998.

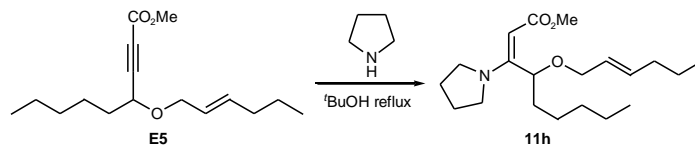

**(2E)-methyl 4-((E)-hex-2-enyloxy)-3-(pyrrolidin-1-yl)non-2-enoate (11h)**. Prepared according to the general procedure with acetylenic ester **E5** (1.35 g, 5.10 mmol) and pyrrolidine (0.50 mL, 6.12 mmol) to give product **11h** as a pale-yellow oil in 99% yield (1.70 g). FT-IR (neat)  $\nu$  2956, 2930, 2871, 1687, 1567, 1462, 1443, 1422, 1383, 1344, 1184, 1138, 1090, 1064, 1042, 970, 796 ; <sup>1</sup>H NMR (300 MHz, CDCl<sub>3</sub>)  $\delta$  5.89 (dd,  $J = 9.1, 4.4$  Hz, 1H, methine-H), 5.64 (dt,  $J = 15.4, 6.3$

Hz, 1H, vinylic H), 5.52 (dt,  $J = 15.4, 6.8$  Hz, 1H, vinylic H), 4.47 (s, 1H,  $\alpha$ -vinylic H), 3.85 (d,  $J = 6.3$  Hz, 2H, allylic H), 3.60 (s, 3H, CO<sub>2</sub>Me), 3.52–3.50 (br, 2H, pyrrolidine-H), 3.38–3.36 (br, 2H, pyrrolidine-H), 1.99 (dd,  $J = 14.1, 6.8$  Hz, 2H, allylic H), 1.90–1.85 (m, 4H, pyrrolidine-H), 1.78–1.75 (m, 2H, methylene-H), 1.62–1.22 (m, 8H, homoallylic and pentyl-H), 0.88 (t,  $J = 7.3$  Hz, 3H, Me), 0.87 (t,  $J = 7.3$  Hz, 3H, Me); <sup>13</sup>C NMR (75 MHz, CDCl<sub>3</sub>)  $\delta$  168.5 (C), 161.9 (C), 134.2 (CH), 126.2 (CH), 84.7 (CH), 74.2 (CH), 70.1 (CH<sub>2</sub>), 49.8 (CH<sub>3</sub>), 49.0 (CH<sub>2</sub>  $\times$  2), 34.2 (CH<sub>2</sub>), 33.6 (CH<sub>2</sub>), 31.6 (CH<sub>2</sub>), 25.8 (CH<sub>2</sub>), 24.9 (CH<sub>2</sub>  $\times$  2), 22.4 (CH<sub>2</sub>), 22.0 (CH<sub>2</sub>), 13.9 (CH<sub>3</sub>), 13.5 (CH<sub>3</sub>); HRMS-EI calcd for C<sub>20</sub>H<sub>35</sub>NO<sub>3</sub>, 337.2617 found 337.2626.

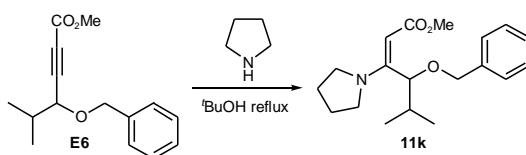

**(E)-methyl 4-(benzyloxy)-5-methyl-3-(pyrrolidin-1-yl)hex-2-enoate (11k)**. Prepared according to the general procedure with acetylenic ester **E6** (1.25 g, 5.10 mmol) and pyrrolidine (0.50 mL, 6.12 mmol) to give product **11k** as a pale-yellow oil in 98% yield (1.59 g). FT-IR (neat)  $\nu$  2963, 2870, 1680, 1568, 1462, 1452, 1423, 1383, 1344, 1265, 1185, 1136, 1063, 998, 948, 896, 797, 748, 736, 699 cm<sup>-1</sup>; <sup>1</sup>H NMR (300 MHz, CDCl<sub>3</sub>)  $\delta$  7.38–7.18 (m, 5H, phenyl-H), 5.83 (d,  $J = 9.7$  Hz, 1H, methine-H), 4.64 (s, 1H,  $\alpha$ -vinylic H), 4.53 (ABq,  $J = 11.5$  Hz, 1H, benzylic-H), 4.47 (ABq,  $J = 11.5$  Hz, 1H, benzylic-H), 3.63 (s, 3H, CO<sub>2</sub>Me), 3.62–3.58 (br, 2H, pyrrolidine-H), 3.31–3.28 (br, 2H, pyrrolidine-H), 2.04–1.20 (m, 1H, methine-H), 1.88–1.80 (m, 4H, pyrrolidine-H), 1.17 (d,  $J = 6.4$  Hz, 3H, Me), 0.89 (d,  $J = 6.4$  Hz, 3H, Me); <sup>13</sup>C NMR (75 MHz, CDCl<sub>3</sub>)  $\delta$  168.9 (C), 160.1 (C), 138.7 (C), 128.1 (CH  $\times$  2), 127.7 (CH  $\times$  2), 127.3 (CH), 87.1 (CH), 80.4 (CH), 71.8 (CH<sub>2</sub>), 50.0 (CH<sub>3</sub>), 49.0 (CH<sub>2</sub>  $\times$  2), 30.9 (CH), 25.0 (CH<sub>2</sub>  $\times$  2), 20.4 (CH<sub>3</sub>), 18.3 (CH<sub>3</sub>); HRMS-EI calcd for C<sub>19</sub>H<sub>27</sub>NO<sub>3</sub>, 317.1991 found 317.1992.

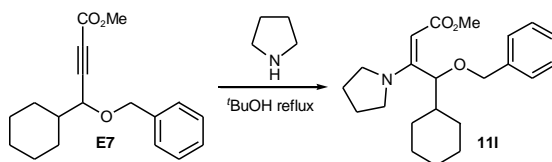

**(E)-methyl 4-(benzyloxy)-4-cyclohexyl-3-(pyrrolidin-1-yl)but-2-enoate (11l)**. Prepared according to the general procedure with acetylenic ester **E7** (1.46 g, 5.10 mmol) and pyrrolidine (0.50 mL, 6.12 mmol) to give product **11l** as a brown oil in 99% yield (1.81 g). FT-IR (neat)  $\nu$

2927, 2852, 1743, 1726, 1682, 1568, 1451, 1422, 1389, 1344, 1265, 1182, 1137, 1086, 1060, 906, 889, 797, 736, 699  $\text{cm}^{-1}$ ;  $^1\text{H NMR}$  (300 MHz,  $\text{CDCl}_3$ )  $\delta$  7.34–7.25 (m, 5H, phenyl-H), 5.88 (d,  $J = 9.6$  Hz, 1H, methine-H), 4.61 (s, 1H,  $\gamma$ -vinylicH), 4.49 (ABq,  $J = 11.6$  Hz, 1H, benzylic H), 4.44 (ABq,  $J = 11.6$  Hz, 1H, benzylic H), 3.62 (s, 3H,  $\text{CO}_2\text{Me}$ ), 3.60–3.57 (br, 2H, pyrrolidine-H), 3.31–3.26 (br, 2H, pyrrolidine-H), 2.23–2.18 (m, 1H, cyclohexyl-H), 1.85–1.80 (m, 4H, pyrrolidine-H), 1.80–1.62 (m, 4H, cyclohexyl-H), 1.43–1.41 (m, 2H, cyclohexyl-H), 1.16–1.13 (m, 4H, cyclohexyl-H);  $^{13}\text{C NMR}$  (75 MHz,  $\text{CDCl}_3$ )  $\delta$  168.9 (C), 159.9 (C), 138.7 (C), 128.2 ( $\text{CH} \times 2$ ), 127.7 ( $\text{CH} \times 2$ ), 127.3 (CH), 87.0 (CH), 79.5 (CH), 71.8 ( $\text{CH}_2$ ), 50.0 ( $\text{CH}_3$ ), 49.0 ( $\text{CH}_2 \times 2$ ), 40.5 (CH), 30.9 ( $\text{CH}_2$ ), 28.2 ( $\text{CH}_2$ ), 26.2 ( $\text{CH}_2$ ), 26.1 ( $\text{CH}_2$ ), 26.0 ( $\text{CH}_2$ ), 24.9 ( $\text{CH}_2 \times 2$ ); HRMS-EI calcd for  $\text{C}_{22}\text{H}_{31}\text{NO}_3$ , 357.2304 found 357.2307.

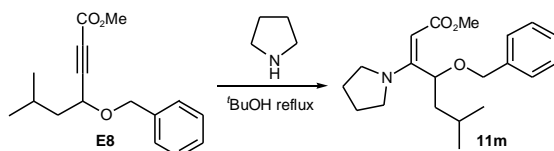

**(E)-methyl 4-(benzyloxy)-6-methyl-3-(pyrrolidin-1-yl)hept-2-enoate (11m).** Prepared according to the general procedure with acetylenic ester **E8** (1.33 g, 5.10 mmol) and pyrrolidine (0.50 mL, 6.12 mmol) to give product **11m** as a brown oil in 99% yield (1.68 g). **FT-IR** (neat)  $\nu$  2954, 2869, 1679, 1566, 1462, 1423, 1384, 1265, 1184, 1138, 1088, 1041, 991, 923, 795, 748, 736, 698  $\text{cm}^{-1}$ ;  $^1\text{H NMR}$  (300 MHz,  $\text{CDCl}_3$ )  $\delta$  7.42–7.26 (m, 5H, phenyl-H), 6.15 (dd,  $J = 9.8$ , 3.8 Hz, 1H, methine-H), 4.50 (s, 1H,  $\gamma$ -vinylicH), 4.46 (ABq,  $J = 11.6$  Hz, 1H, benzylic H), 4.42 (ABq,  $J = 11.6$  Hz, 1H, benzylic H), 3.62 (s, 3H,  $\text{CO}_2\text{Me}$ ), 3.60–3.57 (br, 2H, pyrrolidine-H), 3.30–3.26 (br, 2H, pyrrolidine-H), 1.98–1.72 (m, 6H, methylene-, methine- and pyrrolidine-H), 1.43–1.41 (m, 1H, methylene-H), 0.98 (d,  $J = 6.7$  Hz, 3H, Me), 0.96 (d,  $J = 6.7$  Hz, 3H, Me);  $^{13}\text{C NMR}$  (75 MHz,  $\text{CDCl}_3$ )  $\delta$  168.6 (C), 161.9 (C), 138.5 (C), 128.2 ( $\text{CH} \times 2$ ), 127.7 ( $\text{CH} \times 2$ ), 127.4 (CH), 84.8 (CH), 73.8 (CH), 71.5 ( $\text{CH}_2$ ), 50.1 ( $\text{CH}_3$ ), 49.2 ( $\text{CH}_2 \times 2$ ), 42.4 ( $\text{CH}_2$ ), 25.2 (CH), 24.3 ( $\text{CH}_2 \times 2$ ), 23.4 ( $\text{CH}_3$ ), 21.7 ( $\text{CH}_3$ ); HRMS-EI calcd for  $\text{C}_{20}\text{H}_{29}\text{NO}_3$ , 331.2147 found 331.2142.

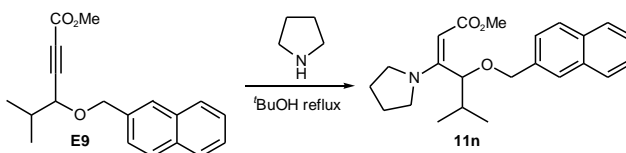



**(E)-methyl 4-[(naphthalen-3-yl)methoxy]-5-methyl-3-(pyrrolidin-1-yl)hex-2-enoate (11n).** Prepared according to the general procedure with acetylenic ester **E9** (1.52 g, 5.10 mmol) and pyrrolidine (0.50 mL, 6.12 mmol) to give product **11n** as a brown oil in 98% yield (1.85 g). **FT-IR** (neat)  $\nu$  2963, 2871, 1754, 1687, 1567, 1442, 1423, 1383, 1345, 1265, 1137, 1063, 947, 895, 856, 817, 796, 752;  **$^1\text{H}$  NMR (300 MHz,  $\text{CDCl}_3$ )**  $\delta$  7.85–7.66 (m, 4H, naphthalene-H), 7.51–7.42 (m, 3H, naphthalene-H), 5.81 (d,  $J = 9.7$  Hz, 1H, methine-H), 4.51 (ABq,  $J = 11.5$  Hz, 1H, benzylic H), 4.63 (s, 1H,  $\gamma$ -vinylicH), 4.45 (ABq,  $J = 11.5$  Hz, 1H, benzylic H), 3.62 (s, 3H,  $\text{CO}_2\text{Me}$ ), 3.60–3.58 (br, 2H, pyrrolidine-H), 3.30–3.27 (br, 2H, pyrrolidine-H), 2.02–2.00 (m, 1H, methine-H), 1.86–1.80 (m, 4H, pyrrolidine-H), 1.14 (d,  $J = 6.4$  Hz, 3H, Me), 0.86 (d,  $J = 6.4$  Hz, 3H, Me);  **$^{13}\text{C}$  NMR (75 MHz,  $\text{CDCl}_3$ )**  $\delta$  168.9 (C), 160.1 (C), 136.2 (C), 133.2 (C), 132.8 (C), 127.8 (CH  $\times$  2), 127.6 (CH), 126.4 (CH), 126.0 (CH), 125.9 (CH), 125.7 (CH), 87.2 (CH), 80.5 (CH), 72.0 ( $\text{CH}_2$ ), 50.0 ( $\text{CH}_3$ ), 49.0 ( $\text{CH}_2 \times 2$ ), 31.0 (CH), 25.0 ( $\text{CH}_2 \times 2$ ), 20.5 ( $\text{CH}_3$ ), 18.3 ( $\text{CH}_3$ ); **HRMS-EI** calcd for  $\text{C}_{23}\text{H}_{29}\text{NO}_3$ , 367.2147 found 367.2142.

### General procedure for the synthesis of 2,3,3,4-tetrasubstituted oxetanes

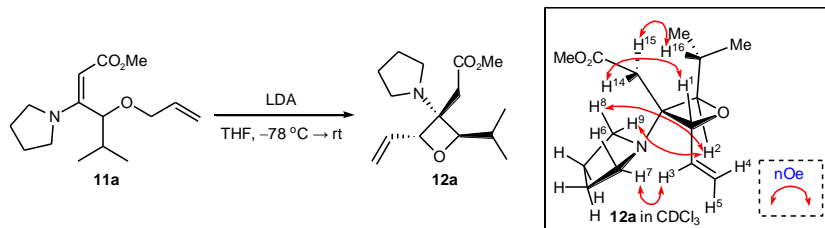

**Synthesis of [(2*R*,3*R*,4*R*)-2-isopropyl-3-pyrrolidin-1-yl-4-vinyl-oxetan-3-yl]-acetic acid methyl ester (**12a**).** To compound **11a** (200 mg, 0.75 mmol, 1.0 equiv.) with THF (7.5 mL) at  $-78$  °C in a flame-dried 25 mL round-bottomed flask was added a solution of LDA (1.9 mL, 1.87 mmol, 2.5 equiv., 1.0 *N* in THF/*n*-hexane). The reaction mixture was stirred for 1 hour at  $-78$  °C, which was then removed the dry-ice bath and allowed to warm to ambient temperature over a period of 10 minutes. The reaction was quenched by the addition of aqueous ammonium chloride solution (1.0 M, 2.0 mL), the reaction mixture was extracted with EtOAc (6 mL  $\times$  2). The combined organic layer was washed with brine, then dried over anhydrous sodium sulfate, and concentrated to give crude material. Purification by flash column chromatography (*n*-hexane/EtOAc, 10:1) to afford oxetane **12a** (152 mg, 0.57 mmol) as a pale-yellow solid in 76%

yield. m.p. 44.5–47.5 °C (recrystallized from hexanes: EtOAc (4:1));  $R_f = 0.33$  (SiO<sub>2</sub>, 4:1 v/v, *n*-hexane/EtOAc); **FT-IR** (neat)  $\nu$  2960, 2874, 2808, 1735, 1717, 1699, 1558, 1541, 1521, 1508, 1472, 1457, 1435, 1387, 1363, 1338, 1257, 1196, 1177, 1153, 1129, 1057, 995, 935, 923, 884 cm<sup>-1</sup>; **<sup>1</sup>H NMR (300 MHz, CDCl<sub>3</sub>)**  $\delta$  6.39 (ddd,  $J = 17.3, 10.3, 7.5$  Hz, 1H, H<sup>3</sup>), 5.39 (ddd,  $J = 17.3, 2.0, 1.1$  Hz, 1H, H<sup>4</sup>), 5.26 (ddd,  $J = 10.3, 2.0, 1.0$  Hz, 1H, H<sup>5</sup>), 5.11 (ddd,  $J = 7.5, 1.1, 1.0$  Hz, 1H, H<sup>1</sup>), 4.16 (d,  $J = 11.4$  Hz, 1H, H<sup>2</sup>), 3.66 (s, 3H, OMe), 2.81 (s, 2H, H<sup>14</sup> and H<sup>15</sup>), 2.66–2.63 (m, 2H, H<sup>7</sup> and H<sup>9</sup>), 2.50–2.47 (m, 2H, H<sup>6</sup> and H<sup>8</sup>), 1.94–1.92 (m, 1H, H<sup>16</sup>), 1.69–1.65 (m, 4H, H<sup>10</sup>, H<sup>11</sup>, H<sup>12</sup> and H<sup>13</sup>), 0.95 (d,  $J = 6.4$  Hz, 3H, Me<sup>2</sup>), 0.83 (d,  $J = 6.4$  Hz, 3H, Me<sup>1</sup>); **<sup>13</sup>C NMR (75 MHz, CDCl<sub>3</sub>)**  $\delta$  172.7 (C), 136.3 (CH), 118.0 (CH<sub>2</sub>), 91.4 (CH), 85.8 (CH), 65.3 (C), 51.5 (CH<sub>3</sub>), 46.8 (CH<sub>2</sub> × 2), 32.2 (CH), 30.6 (CH<sub>2</sub>), 23.6 (CH<sub>2</sub> × 2), 18.5 (CH<sub>3</sub>), 18.3 (CH<sub>3</sub>); **HRMS-EI** calcd for C<sub>15</sub>H<sub>25</sub>NO<sub>3</sub>, 267.1834 found 267.1845.

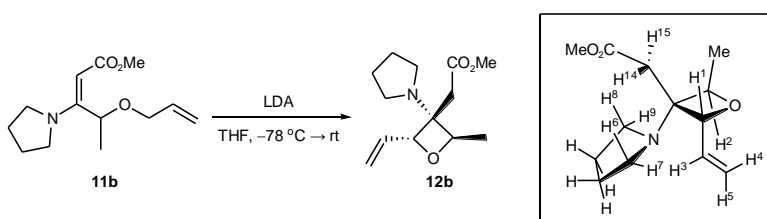

**Synthesis of [(2*R*,3*R*,4*R*)-2-methyl-3-pyrrolidin-1-yl-4-vinyl-oxetan-3-yl]-acetic acid methyl ester (**12b**).** Prepared according to the representative procedure with compound **11b** (180 mg, 0.75 mmol) and LDA to give oxetane **12b** (112 mg, 0.47 mmol) as a pale-yellow oil in 62% yield.  $R_f = 0.25$  (SiO<sub>2</sub>, 4:1 v/v, *n*-hexane/EtOAc); **FT-IR** (neat)  $\nu$  2966, 2874, 1736, 1461, 1367, 1332, 1261, 1197, 1062, 919, 867 cm<sup>-1</sup>; **<sup>1</sup>H NMR (300 MHz, CDCl<sub>3</sub>)**  $\delta$  6.39 (ddd,  $J = 17.4, 10.3, 7.3$  Hz, 1H, H<sup>3</sup>), 5.39 (ddd,  $J = 17.4, 1.9, 1.2$  Hz, 1H, H<sup>4</sup>), 5.26 (ddd,  $J = 10.3, 1.9, 1.0$  Hz, 1H, H<sup>5</sup>), 5.08 (d,  $J = 7.2$  Hz, 1H, H<sup>1</sup>), 4.87 (q,  $J = 6.4$  Hz, 1H, H<sup>2</sup>), 3.66 (s, 3H, OMe), 2.79 (ABq,  $J = 15.1$  Hz, 1H, H<sup>14</sup>), 2.73 (ABq,  $J = 15.1$  Hz, 1H, H<sup>15</sup>), 2.63–2.60 (m, 2H, H<sup>7</sup> and H<sup>9</sup>), 2.51–2.49 (m, 2H, H<sup>6</sup> and H<sup>8</sup>), 1.77–1.72 (m, 4H, H<sup>10</sup>, H<sup>11</sup>, H<sup>12</sup> and H<sup>13</sup>), 1.31 (d,  $J = 6.4$  Hz, 3H, Me); **<sup>13</sup>C NMR (75 MHz, CDCl<sub>3</sub>)**  $\delta$  172.6 (C), 135.8 (CH), 117.8 (CH<sub>2</sub>), 87.0 (CH), 82.5 (CH), 65.2 (C), 51.6 (CH<sub>3</sub>), 46.2 (CH<sub>2</sub> × 2), 32.5 (CH<sub>2</sub>), 23.8 (CH<sub>2</sub> × 2), 17.7 (CH<sub>3</sub>); **HRMS-EI** calcd for C<sub>13</sub>H<sub>21</sub>NO<sub>3</sub>, 239.1521 found 239.1524.

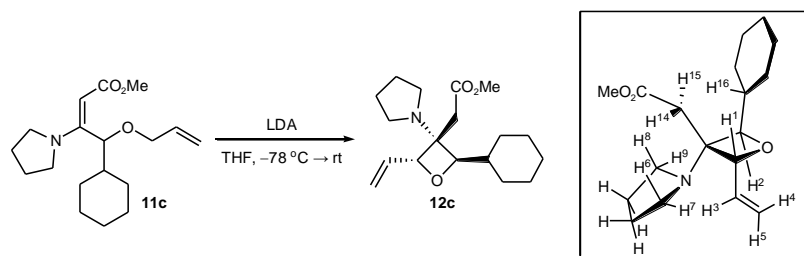

**Synthesis of [(2*R*,3*R*,4*R*)-2-cyclohexyl-3-pyrrolidin-1-yl-4-vinyl-oxetan-3-yl]-acetic acid methyl ester (**12c**).** Prepared according to the representative procedure with compound **11c** (230 mg, 0.75 mmol) and LDA to give oxetane **12c** (161 mg, 0.52 mmol) as a pale-yellow oil in 70% yield.  $R_f = 0.41$  (SiO<sub>2</sub>, 4:1 v/v, *n*-hexane/EtOAc); **FT-IR** (neat)  $\nu$  2926, 2852, 2807, 1735, 1717, 1699, 1684, 1652, 1636, 1558, 1541, 1521, 1508, 1449, 1436, 1338, 1258, 1196, 1176, 1153, 1129, 1056, 1046, 1016, 989, 923, 882 cm<sup>-1</sup>; **<sup>1</sup>H NMR (300 MHz, CDCl<sub>3</sub>)**  $\delta$  6.35 (ddd,  $J = 17.6, 10.3, 7.5$  Hz, 1H, H<sup>3</sup>), 5.34 (ddd,  $J = 17.3, 1.8, 0.9$  Hz, 1H, H<sup>4</sup>), 5.21 (dd,  $J = 10.3, 2.0, 0.8$  Hz, 1H, H<sup>5</sup>), 5.07 (d,  $J = 7.5$  Hz, 1H, H<sup>1</sup>), 4.22 (d,  $J = 10.4$  Hz, 1H, H<sup>2</sup>), 3.62 (s, 3H, OMe), 2.79 (s, 3H, H<sup>14</sup> and H<sup>15</sup>), 2.62–2.58 (m, 2H, H<sup>7</sup> and H<sup>9</sup>), 2.42–2.38 (m, 2H, H<sup>6</sup> and H<sup>8</sup>), 1.93–1.89 (m, 1H, H<sup>17</sup>), 1.68–1.47 (m, 8H, H<sup>16</sup>, H<sup>18</sup>–H<sup>20</sup> and H<sup>23</sup>–H<sup>26</sup>), 1.12–1.09 (m, 4H, H<sup>10</sup>, H<sup>11</sup>, H<sup>12</sup> and H<sup>13</sup>), 0.85–0.77 (m, 2H, H<sup>21</sup> and H<sup>22</sup>); **<sup>13</sup>C NMR (75 MHz, CDCl<sub>3</sub>)**  $\delta$  172.6 (C), 136.2 (CH), 117.9 (CH<sub>2</sub>), 89.9 (CH), 85.8 (CH), 65.3 (C), 51.5 (CH<sub>3</sub>), 46.7 (CH<sub>2</sub> × 2), 40.2 (CH), 31.8 (CH<sub>2</sub>), 28.9 (CH<sub>2</sub>), 28.0 (CH<sub>2</sub>), 26.3 (CH<sub>2</sub>), 25.4 (CH<sub>2</sub> × 2), 23.4 (CH<sub>2</sub> × 2); **HRMS-EI** calcd for C<sub>18</sub>H<sub>29</sub>NO<sub>3</sub>, 307.2147 found 307.2141.

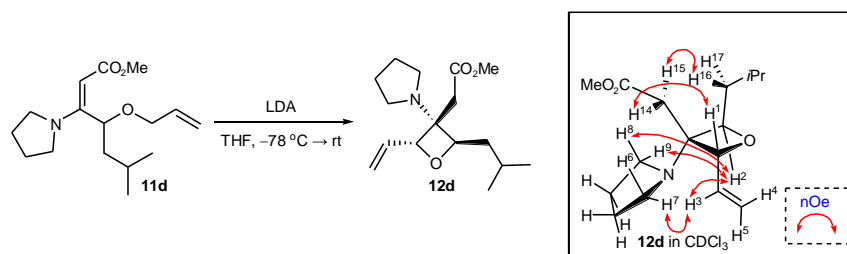

**Synthesis of [(2*R*,3*R*,4*R*)-2-isobutyl-3-pyrrolidin-1-yl-4-vinyl-oxetan-3-yl]-acetic acid methyl ester (**12d**).** Prepared according to the representative procedure with compound **11d** (210 mg, 0.75 mmol) and LDA to give oxetane **12d** (143 mg, 0.51 mmol) as a pale-yellow oil in 68% yield.  $R_f = 0.40$  (SiO<sub>2</sub>, 4:1 v/v, *n*-hexane/EtOAc); **FT-IR** (neat)  $\nu$  2954, 2872, 2810, 1736, 1717, 1699, 1653, 1636, 1558, 1541, 1521, 1508, 1457, 1435, 1396, 1386, 1362, 1338, 1245, 1197, 1177, 1147, 1133, 1074, 1009, 987, 921, 879 cm<sup>-1</sup>; **<sup>1</sup>H NMR (500 MHz, CDCl<sub>3</sub>)**  $\delta$  6.39 (ddd,  $J =$

17.2, 10.3, 7.5 Hz, 1H, H<sup>3</sup>), 5.39 (ddd,  $J = 17.2, 2.0, 1.1$  Hz, 1H, H<sup>4</sup>), 5.26 (ddd,  $J = 10.3, 2.0, 1.0$  Hz, 1H, H<sup>5</sup>), 5.09 (ddd,  $J = 7.5, 1.1, 1.0$  Hz, 1H, H<sup>1</sup>), 4.77 (dd,  $J = 11.4, 3.0$  Hz, 1H, H<sup>2</sup>), 3.65 (s, 3H, OMe), 2.79 (ABq,  $J = 15.2$  Hz, 1H, H<sup>14</sup>), 2.73 (ABq,  $J = 15.2$  Hz, 1H, H<sup>15</sup>), 2.65–2.61 (m, 2H, H<sup>7</sup> and H<sup>9</sup>), 2.49–2.45 (m, 2H, H<sup>6</sup> and H<sup>8</sup>), 1.73–1.60 (m, 6H, H<sup>17</sup>, H<sup>18</sup> and H<sup>10</sup>–H<sup>13</sup>), 1.31 (ddd,  $J = 13.7, 8.0, 3.0$  Hz, 1H, H<sup>16</sup>), 0.94 (d,  $J = 6.4$  Hz, 3H, Me), 0.82 (d,  $J = 6.4$  Hz, 3H, Me); <sup>13</sup>C NMR (126 MHz, CDCl<sub>3</sub>)  $\delta$  172.8 (C), 135.9 (CH), 117.9 (CH<sub>2</sub>), 86.8 (CH), 84.9 (CH), 65.2 (C), 51.6 (CH<sub>3</sub>), 46.3 (CH<sub>2</sub> × 2), 41.2 (CH<sub>2</sub>), 32.2 (CH<sub>2</sub>), 24.7 (CH), 23.7 (CH<sub>2</sub> × 2), 22.4 (CH<sub>3</sub>), 22.1 (CH<sub>3</sub>); HRMS-EI calcd for C<sub>16</sub>H<sub>27</sub>NO<sub>3</sub>, 281.1991 found 281.1998.

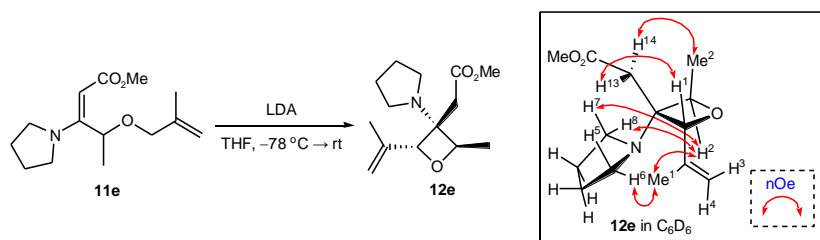

**Synthesis of [(2*R*,3*R*,4*R*)-2-isopropenyl-4-methyl-3-pyrrolidin-1-yl-oxetan-3-yl]-acetic acid methyl ester (12e).** Prepared according to the representative procedure with compound **11e** (190 mg, 0.75 mmol) and LDA to give oxetane **12e** (127 mg, 0.50 mmol) as a colorless oil in 67% yield.  $R_f = 0.35$  (SiO<sub>2</sub>, 4:1 v/v, *n*-hexane/EtOAc); **FT-IR** (neat)  $\nu$  2967, 1736, 1460, 1437, 1379, 1331, 1263, 1196, 1141, 1062, 1023, 952, 897 cm<sup>-1</sup>; <sup>1</sup>H NMR (300 MHz, CDCl<sub>3</sub>)  $\delta$  5.15 (s, 1H, H<sup>3</sup>), 5.12 (s, 1H, H<sup>1</sup>), 4.98 (q,  $J = 6.5$  Hz, 1H, H<sup>2</sup>), 4.96 (s, 1H, H<sup>4</sup>), 3.66 (s, 3H, OMe), 2.86 (ABq,  $J = 14.8$  Hz, 1H, H<sup>13</sup>), 2.77 (ABq,  $J = 14.8$  Hz, 1H, H<sup>14</sup>), 2.71–2.68 (m, 2H, H<sup>6</sup> and H<sup>8</sup>), 2.51–2.47 (m, 2H, H<sup>5</sup> and H<sup>7</sup>), 1.94 (s, 3H, Me<sup>1</sup>), 1.68–1.62 (m, 4H, H<sup>10</sup>–H<sup>13</sup>), 1.31 (d,  $J = 6.5$  Hz, 3H, Me<sup>2</sup>); <sup>13</sup>C NMR (75 MHz, CDCl<sub>3</sub>)  $\delta$  172.7 (C), 144.6 (C), 113.3 (CH<sub>2</sub>), 89.6 (CH), 81.7 (CH), 65.6 (C), 51.5 (CH<sub>3</sub>), 46.2 (CH<sub>2</sub> × 2), 34.7 (CH<sub>2</sub>), 23.9 (CH<sub>2</sub> × 2), 19.0 (CH<sub>3</sub>), 18.0 (CH<sub>3</sub>); <sup>1</sup>H NMR (600 MHz, C<sub>6</sub>D<sub>6</sub>)  $\delta$  5.44 (s, 1H, H<sup>3</sup>), 5.29 (s, 1H, H<sup>1</sup>), 5.02 (s, 1H, H<sup>4</sup>), 4.87 (q,  $J = 6.6$  Hz, 1H, H<sup>2</sup>), 3.28 (s, 3H, OMe), 2.67–2.64 (m, 2H, H<sup>6</sup> and H<sup>8</sup>), 2.60 (ABq,  $J = 14.9$  Hz, 1H, H<sup>13</sup>), 2.54 (ABq,  $J = 14.9$  Hz, 1H, H<sup>14</sup>), 2.40–2.37 (m, 2H, H<sup>5</sup> and H<sup>7</sup>), 2.09 (s, 3H, Me<sup>1</sup>), 1.44–1.42 (m, 4H, H<sup>10</sup>–H<sup>13</sup>), 1.10 (d,  $J = 6.6$  Hz, 3H, Me<sup>2</sup>); <sup>13</sup>C NMR (151 MHz, C<sub>6</sub>D<sub>6</sub>)  $\delta$  172.0 (C), 145.7 (C), 113.1 (CH<sub>2</sub>), 89.5 (CH), 81.2 (CH), 65.9 (C), 50.8 (CH<sub>3</sub>), 46.5 (CH<sub>2</sub> × 2), 34.9 (CH<sub>2</sub>), 24.1 (CH<sub>2</sub> × 2), 19.4 (CH<sub>3</sub>), 18.2 (CH<sub>3</sub>); **HRMS-EI** calcd for C<sub>14</sub>H<sub>23</sub>NO<sub>3</sub>, 253.1678 found 253.1670.

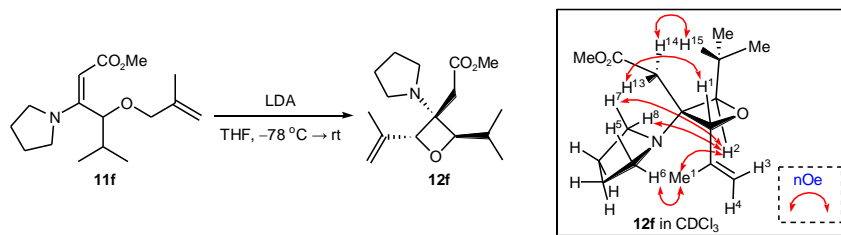

**Synthesis of [(2*R*,3*R*,4*R*)-2-isopropenyl-4-isopropyl-3-pyrrolidin-1-yl-oxetan-3-yl]-acetic acid methyl ester (**12f**).** Prepared according to the representative procedure with compound **11f** (210 mg, 0.75 mmol) and LDA to give oxetane **12f** (149 mg, 0.53 mmol) as a colorless oil in 71% yield.  $R_f = 0.50$  (SiO<sub>2</sub>, 4:1 v/v, *n*-hexane/EtOAc); **FT-IR** (neat)  $\nu$  2960, 2873, 2814, 1736, 1717, 1699, 1684, 1652, 1636, 1558, 1541, 1521, 1507, 1457, 1448, 1387, 1364, 1338, 1259, 1195, 1176, 1155, 1131, 1057, 1036, 997, 963, 898, 752 cm<sup>-1</sup>; **<sup>1</sup>H NMR (500 MHz, CDCl<sub>3</sub>)**  $\delta$  5.17 (s, 1H, H<sup>3</sup>), 5.13 (s, 1H, H<sup>1</sup>), 4.95 (s, 1H, H<sup>4</sup>), 4.28 (d,  $J = 10.5$  Hz, 1H, H<sup>2</sup>), 3.66 (s, 3H, OMe), 2.90 (ABq,  $J = 14.8$  Hz, 1H, H<sup>13</sup>), 2.83 (ABq,  $J = 14.8$  Hz, 1H, H<sup>14</sup>), 2.72–2.68 (m, 2H, H<sup>6</sup> and H<sup>8</sup>), 2.55–2.51 (m, 2H, H<sup>5</sup> and H<sup>7</sup>), 1.97 (s, 3H, Me<sup>1</sup>), 1.86 (td,  $J = 12.8, 10.5$  Hz, 1H, H<sup>15</sup>), 1.65–1.59 (m, 4H, H<sup>9</sup>–H<sup>12</sup>), 0.95 (d,  $J = 6.4$  Hz, 3H, Me), 0.82 (d,  $J = 6.4$  Hz, 3H, Me); **<sup>13</sup>C NMR (126 MHz, CDCl<sub>3</sub>)**  $\delta$  172.7 (C), 145.2 (C), 113.4 (CH<sub>2</sub>), 91.1 (CH), 88.2 (CH), 65.7 (C), 51.5 (CH<sub>3</sub>), 46.7 (CH<sub>2</sub> × 2), 34.2 (CH<sub>2</sub>), 30.4 (CH), 23.8 (CH<sub>2</sub> × 2), 19.0 (CH<sub>3</sub>), 18.7 (CH<sub>3</sub>), 18.4 (CH<sub>3</sub>); **HRMS-EI** calcd for C<sub>16</sub>H<sub>27</sub>NO<sub>3</sub>, 281.1991 found 281.1996.

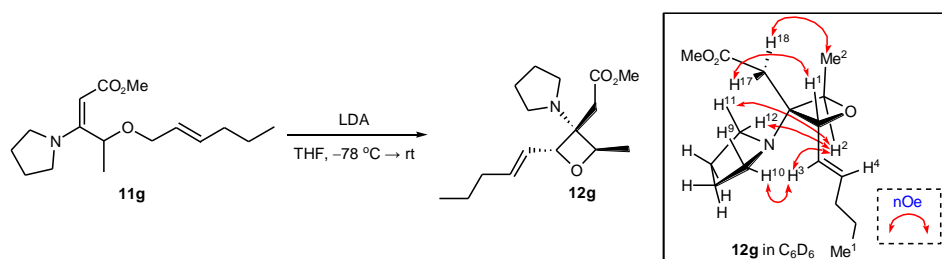

**Synthesis of [(2*R*,3*R*,4*R*)-2-methyl-4-(*E*)-pent-1-enyl-3-pyrrolidin-1-yl-oxetan-3-yl]-acetic acid methyl ester (**12g**).** Prepared according to the representative procedure with compound **11g** (210 mg, 0.75 mmol) and LDA to give oxetane **12g** (137 mg, 0.49 mmol) as a pale-yellow oil in 65% yield.  $R_f = 0.28$  (SiO<sub>2</sub>, 4:1 v/v, *n*-hexane/EtOAc); **FT-IR** (neat)  $\nu$  2960, 2931, 2873, 1733, 1456, 1436, 1374, 1196, 1140, 1070, 969, 945 cm<sup>-1</sup>; **<sup>1</sup>H NMR (300 MHz, CDCl<sub>3</sub>)**  $\delta$  6.02 (dd,  $J = 15.4, 8.3$  Hz, 1H, H<sup>3</sup>), 5.73 (dt,  $J = 15.4, 6.7$  Hz, 1H, H<sup>4</sup>), 4.97 (d,  $J = 8.3$  Hz, 1H, H<sup>1</sup>), 4.81 (q,  $J = 6.5$  Hz, 1H, H<sup>2</sup>), 3.61 (s, 3H, OMe), 2.71 (s, 2H, H<sup>17</sup> and H<sup>18</sup>), 2.60–2.57 (m, 2H, H<sup>10</sup> and H<sup>12</sup>),

2.46–2.44 (m, 2H, H<sup>9</sup> and H<sup>11</sup>), 2.03 (dd,  $J = 13.5, 6.7$  Hz, 2H, H<sup>5</sup> and H<sup>6</sup>), 1.68–1.60 (m, 4H, H<sup>13</sup>–H<sup>16</sup>), 1.42–1.37 (m, 2H, H<sup>7</sup> and H<sup>8</sup>), 1.25 (d,  $J = 6.5$  Hz, 3H, Me<sup>2</sup>), 0.86 (t,  $J = 7.3$  Hz, 3H, Me<sup>1</sup>); <sup>13</sup>C NMR (75 MHz, CDCl<sub>3</sub>) δ 172.7 (C), 135.2 (CH), 127.7 (CH), 86.8 (CH), 82.3 (CH), 65.0 (C), 51.4 (CH<sub>3</sub>), 46.0 (CH<sub>2</sub> × 2), 34.4 (CH<sub>2</sub>), 32.3 (CH<sub>2</sub>), 23.7 (CH<sub>2</sub> × 2), 22.0 (CH<sub>2</sub>), 17.7 (CH<sub>3</sub>), 13.6 (CH<sub>3</sub>); <sup>1</sup>H NMR (600 MHz, C<sub>6</sub>D<sub>6</sub>) δ 6.27 (dd,  $J = 15.4, 7.8$  Hz, 1H, H<sup>3</sup>), 5.86 (dt,  $J = 15.4, 6.7$  Hz, 1H, H<sup>4</sup>), 5.25 (d,  $J = 7.8$  Hz, 1H, H<sup>1</sup>), 4.86 (q,  $J = 6.5$  Hz, 1H, H<sup>2</sup>), 3.30 (s, 3H, OMe), 2.61–2.58 (m, 2H, H<sup>10</sup> and H<sup>12</sup>), 2.56 (s, 2H, H<sup>17</sup> and H<sup>18</sup>), 2.44–2.41 (m, 2H, H<sup>9</sup> and H<sup>11</sup>), 1.99 (dd,  $J = 13.5, 6.7$  Hz, 2H, H<sup>5</sup> and H<sup>6</sup>), 1.52–1.48 (m, 4H, H<sup>13</sup>–H<sup>16</sup>), 1.35–1.29 (m, 2H, H<sup>7</sup> and H<sup>8</sup>), 1.14 (d,  $J = 6.5$  Hz, 3H, Me<sup>2</sup>), 0.82 (t,  $J = 7.3$  Hz, 3H, Me<sup>1</sup>); <sup>13</sup>C NMR (151 MHz, C<sub>6</sub>D<sub>6</sub>) δ 172.3 (C), 134.0 (CH), 129.3 (CH), 86.8 (CH), 81.9 (CH), 65.4 (C), 50.9 (CH<sub>3</sub>), 46.3 (CH<sub>2</sub> × 2), 34.8 (CH<sub>2</sub>), 32.7 (CH<sub>2</sub>), 24.1 (CH<sub>2</sub> × 2), 22.5 (CH<sub>2</sub>), 17.9 (CH<sub>3</sub>), 13.8 (CH<sub>3</sub>); HRMS-EI calcd for C<sub>16</sub>H<sub>27</sub>NO<sub>3</sub>, 281.1991 found 281.1989.

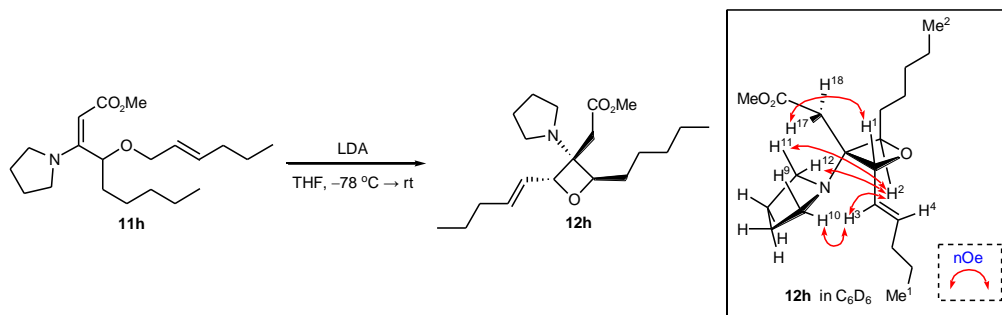

**Synthesis of [(2*R*,3*R*,4*R*)-2-(*E*)-pent-1-enyl-4-pentyl-3-pyrrolidin-1-yl-oxetan-3-yl]-acetic acid methyl ester (12h).** Prepared according to the representative procedure with compound **11h** (250 mg, 0.74 mmol) and LDA to give oxetane **12h** (167 mg, 0.50 mmol) as a pale-yellow oil in 67% yield.  $R_f = 0.52$  (SiO<sub>2</sub>, 4:1 v/v, *n*-hexane/EtOAc); FT-IR (neat)  $\nu$  2957, 2931, 2872, 1737, 1665, 1641, 1632, 1461, 1436, 1374, 1334, 1195, 1178, 1151, 1132, 1102, 1005, 968, 945, 910, 893 cm<sup>-1</sup>; <sup>1</sup>H NMR (300 MHz, CDCl<sub>3</sub>) δ 6.04 (ddt,  $J = 15.4, 8.4, 1.4$  Hz, 1H, H<sup>3</sup>), 5.76 (dt,  $J = 15.4, 6.5$  Hz, 1H, H<sup>4</sup>), 5.01 (d,  $J = 8.4$  Hz, 1H, H<sup>1</sup>), 4.61 (dd,  $J = 9.5, 3.6$  Hz, 1H, H<sup>2</sup>), 3.64 (s, 3H, OMe), 2.74 (s, 2H, H<sup>17</sup> and H<sup>18</sup>), 2.50–2.46 (m, 2H, H<sup>10</sup> and H<sup>12</sup>), 2.63–2.59 (m, 2H, H<sup>9</sup> and H<sup>11</sup>), 2.05 (q,  $J = 7.0$  Hz, 2H, H<sup>5</sup> and H<sup>6</sup>), 1.70–1.62 (m, 5H, H<sup>13</sup>–H<sup>16</sup> and H<sup>18</sup>), 1.54–1.51 (m, 1H, H<sup>19</sup>), 1.44–1.40 (m, 3H, H<sup>7</sup>, H<sup>8</sup> and H<sup>21</sup>), 1.30–1.18 (m, 5H, H<sup>22</sup>–H<sup>26</sup>), 0.89 (t,  $J = 7.2$  Hz, 3H, Me<sup>2</sup>), 0.87 (t,  $J = 7.0$  Hz, 3H, Me<sup>1</sup>); <sup>13</sup>C NMR (75 MHz, CDCl<sub>3</sub>) δ 172.8 (C), 135.5 (CH), 127.8 (CH), 86.6 (CH), 86.3 (CH), 65.0 (C), 51.5 (CH<sub>3</sub>), 46.2 (CH<sub>2</sub> × 2), 34.5 (CH<sub>2</sub>), 32.5 (CH<sub>2</sub>), 32.4 (CH<sub>2</sub>),

31.8 (CH<sub>2</sub>), 24.9 (CH<sub>2</sub>), 23.8 (CH<sub>2</sub> × 2), 22.5 (CH<sub>2</sub>), 22.1 (CH<sub>2</sub>), 13.9 (CH<sub>3</sub>), 13.7 (CH<sub>3</sub>); <sup>1</sup>H NMR (600 MHz, C<sub>6</sub>D<sub>6</sub>) δ 6.30 (ddt, *J* = 15.5, 7.7, 1.0 Hz, 1H, H<sup>3</sup>), 5.89 (dt, *J* = 15.5, 6.8 Hz, 1H, H<sup>4</sup>), 5.28 (d, *J* = 7.7 Hz, 1H, H<sup>1</sup>), 4.75 (dd, *J* = 9.8, 3.6 Hz, 1H, H<sup>2</sup>), 3.32 (s, 3H, OMe), 2.68–2.64 (m, 2H, H<sup>10</sup> and H<sup>12</sup>), 2.61 (s, 2H, H<sup>17</sup> and H<sup>18</sup>), 2.51–2.48 (m, 2H, H<sup>9</sup> and H<sup>11</sup>), 1.98 (q, *J* = 7.1 Hz, 2H, H<sup>5</sup> and H<sup>6</sup>), 1.67–1.62 (m, 1H, H<sup>20</sup>), 1.56–1.50 (m, 5H, H<sup>13</sup>–H<sup>16</sup> and H<sup>21</sup>), 1.45–1.41 (m, 1H, H<sup>19</sup>), 1.35–1.30 (m, 2H, H<sup>7</sup> and H<sup>8</sup>), 1.28–1.27 (m, 5H, H<sup>22</sup>–H<sup>26</sup>), 0.87 (t, *J* = 7.3 Hz, 3H, Me<sup>2</sup>), 0.83 (t, *J* = 7.4 Hz, 3H, Me<sup>1</sup>); <sup>13</sup>C NMR (151 MHz, C<sub>6</sub>D<sub>6</sub>) δ 172.3 (C), 133.9 (CH), 128.1 (CH), 86.6 (CH), 85.9 (CH), 65.6 (C), 50.9 (CH<sub>3</sub>), 46.6 (CH<sub>2</sub> × 2), 34.8 (CH<sub>2</sub>), 32.8 (CH<sub>2</sub>), 32.7 (CH<sub>2</sub>), 32.2 (CH<sub>2</sub>), 25.6 (CH<sub>2</sub>), 24.2 (CH<sub>2</sub> × 2), 22.9 (CH<sub>2</sub>), 22.3 (CH<sub>2</sub>), 14.2 (CH<sub>3</sub>), 13.8 (CH<sub>3</sub>); HRMS-EI calcd for C<sub>20</sub>H<sub>35</sub>NO<sub>3</sub>, 337.2617 found 337.2608.

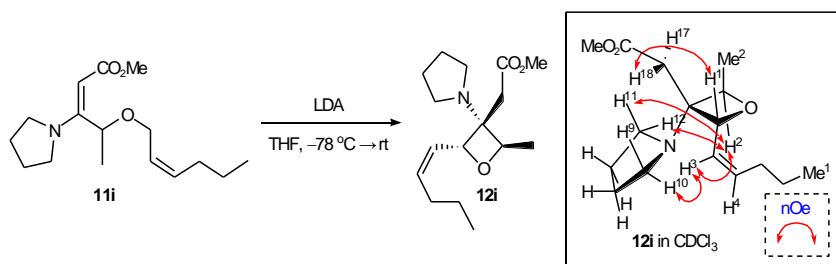

**Synthesis of [(2*R*,3*R*,4*R*)-2-methyl-4-(*Z*)-pent-1-enyl-3-pyrrolidin-1-yl-oxetan-3-yl]-acetic acid methyl ester (12i).** Prepared according to the representative procedure with compound **11i** (210 mg, 0.75 mmol) and LDA to give oxetane **12i** (130 mg, 0.46 mmol) as a pale-yellow oil in 62% yield. *R<sub>f</sub>* = 0.28 (SiO<sub>2</sub>, 4:1 *v/v*, *n*-hexane/EtOAc); FT-IR (neat)  $\nu$  2961, 2930, 2873, 1736, 1461, 1440, 1266, 1198, 1141, 1066, 942 cm<sup>-1</sup>; <sup>1</sup>H NMR (300 MHz, CDCl<sub>3</sub>) δ 6.12 (ddt, *J* = 11.1, 9.7, 1.5 Hz, 1H, H<sup>3</sup>), 5.66 (dt, *J* = 11.1, 7.5 Hz, 1H, H<sup>4</sup>), 5.43 (d, *J* = 9.7 Hz, 1H, H<sup>1</sup>), 4.89 (q, *J* = 6.5 Hz, 1H, H<sup>2</sup>), 3.66 (s, 3H, OMe), 2.77 (s, 2H, H<sup>17</sup> and H<sup>18</sup>), 2.62–2.58 (m, 2H, H<sup>10</sup> and H<sup>12</sup>), 2.46–2.42 (m, 2H, H<sup>9</sup> and H<sup>11</sup>), 2.21–2.08 (m, 2H, H<sup>5</sup> and H<sup>6</sup>), 1.68–1.62 (m, 4H, H<sup>13</sup>–H<sup>16</sup>), 1.43–1.36 (m, 2H, H<sup>7</sup> and H<sup>8</sup>), 1.28 (d, *J* = 6.5 Hz, 3H, Me<sup>2</sup>), 0.92 (t, *J* = 7.3 Hz, 3H, Me<sup>1</sup>); <sup>13</sup>C NMR (75 MHz, CDCl<sub>3</sub>) δ 172.9 (C), 134.6 (CH), 126.9 (CH), 82.9 (CH), 80.6 (CH), 65.1 (C), 51.6 (CH<sub>3</sub>), 45.8 (CH<sub>2</sub> × 2), 32.1 (CH<sub>2</sub>), 29.4 (CH<sub>2</sub>), 23.7 (CH<sub>2</sub> × 2), 22.8 (CH<sub>2</sub>), 17.6 (CH<sub>3</sub>), 13.8 (CH<sub>3</sub>); HRMS-EI calcd for C<sub>16</sub>H<sub>27</sub>NO<sub>3</sub>, 281.1991 found 281.1984.

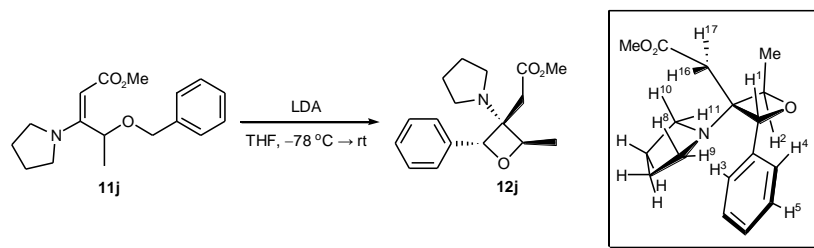

**Synthesis of [(2*R*,3*R*,4*R*)-2-methyl-4-phenyl-3-pyrrolidin-1-yl-oxetan-3-yl]-acetic acid methyl ester (**12j**).** Prepared according to the representative procedure with compound **11j** (220 mg, 0.76 mmol) and LDA to give oxetane **12j** (176 mg, 0.61 mmol) as a colorless oil in 80% yield.  $R_f = 0.47$  (SiO<sub>2</sub>, 4:1 v/v, *n*-hexane/EtOAc); **FT-IR** (neat)  $\nu$  2966, 2874, 2809, 1735, 1711, 1602, 1558, 1541, 1588, 1460, 1435, 1379, 1333, 1264, 1196, 1178, 1140, 1069, 983, 890, 747, 697 cm<sup>-1</sup>; **<sup>1</sup>H NMR (300 MHz, CDCl<sub>3</sub>)**  $\delta$  7.58 (d,  $J = 7.5$  Hz, 2H, H<sup>3</sup> and H<sup>4</sup>), 7.36–7.28 (m, 3H, H<sup>5</sup>, H<sup>6</sup> and H<sup>7</sup>), 5.82 (s, 1H, H<sup>1</sup>), 5.08 (q,  $J = 6.4$  Hz, 1H, H<sup>2</sup>), 3.69 (s, 3H, OMe), 2.93 (ABq,  $J = 15.1$  Hz, 1H, H<sup>16</sup>), 2.83 (ABq,  $J = 15.1$  Hz, 1H, H<sup>17</sup>), 2.25 (br, 2H, H<sup>8</sup> and H<sup>10</sup>), 2.17 (br, 2H, H<sup>9</sup> and H<sup>11</sup>), 1.41 (d,  $J = 6.4$  Hz, 3H, Me), 1.42–1.38 (m, 4H, H<sup>12</sup>–H<sup>15</sup>); **<sup>13</sup>C NMR (75 MHz, CDCl<sub>3</sub>)**  $\delta$  172.6 (C), 139.3 (C), 127.6 (CH  $\times$  3), 127.4 (CH  $\times$  2), 87.5 (CH), 82.7 (CH), 65.6 (C), 51.6 (CH<sub>3</sub>), 45.8 (CH<sub>2</sub>  $\times$  2), 33.5 (CH<sub>2</sub>), 23.6 (CH<sub>2</sub>  $\times$  2), 18.2 (CH<sub>3</sub>); HRMS-EI calcd for C<sub>17</sub>H<sub>23</sub>NO<sub>3</sub>, 289.1678 found 289.1685.

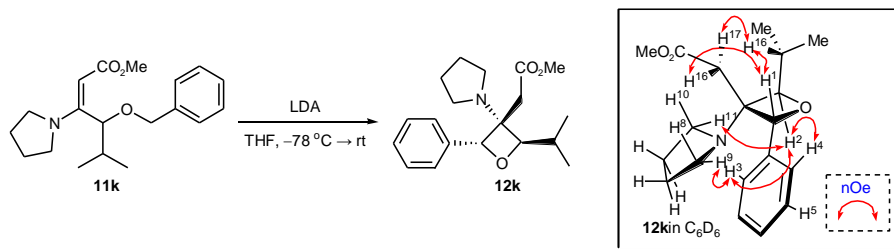

**Synthesis of [(2*R*,3*R*,4*R*)-2-isopropyl-4-phenyl-3-pyrrolidin-1-yl-oxetan-3-yl]-acetic acid methyl ester (**12k**).** Prepared according to the representative procedure with compound **11k** (240 mg, 0.76 mmol) and LDA to give oxetane **12k** (204 mg, 0.64 mmol) as a colorless oil in 85% yield.  $R_f = 0.53$  (SiO<sub>2</sub>, 4:1 v/v, *n*-hexane/EtOAc); **FT-IR** (neat)  $\nu$  2959, 2872, 2808, 1735, 1717, 1698, 1684, 1653, 1558, 1541, 1521, 1496, 1472, 1457, 1436, 1387, 1363, 1339, 1314, 1259, 1195, 1176, 1154, 1120, 1095, 1053, 1001, 934, 892, 750, 698 cm<sup>-1</sup>; **<sup>1</sup>H NMR (300 MHz, CDCl<sub>3</sub>)**  $\delta$  7.62 (d,  $J = 7.5$  Hz, 2H, H<sup>3</sup> and H<sup>4</sup>), 7.34–7.25 (m, 3H, H<sup>5</sup>, H<sup>6</sup> and H<sup>7</sup>), 5.82 (s, 1H, H<sup>1</sup>), 4.37 (d,  $J = 10.5$  Hz, 1H, H<sup>2</sup>), 3.69 (s, 3H, OMe), 2.98 (ABq,  $J = 15.3$  Hz, 1H, H<sup>16</sup>), 2.88 (ABq,  $J = 15.3$



Hz, 1H, H<sup>17</sup>), 2.24–2.20 (m, 2H, H<sup>8</sup> and H<sup>10</sup>), 2.11–2.04 (m, 3H, H<sup>9</sup>, H<sup>11</sup> and H<sup>18</sup>), 1.46–1.31 (m, 4H, H<sup>12</sup>–H<sup>15</sup>), 1.13 (d, *J* = 6.4 Hz, 3H, Me), 0.87 (d, *J* = 6.4 Hz, 3H, Me); <sup>13</sup>C NMR (75 MHz, CDCl<sub>3</sub>) δ 172.7 (C), 139.7 (C), 128.1 (CH × 2), 127.4 (CH), 127.3 (CH × 2), 91.9 (CH), 86.0 (CH), 65.4 (C), 51.6 (CH<sub>3</sub>), 46.1 (CH<sub>2</sub> × 2), 32.6 (CH<sub>2</sub>), 30.7 (CH), 23.4 (CH<sub>2</sub> × 2), 18.5 (CH<sub>3</sub> × 2); <sup>1</sup>H NMR (600 MHz, C<sub>6</sub>D<sub>6</sub>) δ 7.92 (d, *J* = 7.3 Hz, 2H, H<sup>3</sup> and H<sup>4</sup>), 7.25 (dd, *J* = 7.6, 7.3 Hz, 2H, H<sup>5</sup> and H<sup>7</sup>), 7.15–7.13 (m, 1H, H<sup>6</sup>), 6.03 (s, 1H, H<sup>1</sup>), 4.34 (d, *J* = 10.4 Hz, 1H, H<sup>2</sup>), 3.31 (s, 3H, OMe), 2.72 (s, 2H, H<sup>16</sup> and H<sup>17</sup>), 2.20–2.15 (m, 4H, H<sup>8</sup>–H<sup>11</sup>), 1.84–1.78 (m, 1H, H<sup>18</sup>), 1.28–1.19 (m, 4H, H<sup>12</sup>–H<sup>15</sup>), 1.10 (d, *J* = 6.6 Hz, 3H, Me), 0.60 (d, *J* = 6.7 Hz, 3H, Me); <sup>13</sup>C NMR (151 MHz, C<sub>6</sub>D<sub>6</sub>) δ 172.3 (C), 140.9 (C), 128.5 (CH × 2), 127.6 (CH), 127.5 (CH × 2), 91.4 (CH), 86.2 (CH), 65.9 (C), 51.0 (CH<sub>3</sub>), 46.5 (CH<sub>2</sub> × 2), 33.1 (CH<sub>2</sub>), 30.9 (CH), 23.7 (CH<sub>2</sub> × 2), 18.7 (CH<sub>3</sub>), 18.5 (CH<sub>3</sub>); HRMS-EI calcd for C<sub>19</sub>H<sub>27</sub>NO<sub>3</sub>, 317.1991 found 317.1999.

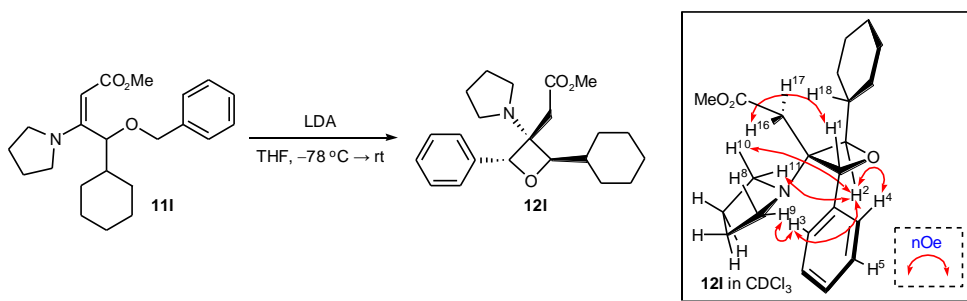

**Synthesis of [(2*R*,3*R*,4*R*)-2-cyclohexyl-4-phenyl-3-pyrrolidin-1-yl-oxetan-3-yl]-acetic acid methyl ester (**121**).** Prepared according to the representative procedure with compound **111** (260 mg, 0.73 mmol) and LDA to give oxetane **121** (214 mg, 0.60 mmol) as a pale-yellow oil in 82% yield. *R<sub>f</sub>* = 0.47 (SiO<sub>2</sub>, 4:1 *v/v*, *n*-hexane/EtOAc); FT-IR (neat)  $\nu$  2925, 2851, 2806, 1735, 1699, 1684, 1559, 1450, 1436, 1338, 1263, 1194, 1174, 1154, 1131, 1030, 996, 887, 752, 698 cm<sup>-1</sup>; <sup>1</sup>H NMR (500 MHz, CDCl<sub>3</sub>) δ 7.62 (dd, *J* = 8.2, 1.5 Hz, 2H, H<sup>3</sup> and H<sup>4</sup>), 7.32–7.25 (m, 3H, H<sup>5</sup>, H<sup>6</sup> and H<sup>7</sup>), 5.81 (s, 1H, H<sup>1</sup>), 4.47 (d, *J* = 10.5 Hz, 1H, H<sup>2</sup>), 3.69 (s, 3H, OMe), 3.00 (ABq, *J* = 15.3 Hz, 1H, H<sup>16</sup>), 2.89 (ABq, *J* = 15.3 Hz, 1H, H<sup>17</sup>), 2.22–2.18 (m, 2H, H<sup>8</sup> and H<sup>10</sup>), 2.11–2.05 (m, 3H, H<sup>9</sup>, H<sup>11</sup> and H<sup>19</sup>), 1.78–1.69 (m, 4H, H<sup>18</sup>, H<sup>21</sup>, H<sup>22</sup> and H<sup>26</sup>), 1.58–1.56 (m, 1H, H<sup>28</sup>), 1.45–1.42 (m, 2H, H<sup>12</sup> and H<sup>13</sup>), 1.35–1.21 (m, 5H, H<sup>14</sup>, H<sup>15</sup>, H<sup>23</sup>, H<sup>24</sup> and H<sup>25</sup>), 0.94–0.90 (m, 2H, H<sup>19</sup> and H<sup>27</sup>); <sup>13</sup>C NMR (126 MHz, CDCl<sub>3</sub>) δ 172.8 (C), 139.7 (C), 128.1 (CH × 2), 127.4 (CH), 127.3 (CH × 2), 90.6 (CH), 86.3 (CH), 65.6 (C), 51.6 (CH<sub>3</sub>), 46.2 (CH<sub>2</sub> × 2), 40.5 (CH), 32.7 (CH<sub>2</sub>), 29.0 (CH<sub>2</sub>), 28.3 (CH<sub>2</sub>), 26.4 (CH<sub>2</sub>), 25.5 (CH<sub>2</sub> × 2), 23.4 (CH<sub>2</sub> × 2); HRMS-EI calcd for

C<sub>22</sub>H<sub>31</sub>NO<sub>3</sub>, 357.2304 found 357.2312.

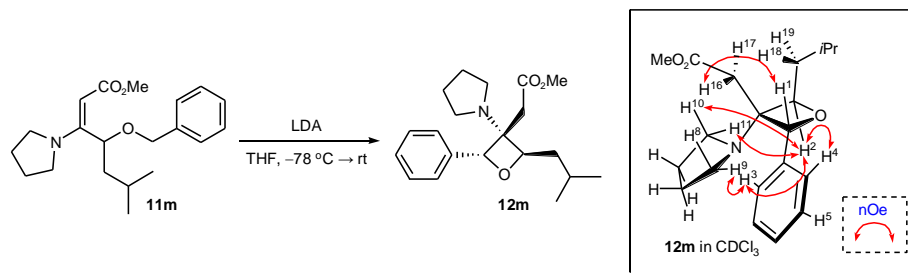

**Synthesis of [(2*R*,3*R*,4*R*)-2-isobutyl-4-phenyl-3-pyrrolidin-1-yl-oxetan-3-yl]-acetic acid methyl ester (**12m**).** Prepared according to the representative procedure with compound **11m** (250 mg, 0.76 mmol) and LDA to give oxetane **12m** (198 mg, 0.60 mmol) as a pale-yellow oil in 79% yield.  $R_f = 0.51$  (SiO<sub>2</sub>, 4:1 v/v, *n*-hexane/EtOAc); **FT-IR** (neat)  $\nu$  2954, 2930, 2807, 1734, 1717, 1699, 1653, 1617, 1558, 1541, 1507, 1489, 1457, 1435, 1363, 1339, 1260, 1196, 1176, 1147, 1075, 1030, 985, 892, 884, 750, 698 cm<sup>-1</sup>; **<sup>1</sup>H NMR (300 MHz, CDCl<sub>3</sub>)**  $\delta$  7.52 (d,  $J = 7.5$  Hz, 2H, H<sup>3</sup> and H<sup>4</sup>), 7.25–7.18 (m, 3H, H<sup>5</sup>, H<sup>6</sup> and H<sup>7</sup>), 5.74 (s, 1H, H<sup>1</sup>), 4.90 (dd,  $J = 9.9, 2.9$  Hz, 1H, H<sup>2</sup>), 3.62 (s, 3H, OMe), 2.86 (ABq,  $J = 15.2$  Hz, 1H, H<sup>16</sup>), 2.72 (ABq,  $J = 15.2$  Hz, 1H, H<sup>17</sup>), 2.19–2.14 (m, 2H, H<sup>8</sup> and H<sup>10</sup>), 2.10–2.06 (m, 2H, H<sup>9</sup> and H<sup>11</sup>), 1.77–1.69 (m, 1H, H<sup>20</sup>), 1.68–1.64 (m, 1H, H<sup>18</sup>), 1.39–1.24 (m, 5H, H<sup>19</sup> and H<sup>12</sup>–H<sup>15</sup>), 0.92 (d,  $J = 6.4$  Hz, 3H, Me), 0.91 (d,  $J = 6.4$  Hz, 3H, Me); **<sup>13</sup>C NMR (75 MHz, CDCl<sub>3</sub>)**  $\delta$  172.7 (C), 139.6 (C), 127.8 (CH  $\times$  2), 127.5 (CH), 127.4 (CH  $\times$  2), 87.4 (CH), 85.2 (CH), 65.6 (C), 51.6 (CH<sub>3</sub>), 45.8 (CH<sub>2</sub>  $\times$  2), 41.6 (CH<sub>2</sub>), 33.2 (CH<sub>2</sub>), 24.9 (CH), 23.6 (CH<sub>2</sub>  $\times$  2), 23.4 (CH<sub>3</sub>), 22.3 (CH<sub>3</sub>); **HRMS-EI** calcd for C<sub>20</sub>H<sub>29</sub>NO<sub>3</sub>, 331.2147 found 331.2140.

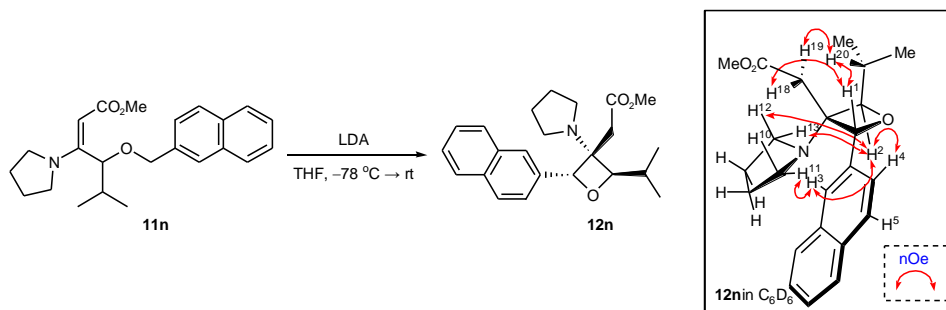

**Synthesis of [(2*R*,3*R*,4*R*)-2-isopropyl-4-naphthalen-2-yl-3-pyrrolidin-1-yl-oxetan-3-yl]-acetic acid methyl ester (**12n**).** Prepared according to the representative procedure with compound **11n** (270 mg, 0.74 mmol) and LDA to give oxetane **12n** (176 mg, 0.48 mmol) as a

pale-yellow oil in 65% yield.  $R_f = 0.55$  (SiO<sub>2</sub>, 4:1 v/v, *n*-hexane/EtOAc); **FT-IR** (neat)  $\nu$  2959, 2872, 2808, 1735, 1631, 1601, 1509, 1461, 1435, 1365, 1332, 1262, 1195, 1175, 1154, 1125, 1053, 1001, 966, 952, 890, 857, 813, 745 cm<sup>-1</sup>; **<sup>1</sup>H NMR (300 MHz, CDCl<sub>3</sub>)**  $\delta$  8.05 (s, 1H, H<sup>3</sup>), 7.89–7.78 (m, 4H, H<sup>4</sup>, H<sup>5</sup>, H<sup>6</sup> and H<sup>9</sup>), 7.47–7.44 (m, 2H, H<sup>7</sup> and H<sup>8</sup>), 6.01 (s, 1H, H<sup>1</sup>), 4.37 (d,  $J = 10.2$  Hz, 1H, H<sup>2</sup>), 3.72 (s, 3H, OMe), 3.05 (ABq,  $J = 15.3$  Hz, 1H, H<sup>18</sup>), 2.95 (ABq,  $J = 15.3$  Hz, 1H, H<sup>19</sup>), 2.26 (br, 2H, H<sup>10</sup> and H<sup>12</sup>), 2.16–2.06 (m, 3H, H<sup>11</sup>, H<sup>13</sup> and H<sup>20</sup>), 1.39–1.28 (m, 4H, H<sup>14</sup>–H<sup>17</sup>), 1.08 (d,  $J = 6.6$  Hz, 3H, Me), 0.91 (d,  $J = 6.6$  Hz, 3H, Me); **<sup>13</sup>C NMR (75 MHz, CDCl<sub>3</sub>)**  $\delta$  172.7 (C), 137.4 (C), 133.0 (C), 132.8 (C), 128.2 (CH), 127.5 (CH), 126.9 (CH), 126.7 (CH), 126.3 (CH), 125.6 (CH), 125.5 (CH), 91.9 (CH), 86.2 (CH), 65.8 (C), 51.6 (CH<sub>3</sub>), 46.3 (CH<sub>2</sub> × 2), 32.9 (CH<sub>2</sub>), 30.8 (CH), 23.5 (CH<sub>2</sub> × 2), 18.5 (CH<sub>3</sub> × 2); **<sup>1</sup>H NMR (600 MHz, C<sub>6</sub>D<sub>6</sub>)**  $\delta$  8.38 (s, 1H, H<sup>3</sup>), 8.16 (dd,  $J = 8.7, 1.6$  Hz, 1H, H<sup>4</sup>), 7.75–7.74 (m, 2H, H<sup>5</sup> and H<sup>9</sup>), 7.66–7.64 (m, 1H, H<sup>6</sup>), 7.24–7.21 (m, 2H, H<sup>7</sup> and H<sup>8</sup>), 6.21 (s, 1H, H<sup>1</sup>), 4.45 (d,  $J = 10.5$  Hz, 1H, H<sup>2</sup>), 3.35 (s, 3H, OMe), 2.76 (ABq,  $J = 14.9$  Hz, 1H, H<sup>18</sup>), 2.75 (ABq,  $J = 14.9$  Hz, 1H, H<sup>19</sup>), 2.78–2.14 (m, 4H, H<sup>10</sup>–H<sup>13</sup>), 1.89–1.83 (m, 1H, H<sup>20</sup>), 1.17–1.14 (m, 2H, H<sup>14</sup>–H<sup>15</sup>), 1.14 (d,  $J = 6.4$  Hz, 3H, Me), 1.12–1.08 (m, 2H, H<sup>16</sup>–H<sup>17</sup>), 0.62 (d,  $J = 6.6$  Hz, 3H, Me); **<sup>13</sup>C NMR (151 MHz, C<sub>6</sub>D<sub>6</sub>)**  $\delta$  172.3 (C), 138.8 (C), 133.6 (C), 133.5 (C), 128.5 (CH), 127.9 (CH), 127.3 (CH), 127.1 (CH), 126.9 (CH), 125.9 (CH), 125.8 (CH), 91.5 (CH), 86.5 (CH), 66.2 (C), 51.1 (CH<sub>3</sub>), 46.6 (CH<sub>2</sub> × 2), 33.2 (CH<sub>2</sub>), 30.9 (CH), 23.7 (CH<sub>2</sub> × 2), 18.7 (CH<sub>3</sub>), 18.5 (CH<sub>3</sub>); **HRMS-EI** calcd for C<sub>23</sub>H<sub>29</sub>NO<sub>3</sub>, 367.2147 found 367.2141.

### General procedure for the Cope elimination reaction

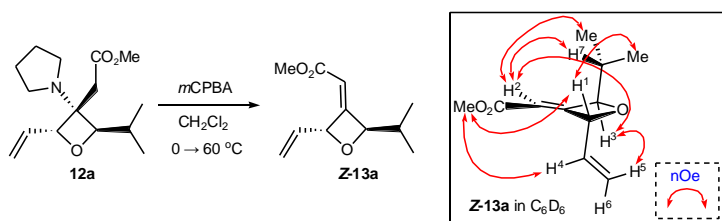

**Synthesis of (Z)-[(2*R*,4*R*)-2-isopropyl-4-vinyl-oxetan-3-(*Z*)-ylidene]-acetic acid methyl ester (**E-13a**). *m*-CPBA (77%; 100 mg, 4.49 mmol, 1.2 equiv.) was added at 0 °C to an oxetane **12a** (100 mg, 3.74 mmol, 1.0 equiv.) in a 10 mL flask with CH<sub>2</sub>Cl<sub>2</sub> (4.0 mL). The mixture was stirred for 30 minutes at 0 °C, and then heated to 60 °C for an additional 30 minutes by switching the ice/water bath to an oil bath. The reaction was quenched by the addition of saturated sodium**

thiosulfate (2.0 mL) and washed with saturated sodium bicarbonate (3 mL  $\times$  2), extracted with CH<sub>2</sub>Cl<sub>2</sub> (3 mL  $\times$  2). The combined organic layer was washed with brine, and dried over anhydrous sodium sulfate, followed by concentration to afford the crude material. Purification by flash column chromatography (*n*-hexane/EtOAc, 10:1) to provide a single diastereomer **Z-13a** (66 mg, 3.37 mmol) as colorless oil in 90% yield.  $R_f = 0.56$  (SiO<sub>2</sub>, 4:1 *v/v*, *n*-hexane/EtOAc); **FT-IR** (neat)  $\nu$  2962, 2931, 2874, 1724, 1699, 1653, 1636, 1558, 1541, 1533, 1457, 1436, 1397, 1386, 1363, 1341, 1269, 1219, 1197, 1102, 1032, 1008, 970, 926, 906, 890 cm<sup>-1</sup>; **<sup>1</sup>H NMR (300 MHz, CDCl<sub>3</sub>)**  $\delta$  6.22 (ddd,  $J = 15.8, 10.2, 5.2$  Hz, 1H, H<sup>4</sup>), 5.74 (br, 1H, H<sup>1</sup>), 5.66 (dd,  $J = 2.5, 2.1$  Hz, 1H, H<sup>2</sup>), 5.52 (dd,  $J = 15.8, 1.3$  Hz, 1H, H<sup>5</sup>), 5.29 (dd,  $J = 10.2, 1.3$  Hz, 1H, H<sup>6</sup>), 5.03 (ddd,  $J = 6.4, 4.6, 2.1$  Hz, 1H, H<sup>3</sup>), 3.70 (s, 3H, OMe), 2.05–1.96 (m, 1H, H<sup>7</sup>), 1.02 (d,  $J = 6.8$  Hz, 3H, Me), 0.99 (d,  $J = 6.8$  Hz, 3H, Me); **<sup>13</sup>C NMR (75 MHz, CDCl<sub>3</sub>)**  $\delta$  165.0 (C), 163.5 (C), 134.1 (CH), 116.5 (CH<sub>2</sub>), 110.7 (CH), 90.5 (CH), 86.7 (CH), 51.2 (CH<sub>3</sub>), 32.9 (CH), 16.9 (CH<sub>3</sub>), 16.8 (CH<sub>3</sub>); **<sup>1</sup>H NMR (600 MHz, C<sub>6</sub>D<sub>6</sub>)**  $\delta$  6.47 (ddd,  $J = 17.1, 10.5, 4.6$  Hz, 1H, H<sup>4</sup>), 5.86 (br, 1H, H<sup>1</sup>), 5.71 (ddd,  $J = 17.1, 1.8, 1.5$  Hz, 1H, H<sup>5</sup>), 5.51 (dd,  $J = 2.6, 2.1$  Hz, 1H, H<sup>2</sup>), 5.21 (ddd,  $J = 10.5, 1.8, 1.7$  Hz, 1H, H<sup>6</sup>), 4.71 (ddd,  $J = 6.5, 4.6, 2.1$  Hz, 1H, H<sup>3</sup>), 3.30 (s, 3H, OMe), 1.69 (qqd,  $J = 6.8, 6.8, 6.5$  Hz, 1H, H<sup>7</sup>), 0.84 (d,  $J = 6.8$  Hz, 3H, Me), 0.76 (d,  $J = 6.8$  Hz, 3H, Me); **<sup>13</sup>C NMR (151 MHz, C<sub>6</sub>D<sub>6</sub>)**  $\delta$  164.8 (C), 164.4 (C), 134.9 (CH), 115.3 (CH<sub>2</sub>), 110.7 (CH), 90.3 (CH), 86.6 (CH), 50.8 (CH<sub>3</sub>), 33.2 (CH), 17.0 (CH<sub>3</sub>), 16.9 (CH<sub>3</sub>); **HRMS-EI** calcd for C<sub>11</sub>H<sub>16</sub>O<sub>3</sub>, 196.1099 found 196.1105.

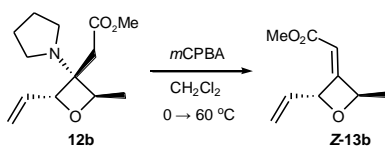

**(Z)-[(2R,4R)-2-methyl-4-vinyl-oxetan-3-(Z)-ylidene]-acetic acid methyl ester (Z-13b).**

According to the general procedure, oxetane **12b** (90 mg, 3.76 mmol) was reacted to give a single diastereomer **Z-13b** (56 mg, 3.31 mmol) as a pale-yellow oil in 88% yield.  $R_f = 0.40$  (SiO<sub>2</sub>, 4:1 *v/v*, *n*-hexane/EtOAc); **FT-IR** (neat)  $\nu$  2981, 2937, 1726, 1658, 1641, 1439, 1402, 1371, 1221, 1166, 1097, 1077, 1023, 954, 885 cm<sup>-1</sup>; **<sup>1</sup>H NMR (300 MHz, CDCl<sub>3</sub>)**  $\delta$  6.22 (ddd,  $J = 17.1, 10.4, 5.1$  Hz, 1H, H<sup>4</sup>), 5.86 (br, 1H, H<sup>1</sup>), 5.59 (dd,  $J = 2.5, 2.1$  Hz, 1H, H<sup>2</sup>), 5.53 (dd,  $J = 17.1, 1.6$  Hz, 1H, H<sup>5</sup>), 5.44–5.40 (m, 1H, H<sup>3</sup>), 5.29 (dd,  $J = 10.4, 1.5$  Hz, 1H, H<sup>6</sup>), 3.71 (s, 3H, OMe), 1.50 (d,  $J = 6.5$  Hz, 3H, Me); **<sup>13</sup>C NMR (75 MHz, CDCl<sub>3</sub>)**  $\delta$  165.4 (C), 165.2 (C), 133.9

(CH), 116.2 (CH<sub>2</sub>), 110.2 (CH), 86.9 (CH), 82.6 (CH), 51.4 (CH<sub>3</sub>), 21.0 (CH<sub>3</sub>); **HRMS-EI** calcd for C<sub>9</sub>H<sub>12</sub>O<sub>3</sub>, 168.0786 found 168.0791.

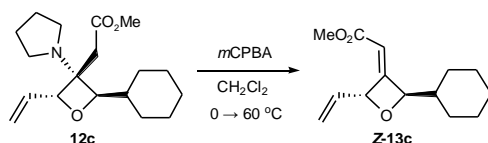

**(Z)-[(2R,4R)-2-cyclohexyl-4-vinyl-oxetan-3-(Z)-ylidene]-acetic acid methyl ester (Z-13c).**

According to the general procedure, oxetane **12c** (110 mg, 3.60 mmol) was reacted to give a single diastereomer **Z-13c** (77 mg, 3.28 mmol) as a pale-yellow oil in 91% yield. **R<sub>f</sub>** = 0.58 (SiO<sub>2</sub>, 4:1 v/v, *n*-hexane/EtOAc); **FT-IR** (neat)  $\nu$  3049, 2926, 2854, 1724, 1699, 1653, 1638, 1558, 1541, 1508, 1449, 1436, 1341, 1268, 1218, 1197, 1144, 1114, 1087, 1024, 1001, 988, 968, 924, 890, 749 cm<sup>-1</sup>; **<sup>1</sup>H NMR (300 MHz, CDCl<sub>3</sub>)**  $\delta$  6.21 (ddd, *J* = 17.1, 10.4, 5.0 Hz, 1H, H<sup>4</sup>), 5.73 (ddd, *J* = 5.0, 4.5, 2.5 Hz, 1H, H<sup>1</sup>), 5.65 (dd, *J* = 2.5, 2.1 Hz, 1H, H<sup>2</sup>), 5.50 (dd, *J* = 17.1, 1.6 Hz, 1H, H<sup>5</sup>), 5.28 (dd, *J* = 10.4, 1.6 Hz, 1H, H<sup>6</sup>), 5.04 (ddd, *J* = 6.5, 4.5, 2.1 Hz, 1H, H<sup>3</sup>), 3.70 (s, 3H, OMe), 1.80–1.67 (m, 5H, H<sup>7</sup>–H<sup>9</sup>, H<sup>16</sup> and H<sup>17</sup>), 1.24–0.90 (m, 6H, H<sup>10</sup>–H<sup>15</sup>); **<sup>13</sup>C NMR (75 MHz, CDCl<sub>3</sub>)**  $\delta$  165.1 (C), 163.7 (C), 134.2 (CH), 116.5 (CH<sub>2</sub>), 110.7 (CH), 89.9 (CH), 86.9 (CH), 51.2 (CH<sub>3</sub>), 42.7 (CH), 29.6 (CH<sub>2</sub>), 27.3 (CH<sub>2</sub>), 27.1 (CH<sub>2</sub>), 25.7 (CH<sub>2</sub>), 25.6 (CH<sub>2</sub>); **<sup>1</sup>H NMR (600 MHz, C<sub>6</sub>D<sub>6</sub>)**  $\delta$  6.50 (ddd, *J* = 17.0, 10.3, 4.4 Hz, 1H, H<sup>4</sup>), 5.88 (br, m, 1H, H<sup>1</sup>), 5.73 (ddd, *J* = 17.0, 1.7, 1.4 Hz, 1H, H<sup>5</sup>), 5.54 (dd, *J* = 2.6, 2.1 Hz, 1H, H<sup>2</sup>), 5.22 (dd, *J* = 10.3, 1.9, 1.4 Hz, 1H, H<sup>6</sup>), 4.76 (ddd, *J* = 6.4, 4.5, 2.1 Hz, 1H, H<sup>3</sup>), 3.31 (s, 3H, OMe), 1.80–1.78 (m, 1H, H<sup>8</sup>), 1.61–1.51 (m, 4H, H<sup>9</sup>, H<sup>10</sup>, H<sup>16</sup> and H<sup>17</sup>), 1.48–1.42 (m, 1H, H<sup>7</sup>), 1.09–0.90 (m, 5H, H<sup>11</sup>–H<sup>15</sup>); **<sup>13</sup>C NMR (151 MHz, C<sub>6</sub>D<sub>6</sub>)**  $\delta$  164.9 (C), 164.6 (C), 135.0 (CH), 115.4 (CH<sub>2</sub>), 110.6 (CH), 89.6 (CH), 86.8 (CH), 50.8 (CH<sub>3</sub>), 42.9 (CH), 27.6 (CH<sub>2</sub>), 27.3 (CH<sub>2</sub>), 26.5 (CH<sub>2</sub>), 26.0 (CH<sub>2</sub>), 25.9 (CH<sub>2</sub>); **HRMS-EI** calcd for C<sub>14</sub>H<sub>20</sub>O<sub>3</sub>, 236.1412 found 236.1411.

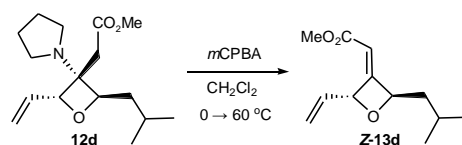

**(Z)-[(2R,4R)-2-isobutyl-4-vinyl-oxetan-3-(Z)-ylidene]-acetic acid methyl ester (Z-13d).**

According to the general procedure, oxetane **12d** (100 mg, 3.55 mmol) was reacted to give a single diastereomer **Z-13d** (67 mg, 3.20 mmol) as a pale-yellow oil in 90% yield. **R<sub>f</sub>** = 0.57

(SiO<sub>2</sub>, 4:1 v/v, *n*-hexane/EtOAc); **FT-IR** (neat)  $\nu$  2965, 2876, 1724, 1699, 1653, 1638, 1559, 1542, 1436, 1341, 1269, 1219, 1197, 1032, 1008, 970, 927, 890 cm<sup>-1</sup>; **<sup>1</sup>H NMR (300 MHz, CDCl<sub>3</sub>)**  $\delta$  6.21 (ddd,  $J = 17.1, 10.4, 5.3$  Hz, 1H, H<sup>4</sup>), 5.81 (br, 1H, H<sup>1</sup>), 5.60 (dd,  $J = 2.5, 2.1$  Hz, 1H, H<sup>2</sup>), 5.52 (ddd,  $J = 17.1, 1.8, 1.6$  Hz, 1H, H<sup>5</sup>), 5.49–5.33 (m, 1H, H<sup>3</sup>), 5.29 (ddd,  $J = 10.4, 1.6, 1.3$  Hz, 1H, H<sup>6</sup>), 3.70 (s, 3H, OMe), 1.89–1.78 (m, 2H, H<sup>7</sup> and H<sup>8</sup>), 1.61–1.51 (m, 1H, H<sup>9</sup>), 0.96 (d,  $J = 6.5$  Hz, 3H, Me), 0.95 (d,  $J = 6.5$  Hz, 3H, Me); **<sup>13</sup>C NMR (75 MHz, CDCl<sub>3</sub>)**  $\delta$  165.2 (C  $\times$  2), 134.0 (CH), 116.4 (CH<sub>2</sub>), 110.1 (CH), 86.9 (CH), 84.9 (CH), 51.3 (CH<sub>3</sub>), 44.5 (CH<sub>2</sub>), 24.5 (CH), 23.0 (CH<sub>3</sub>), 22.3 (CH<sub>3</sub>); HRMS-EI calcd for C<sub>12</sub>H<sub>18</sub>O<sub>3</sub>, 210.1256 found 210.1248.

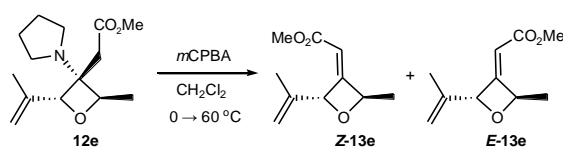

**(Z)- and (E)-[(2*R*,4*R*)-2-isopropenyl-4-methyl-oxetan-3-ylidene]-acetic acid methyl esters (**Z-13e**) and (**E-13e**).** According to the general procedure, oxetane **12e** (90 mg, 3.55 mmol) was reacted to give a 75:25 mixture of diastereomers **Z-13e** and **E-13e** (*d.r.* was determined from the crude <sup>1</sup>H NMR spectrum of the reaction) as a pale-yellow oil in 88% yield (57 mg, 3.13 mmol). **Z-13e:**  $R_f = 0.52$  (SiO<sub>2</sub>, 4:1 v/v, *n*-hexane/EtOAc); **FT-IR** (neat)  $\nu$  2986, 2939, 1736, 1450, 1357, 1227, 1164, 1097, 1055, 954, 885 cm<sup>-1</sup>; **<sup>1</sup>H NMR (300 MHz, CDCl<sub>3</sub>)**  $\delta$  5.59–5.57 (m, 3H, H<sup>1</sup>, H<sup>2</sup> and H<sup>3</sup>), 5.10 (s, 1H, H<sup>4</sup>), 4.98 (s, 1H, H<sup>5</sup>), 3.71 (s, 3H, OMe), 1.82 (s, 3H, Me<sup>1</sup>), 1.64 (d,  $J = 6.6$  Hz, 3H, Me<sup>2</sup>); **<sup>13</sup>C NMR (75 MHz, CDCl<sub>3</sub>)**  $\delta$  165.5 (C), 165.2 (C), 142.3 (C), 113.8 (CH<sub>2</sub>), 110.6 (CH), 88.1 (CH), 84.8 (CH), 51.4 (CH<sub>3</sub>), 19.8 (CH<sub>3</sub>), 17.0 (CH<sub>3</sub>); HRMS-EI calcd for C<sub>10</sub>H<sub>14</sub>O<sub>3</sub>, 182.0943 found 182.0945; **E-13e:**  $R_f = 0.41$  (SiO<sub>2</sub>, 4:1 v/v, *n*-hexane/EtOAc); **FT-IR** (neat)  $\nu$  2985, 2936, 1732, 1684, 1647, 1636, 1456, 1362, 1226, 1170, 1096, 1058, 953, 881 cm<sup>-1</sup>; **<sup>1</sup>H NMR (300 MHz, CDCl<sub>3</sub>)**  $\delta$  5.79 (ddd,  $J = 4.1, 2.5, 0.6$  Hz, 1H, H<sup>1</sup>), 5.68 (dd,  $J = 2.5, 2.3$  Hz, 1H, H<sup>2</sup>), 5.44–5.38 (m, 1H, H<sup>3</sup>), 5.10 (s, 1H, H<sup>4</sup>), 5.04 (s, 1H, H<sup>5</sup>), 3.67 (s, 3H, OMe), 1.88 (s, 3H, Me<sup>1</sup>), 1.50 (d,  $J = 6.5$  Hz, 3H, Me<sup>2</sup>); **<sup>13</sup>C NMR (75 MHz, CDCl<sub>3</sub>)**  $\delta$  165.2 (C), 164.7 (C), 141.6 (C), 115.5 (CH<sub>2</sub>), 111.5 (CH), 90.7 (CH), 82.9 (CH), 51.2 (CH<sub>3</sub>), 21.2 (CH<sub>3</sub>), 17.6 (CH<sub>3</sub>); **HRMS-EI** calcd for C<sub>10</sub>H<sub>14</sub>O<sub>3</sub>, 182.0943 found 182.0945.

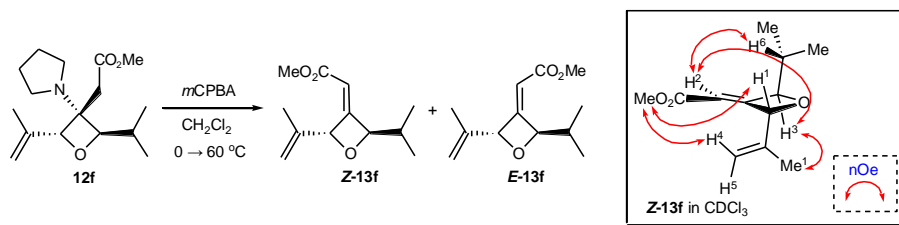

**(Z)- and (E)-[(2R,4R)-2-isopropenyl-4-isopropyl-oxetan-3-ylidene]-acetic acid methyl esters (Z-13f) and (E-13f).** According to the general procedure, oxetane **12f** (100 mg, 3.55 mmol) was reacted to give a 72:28 mixture of diastereomers **Z-13f** and **E-13f** (*d.r.* was determined from the crude  $^1\text{H}$  NMR spectrum of the reaction) as a colorless oil in 85% yield (64 mg, 3.04 mmol). **Z-13f**:  $R_f = 0.53$  (SiO<sub>2</sub>, 4:1 v/v, *n*-hexane/EtOAc); **FT-IR** (neat)  $\nu$  3080, 2963, 2875, 1725, 1699, 1652, 1558, 1541, 1521, 1508, 1472, 1457, 1436, 1363, 1342, 1274, 1219, 1197, 1102, 1039, 1016, 975, 937, 903, 877  $\text{cm}^{-1}$ ;  $^1\text{H}$  NMR (300 MHz, CDCl<sub>3</sub>)  $\delta$  5.73 (dd,  $J = 2.5, 2.1$  Hz, 1H, H<sup>2</sup>), 5.68 (dd,  $J = 4.4, 2.5$  Hz, 1H, H<sup>1</sup>), 5.07 (s, 1H, H<sup>4</sup>), 5.03 (s, 1H, H<sup>5</sup>), 4.98 (ddd,  $J = 6.4, 4.4, 2.1$  Hz, 1H, H<sup>3</sup>), 3.65 (s, 3H, OMe), 2.05–1.99 (m, 1H, H<sup>6</sup>), 1.85 (s, 3H, Me<sup>1</sup>), 1.01 (d,  $J = 6.8$  Hz, 3H, Me), 0.99 (d,  $J = 6.8$  Hz, 3H, Me);  $^{13}\text{C}$  NMR (75 MHz, CDCl<sub>3</sub>)  $\delta$  165.0 (C), 162.6 (C), 141.6 (C), 115.9 (CH), 112.0 (CH<sub>2</sub>), 90.9 (CH), 90.7 (CH), 51.0 (CH<sub>3</sub>), 33.1 (CH), 17.2 (CH<sub>3</sub>), 17.0 (CH<sub>3</sub>), 16.8 (CH<sub>3</sub>); **HRMS-EI** calcd for C<sub>12</sub>H<sub>18</sub>O<sub>3</sub>, 210.1256 found 210.1263; **E-13f**:  $R_f = 0.47$  (SiO<sub>2</sub>, 4:1 v/v, *n*-hexane/EtOAc); **FT-IR** (neat)  $\nu$  3078, 2966, 2876, 1725, 1699, 1652, 1558, 1542, 1524, 1457, 1436, 1363, 1343, 1272, 1219, 1197, 1102, 1038, 1016, 976, 935, 903, 879  $\text{cm}^{-1}$ ;  $^1\text{H}$  NMR (300 MHz, CDCl<sub>3</sub>)  $\delta$  5.60 (dd,  $J = 2.4, 2.0$  Hz, 1H, H<sup>2</sup>), 5.42 (br, 1H, H<sup>1</sup>), 5.40–5.37 (m, 1H, H<sup>3</sup>), 5.02 (s, 1H, H<sup>4</sup>), 4.98 (s, 1H, H<sup>5</sup>), 3.70 (s, 3H, OMe), 2.46–2.41 (m, 1H, H<sup>6</sup>), 1.82 (s, 3H, Me<sup>1</sup>), 1.06 (d,  $J = 6.8$  Hz, 3H, Me), 1.02 (d,  $J = 6.8$  Hz, 3H, Me);  $^{13}\text{C}$  NMR (75 MHz, CDCl<sub>3</sub>)  $\delta$  165.3 (C), 163.8 (C), 142.6 (C), 114.2 (CH), 111.2 (CH<sub>2</sub>), 92.8 (CH), 89.3 (CH), 51.3 (CH<sub>3</sub>), 30.3 (CH), 18.2 (CH<sub>3</sub>), 16.9 (CH<sub>3</sub>), 15.5 (CH<sub>3</sub>). **HRMS-EI** calcd for C<sub>12</sub>H<sub>18</sub>O<sub>3</sub>, 210.1256 found 210.1248.

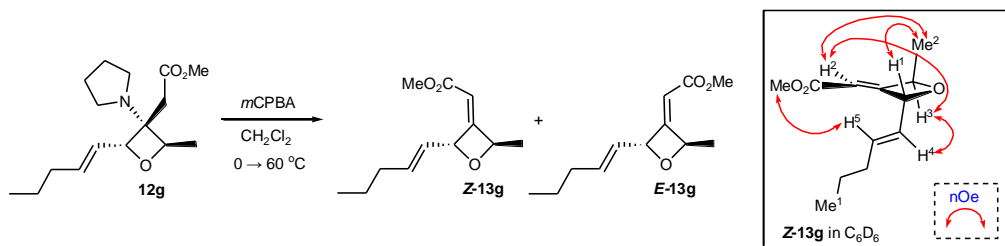

**(Z)- and (E)-[(2R,4R)-2-methyl-4-((E)-pent-1-enyl)-oxetan-3-ylidene]-acetic acid methyl**

ester (**Z-13g**) and (**E-13g**). According to the general procedure, oxetane **12g** (100 mg, 3.55 mmol) was reacted to give a 90:10 mixture of inseparable diastereomers **Z-13g** and **E-13g** (*d.r.* was determined from the crude  $^1\text{H}$  NMR spectrum of the reaction) as a pale-yellow oil in 86% yield (64 mg, 3.04 mmol). **Z-13g**:  $R_f = 0.49$  ( $\text{SiO}_2$ , 4:1 *v/v*, *n*-hexane/EtOAc); **FT-IR** (neat)  $\nu$  2960, 2935, 2874, 1725, 1678, 1658, 1642, 1439, 1352, 1257, 1095, 1030, 923, 883  $\text{cm}^{-1}$ ;  **$^1\text{H}$  NMR (600 MHz,  $\text{C}_6\text{D}_6$ )**  $\delta$  6.05–6.04 (m, 2H,  $\text{H}^4$  and  $\text{H}^5$ ), 5.96 (ddd,  $J = 4.3, 3.2, 2.5$  Hz, 1H,  $\text{H}^1$ ), 5.38 (dd,  $J = 2.5, 2.0$  Hz, 1H,  $\text{H}^2$ ), 5.07 (ddq,  $J = 6.5, 4.3, 2.0$  Hz, 1H,  $\text{H}^3$ ), 3.31 (s, 3H, OMe), 1.99–1.96 (m, 2H,  $\text{H}^6$  and  $\text{H}^7$ ), 1.35–1.29 (m, 2H,  $\text{H}^8$  and  $\text{H}^9$ ), 1.13 (d,  $J = 6.5$  Hz, 3H,  $\text{Me}^2$ ), 0.82 (t,  $J = 7.4$  Hz, 3H,  $\text{Me}^1$ );  **$^{13}\text{C}$  NMR (151 MHz,  $\text{C}_6\text{D}_6$ )**  $\delta$  167.1 (C), 164.9 (C), 132.8 (CH), 127.1 (CH), 109.9 (CH), 86.8 (CH), 81.9 (CH), 50.7 ( $\text{CH}_3$ ), 34.5 ( $\text{CH}_2$ ), 22.6 ( $\text{CH}_2$ ), 21.0 ( $\text{CH}_3$ ), 13.7 ( $\text{CH}_3$ ); **HRMS-EI** calcd for  $\text{C}_{12}\text{H}_{18}\text{O}_3$ , 210.1256 found 210.1261; **E-13g**:  $R_f = 0.49$  ( $\text{SiO}_2$ , 4:1 *v/v*, *n*-hexane/EtOAc);  **$^1\text{H}$  NMR (600 MHz,  $\text{C}_6\text{D}_6$ )**  $\delta$  5.67–5.63 (m, 1H,  $\text{H}^3$ ), 5.55–5.54 (m, 1H,  $\text{H}^4$  and  $\text{H}^5$ ), 5.50 (dd,  $J = 2.5, 2.0$  Hz, 1H,  $\text{H}^2$ ), 5.39–5.38 (m, 1H,  $\text{H}^1$ ), 3.29 (s, 3H, OMe), 1.83–1.79 (m, 2H,  $\text{H}^6$  and  $\text{H}^7$ ), 1.68 (d,  $J = 6.5$  Hz, 3H,  $\text{Me}^2$ ), 1.23–1.18 (m, 2H, 2H,  $\text{H}^8$  and  $\text{H}^9$ ), 0.76 (t,  $J = 7.4$  Hz, 3H,  $\text{Me}^1$ );  **$^{13}\text{C}$  NMR (151 MHz,  $\text{C}_6\text{D}_6$ )**  $\delta$  167.7 (C), 165.0 (C), 135.4 (CH), 128.7 (CH), 110.8 (CH), 85.7 (CH), 84.1 (CH), 50.8 ( $\text{CH}_3$ ), 34.3 ( $\text{CH}_2$ ), 22.2 ( $\text{CH}_2$ ), 20.2 ( $\text{CH}_3$ ), 13.6 ( $\text{CH}_3$ ); **HRMS-EI** calcd for  $\text{C}_{12}\text{H}_{18}\text{O}_3$ , 210.1256 found 210.1261.

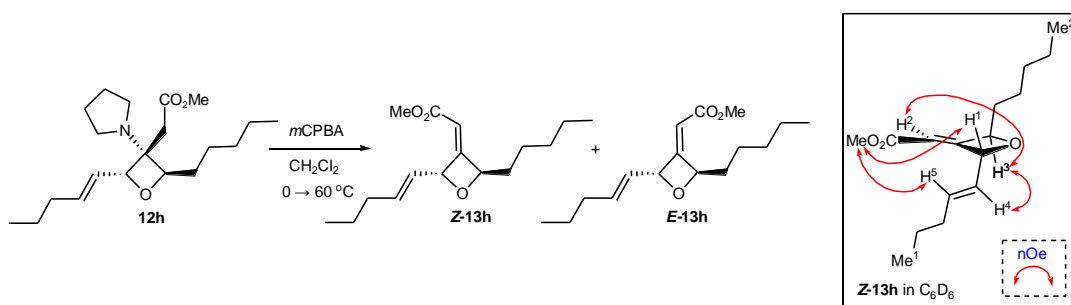

(**Z**)- and (**E**)-[(2*R*,4*R*)-2-pentyl-4-(*E*)-pent-1-enyl]-oxetan-3-ylidene]-acetic acid methyl ester (**Z-13h**) and (**E-13h**). According to the general procedure, oxetane **12h** (120 mg, 3.56 mmol) was reacted to give a 93:7 mixture of inseparable diastereomers **Z-13h** and **E-13h** (*d.r.* was determined from the crude  $^1\text{H}$  NMR spectrum of the reaction) as a pale-yellow oil in 82% yield (78 mg, 2.92 mmol). **Z-13h**:  $R_f = 0.66$  ( $\text{SiO}_2$ , 4:1 *v/v*, *n*-hexane/EtOAc); **FT-IR** (neat)  $\nu$  2957, 2390, 2872, 2861, 1726, 1701, 1461, 1436, 1343, 1267, 1209, 1195, 1126, 1105, 1032, 1022, 973, 925, 900  $\text{cm}^{-1}$ ;  **$^1\text{H}$  NMR (600 MHz,  $\text{C}_6\text{D}_6$ )**  $\delta$  6.12–6.05 (m, 2H,  $\text{H}^4$  and  $\text{H}^5$ ), 5.97 (br,



1H, H<sup>1</sup>), 5.59 (dd,  $J = 2.4, 2.0$  Hz, 1H, H<sup>2</sup>), 5.07–5.04 (m, 1H, H<sup>3</sup>), 3.33 (s, 3H, OMe), 2.00–1.98 (m, 2H, H<sup>6</sup> and H<sup>7</sup>), 1.66–1.60 (m, 1H, H<sup>10</sup>), 1.47–1.43 (m, 1H, H<sup>11</sup>), 1.39–1.27 (m, 5H, H<sup>8</sup>, H<sup>9</sup> and H<sup>12</sup>–H<sup>14</sup>), 1.22–1.14 (m, 3H, H<sup>15</sup>–H<sup>17</sup>), 0.83 (t,  $J = 7.0$  Hz, 3H, Me<sup>1</sup>), 0.82 (t,  $J = 7.3$  Hz, 3H, Me<sup>2</sup>); <sup>13</sup>C NMR (151 MHz, C<sub>6</sub>D<sub>6</sub>)  $\delta$  166.5 (C), 164.9 (C), 132.9 (CH), 127.2 (CH), 110.0 (CH), 86.9 (CH), 85.7 (CH), 50.8 (CH<sub>3</sub>), 35.6 (CH<sub>2</sub>), 34.6 (CH<sub>2</sub>), 31.9 (CH<sub>2</sub>), 24.3 (CH<sub>2</sub>), 22.8 (CH<sub>2</sub>), 22.6 (CH<sub>2</sub>), 14.1 (CH<sub>3</sub>), 13.7 (CH<sub>3</sub>); HRMS-EI calcd for C<sub>16</sub>H<sub>26</sub>O<sub>3</sub>, 266.1882 found 266.1886.

**E-13h**:  $R_f = 0.66$  (SiO<sub>2</sub>, 4:1 v/v, *n*-hexane/EtOAc); <sup>1</sup>H NMR (600 MHz, C<sub>6</sub>D<sub>6</sub>)  $\delta$  5.67–5.64 (m, 1H, H<sup>3</sup>), 5.61–5.54 (m, 3H, H<sup>4</sup>–H<sup>5</sup> and H<sup>3</sup>), 5.39–5.38 (m, 1H, H<sup>1</sup>), 3.31 (s, 3H, OMe), 2.20–2.17 (m, 1H, H<sup>10</sup>), 2.10–2.07 (m, 1H, H<sup>11</sup>), 1.85–1.80 (m, 2H, H<sup>6</sup> and H<sup>7</sup>), 1.37–1.15 (m, 8H, H<sup>8</sup>, H<sup>9</sup> and H<sup>12</sup>–H<sup>17</sup>), 0.90 (t,  $J = 7.3$  Hz, 3H, Me<sup>2</sup>), 0.77 (t,  $J = 7.1$  Hz, 3H, Me<sup>1</sup>); <sup>13</sup>C NMR (151 MHz, C<sub>6</sub>D<sub>6</sub>)  $\delta$  166.9 (C), 165.2 (C), 135.4 (CH), 128.8 (CH), 110.9 (CH), 87.8 (CH), 86.1 (CH), 50.8 (CH<sub>3</sub>), 34.4 (CH<sub>2</sub>), 33.7 (CH<sub>2</sub>), 32.0 (CH<sub>2</sub>), 24.7 (CH<sub>2</sub>), 23.1 (CH<sub>2</sub>), 22.9 (CH<sub>2</sub>), 14.2 (CH<sub>3</sub>), 13.7 (CH<sub>3</sub>); HRMS-EI calcd for C<sub>16</sub>H<sub>26</sub>O<sub>3</sub>, 266.1882 found 266.1886.

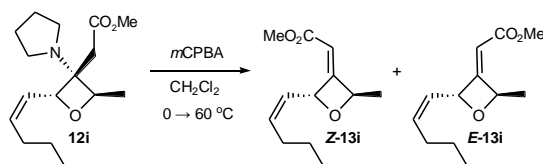

**(Z)- and (E)-[(2R,4R)-2-methyl-4-((Z)-pent-1-enyl)-oxetan-3-ylidene]-acetic acid methyl esters (Z-13i) and (E-13i)**. According to the general procedure, oxetane **12i** (100 mg, 3.55 mmol) was reacted to give a 83:17 mixture of diastereomers **Z-13i** and **E-13i** (*d.r.* was determined from the crude <sup>1</sup>H NMR spectrum of the reaction) as a pale-yellow oil in 80% yield (60 mg, 2.84 mmol). **Z-13i**:  $R_f = 0.47$  (SiO<sub>2</sub>, 4:1 v/v, *n*-hexane/EtOAc); FT-IR (neat)  $\nu$  2961, 2935, 2875, 1740, 1725, 1692, 1658, 1214, 1163, 1095, 1021 cm<sup>-1</sup>; <sup>1</sup>H NMR (300 MHz, CDCl<sub>3</sub>)  $\delta$  6.16 (ddd,  $J = 8.1, 4.3, 2.4$  Hz, 1H, H<sup>4</sup>), 5.73–5.69 (m, 2H, H<sup>5</sup> and H<sup>1</sup>), 5.60 (dd,  $J = 2.5, 2.0$  Hz, 1H, H<sup>2</sup>), 5.44 (ddq,  $J = 6.5, 4.3, 2.0$  Hz, 1H, H<sup>3</sup>), 3.67 (s, 3H, OMe), 2.27–2.10 (m, 2H, H<sup>6</sup> and H<sup>7</sup>), 1.49 (d,  $J = 6.5$  Hz, 3H, Me<sup>2</sup>), 1.44–1.39 (m, 2H, H<sup>8</sup> and H<sup>9</sup>), 0.94 (t,  $J = 7.3$  Hz, 3H, Me<sup>1</sup>); <sup>13</sup>C NMR (75 MHz, CDCl<sub>3</sub>)  $\delta$  166.6 (C), 165.1 (C), 135.8 (CH), 125.6 (CH), 110.7 (CH), 82.4 (CH), 82.2 (CH), 51.3 (CH<sub>3</sub>), 29.7 (CH<sub>2</sub>), 22.7 (CH<sub>2</sub>), 21.3 (CH<sub>3</sub>), 13.8 (CH<sub>3</sub>); HRMS-EI calcd for C<sub>12</sub>H<sub>18</sub>O<sub>3</sub>, 210.1256 found 210.1253; **E-13i**:  $R_f = 0.40$  (SiO<sub>2</sub>, 4:1 v/v, *n*-hexane/EtOAc); FT-IR (neat)  $\nu$  2960, 2935, 2874, 1724, 1692, 1659, 1216, 1162, 1093, 1025 cm<sup>-1</sup>; <sup>1</sup>H NMR (300 MHz, CDCl<sub>3</sub>)  $\delta$  6.04 (ddd,  $J = 7.3, 4.3, 2.2$  Hz, 1H, H<sup>4</sup>), 5.73–5.63 (m, 2H, H<sup>5</sup> and H<sup>1</sup>), 5.56 (ddq,  $J = 6.5, 4.3,$

2.0 Hz, 1H, H<sup>3</sup>), 5.52 (dd,  $J = 2.4, 2.0$  Hz, 1H, H<sup>2</sup>), 3.71 (s, 3H, OMe), 2.23–2.02 (m, 2H, H<sup>6</sup> and H<sup>7</sup>), 1.63 (d,  $J = 6.5$  Hz, 3H, Me<sup>2</sup>), 1.44–1.34 (m, 2H, H<sup>8</sup> and H<sup>9</sup>), 0.91 (t,  $J = 7.3$  Hz, 3H, Me<sup>1</sup>); <sup>13</sup>C NMR (75 MHz, CDCl<sub>3</sub>) δ 167.2 (C), 165.3 (C), 135.8 (CH), 127.3 (CH), 110.7 (CH), 84.5 (CH), 80.7 (CH), 51.3 (CH<sub>3</sub>), 29.8 (CH<sub>2</sub>), 22.7 (CH<sub>2</sub>), 19.9 (CH<sub>3</sub>), 13.6 (CH<sub>3</sub>); HRMS-EI calcd for C<sub>12</sub>H<sub>18</sub>O<sub>3</sub>, 210.1256 found 210.1261.

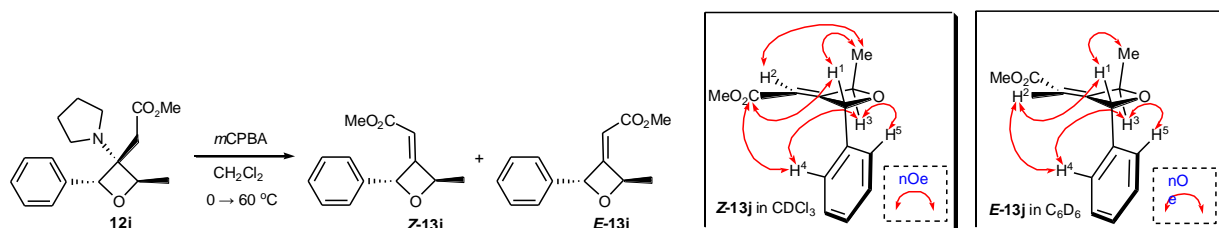

**(Z)- and (E)-[(2R,4R)-2-methyl-4-phenyl-oxetan-3-ylidene]-acetic acid methyl esters (Z-13j) and (E-13j).** According to the general procedure, oxetane **12j** (100 mg, 3.45 mmol) was reacted to give a 91:9 mixture of diastereomers **Z-13j** and **E-13j** (*d.r.* was determined from the crude <sup>1</sup>H NMR spectrum of the reaction) as a pale-yellow oil in 91% yield (69 mg, 3.15 mmol). **Z-13j**: *R<sub>f</sub>* = 0.40 (SiO<sub>2</sub>, 4:1 *v/v*, *n*-hexane/EtOAc); FT-IR (neat)  $\nu$  3036, 2981, 2951, 1722, 1665, 1642, 1449, 1438, 1327, 1259, 1201, 1174, 1032, 700 cm<sup>-1</sup>; <sup>1</sup>H NMR (300 MHz, CDCl<sub>3</sub>) δ 7.52 (dd,  $J = 8.2, 1.5$  Hz, 2H, H<sup>4</sup> and H<sup>5</sup>), 7.41–7.29 (m, 3H, H<sup>6</sup>, H<sup>7</sup> and H<sup>8</sup>), 6.36 (dd,  $J = 4.1, 2.5$  Hz, 1H, H<sup>1</sup>), 5.68 (dd,  $J = 2.5, 2.1$  Hz, 1H, H<sup>2</sup>), 5.64 (qdd,  $J = 6.4, 4.1, 2.1$  Hz, 1H, H<sup>3</sup>), 3.56 (s, 3H, OMe), 1.59 (d,  $J = 6.5$  Hz, 3H, Me); <sup>13</sup>C NMR (75 MHz, CDCl<sub>3</sub>) δ 165.6 (C), 164.8 (C), 138.8 (C), 128.4 (CH), 128.3 (CH × 2), 127.2 (CH × 2), 111.0 (CH), 88.5 (CH), 83.5 (CH), 51.2 (CH<sub>3</sub>), 21.3 (CH<sub>3</sub>); HRMS-EI calcd for C<sub>13</sub>H<sub>14</sub>O<sub>3</sub>, 218.0943 found 218.0935; **E-13j**: *R<sub>f</sub>* = 0.44 (SiO<sub>2</sub>, 4:1 *v/v*, *n*-hexane/EtOAc); FT-IR (neat)  $\nu$  3032, 2950, 1724, 1669, 1646, 1447, 1438, 1325, 1260, 1201, 1176, 1032, 1023, 698 cm<sup>-1</sup>; <sup>1</sup>H NMR (300 MHz, CDCl<sub>3</sub>) δ 7.40 (dd,  $J = 8.2, 1.5$  Hz, 2H, H<sup>4</sup> and H<sup>5</sup>), 7.39–7.33 (m, 3H, H<sup>6</sup>, H<sup>7</sup> and H<sup>8</sup>), 6.20 (dd,  $J = 4.5, 2.0$  Hz, 1H, H<sup>1</sup>), 5.74 (qdd,  $J = 6.4, 4.5, 2.5$  Hz, 1H, H<sup>3</sup>), 5.52 (dd,  $J = 2.5, 2.0$  Hz, 1H, H<sup>2</sup>), 3.69 (s, 3H, OMe), 1.74 (d,  $J = 6.8$  Hz, 3H, Me); <sup>13</sup>C NMR (75 MHz, CDCl<sub>3</sub>) δ 166.5 (C), 165.3 (C), 139.2 (C), 128.7 (CH × 2), 128.6 (CH), 126.0 (CH × 2), 111.3 (CH), 86.3 (CH), 85.2 (CH), 51.4 (CH<sub>3</sub>), 19.9 (CH<sub>3</sub>); <sup>1</sup>H NMR (600 MHz, C<sub>6</sub>D<sub>6</sub>) δ 7.25 (dd,  $J = 7.7, 1.5$  Hz, 2H, H<sup>4</sup> and H<sup>5</sup>), 7.13 (dd,  $J = 7.7, 7.3$  Hz, 2H, H<sup>6</sup> and H<sup>8</sup>), 7.06 (dd,  $J = 7.3, 1.5$  Hz, 2H, H<sup>7</sup>), 5.87 (dd,  $J = 4.4, 2.1$  Hz, 1H, H<sup>1</sup>), 5.74 (qdd,  $J = 6.5, 4.4, 2.4$  Hz, 1H, H<sup>3</sup>), 5.39 (dd,  $J = 2.4, 2.1$  Hz, 1H, H<sup>2</sup>), 3.24 (s, 3H, OMe), 1.74 (d,  $J =$

6.5 Hz, 3H, Me);  $^{13}\text{C}$  NMR (151 MHz,  $\text{C}_6\text{D}_6$ )  $\delta$  167.3 (C), 164.9 (C), 140.3 (C), 128.8 (CH  $\times$  2), 128.4 (CH), 126.2 (CH  $\times$  2), 111.2 (CH), 86.0 (CH), 85.1 (CH), 50.8 (CH<sub>3</sub>), 20.1 (CH<sub>3</sub>); HRMS-EI calcd for  $\text{C}_{13}\text{H}_{14}\text{O}_3$ , 218.0943 found 218.0936.

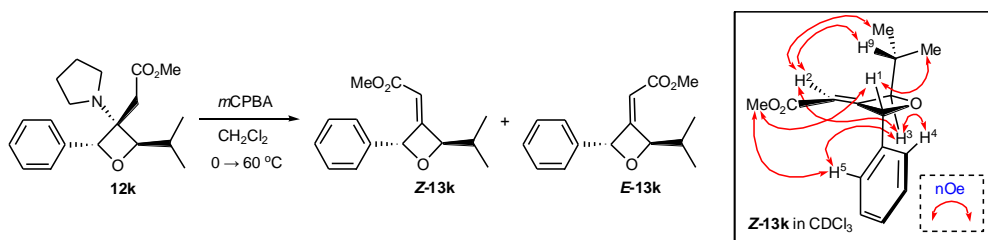

**(Z)- and (E)-[(2R,4R)-2-isopropyl-4-phenyl-oxetan-3-ylidene]-acetic acid methyl esters (Z-13k) and (E-13k).** According to the general procedure, oxetane **12k** (110 mg, 3.47 mmol) was reacted to give a 90:10 mixture of diastereomers **Z-13k** and **E-13k** (*d.r.* was determined from the crude  $^1\text{H}$  NMR spectrum of the reaction) as a colorless oil in 93% yield (80 mg, 3.23 mmol). **Z-13k**:  $R_f$  = 0.49 ( $\text{SiO}_2$ , 4:1 *v/v*, *n*-hexane/EtOAc); FT-IR (neat)  $\nu$  3032, 2962, 2930, 2892, 2873, 1722, 1699, 1653, 1558, 1541, 1521, 1507, 1490, 1456, 1436, 1339, 1270, 1220, 1200, 1101, 1032, 1006, 999, 949, 906, 893, 867, 748, 696, 661  $\text{cm}^{-1}$ ;  $^1\text{H}$  NMR (500 MHz,  $\text{CDCl}_3$ )  $\delta$  7.49 (dd,  $J$  = 8.2, 1.5 Hz, 2H,  $\text{H}^4$  and  $\text{H}^5$ ), 7.38–7.35 (m, 2H,  $\text{H}^6$  and  $\text{H}^8$ ), 7.32–7.29 (m, 1H,  $\text{H}^7$ ), 6.23 (dd,  $J$  = 4.4, 2.7 Hz, 1H,  $\text{H}^1$ ), 5.77 (dd,  $J$  = 2.7, 2.1 Hz, 1H,  $\text{H}^2$ ), 5.26 (ddd,  $J$  = 6.8, 4.4, 2.1 Hz, 1H,  $\text{H}^3$ ), 3.51 (s, 3H, OMe), 2.15–2.08 (m, 1H,  $\text{H}^9$ ), 1.09 (d,  $J$  = 6.7 Hz, 3H, Me), 1.06 (d,  $J$  = 6.7 Hz, 3H, Me);  $^{13}\text{C}$  NMR (126 MHz,  $\text{CDCl}_3$ )  $\delta$  164.6 (C), 163.8 (C), 139.0 (C), 128.3 (CH), 128.2 (CH  $\times$  2), 127.5 (CH  $\times$  2), 111.6 (CH), 91.4 (CH), 88.6 (CH), 51.0 (CH<sub>3</sub>), 33.1 (CH), 17.0 (CH<sub>3</sub>), 16.9 (CH<sub>3</sub>); HRMS-EI calcd for  $\text{C}_{15}\text{H}_{18}\text{O}_3$ , 246.1256 found 246.1254; **E-13k**:  $R_f$  = 0.45 ( $\text{SiO}_2$ , 4:1 *v/v*, *n*-hexane/EtOAc); FT-IR (neat)  $\nu$  3029, 2962, 2932, 2873, 1722, 1699, 1653, 1521, 1507, 1490, 1456, 1438, 1338, 1271, 1222, 1200, 1100, 1031, 1005, 999, 949, 907, 893, 867, 698  $\text{cm}^{-1}$ ;  $^1\text{H}$  NMR (300 MHz,  $\text{CDCl}_3$ )  $\delta$  7.43–7.31 (m, 5H,  $\text{H}^4$ – $\text{H}^8$ ), 6.02 (dd,  $J$  = 4.5, 2.0 Hz, 1H,  $\text{H}^1$ ), 5.59 (ddd,  $J$  = 4.5, 2.6, 2.4 Hz, 1H,  $\text{H}^3$ ), 5.55 (dd,  $J$  = 2.4, 2.0 Hz, 1H,  $\text{H}^2$ ), 3.68 (s, 3H, OMe), 2.54–2.49 (m, 1H,  $\text{H}^9$ ), 1.16 (d,  $J$  = 6.8 Hz, 3H, Me), 1.08 (d,  $J$  = 6.8 Hz, 3H, Me);  $^{13}\text{C}$  NMR (75 MHz,  $\text{CDCl}_3$ )  $\delta$  165.4 (C), 164.9 (C), 139.3 (C), 128.7 (CH  $\times$  2), 128.6 (CH), 126.2 (CH  $\times$  2), 112.1 (CH), 93.3 (CH), 87.3 (CH), 51.3 (CH<sub>3</sub>), 30.6 (CH), 18.3 (CH<sub>3</sub>), 15.7 (CH<sub>3</sub>); HRMS-EI calcd for  $\text{C}_{15}\text{H}_{18}\text{O}_3$ , 246.1256 found 246.1251.

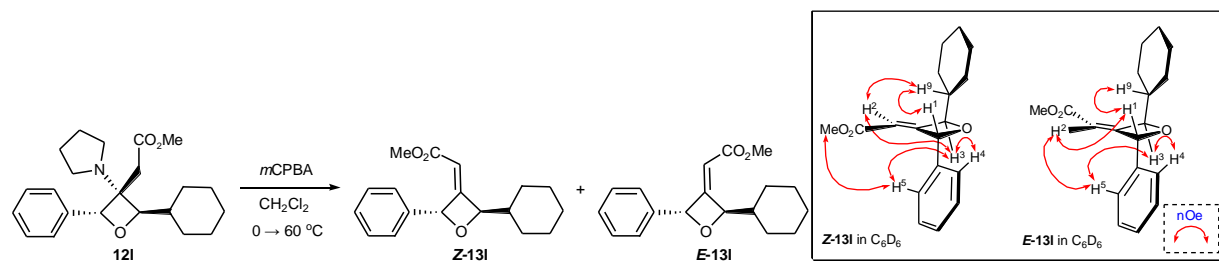

**(Z)- and (E)-[(2R,4R)-2-cyclohexyl-4-phenyl-oxetan-3-ylidene]-acetic acid methyl esters (**Z-13I**) and (**E-13I**).** According to the general procedure, oxetane **12I** (120 mg, 3.36 mmol) was reacted to give a 92:8 mixture of diastereomers **Z-13I** and **E-13I** (*d.r.* was determined from the crude  $^1\text{H}$  NMR spectrum of the reaction) as a colorless oil in 91% yield (88 mg, 3.06 mmol). **Z-13I**:  $R_f = 0.53$  (SiO<sub>2</sub>, 4:1 *v/v*, *n*-hexane/EtOAc); **FT-IR** (neat)  $\nu$  3032, 2927, 2853, 1723, 1699, 1451, 1435, 1339, 1270, 1219, 1199, 1114, 1031, 953, 886, 864, 748, 696  $\text{cm}^{-1}$ ;  **$^1\text{H}$  NMR (300 MHz, CDCl<sub>3</sub>)**  $\delta$  7.47 (dd,  $J = 8.2, 1.5$  Hz, 2H, H<sup>4</sup> and H<sup>5</sup>), 7.39–7.27 (m, 3H, H<sup>6</sup>, H<sup>7</sup> and H<sup>8</sup>), 6.22 (dd,  $J = 4.4, 2.6$  Hz, 1H, H<sup>1</sup>), 5.76 (dd,  $J = 2.6, 2.0$  Hz, 1H, H<sup>2</sup>), 5.28 (ddd,  $J = 6.4, 4.4, 2.0$  Hz, 1H, H<sup>3</sup>), 3.50 (s, 3H, OMe), 1.95–1.64 (m, 6H, H<sup>18</sup>, H<sup>10</sup>, H<sup>13</sup>, H<sup>17</sup>, H<sup>9</sup> and H<sup>15</sup>), 1.32–1.15 (m, 5H, H<sup>11</sup>, H<sup>19</sup>, H<sup>12</sup>, H<sup>14</sup> and H<sup>16</sup>);  **$^{13}\text{C}$  NMR (75 MHz, CDCl<sub>3</sub>)**  $\delta$  164.7 (C), 163.9 (C), 139.1 (C), 128.4 (CH), 128.3 (CH  $\times$  2), 127.5 (CH  $\times$  2), 111.6 (CH), 90.7 (CH), 88.7 (CH), 51.1 (CH<sub>3</sub>), 42.9 (CH), 27.5 (CH<sub>2</sub>), 27.3 (CH<sub>2</sub>), 26.2 (CH<sub>2</sub>), 25.7 (CH<sub>2</sub>), 25.6 (CH<sub>2</sub>);  **$^1\text{H}$  NMR (600 MHz, C<sub>6</sub>D<sub>6</sub>)**  $\delta$  7.59 (dd,  $J = 7.4, 1.3$  Hz, 2H, H<sup>4</sup> and H<sup>5</sup>), 7.29 (dd,  $J = 7.7, 7.4$  Hz, 2H, H<sup>6</sup> and H<sup>8</sup>), 7.11–7.09 (dd,  $J = 7.7, 1.3$  Hz, 1H, H<sup>7</sup>), 6.33 (dd,  $J = 4.4, 2.5$  Hz, 1H, H<sup>1</sup>), 5.62 (dd,  $J = 2.5, 2.1$  Hz, 1H, H<sup>2</sup>), 4.97 (ddd,  $J = 6.4, 4.4, 2.1$  Hz, 1H, H<sup>3</sup>), 3.13 (s, 3H, OMe), 1.89 (m, 1H, H<sup>18</sup>), 1.66–1.62 (m, 3H, H<sup>10</sup>, H<sup>13</sup> and H<sup>17</sup>), 1.58–1.53 (m, 2H, H<sup>9</sup> and H<sup>15</sup>), 1.15–1.08 (m, 5H, H<sup>11</sup>, H<sup>19</sup>, H<sup>12</sup>, H<sup>14</sup> and H<sup>16</sup>);  **$^{13}\text{C}$  NMR (151 MHz, C<sub>6</sub>D<sub>6</sub>)**  $\delta$  164.8 (C), 164.4 (C), 140.2 (C), 128.3 (CH  $\times$  2), 128.3 (CH), 128.2 (CH  $\times$  2), 111.6 (CH), 90.5 (CH), 88.7 (CH), 50.6 (CH<sub>3</sub>), 43.1 (CH), 27.8 (CH<sub>2</sub>), 27.4 (CH<sub>2</sub>), 26.6 (CH<sub>2</sub>), 26.1 (CH<sub>2</sub>), 26.0 (CH<sub>2</sub>); **HRMS-EI** calcd for C<sub>18</sub>H<sub>22</sub>O<sub>3</sub>, 286.1569 found 286.1567; **E-13I**:  $R_f = 0.59$  (SiO<sub>2</sub>, 4/1, *n*-hexane/EtOAc); **FT-IR** (neat)  $\nu$  3030, 2928, 2854, 1722, 1699, 1451, 1436, 1338, 1272, 1219, 1199, 1115, 1032, 953, 887, 864, 748, 698  $\text{cm}^{-1}$ ;  **$^1\text{H}$  NMR (300 MHz, CDCl<sub>3</sub>)**  $\delta$  7.42–7.31 (m, 5H, H<sup>4</sup>–H<sup>8</sup>), 6.01 (dd,  $J = 4.1, 2.0$  Hz, 1H, H<sup>1</sup>), 5.56 (ddd,  $J = 4.1, 2.4, 2.5$  Hz, 1H, H<sup>3</sup>), 5.54 (dd,  $J = 2.5, 2.0$  Hz, 1H, H<sup>2</sup>), 3.68 (s, 3H, OMe), 2.18–2.17 (m, 1H, H<sup>9</sup>), 1.90–1.55 (m, 4H, H<sup>11</sup>, H<sup>10</sup>, H<sup>18</sup> and H<sup>19</sup>), 1.43–1.22 (m, 6H, H<sup>12</sup>–H<sup>17</sup>);  **$^{13}\text{C}$  NMR (75 MHz, CDCl<sub>3</sub>)**  $\delta$  165.4 (C), 164.9 (C), 139.3 (C), 128.7 (CH  $\times$  2), 128.6 (CH), 126.3 (CH  $\times$  2),

112.0 (CH), 93.0 (CH), 87.4 (CH), 51.3 (CH<sub>3</sub>), 40.3 (CH), 28.5 (CH<sub>2</sub>), 26.3 (CH<sub>2</sub>), 26.2 (CH<sub>2</sub>), 26.1 (CH<sub>2</sub>), 26.0 (CH<sub>2</sub>); <sup>1</sup>H NMR (600 MHz, C<sub>6</sub>D<sub>6</sub>) δ 7.28 (dd, *J* = 7.3, 1.3 Hz, 2H, H<sup>4</sup> and H<sup>5</sup>), 7.13 (dd, *J* = 7.8, 7.3 Hz, 2H, H<sup>6</sup> and H<sup>8</sup>), 7.11–7.09 (dd, *J* = 7.8, 1.3 Hz, 1H, H<sup>7</sup>), 5.82 (dd, *J* = 4.5, 2.1 Hz, 1H, H<sup>1</sup>), 5.69 (ddd, *J* = 4.5, 3.4, 2.5 Hz, 1H, H<sup>3</sup>), 5.50 (dd, *J* = 2.5, 2.1 Hz, 1H, H<sup>2</sup>), 3.25 (s, 3H, OMe), 2.45–2.39 (m, 1H, H<sup>9</sup>), 1.96–1.93 (m, 1H, H<sup>19</sup>), 1.79–1.73 (m, 2H, H<sup>10</sup> and H<sup>13</sup>), 1.68–1.60 (m, 4H, H<sup>11</sup>, H<sup>15</sup>, H<sup>17</sup> and H<sup>18</sup>), 1.31–1.14 (m, 3H, H<sup>12</sup>, H<sup>14</sup> and H<sup>16</sup>); <sup>13</sup>C NMR (151 MHz, C<sub>6</sub>D<sub>6</sub>) δ 165.6 (C), 165.1 (C), 140.5 (C), 128.9 (CH × 2), 128.5 (CH), 126.3 (CH × 2), 112.1 (CH), 92.8 (CH), 87.2 (CH), 50.8 (CH<sub>3</sub>), 40.8 (CH), 28.9 (CH<sub>2</sub>), 26.8 (CH<sub>2</sub>), 26.6 (CH<sub>2</sub>), 26.5 (CH<sub>2</sub>), 26.4 (CH<sub>2</sub>); HRMS-EI calcd for C<sub>18</sub>H<sub>22</sub>O<sub>3</sub>, 286.1569 found 286.1562.

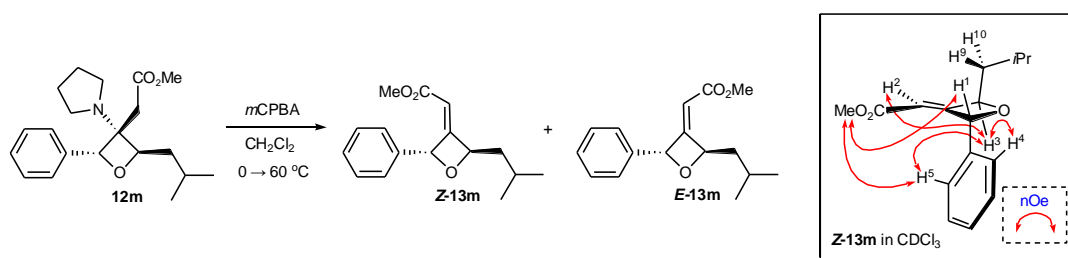

**(Z)- and (E)-[(2*R*,4*R*)-2-isobutyl-4-phenyl-oxetan-3-ylidene]-acetic acid methyl esters (**Z-13m**) and (**E-13m**).** According to the general procedure, oxetane **12m** (110 mg, 3.32 mmol) was reacted to give a 72:28 mixture of diastereomers **Z-13m** and **E-13m** (*d.r.* was determined from the crude <sup>1</sup>H NMR spectrum of the reaction) as a colorless oil in 89% yield (77 mg, 2.95 mmol). **Z-13m**: *R<sub>f</sub>* = 0.51 (SiO<sub>2</sub>, 4:1 *v/v*, *n*-hexane/EtOAc); FT-IR (neat)  $\nu$  3032, 2955, 2927, 2871, 1723, 1699, 1685, 1653, 1617, 1558, 1541, 1521, 1507, 1489, 1456, 1436, 1333, 1218, 1200, 1137, 1107, 1020, 952, 935, 896, 865, 831, 767, 744, 697, 662 cm<sup>-1</sup>; <sup>1</sup>H NMR (500 MHz, CDCl<sub>3</sub>) δ 7.50 (dd, *J* = 8.2, 1.5 Hz, 2H, H<sup>4</sup> and H<sup>5</sup>), 7.39–7.36 (m, 2H, H<sup>6</sup> and H<sup>8</sup>), 7.33–7.30 (m, 1H, H<sup>7</sup>), 6.32 (dd, *J* = 4.3, 2.7 Hz, 1H, H<sup>1</sup>), 5.71 (dd, *J* = 2.7, 2.1 Hz, 1H, H<sup>2</sup>), 5.62–5.58 (m, 1H, H<sup>3</sup>), 3.54 (s, 3H, OMe), 1.98–1.90 (m, 1H, H<sup>10</sup>), 1.88–1.84 (m, 1H, H<sup>11</sup>), 1.68–1.63 (m, 1H, H<sup>9</sup>), 0.94 (d, *J* = 6.5 Hz, 3H, Me), 0.93 (d, *J* = 6.5 Hz, 3H, Me); <sup>13</sup>C NMR (126 MHz, CDCl<sub>3</sub>) δ 165.4 (C), 164.8 (C), 139.0 (C), 128.4 (CH), 128.3 (CH × 2), 127.4 (CH × 2), 110.9 (CH), 88.6 (CH), 85.8 (CH), 51.1 (CH<sub>3</sub>), 44.8 (CH<sub>2</sub>), 24.6 (CH), 23.0 (CH<sub>3</sub>), 22.3 (CH<sub>3</sub>); HRMS-EI calcd for C<sub>16</sub>H<sub>20</sub>O<sub>3</sub>, 260.1412 found 260.1416; **E-13m**: *R<sub>f</sub>* = 0.57 (SiO<sub>2</sub>, 4:1 *v/v*, *n*-hexane/EtOAc); FT-IR (neat)  $\nu$  3030, 2953, 2928, 2869, 1722, 1699, 1686, 1653, 1617, 1558, 1541, 1522, 1507, 1489, 1457, 1436, 1336, 1218, 1200, 1137, 1106, 1021, 952, 935, 896, 865, 767, 744, 698 cm<sup>-1</sup>; <sup>1</sup>H NMR

(300 MHz, CDCl<sub>3</sub>) δ 7.43–7.33 (m, 5H, H<sup>4</sup>–H<sup>8</sup>), 6.16 (dd, *J* = 4.4, 2.1 Hz, 1H, H<sup>1</sup>), 5.72–5.69 (m, 1H, H<sup>3</sup>), 5.50 (dd, *J* = 2.5, 2.3 Hz, 1H, H<sup>2</sup>), 3.69 (s, 3H, OMe), 2.00–1.93 (m, 3H, H<sup>9</sup>–H<sup>11</sup>), 1.02 (d, *J* = 6.5 Hz, 3H, Me), 0.99 (d, *J* = 6.5 Hz, 3H, Me); <sup>13</sup>C NMR (75 MHz, CDCl<sub>3</sub>) δ 166.4 (C), 165.3 (C), 139.2 (C), 128.8 (CH × 2), 128.7 (CH), 126.3 (CH × 2), 111.2 (CH), 87.5 (CH), 86.5 (CH), 51.4 (CH<sub>3</sub>), 42.3 (CH<sub>2</sub>), 24.5 (CH), 23.6 (CH<sub>3</sub>), 21.6 (CH<sub>3</sub>); HRMS-EI calcd for C<sub>16</sub>H<sub>20</sub>O<sub>3</sub>, 260.1412 found 260.1417.

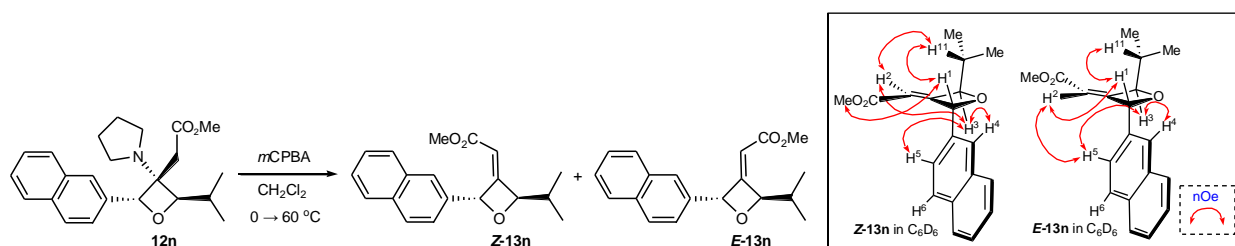

**(Z)- and (E)-[(2*R*,4*R*)-2-isopropyl-4-naphthalen-2-yl-oxetan-3-ylidene]-acetic acid methyl esters (**Z-13n**) and (**E-13n**).** According to the general procedure, oxetane **12n** (120 mg, 3.27 mmol) was reacted to give a 89:11 mixture of diastereomers **Z-13n** and **E-13n** (*d.r.* was determined from the crude <sup>1</sup>H NMR spectrum of the reaction) as a colorless oil in 88% yield (86 mg, 2.86 mmol). **Z-13n**: *R<sub>f</sub>* = 0.49 (SiO<sub>2</sub>, 4:1 *v/v*, *n*-hexane/EtOAc); FT-IR (neat) *v* 2962, 2873, 1722, 1698, 1541, 1507, 1456, 1435, 1339, 1270, 1219, 1199, 1100, 1032, 998, 949, 893, 867, 747, 696 cm<sup>-1</sup>; <sup>1</sup>H NMR (300 MHz, CDCl<sub>3</sub>) δ 7.95 (s, 1H, H<sup>4</sup>), 7.88–7.81 (m, 3H, H<sup>5</sup>, H<sup>6</sup> and H<sup>10</sup>), 7.62 (dd, *J* = 8.6, 1.8 Hz, 1H, H<sup>7</sup>), 7.51–7.45 (m, 2H, H<sup>8</sup> and H<sup>9</sup>), 6.40 (dd, *J* = 4.4, 2.5 Hz, 1H, H<sup>1</sup>), 5.81 (dd, *J* = 2.5, 2.0 Hz, 1H, H<sup>2</sup>), 5.35 (ddd, *J* = 6.8, 4.4, 2.0 Hz, 1H, H<sup>3</sup>), 3.48 (s, 3H, OMe), 2.20–2.13 (m, 1H, H<sup>11</sup>), 1.12 (d, *J* = 6.7 Hz, 3H, Me), 1.10 (d, *J* = 6.7 Hz, 3H, Me); <sup>13</sup>C NMR (75 MHz, CDCl<sub>3</sub>) δ 164.6 (C), 163.8 (C), 136.5 (C), 133.4 (C), 133.1 (C), 128.2 (CH), 128.1 (CH), 127.7 (CH), 126.9 (CH), 126.2 (CH), 126.0 (CH), 125.2 (CH), 111.8 (CH), 91.6 (CH), 88.8 (CH), 51.2 (CH<sub>3</sub>), 33.3 (CH), 17.1 (CH<sub>3</sub>), 17.0 (CH<sub>3</sub>); <sup>1</sup>H NMR (600 MHz, C<sub>6</sub>D<sub>6</sub>) δ 8.02 (d, *J* = 0.6 Hz, 1H, H<sup>4</sup>), 7.76 (dd, *J* = 8.4, 1.6 Hz, 1H, H<sup>5</sup>), 7.69–7.68 (m, 2H, H<sup>6</sup> and H<sup>10</sup>), 7.62–7.60 (m, 1H, H<sup>7</sup>), 7.26–7.23 (m, 2H, H<sup>8</sup> and H<sup>9</sup>), 6.49 (dd, *J* = 4.4, 2.6 Hz, 1H, H<sup>1</sup>), 5.65 (dd, *J* = 2.6, 2.1 Hz, 1H, H<sup>2</sup>), 5.00 (ddd, *J* = 6.4, 4.4, 2.1 Hz, 1H, H<sup>3</sup>), 3.07 (s, 3H, OMe), 1.84 (qqd, *J* = 6.8, 6.8, 6.4 Hz, 1H, H<sup>11</sup>), 0.97 (d, *J* = 6.8 Hz, 3H, Me), 0.88 (d, *J* = 6.8 Hz, 3H, Me); <sup>13</sup>C NMR (151 MHz, C<sub>6</sub>D<sub>6</sub>) δ 164.6 (C), 164.3 (C), 137.5 (C), 133.9 (C), 133.7 (C), 128.5 (CH), 128.3 (CH), 127.9 (CH), 127.6 (CH), 126.3 (CH), 126.2 (CH), 125.8 (CH), 111.8 (CH), 91.3

(CH), 88.8 (CH), 50.6 (CH<sub>3</sub>), 33.5 (CH), 17.2 (CH<sub>3</sub>), 17.0 (CH<sub>3</sub>); **HRMS-EI** calcd for C<sub>19</sub>H<sub>20</sub>O<sub>3</sub>, 296.1412 found 296.1410; **E-13n**: **R<sub>f</sub>** = 0.54 (SiO<sub>2</sub>, 4:1 v/v, *n*-hexane/EtOAc); **FT-IR** (neat)  $\nu$  2963, 2872, 1723, 1697, 1541, 1507, 1456, 1436, 1340, 1269, 1220, 1200, 1100, 1032, 997, 949, 893, 867, 746, 698 cm<sup>-1</sup>; **<sup>1</sup>H NMR (300 MHz, CDCl<sub>3</sub>)**  $\delta$  7.89–7.82 (m, 4H, H<sup>4</sup>–H<sup>6</sup> and H<sup>10</sup>), 7.54–7.47 (m, 3H, H<sup>7</sup>–H<sup>9</sup>), 6.18 (dd, *J* = 4.5, 1.8 Hz, 1H, H<sup>1</sup>), 5.67 (ddd, *J* = 4.5, 2.6, 2.2 Hz, 1H, H<sup>3</sup>), 5.57 (dd, *J* = 2.2, 1.8 Hz, 1H, H<sup>2</sup>), 3.68 (s, 3H, OMe), 2.59–2.53 (m, 1H, H<sup>11</sup>), 1.12 (d, *J* = 6.8 Hz, 3H, Me), 1.08 (d, *J* = 6.8 Hz, 3H, Me); **<sup>13</sup>C NMR (75 MHz, CDCl<sub>3</sub>)**  $\delta$  165.4 (C), 164.9 (C), 136.7 (C), 133.4 (C), 133.1 (C), 128.8 (CH), 128.1 (CH), 127.7 (CH), 126.4 (CH), 126.3 (CH), 125.5 (CH), 123.7 (CH), 112.2 (CH), 93.5 (CH), 87.5 (CH), 51.4 (CH<sub>3</sub>), 30.6 (CH), 18.3 (CH<sub>3</sub>), 15.8 (CH<sub>3</sub>); **<sup>1</sup>H NMR (600 MHz, C<sub>6</sub>D<sub>6</sub>)**  $\delta$  7.69 (s, 1H, H<sup>4</sup>), 7.63–7.59 (m, 3H, H<sup>6</sup>, H<sup>10</sup> and H<sup>7</sup>), 7.40 (dd, *J* = 8.5, 1.6 Hz, 1H, H<sup>5</sup>), 7.27–7.23 (m, 2H, H<sup>8</sup> and H<sup>9</sup>), 5.94 (dd, *J* = 4.4, 1.7 Hz, 1H, H<sup>1</sup>), 5.76 (ddd, *J* = 4.4, 2.8, 2.3 Hz, 1H, H<sup>3</sup>), 5.52 (dd, *J* = 2.3, 1.7 Hz, 1H, H<sup>2</sup>), 3.26 (s, 3H, OMe), 2.76 (qqd, *J* = 7.1, 6.8, 2.8 Hz, 1H, H<sup>11</sup>), 1.25 (d, *J* = 6.8 Hz, 3H, Me), 1.17 (d, *J* = 7.1 Hz, 3H, Me); **<sup>13</sup>C NMR (151 MHz, C<sub>6</sub>D<sub>6</sub>)**  $\delta$  165.5 (C), 165.1 (C), 137.8 (C), 133.9 (C), 133.8 (C), 128.9 (CH), 128.5 (CH), 128.1 (CH), 126.5 (CH), 126.4 (CH), 125.5 (CH), 124.0 (CH), 112.4 (CH), 93.2 (CH), 87.3 (CH), 51.8 (CH<sub>3</sub>), 31.0 (CH), 18.6 (CH<sub>3</sub>), 16.1 (CH<sub>3</sub>); **HRMS-EI** calcd for C<sub>19</sub>H<sub>20</sub>O<sub>3</sub>, 296.1412 found 296.1420.

### General procedure for the conjugate addition of primary amine

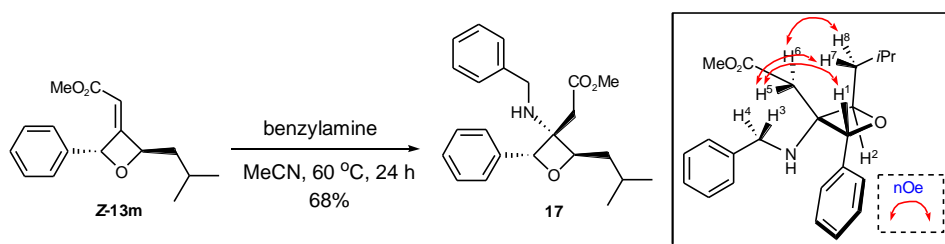

**Synthesis of  $\beta$ -oxetanyl containing amino ester 17.** Benzylamine (0.21 mL, 1.92 mmol, 10.0 equiv) was added to the oxetane **Z-13m** (50 mg, 0.19 mmol, 1.0 equiv) in acetonitrile (1.0 mL). The resulting mixture was stirred at 60 °C for 24 h, and the cooled to ambient temperature. The solvent was removed by rotary evaporation. The crude residue was purified by flash-column chromatography (*n*-hexane/EtOAc, 10:1) to afford oxetane **17** (48 mg, 0.13 mmol) as a pale-yellow oil in 68% yield. **R<sub>f</sub>** = 0.50 (SiO<sub>2</sub>, 4:1 v/v, *n*-hexane/EtOAc); **FT-IR** (neat)  $\nu$  2953, 2928,

1736, 1454, 1436, 1200, 1176, 988, 745, 700  $\text{cm}^{-1}$ ;  $^1\text{H NMR}$  (600 MHz,  $\text{C}_6\text{D}_6$ )  $\delta$  7.75 (d,  $J = 7.6$  Hz, 2H, Ph-H), 7.22 (t,  $J = 7.7$  Hz, 2H, Ph-H), 7.08 (t,  $J = 7.4$  Hz, 2H, Ph-H), 7.03–7.00 (m, 4H, Ph-H), 6.98–6.95 (m, 1H, Ph-H), 5.90 (s, 1H,  $\text{H}^1$ ), 4.74 (dd,  $J = 10.3, 2.7$  Hz, 1H,  $\text{H}^2$ ), 3.47 ( $\text{ABq}$ ,  $J = 12.9$  Hz, 1H,  $\text{H}^3$ ), 3.34 (s, 3H, OMe), 3.33 ( $\text{ABq}$ ,  $J = 12.9$  Hz, 1H,  $\text{H}^4$ ), 2.83 ( $\text{ABq}$ ,  $J = 14.8$  Hz, 1H,  $\text{H}^5$ ), 2.74 ( $\text{ABq}$ ,  $J = 14.8$  Hz, 1H,  $\text{H}^6$ ), 1.82–1.75 (m, 1H,  $\text{H}^9$ ), 1.56 (ddd,  $J = 13.3, 10.3, 5.6$  Hz, 1H,  $\text{H}^7$ ), 1.08 (ddd,  $J = 13.3, 7.6, 2.8$  Hz, 1H,  $\text{H}^8$ ), 0.99 (d,  $J = 6.7$  Hz, 1H,  $\text{CH}_3$ ), 0.88 (d,  $J = 6.6$  Hz, 1H,  $\text{CH}_3$ );  $^{13}\text{C NMR}$  (151 MHz,  $\text{C}_6\text{D}_6$ )  $\delta$  171.5 (C), 140.8 (C), 139.2 (C), 128.5 (CH  $\times$  2), 128.4 (CH  $\times$  2), 128.2 (CH  $\times$  2), 127.8 (CH), 127.1 (CH), 127.0 (CH  $\times$  2), 88.6 (CH), 88.3 (CH), 62.8 (C), 51.0 ( $\text{CH}_3$ ), 46.9 ( $\text{CH}_2$ ), 41.7 ( $\text{CH}_2$ ), 37.3 ( $\text{CH}_2$ ), 25.5 (CH), 23.5 ( $\text{CH}_3$ ), 22.5 ( $\text{CH}_3$ ); HRMS-EI calcd for  $\text{C}_{23}\text{H}_{29}\text{NO}_3$ , 367.2147 found 367.2141.

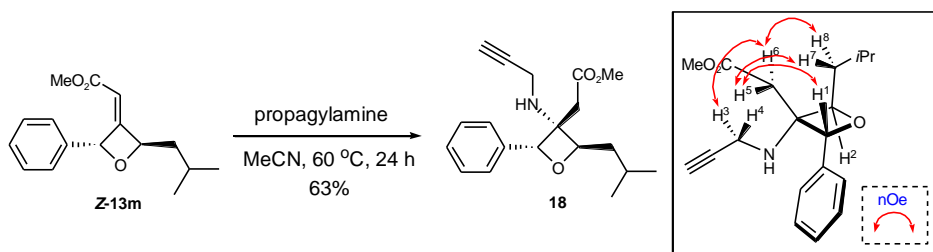

**Synthesis of  $\beta$ -oxetanyl containing amino ester 18.** Prepared according to the above procedure, compound **Z-13m** (50 mg, 0.19 mmol, 1.0 equiv) was reacted with propargylamine (0.12 mL, 1.92 mmol, 10.0 equiv) to give oxetane **18** (38 mg, 0.12 mmol) as a pale-yellow oil in 63% yield.  $R_f = 0.55$  ( $\text{SiO}_2$ , 7:1 v/v, *n*-hexane/EtOAc); **FT-IR** (neat)  $\nu$  3303, 2955, 2926, 2232, 2111, 1735, 1452, 1206, 1173, 986, 742, 702  $\text{cm}^{-1}$ ;  $^1\text{H NMR}$  (600 MHz,  $\text{C}_6\text{D}_6$ )  $\delta$  7.71 (d,  $J = 7.7$  Hz, 2H, Ph-H), 7.24 (t,  $J = 7.7$  Hz, 2H, Ph-H), 7.10 (t,  $J = 7.4$  Hz, 1H, Ph-H), 5.91 (s, 1H,  $\text{H}^1$ ), 4.96 (dd,  $J = 10.5, 2.2$  Hz, 1H,  $\text{H}^2$ ), 3.31 (s, 3H, OMe), 3.06 ( $\text{ABq}$ ,  $J = 17.4$  Hz, 1H,  $\text{H}^3$ ), 2.09 ( $\text{ABq}$ ,  $J = 17.4$  Hz, 1H,  $\text{H}^4$ ), 2.79 ( $\text{ABq}$ ,  $J = 14.7$  Hz, 1H,  $\text{H}^5$ ), 2.68 ( $\text{ABq}$ ,  $J = 14.7$  Hz, 1H,  $\text{H}^6$ ), 1.91–1.85 (m, 1H,  $\text{H}^9$ ), 1.64 (t,  $J = 2.4$  Hz, 1H, acetylene-H), 1.55 (ddd,  $J = 13.6, 10.5, 5.9$  Hz, 1H,  $\text{H}^7$ ), 1.38 (ddd,  $J = 13.6, 7.9, 2.3$  Hz, 1H,  $\text{H}^8$ ), 1.03 (d,  $J = 6.7$  Hz, 1H,  $\text{CH}_3$ ), 0.94 (d,  $J = 6.6$  Hz, 1H,  $\text{CH}_3$ );  $^{13}\text{C NMR}$  (151 MHz,  $\text{C}_6\text{D}_6$ )  $\delta$  171.3 (C), 138.8 (C), 128.5 (CH  $\times$  2), 127.8 (CH), 127.0 (CH  $\times$  2), 89.3 (CH), 88.3 (CH), 83.3 (C), 71.4 (CH), 62.5 (C), 51.0 ( $\text{CH}_3$ ), 41.8 ( $\text{CH}_2$ ), 36.8 ( $\text{CH}_2$ ), 31.9 ( $\text{CH}_2$ ), 25.6 (CH), 23.6 ( $\text{CH}_3$ ), 22.5 ( $\text{CH}_3$ ); HRMS-EI calcd for  $\text{C}_{19}\text{H}_{25}\text{NO}_3\text{Na}$ , 338.1732 found 338.1726.



### III. References

- [1] Y.-J. Li, G.-M. Ho, P.-Z. Chen, *Tetrahedron: Asymmetry* **2009**, *20*, 1854-1863.
- [2] I. D. Jurberg, Y. Odabachian, F. Gagosz, *J. Am. Chem. Soc.* **2010**, *132*, 3543-3552.
- [3] S. Braverman, T. Pechenick-Azizi, H. E. Gottlieb, M. Sprecher, *Synthesis* **2011**, *2011*, 1741-1750.
- [4] J. Barluenga, F. J. Fañanás, R. Sanz, C. Marcos, *Chem. Eur. J.* **2005**, *11*, 5397-5407.
- [5] Y. K. Booth, W. Kitching, J. J. De Voss, *ChemBioChem* **2011**, *12*, 155-172.
- [6] V. K. Aggarwal, C. G. Sheldon, G. J. Macdonald, W. P. Martin, *J. Am. Chem. Soc.* **2002**, *124*, 10300-10301.
- [7] R. P. Hanzlik, A. R. Schaefer, J. B. Moon, C. M. Judson, *J. Am. Chem. Soc.* **1987**, *109*, 4926-4930.

## IV. NMR spectra

### $^1\text{H}$ NMR Spectrum of **K1** in $\text{CDCl}_3$

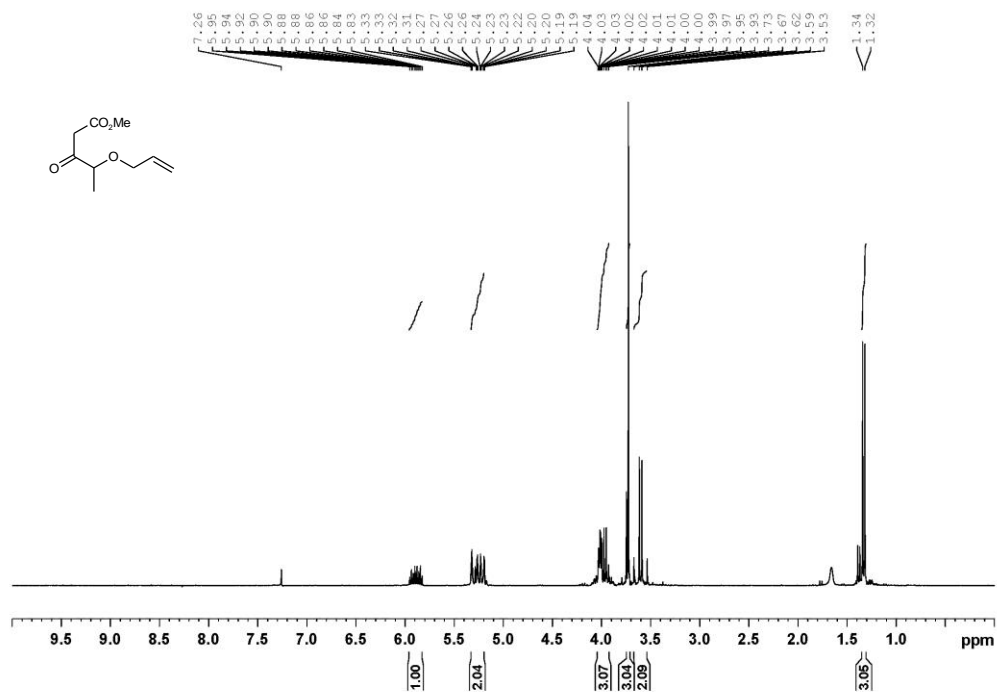

### $^{13}\text{C}$ NMR Spectrum of **K1** in $\text{CDCl}_3$

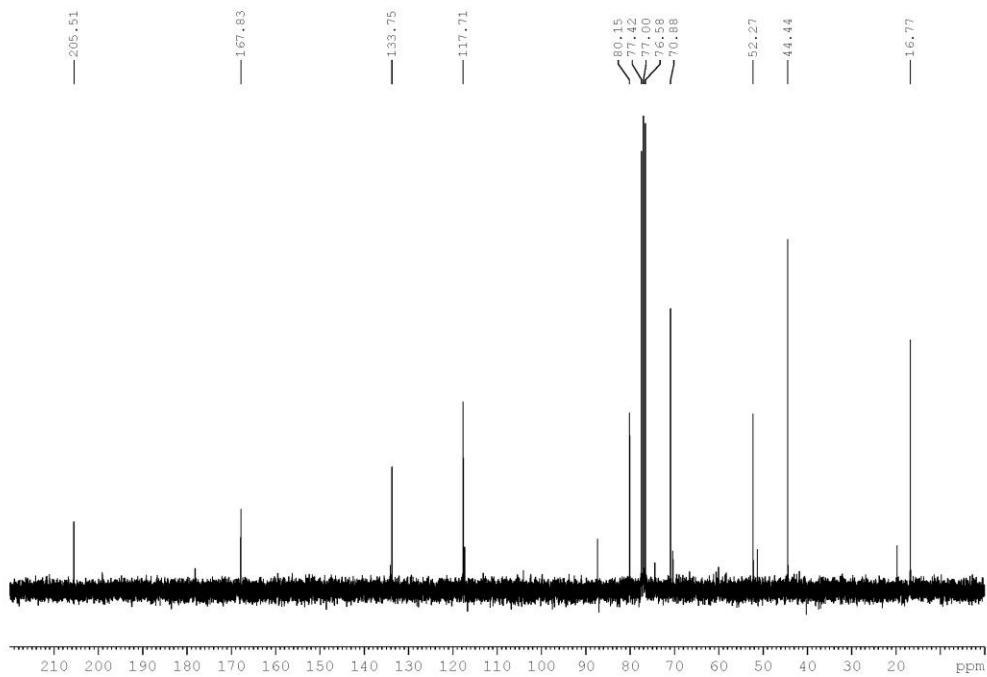

# <sup>1</sup>H NMR Spectrum of **K2** in CDCl<sub>3</sub>

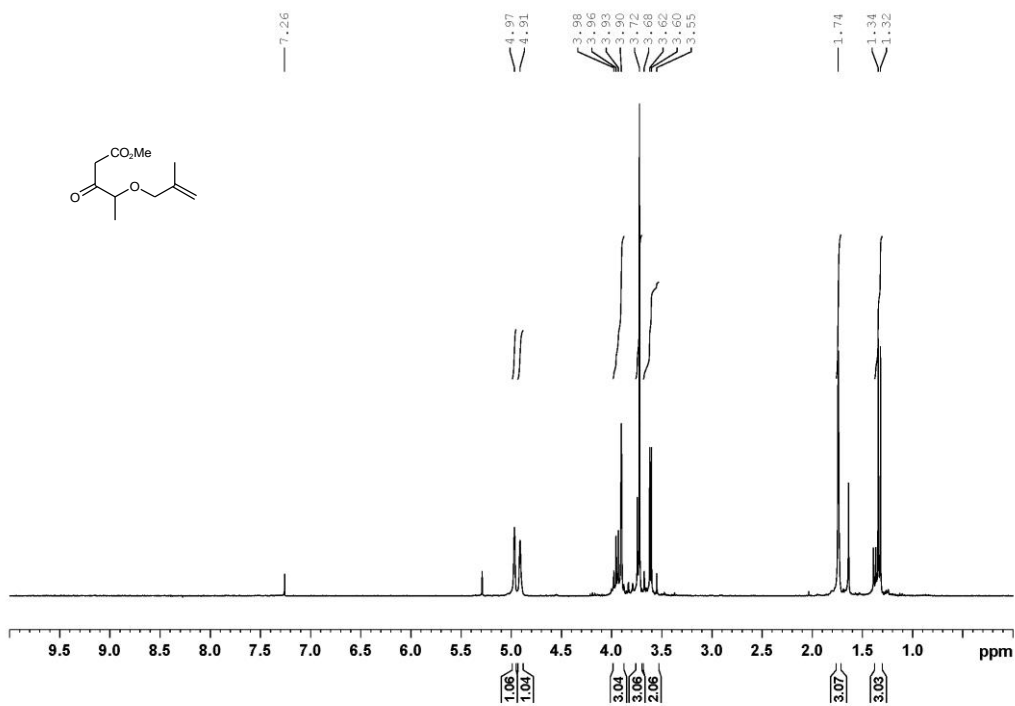

# <sup>13</sup>C NMR Spectrum of **K2** in CDCl<sub>3</sub>

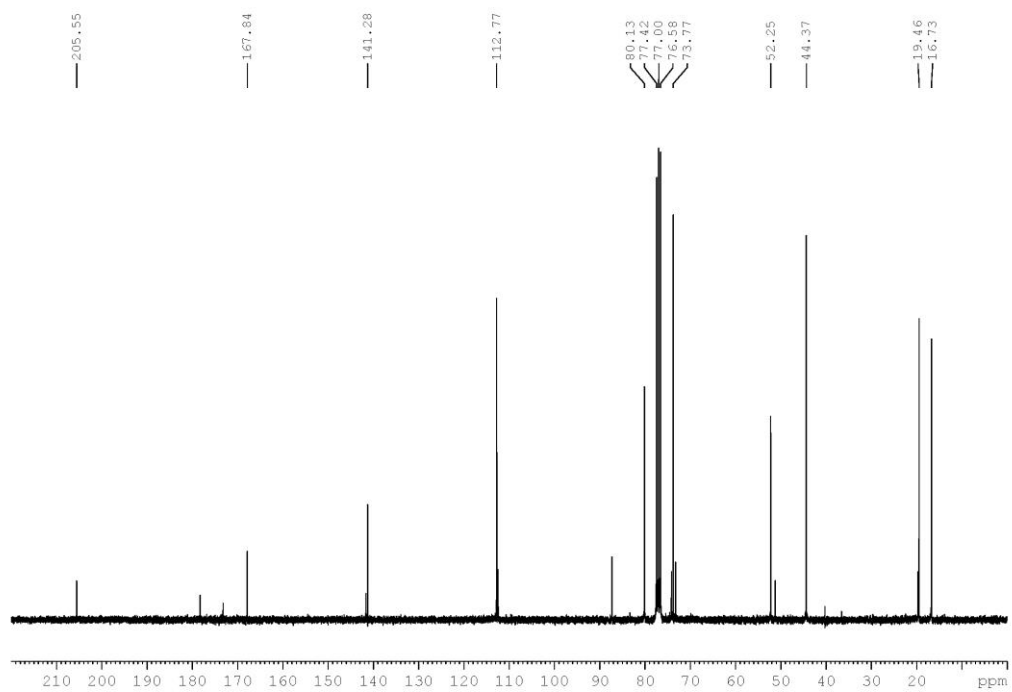

# <sup>1</sup>H NMR Spectrum of **K3** in CDCl<sub>3</sub>

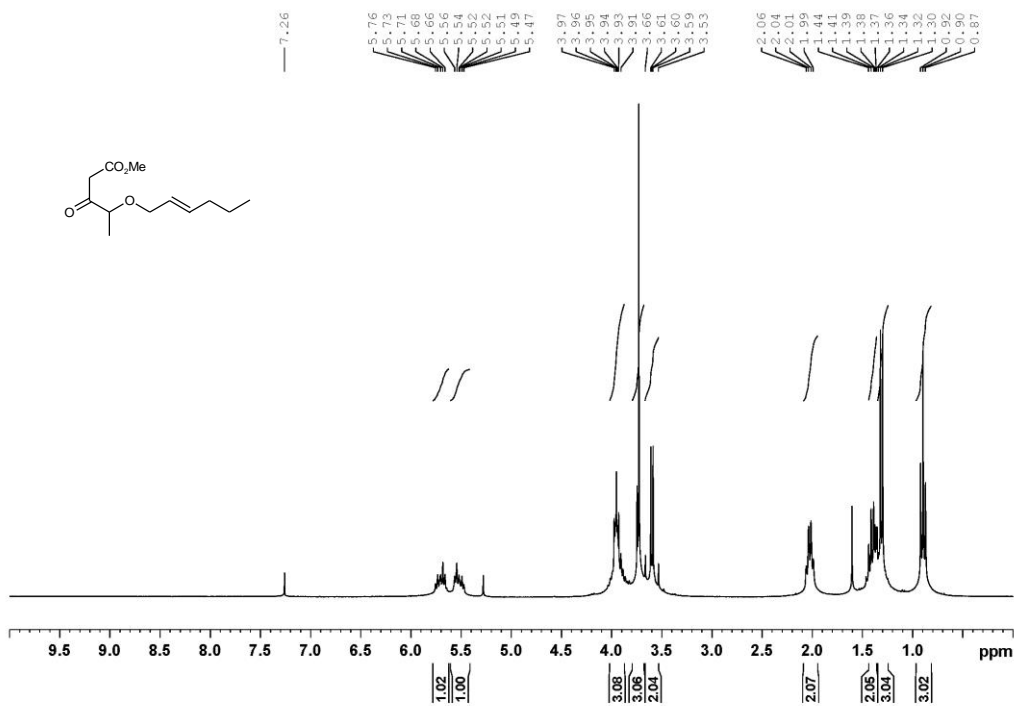

# <sup>13</sup>C NMR Spectrum of **K3** in CDCl<sub>3</sub>

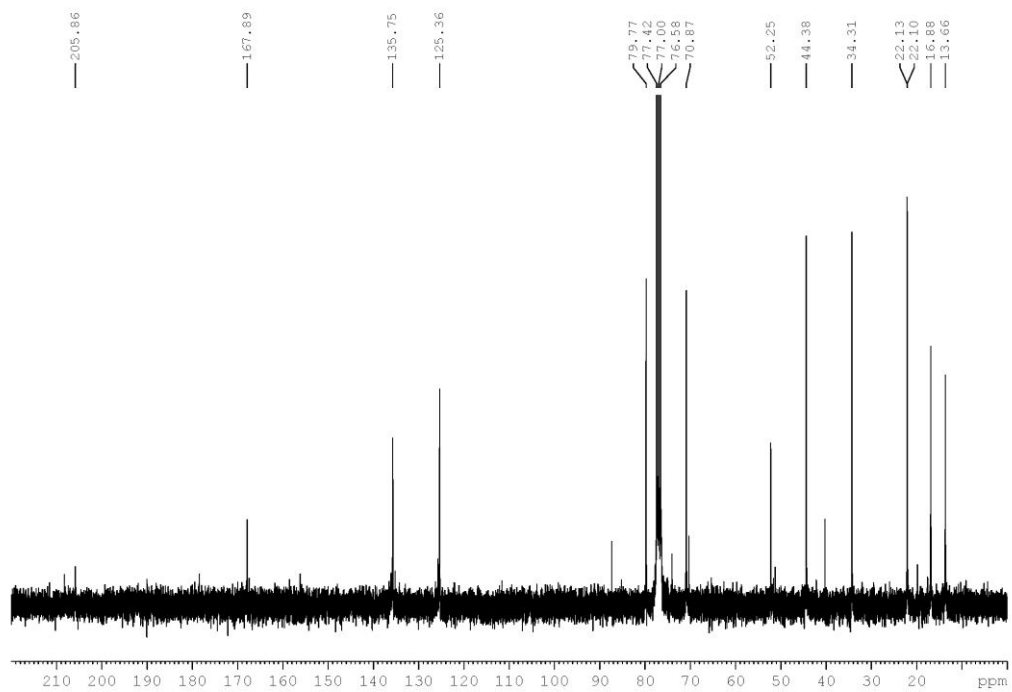

# <sup>1</sup>H NMR Spectrum of **K4** in CDCl<sub>3</sub>

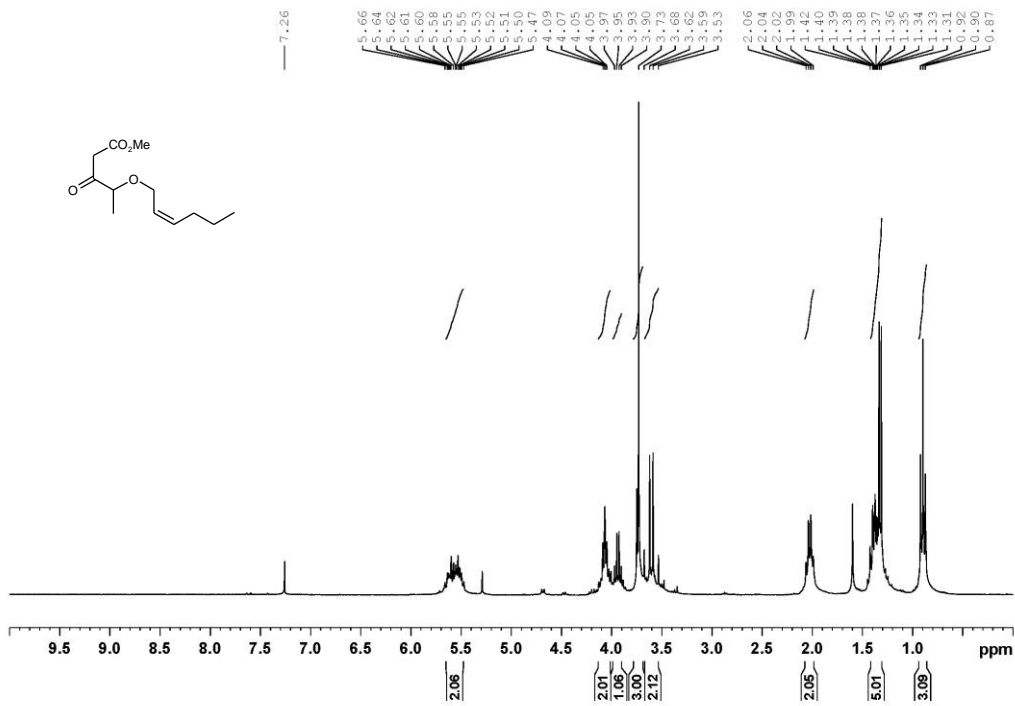

# <sup>13</sup>C NMR Spectrum of **K4** in CDCl<sub>3</sub>

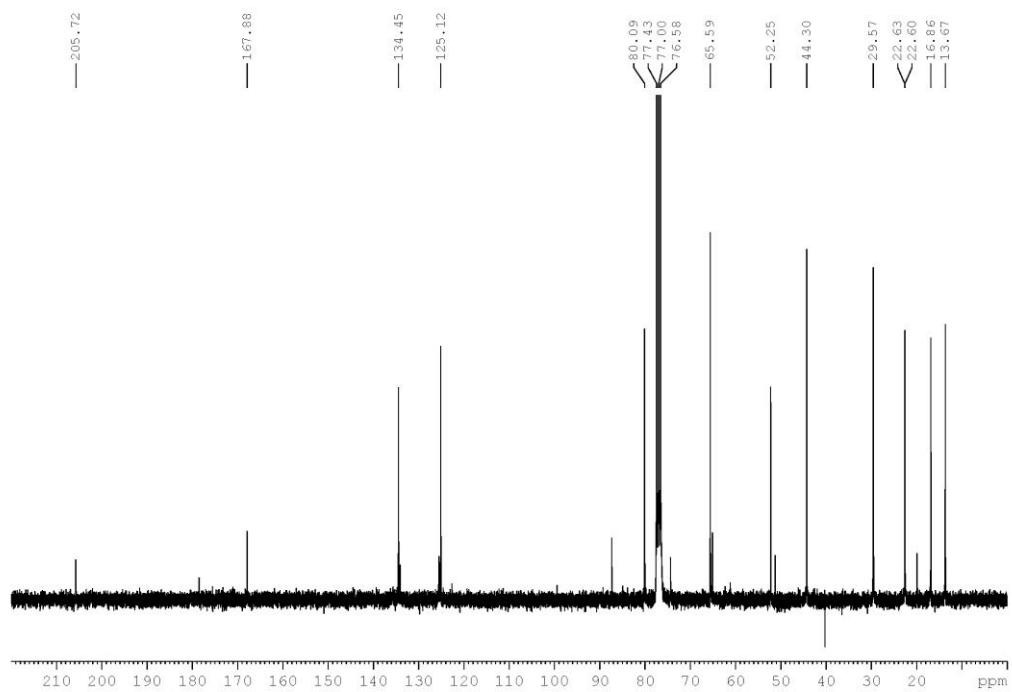

### <sup>1</sup>H NMR Spectrum of **K5** in CDCl<sub>3</sub>

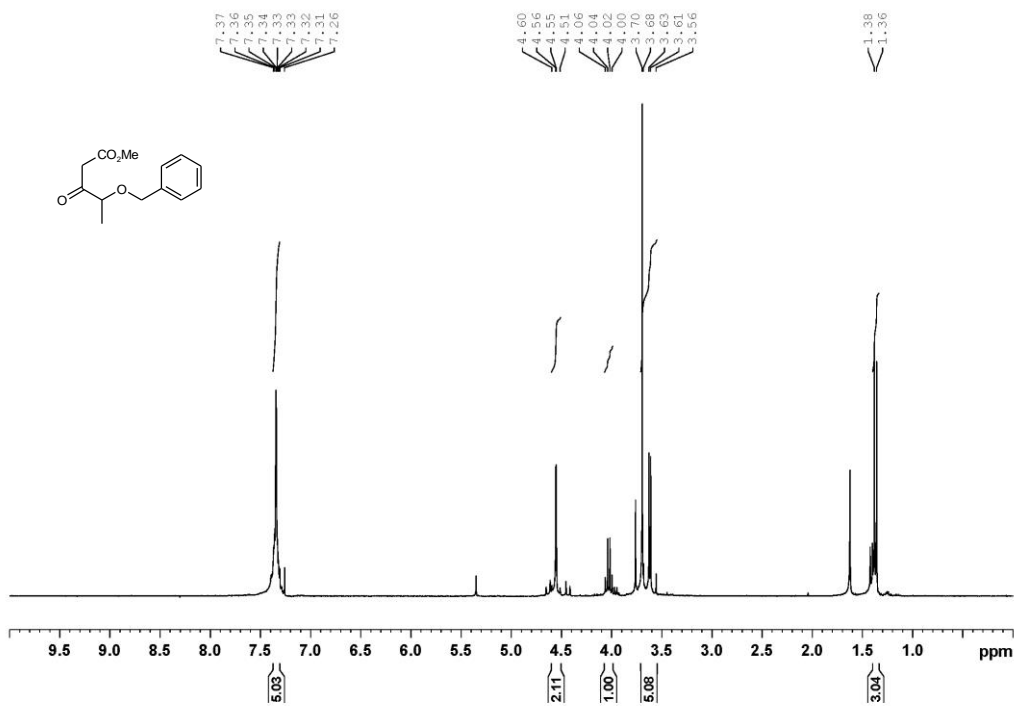

### <sup>13</sup>C NMR Spectrum of **K5** in CDCl<sub>3</sub>

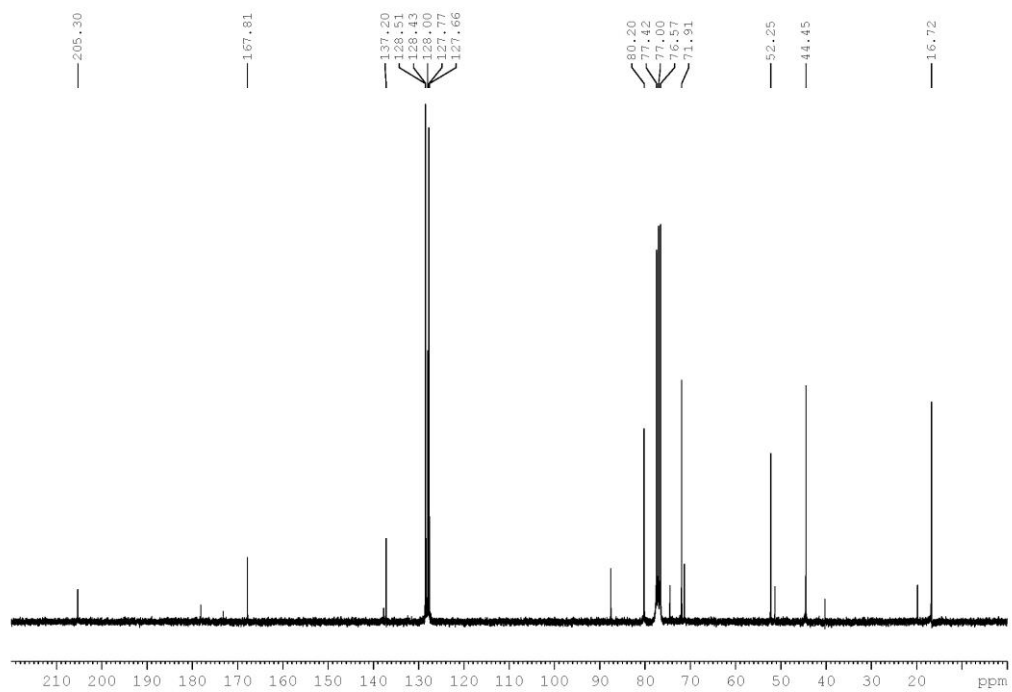

### $^1\text{H}$ NMR Spectrum of **E1** in $\text{CDCl}_3$

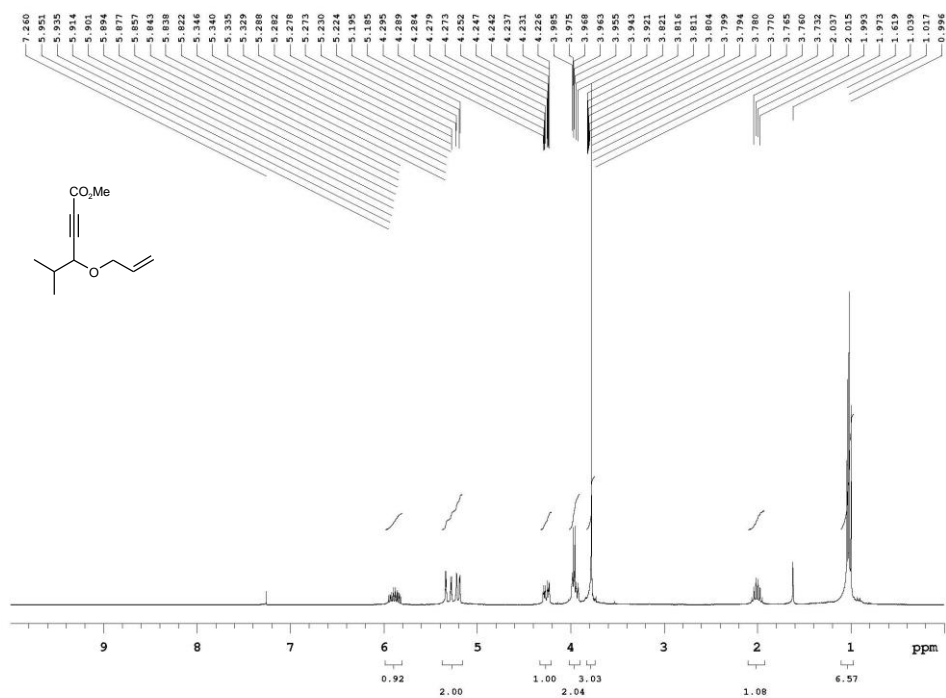

### $^{13}\text{C}$ NMR Spectrum of **E1** in $\text{CDCl}_3$

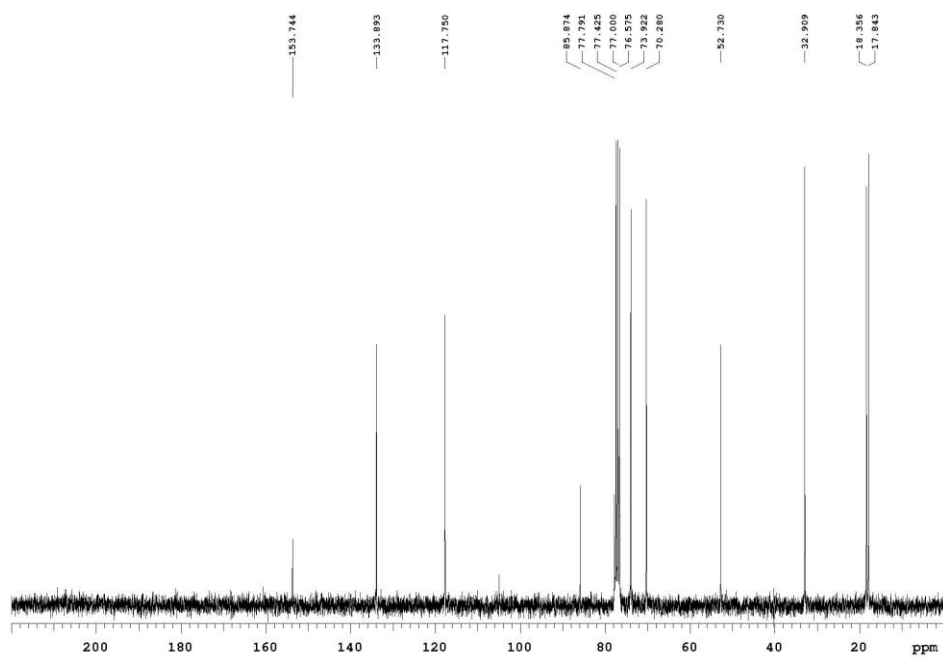

### <sup>1</sup>H NMR Spectrum of **E2** in CDCl<sub>3</sub>

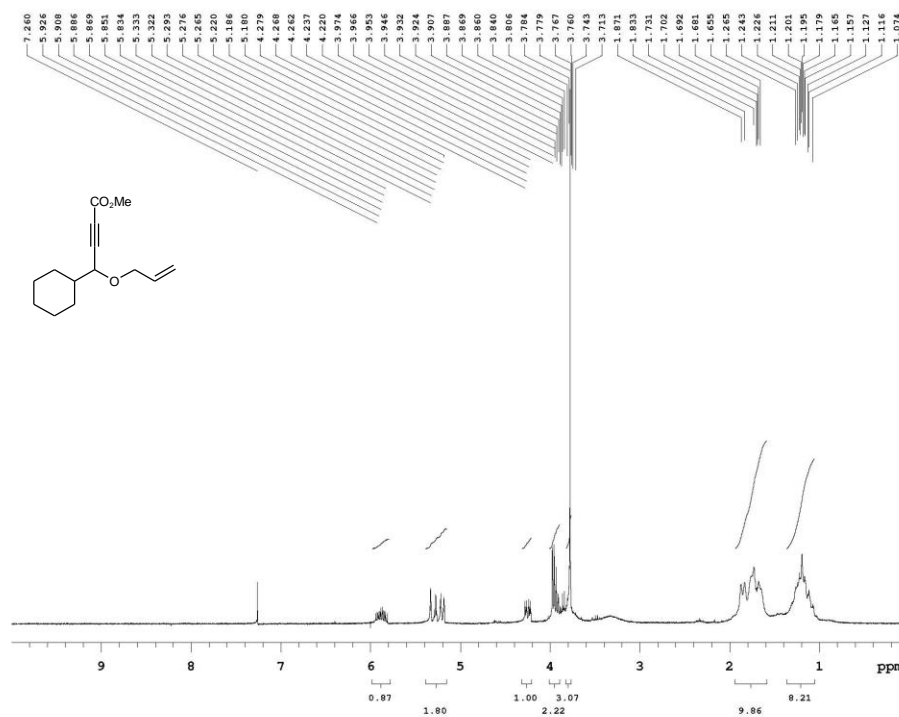

### <sup>13</sup>C NMR Spectrum of **E2** in CDCl<sub>3</sub>

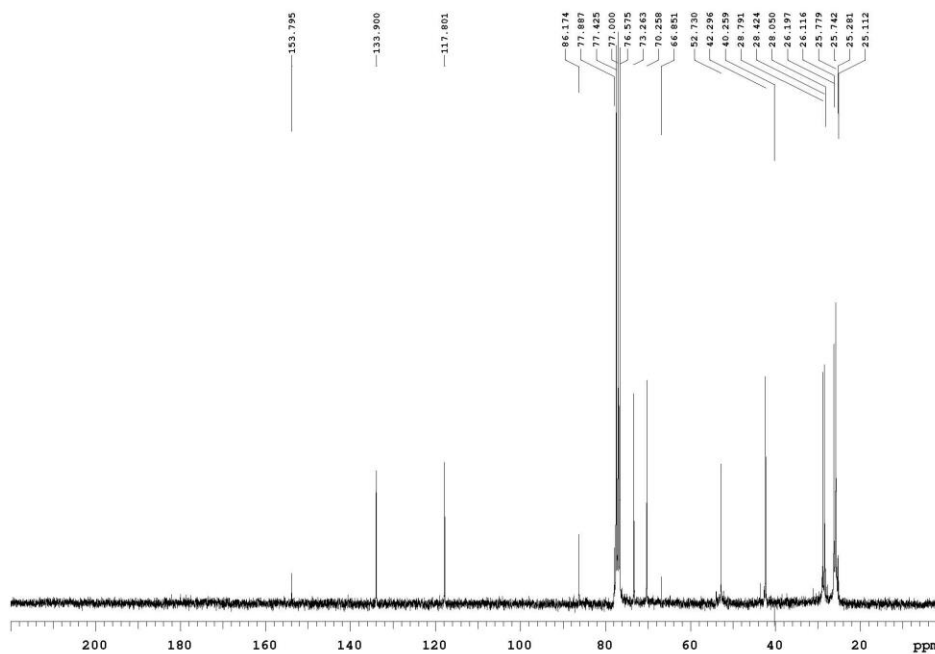



### <sup>1</sup>H NMR Spectrum of **E3** in CDCl<sub>3</sub>

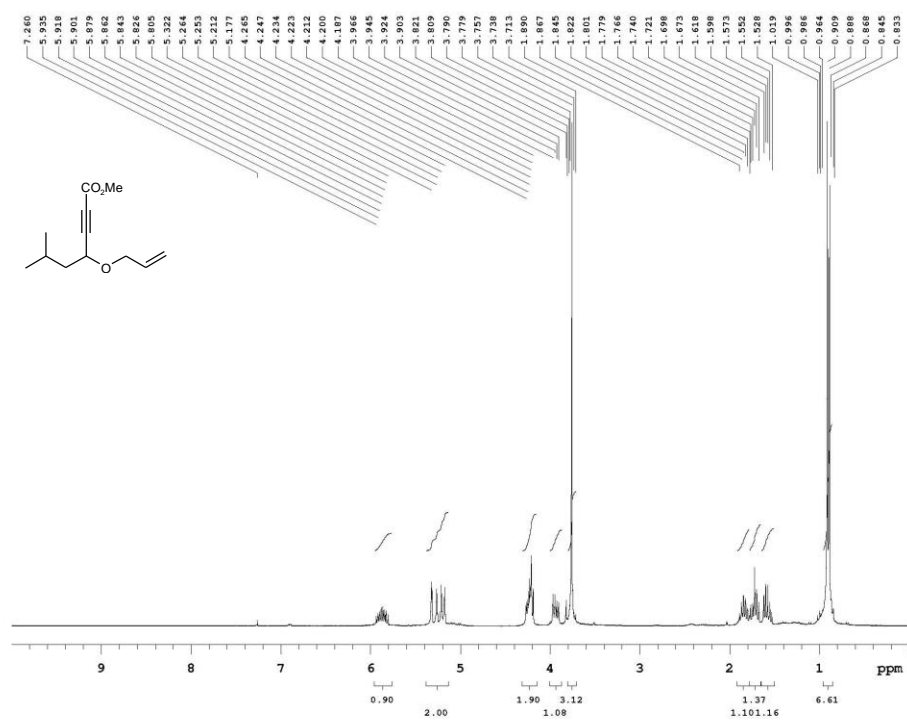

### <sup>13</sup>C NMR Spectrum of **E3** in CDCl<sub>3</sub>

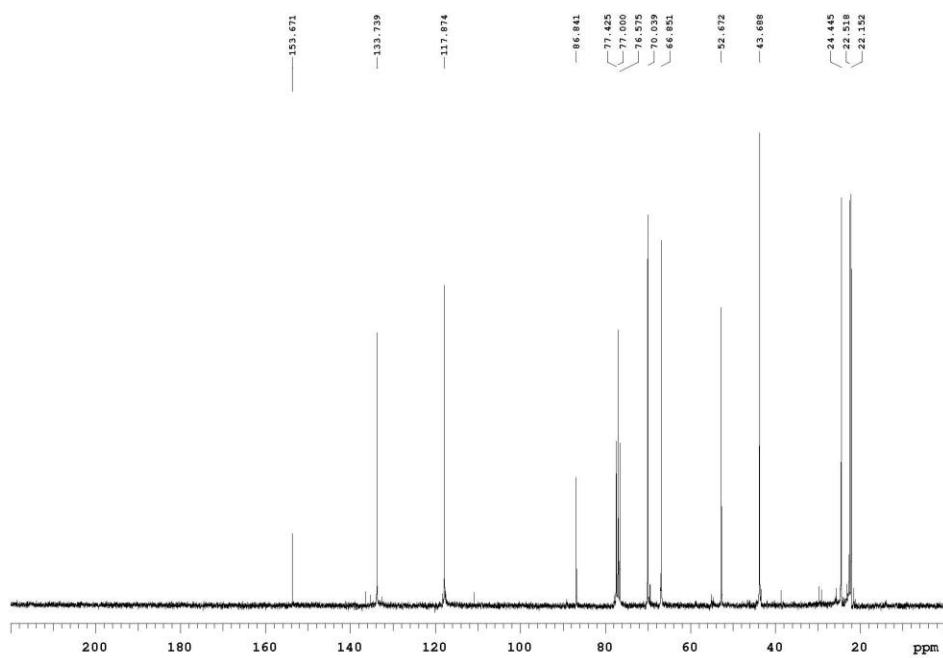

### <sup>1</sup>H NMR Spectrum of **E4** in CDCl<sub>3</sub>

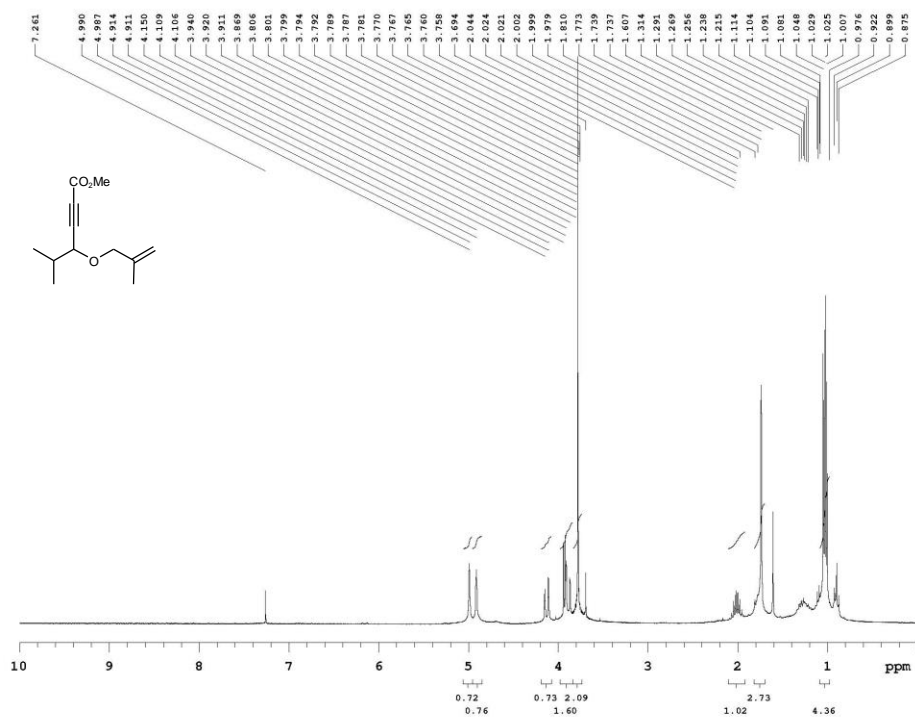

### <sup>13</sup>C NMR Spectrum of **E4** in CDCl<sub>3</sub>

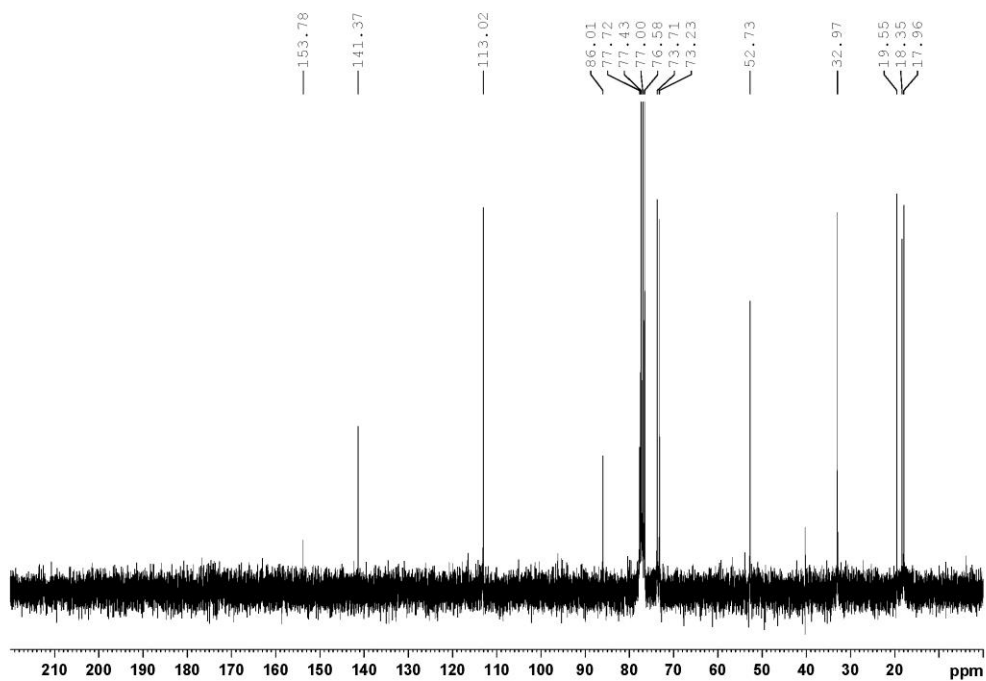

### $^1\text{H}$ NMR Spectrum of **E5** in $\text{CDCl}_3$

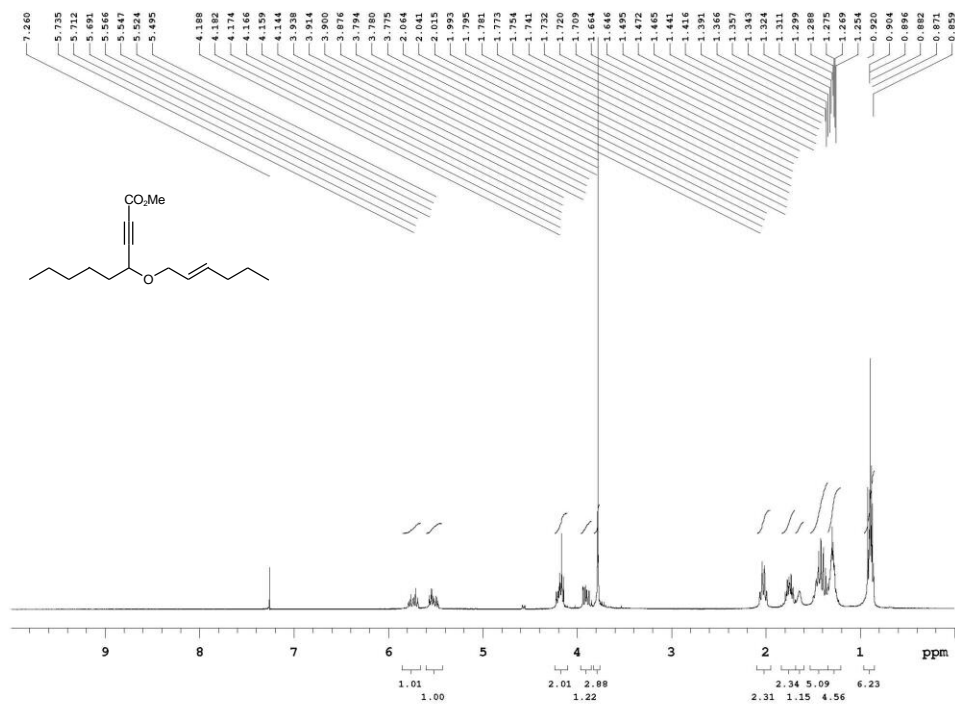

### $^{13}\text{C}$ NMR Spectrum of **E5** in $\text{CDCl}_3$

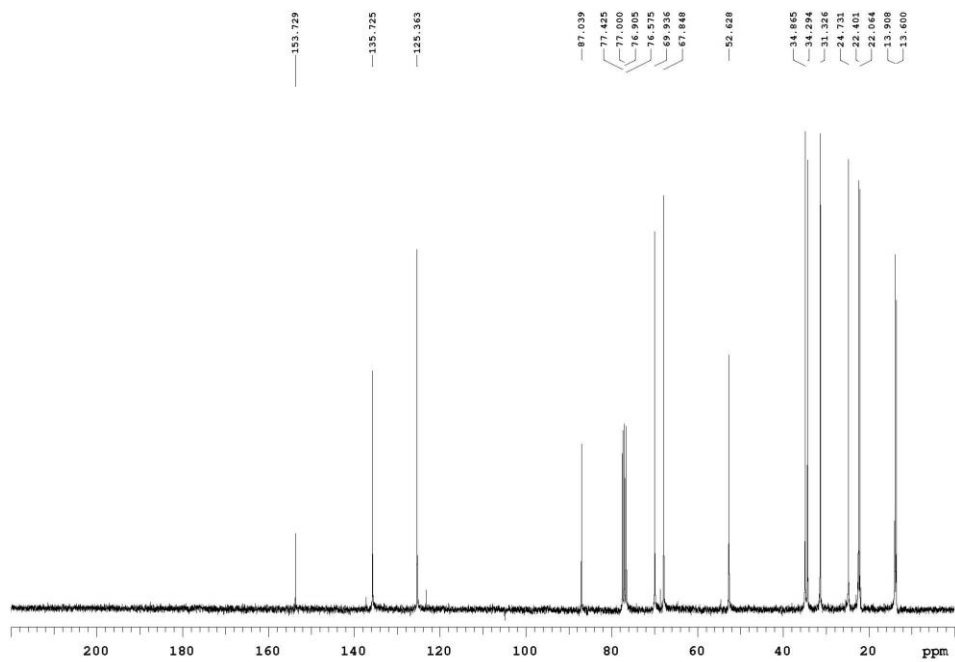

### $^1\text{H}$ NMR Spectrum of **E6** in $\text{CDCl}_3$

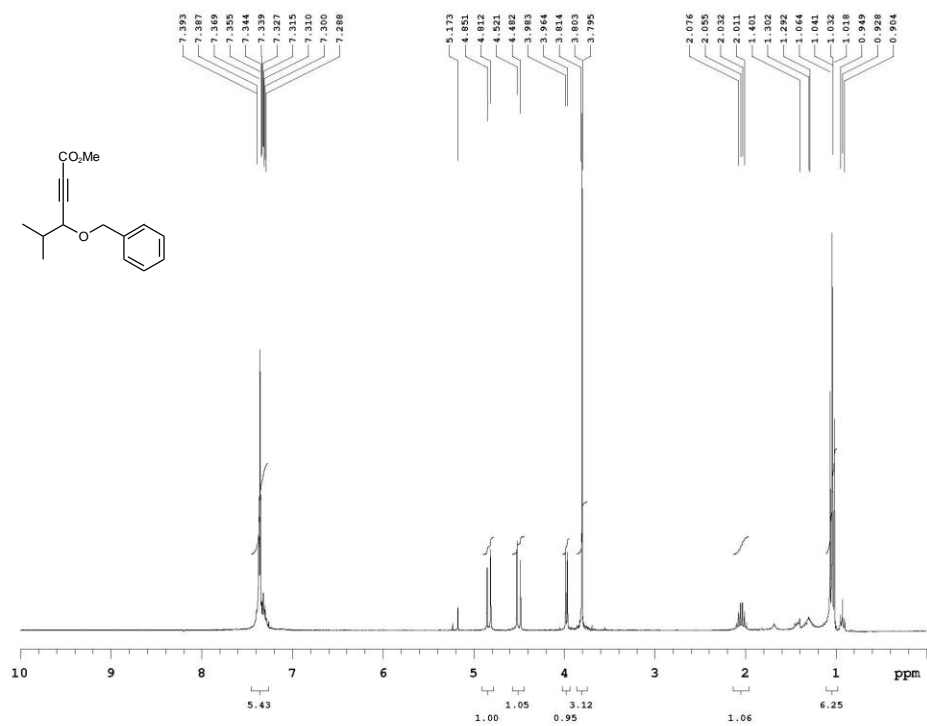

### $^{13}\text{C}$ NMR Spectrum of **E6** in $\text{CDCl}_3$

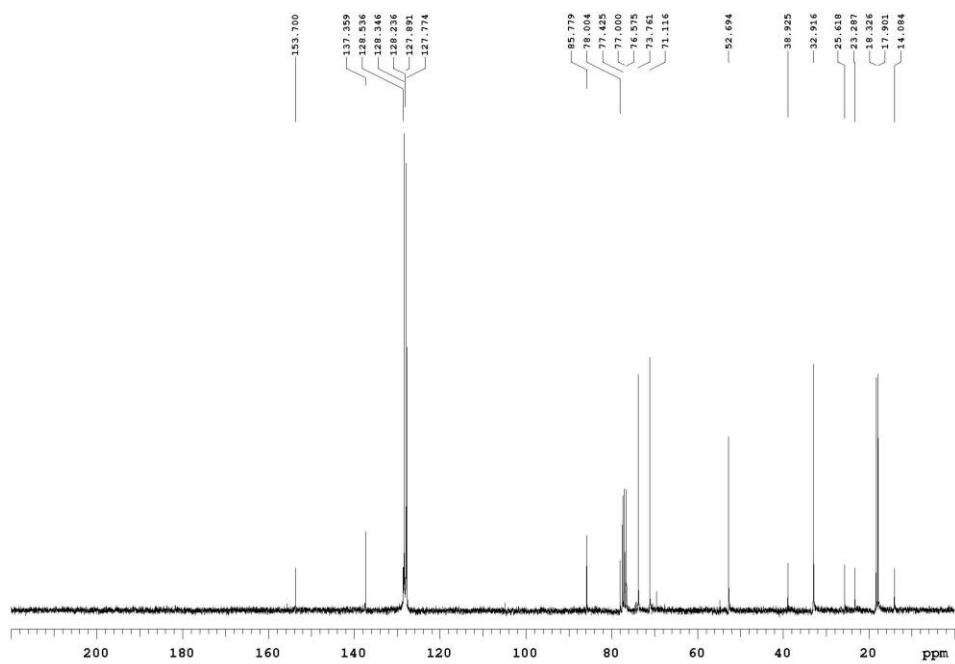

### <sup>1</sup>H NMR Spectrum of **E7** in CDCl<sub>3</sub>

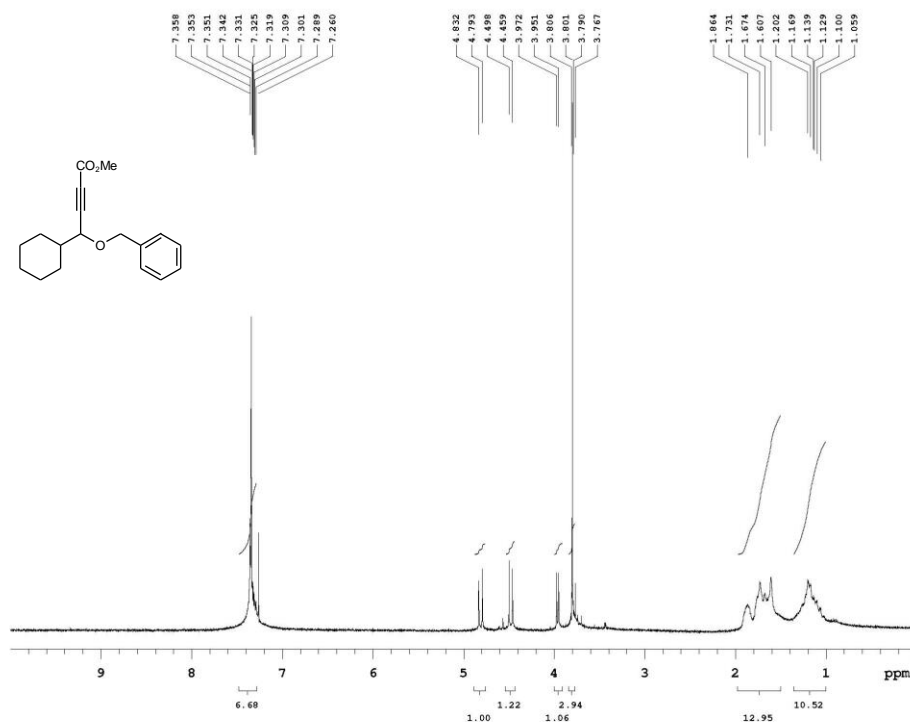

### <sup>13</sup>C NMR Spectrum of **E7** in CDCl<sub>3</sub>

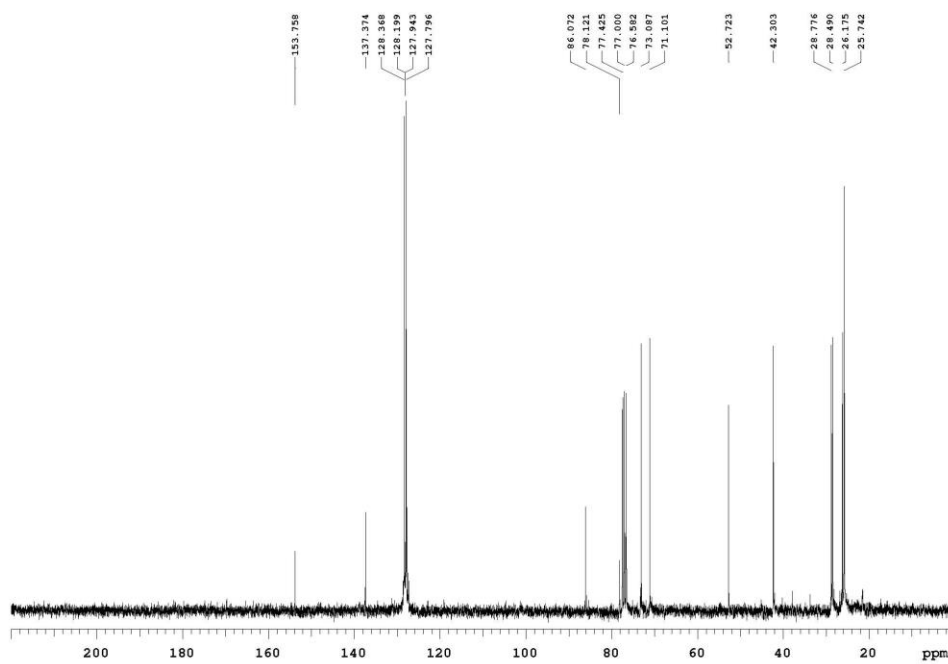

### $^1\text{H}$ NMR Spectrum of **E8** in $\text{CDCl}_3$

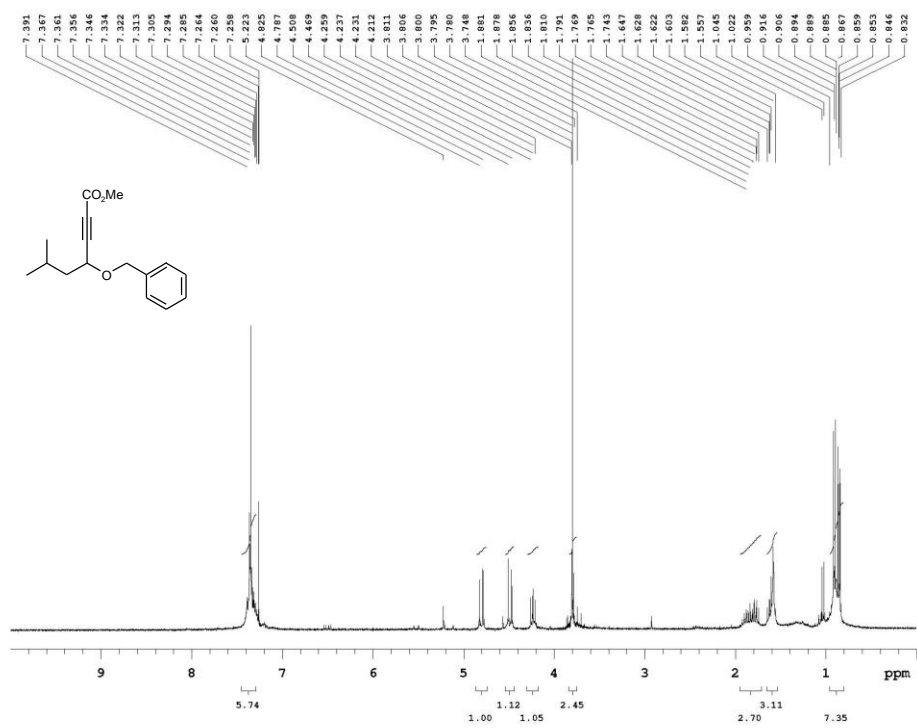

### $^{13}\text{C}$ NMR Spectrum of **E8** in $\text{CDCl}_3$

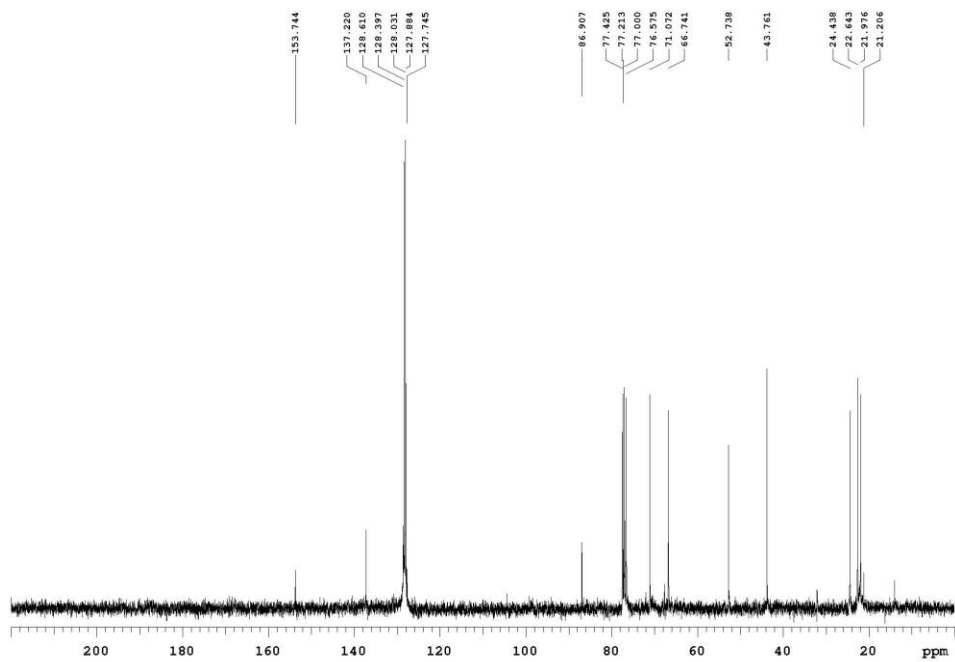

### <sup>1</sup>H NMR Spectrum of **E9** in CDCl<sub>3</sub>

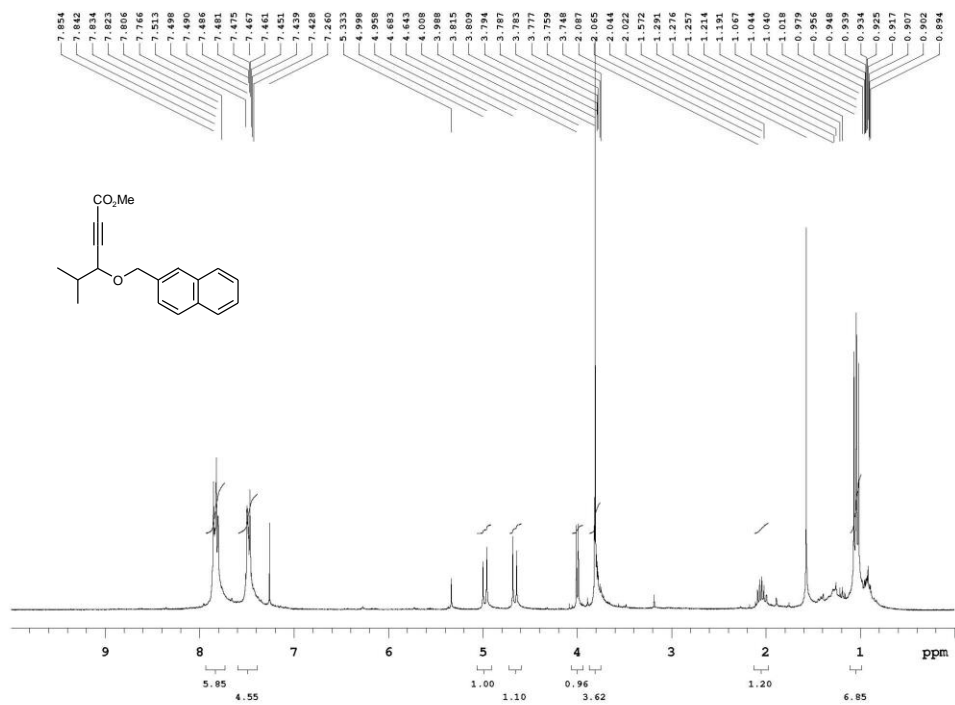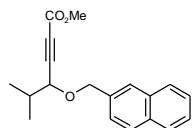

### <sup>13</sup>C NMR Spectrum of **E9** in CDCl<sub>3</sub>

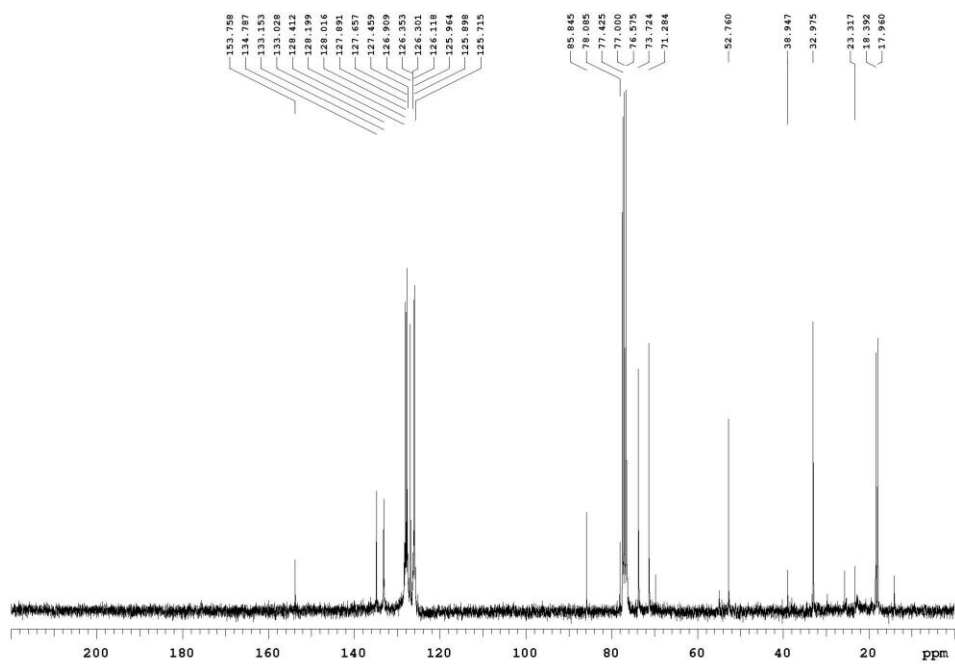

<sup>1</sup>H NMR Spectrum of **11b** in CDCl<sub>3</sub>

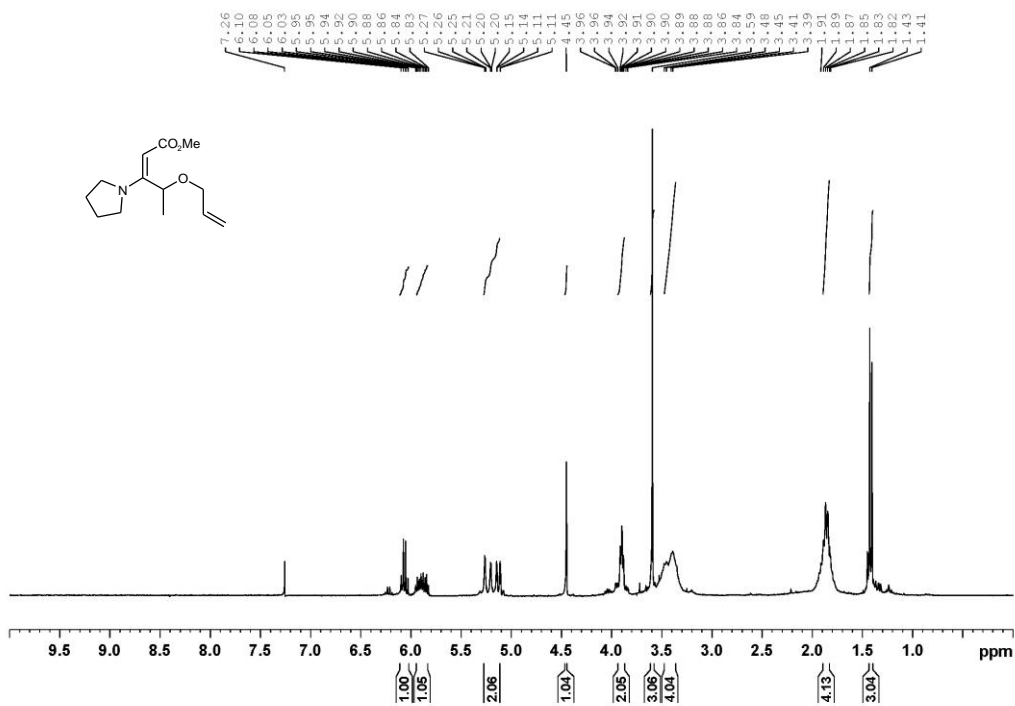

<sup>13</sup>C NMR Spectrum of **11b** in CDCl<sub>3</sub>

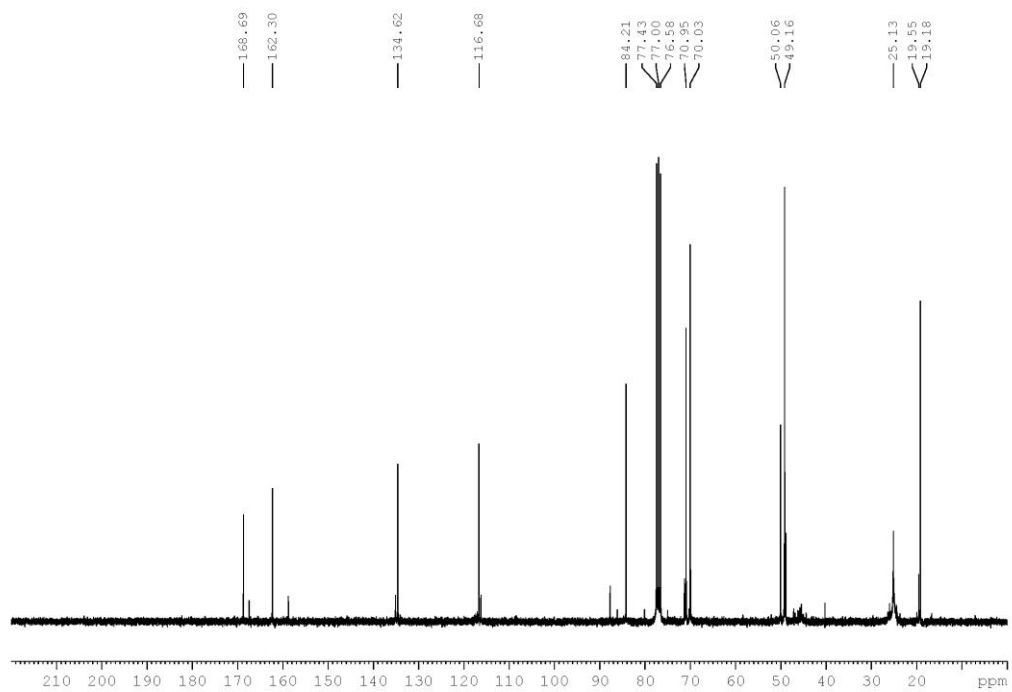



### $^1\text{H}$ NMR Spectrum of **11e** in $\text{CDCl}_3$

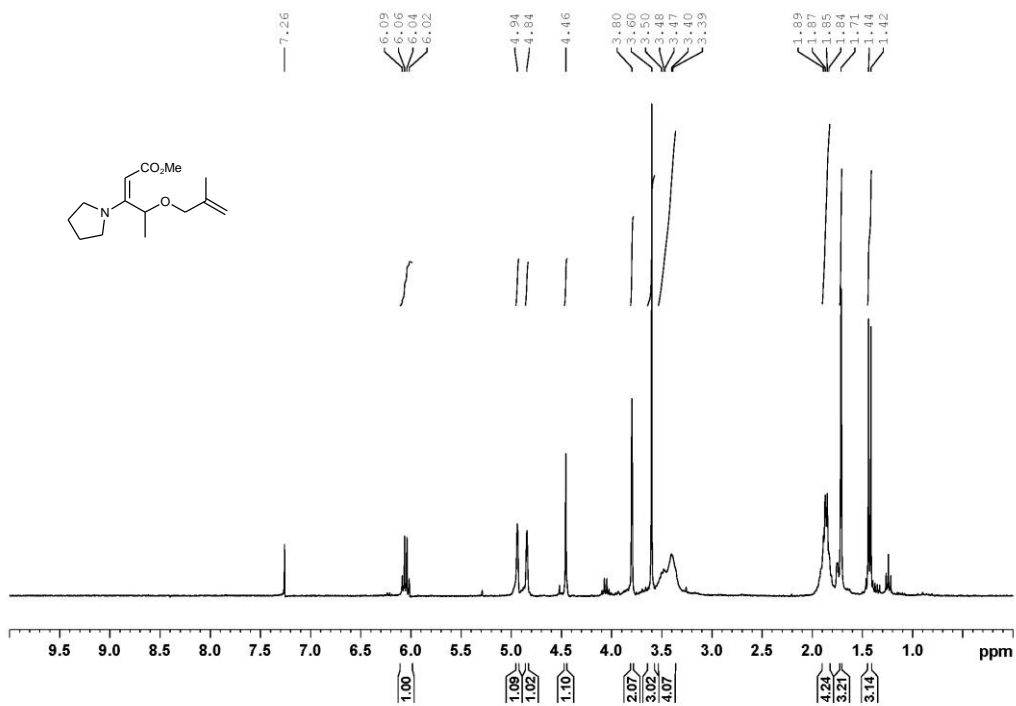

### $^{13}\text{C}$ NMR Spectrum of **11e** in $\text{CDCl}_3$

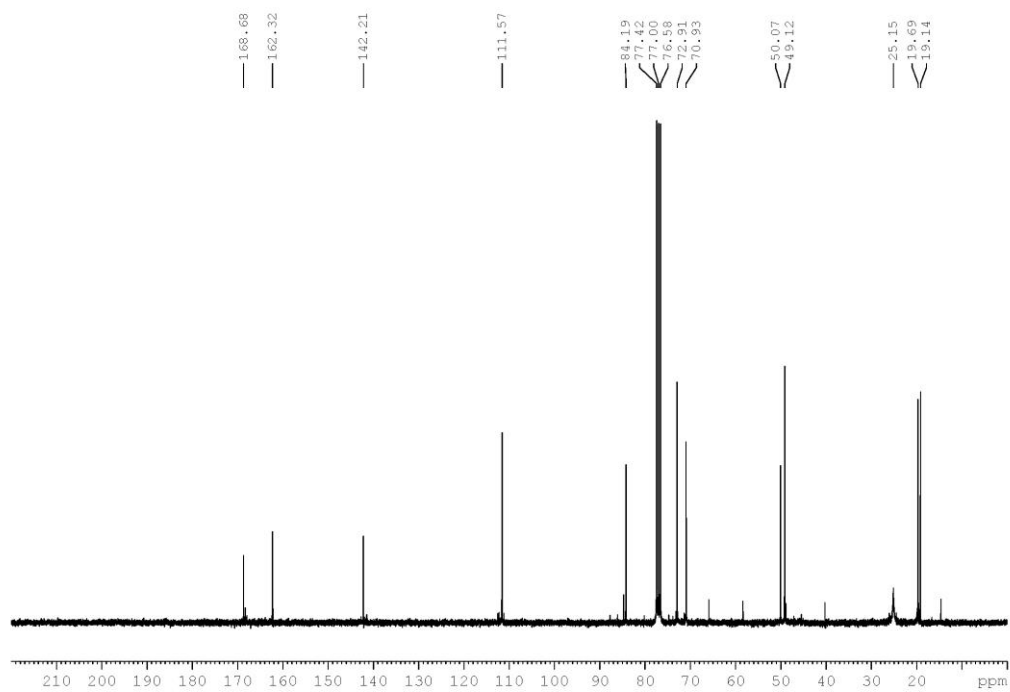

### <sup>1</sup>H NMR Spectrum of **11g** in CDCl<sub>3</sub>

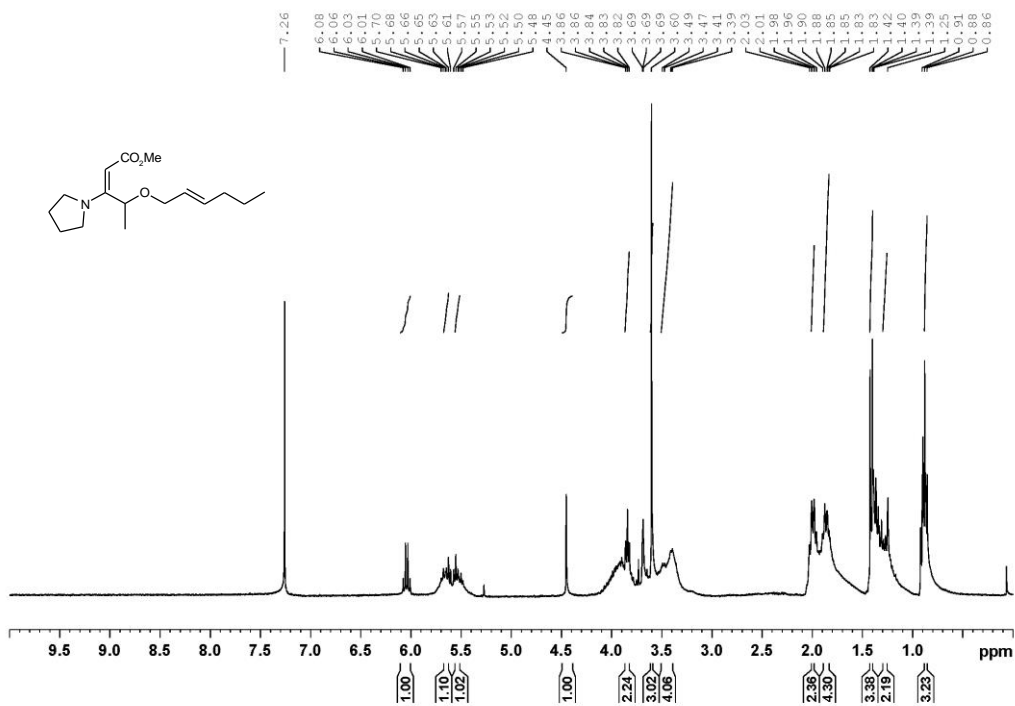

### <sup>13</sup>C NMR Spectrum of **11g** in CDCl<sub>3</sub>

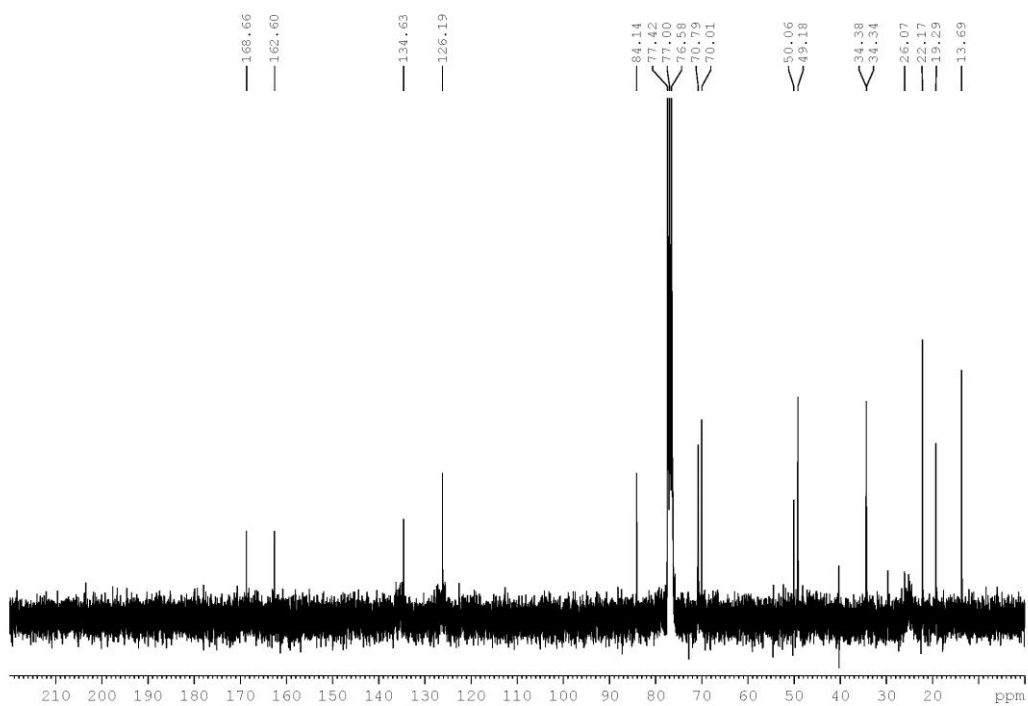

### <sup>1</sup>H NMR Spectrum of **11i** in CDCl<sub>3</sub>

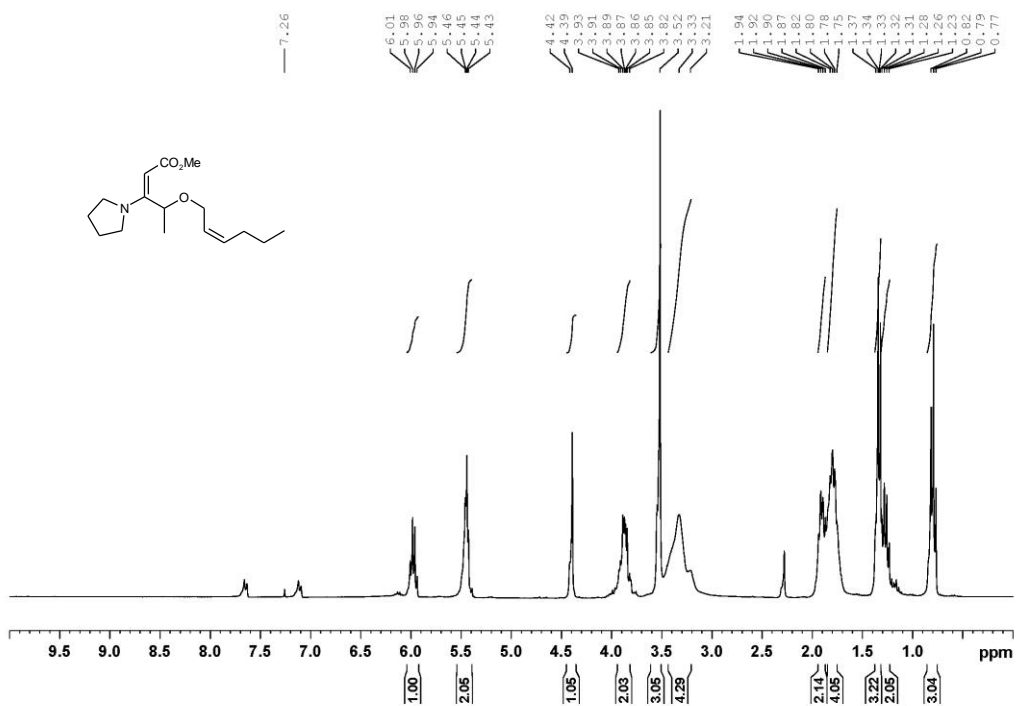

### <sup>13</sup>C NMR Spectrum of **11i** in CDCl<sub>3</sub>

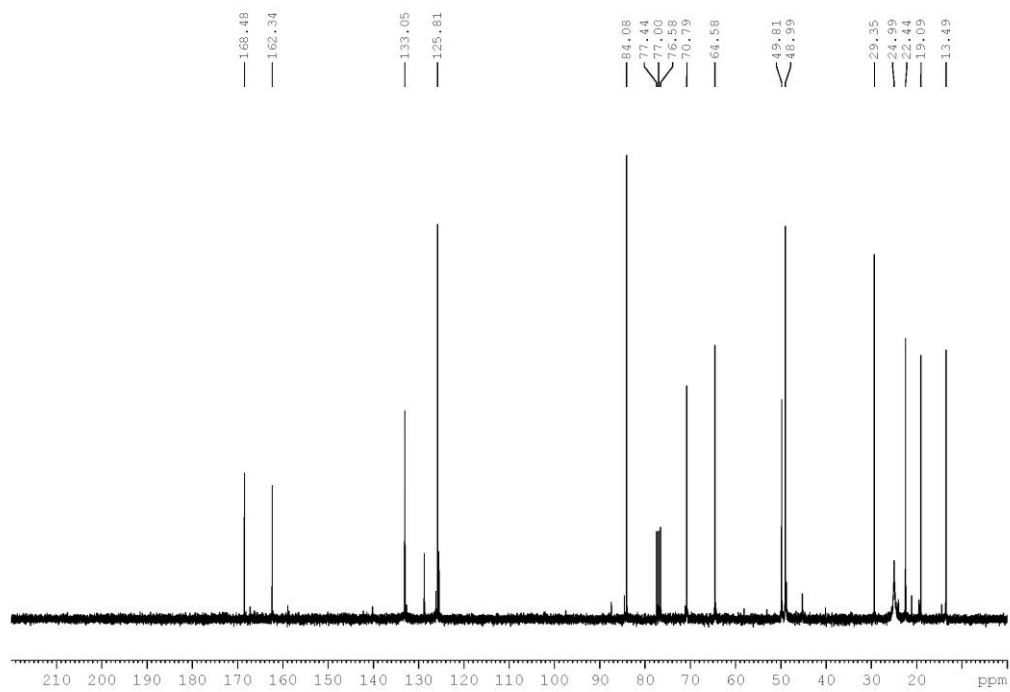

<sup>1</sup>H NMR Spectrum of **11j** in CDCl<sub>3</sub>

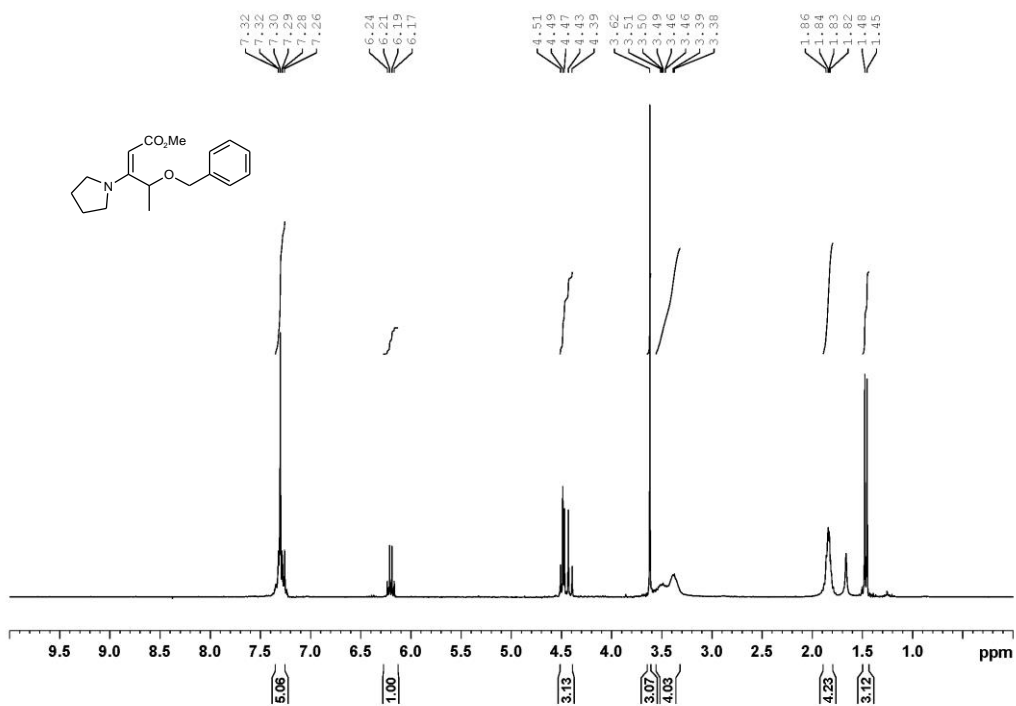

<sup>13</sup>C NMR Spectrum of **11j** in CDCl<sub>3</sub>

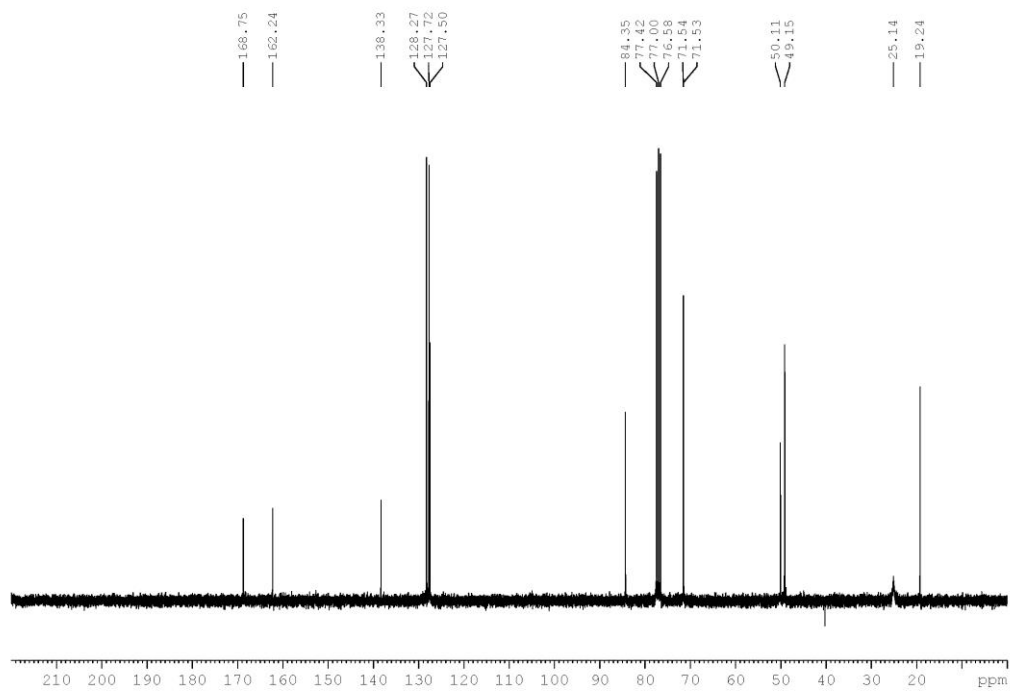

### <sup>1</sup>H NMR Spectrum of **11a** in CDCl<sub>3</sub>

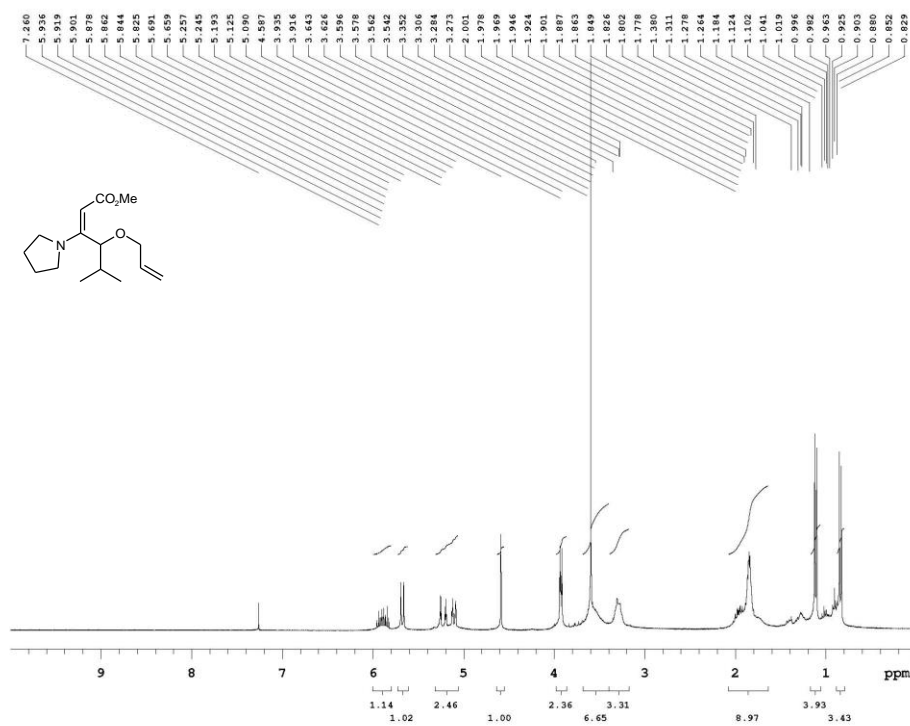

### <sup>13</sup>C NMR Spectrum of **11a** in CDCl<sub>3</sub>

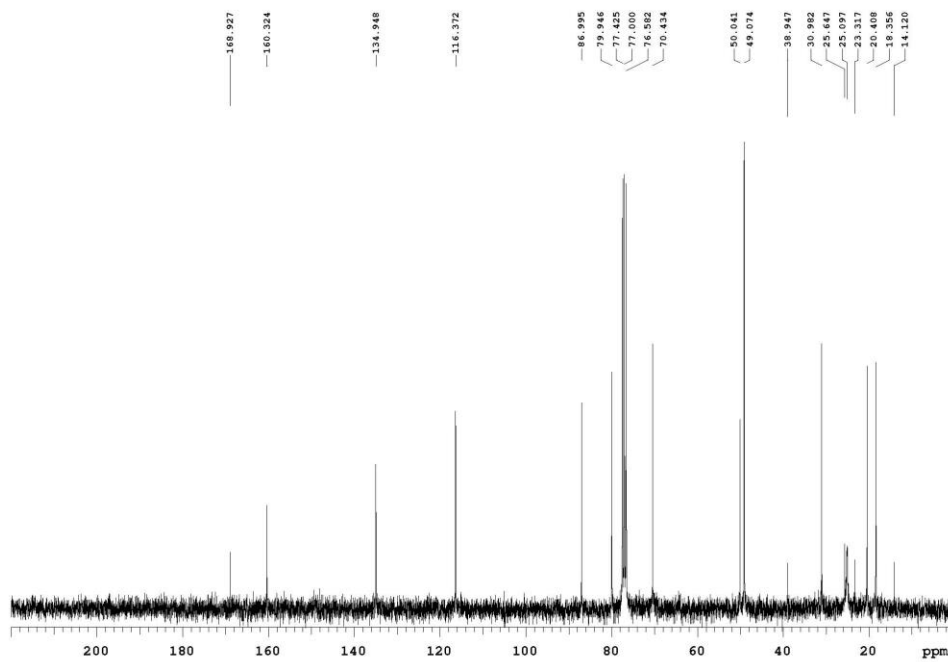

### <sup>1</sup>H NMR Spectrum of **11c** in CDCl<sub>3</sub>

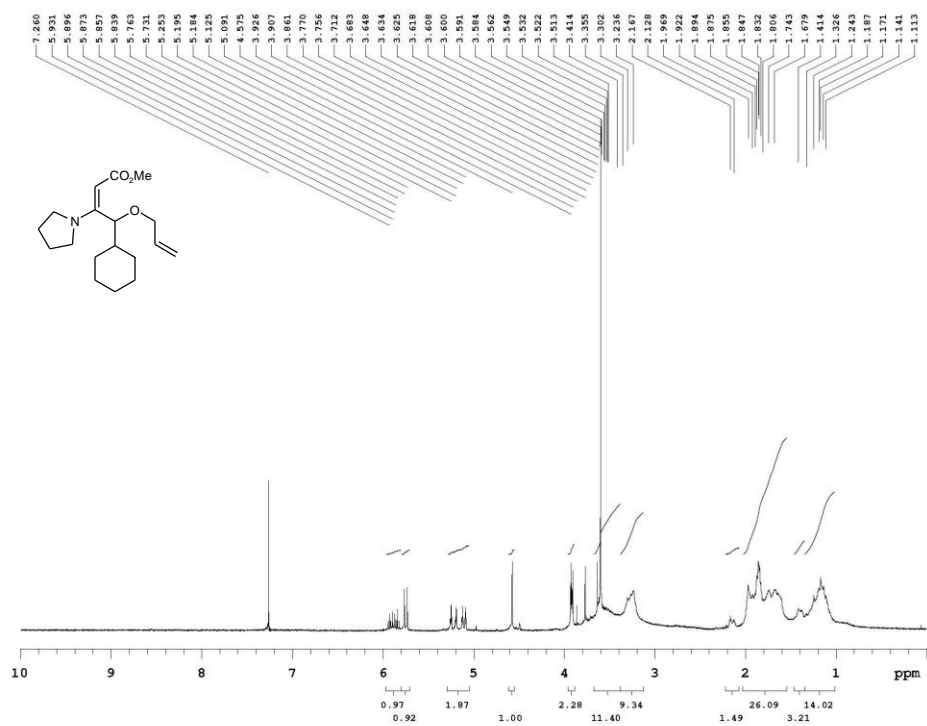

### <sup>13</sup>C NMR Spectrum of **11c** in CDCl<sub>3</sub>

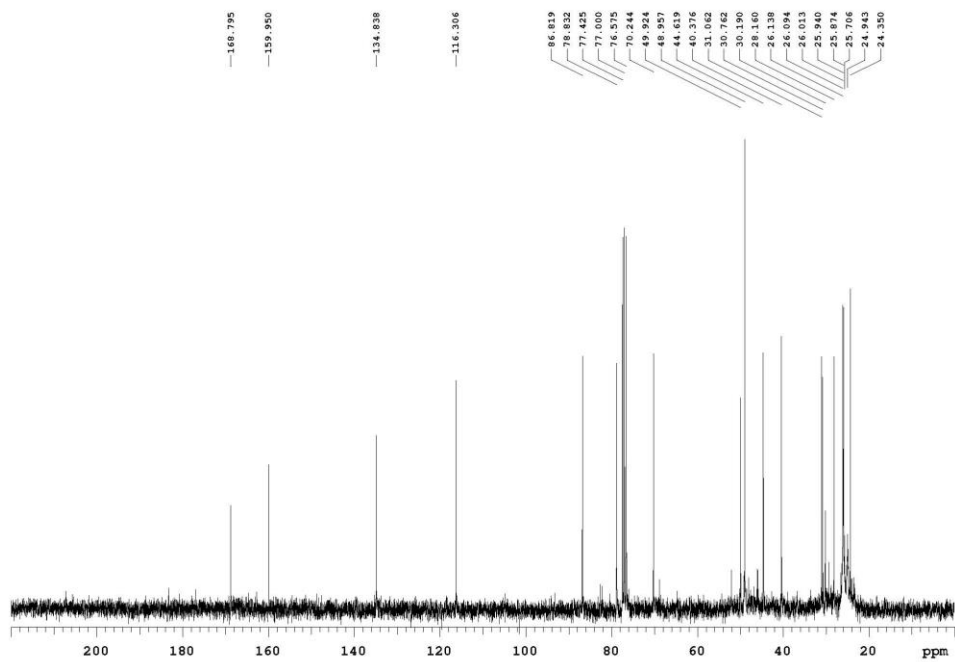

# <sup>1</sup>H NMR Spectrum of **11d** in CDCl<sub>3</sub>

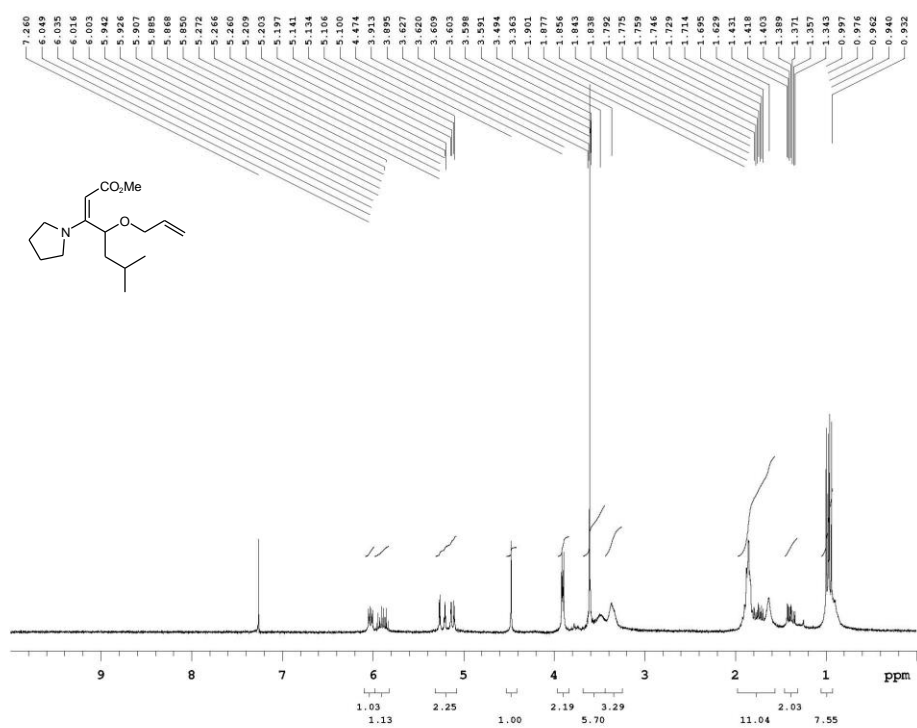

# <sup>13</sup>C NMR Spectrum of **11d** in CDCl<sub>3</sub>

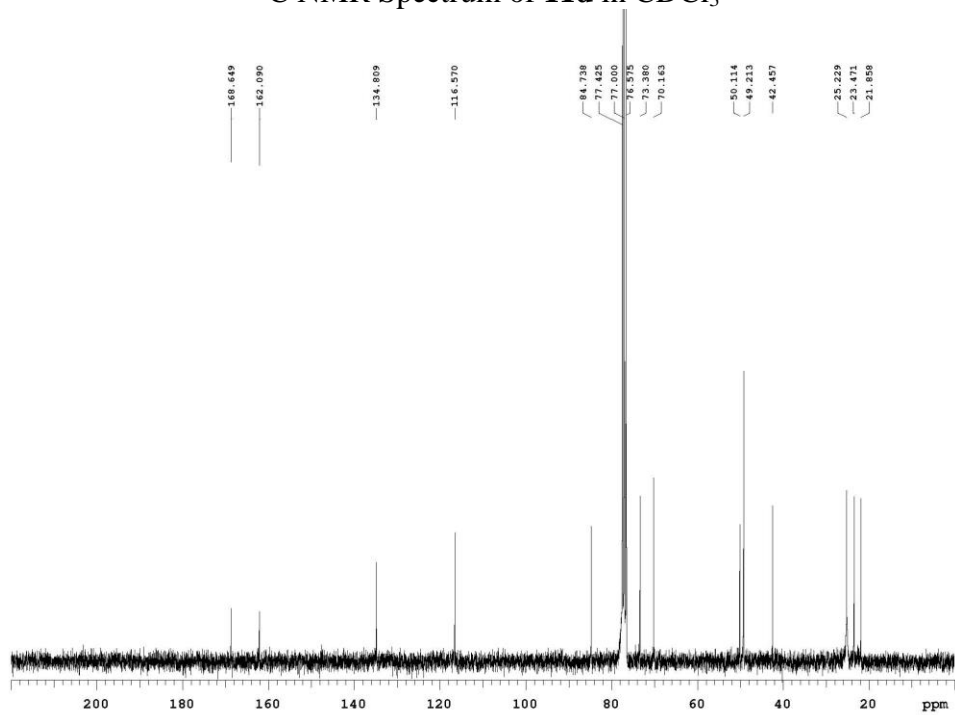

### $^1\text{H}$ NMR Spectrum of **11f** in $\text{CDCl}_3$

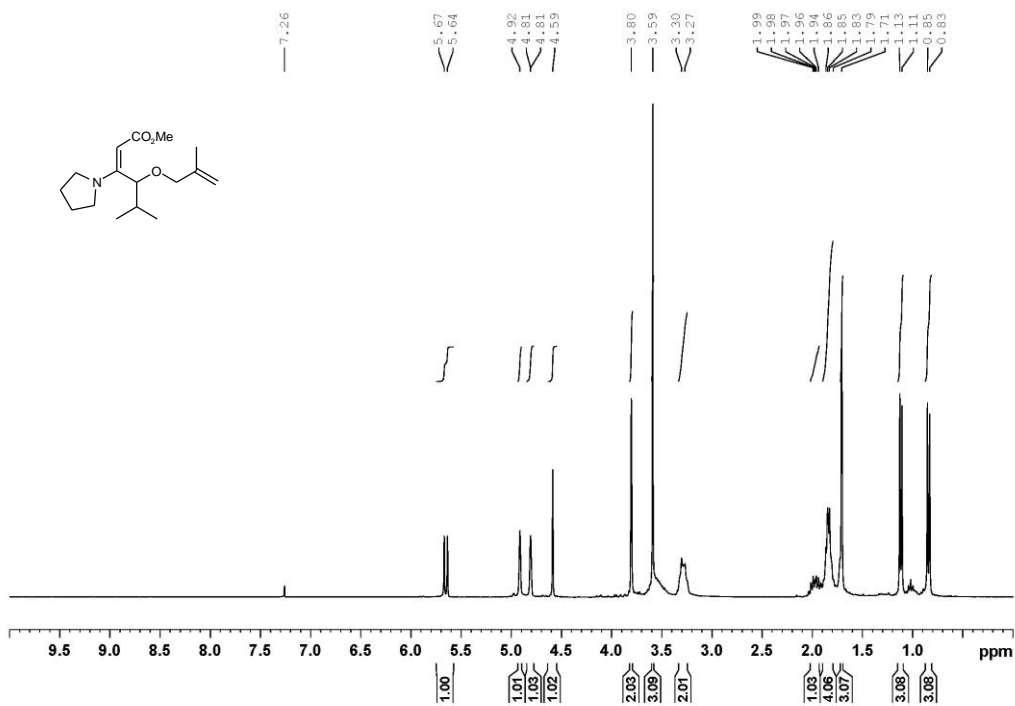

### $^{13}\text{C}$ NMR Spectrum of **11f** in $\text{CDCl}_3$

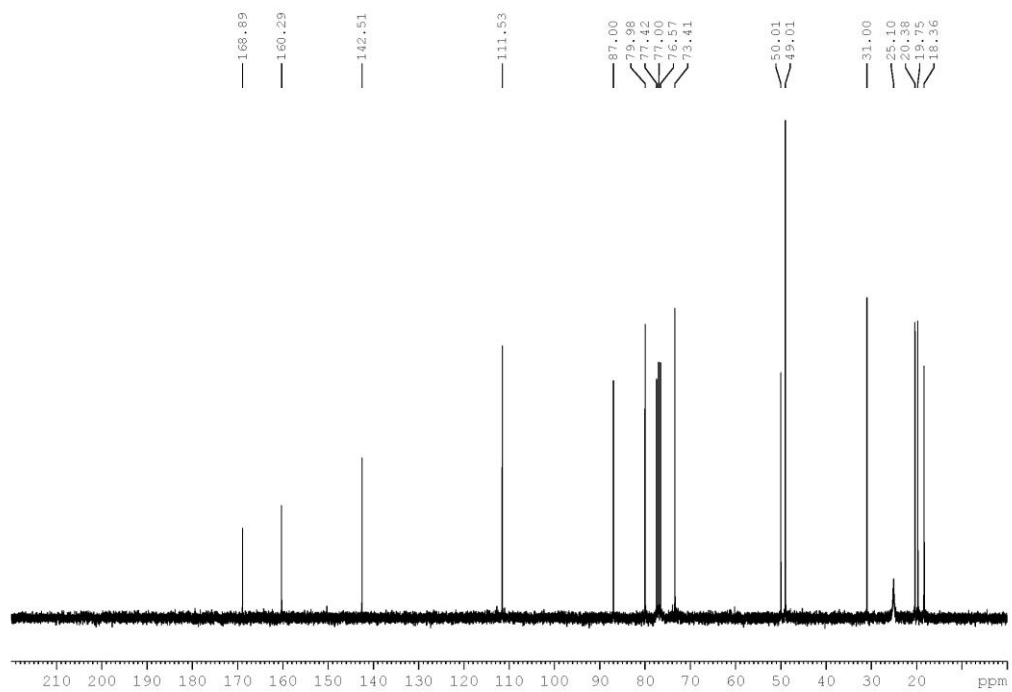



### <sup>1</sup>H NMR Spectrum of **11h** in CDCl<sub>3</sub>

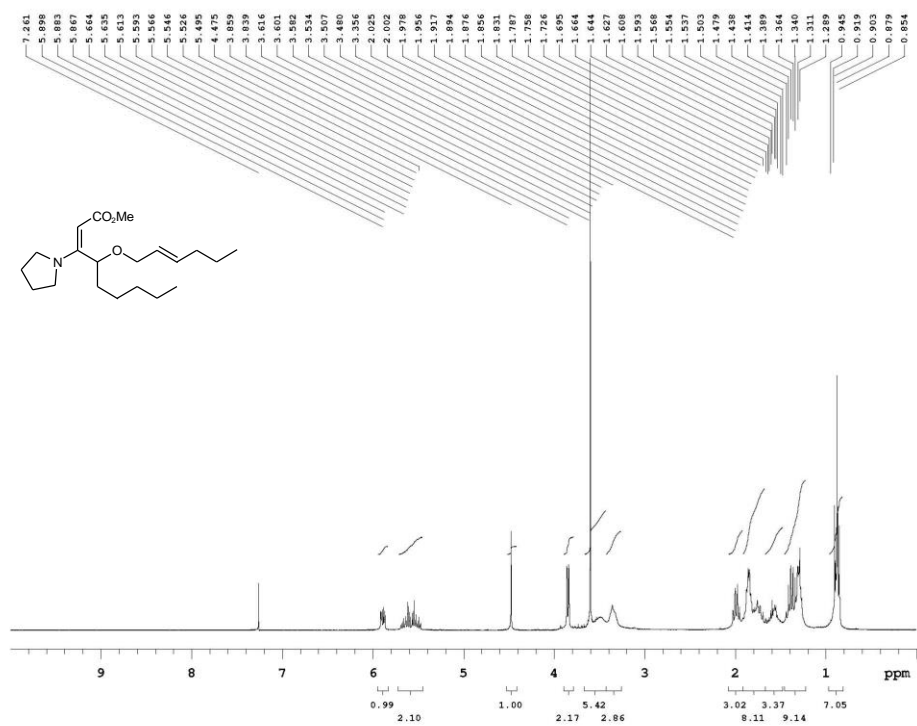

### <sup>13</sup>C NMR Spectrum of **11h** in CDCl<sub>3</sub>

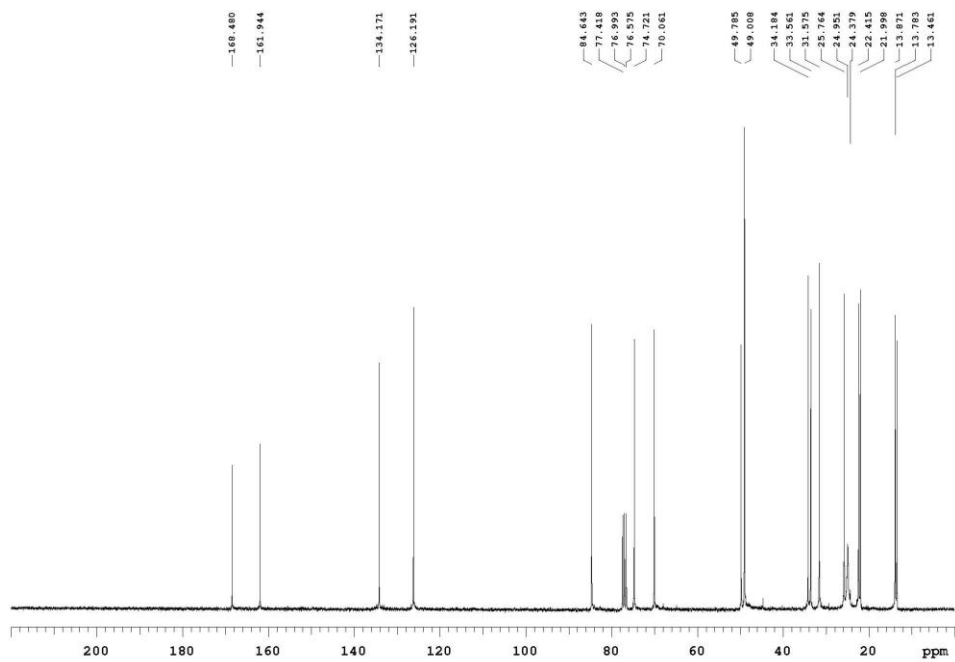

### <sup>1</sup>H NMR Spectrum of **11k** in CDCl<sub>3</sub>

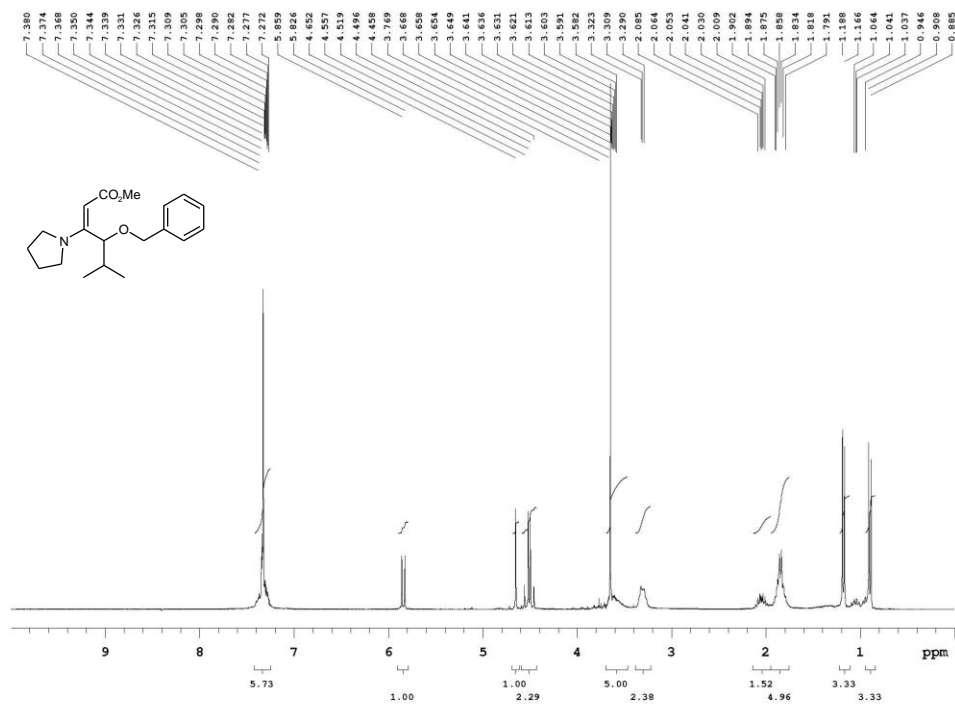

### <sup>13</sup>C NMR Spectrum of **11k** in CDCl<sub>3</sub>

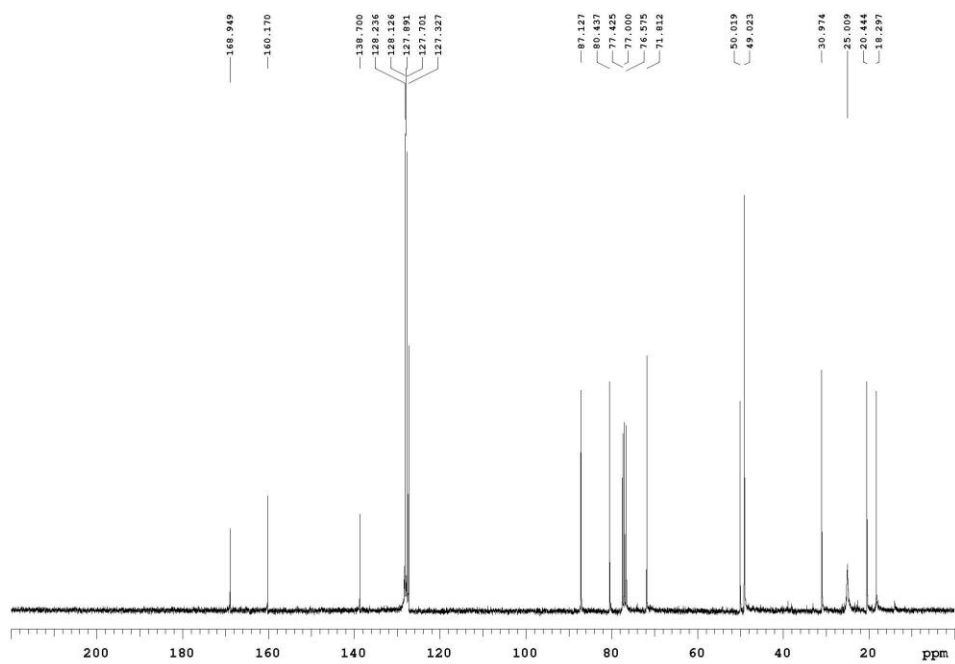

### <sup>1</sup>H NMR Spectrum of **11l** in CDCl<sub>3</sub>

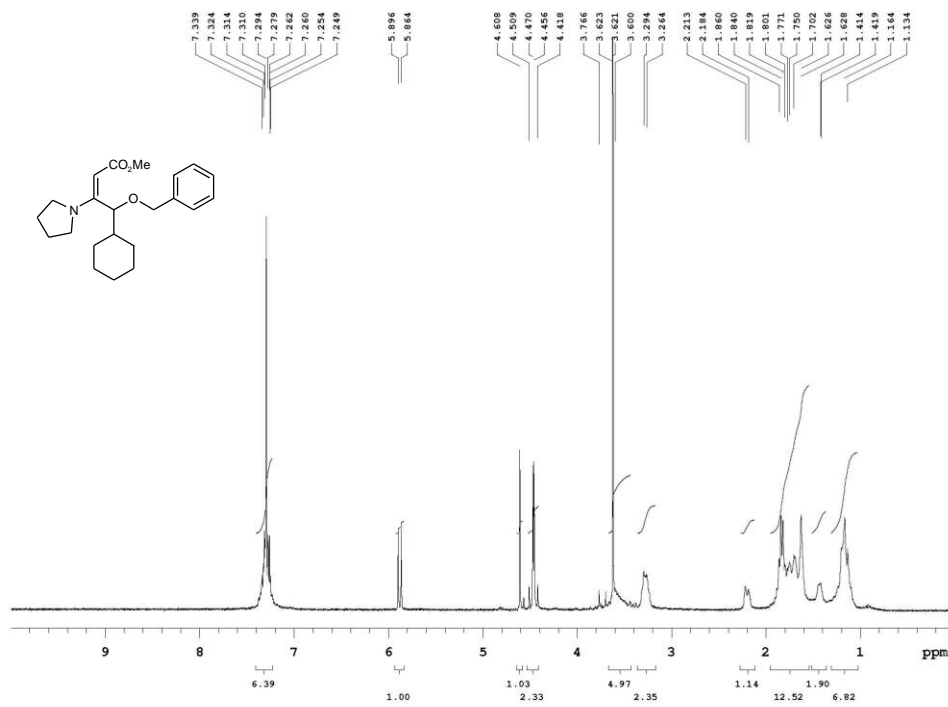

### <sup>13</sup>C NMR Spectrum of **11l** in CDCl<sub>3</sub>

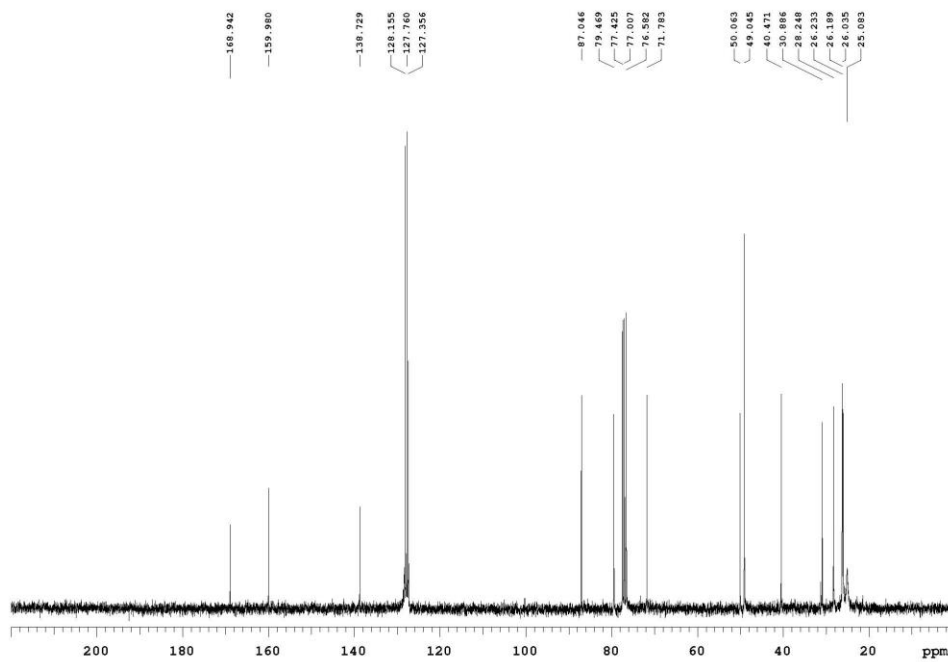

### $^1\text{H}$ NMR Spectrum of **11m** in $\text{CDCl}_3$

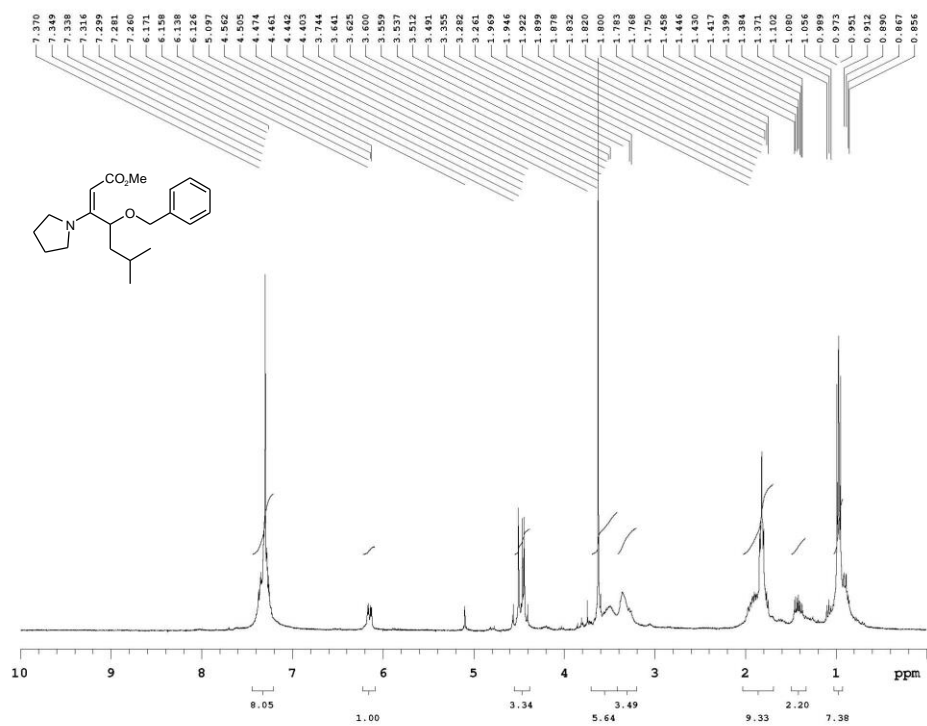

### $^{13}\text{C}$ NMR Spectrum of **11m** in $\text{CDCl}_3$

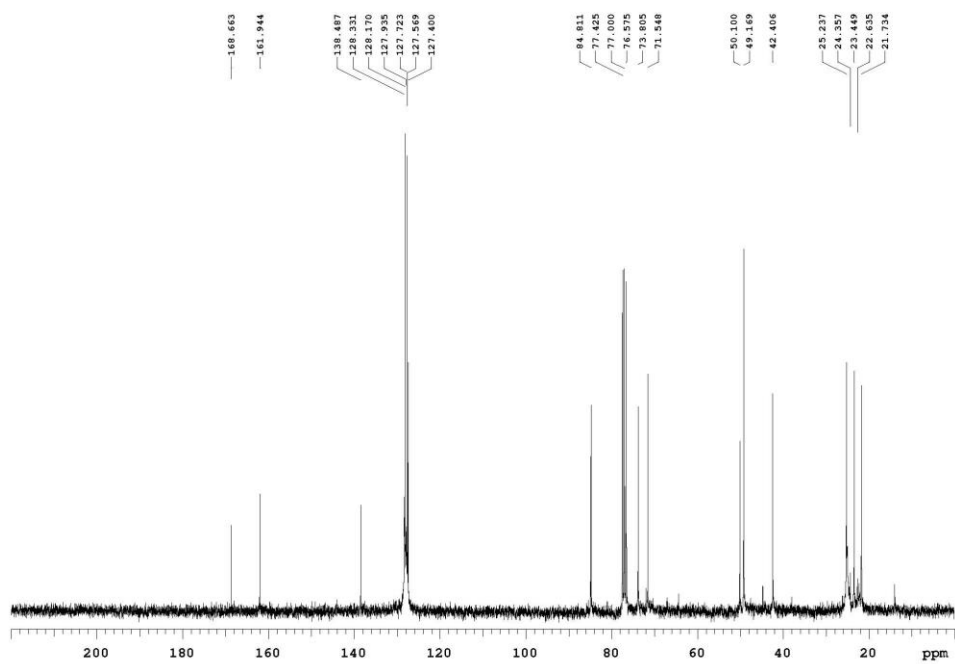

### <sup>1</sup>H NMR Spectrum of **11n** in CDCl<sub>3</sub>

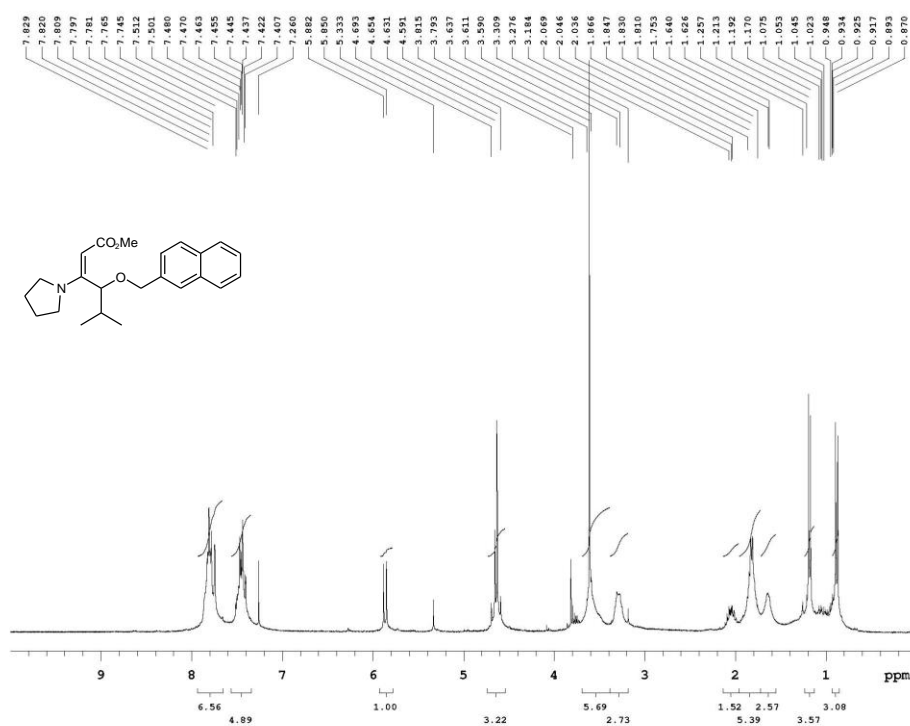

### <sup>13</sup>C NMR Spectrum of **11n** in CDCl<sub>3</sub>

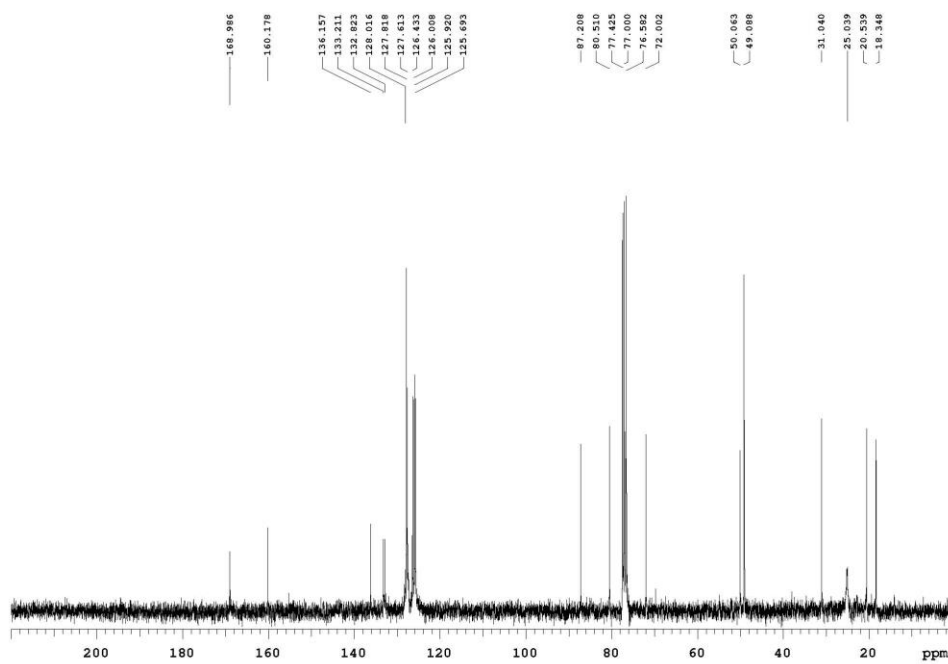

<sup>1</sup>H NMR Spectrum of **12a** in CDCl<sub>3</sub>

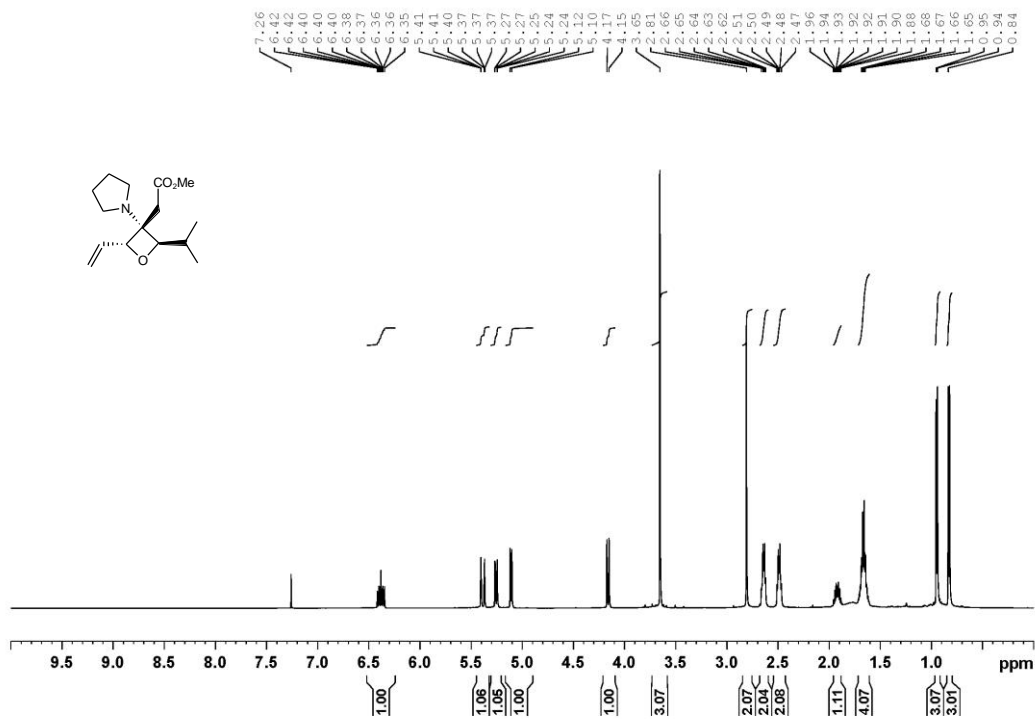

<sup>13</sup>C NMR Spectrum of **12a** in CDCl<sub>3</sub>

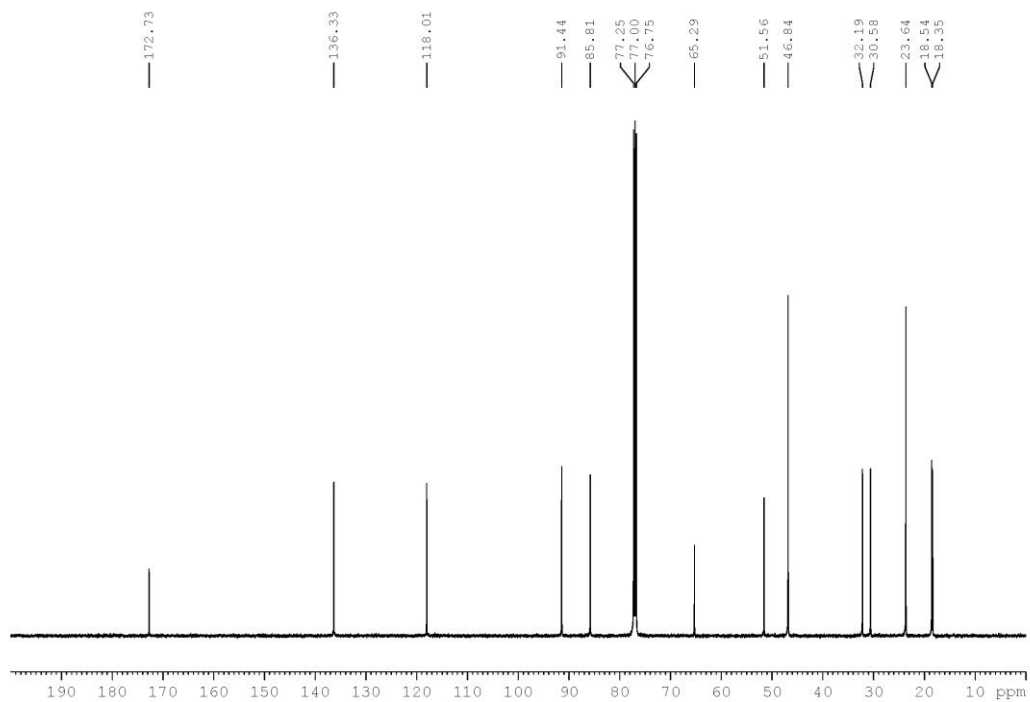

# NOESY Spectrum of 12a in CDCl<sub>3</sub>

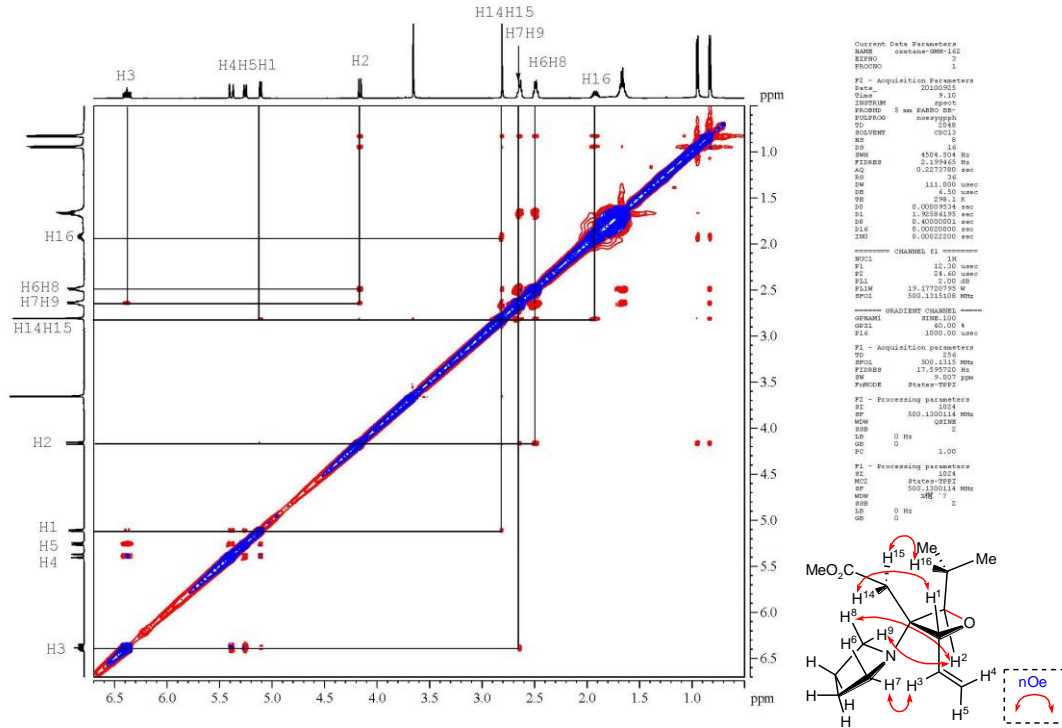

# HSQC Spectrum of 12a in CDCl<sub>3</sub>

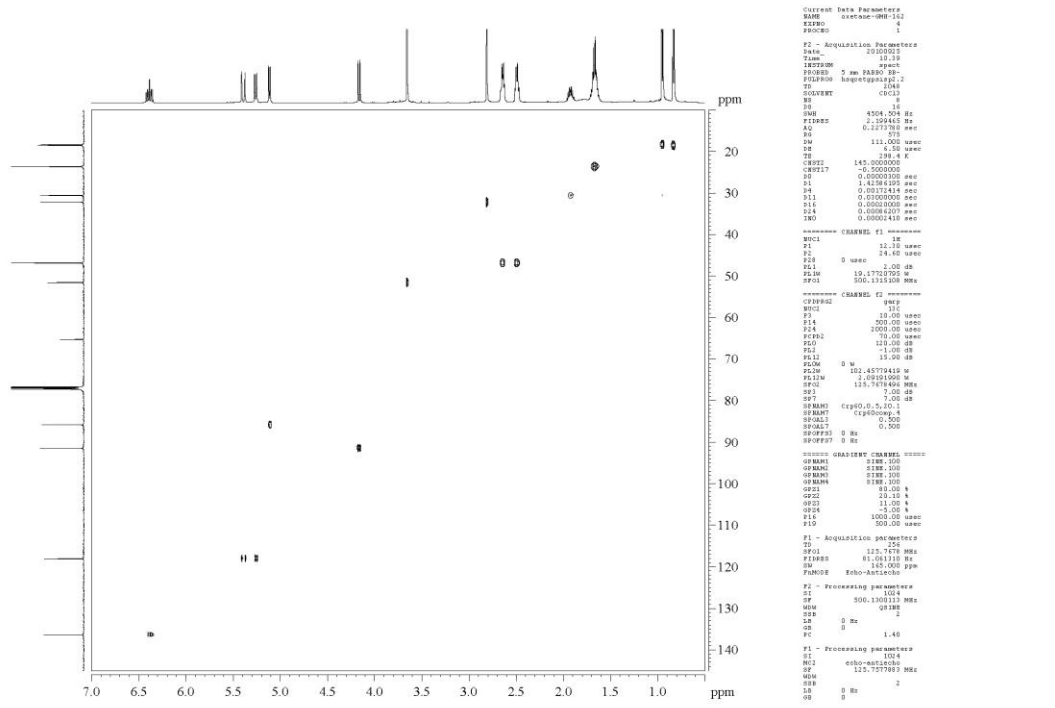

<sup>1</sup>H NMR Spectrum of **12b** in CDCl<sub>3</sub>

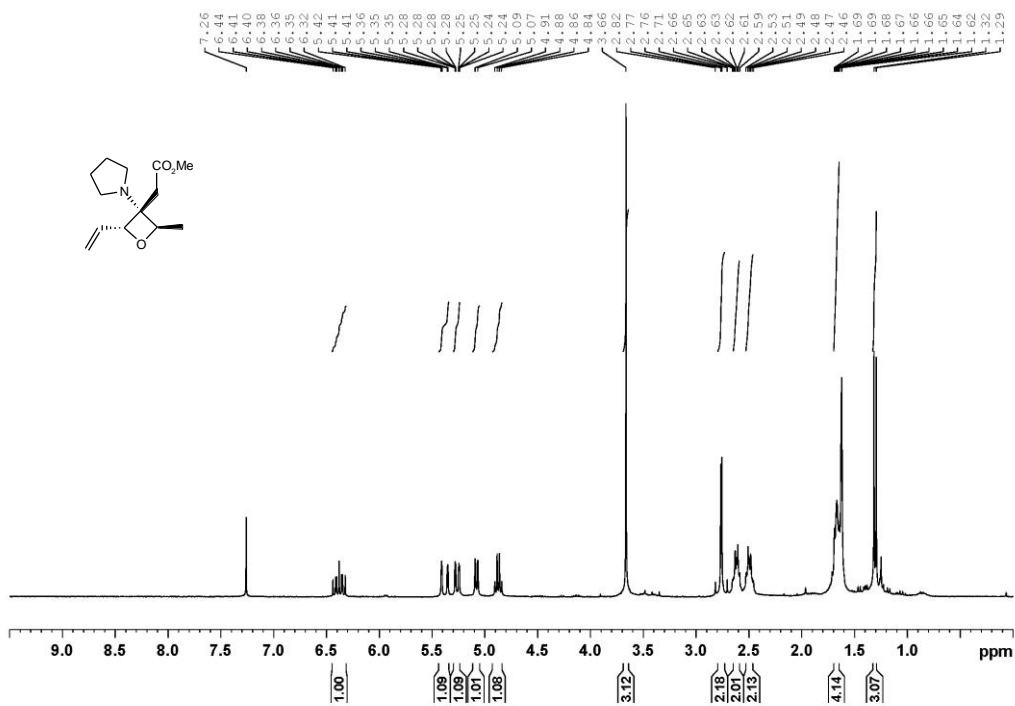

<sup>13</sup>C NMR Spectrum of **12b** in CDCl<sub>3</sub>

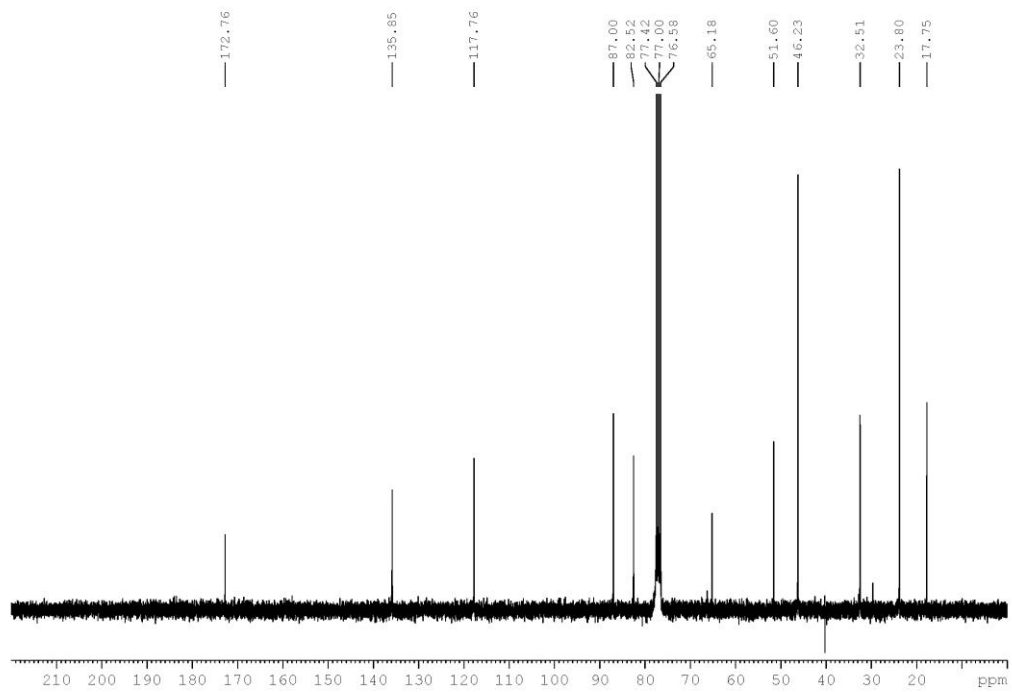



### $^1\text{H}$ NMR Spectrum of **12c** in $\text{CDCl}_3$

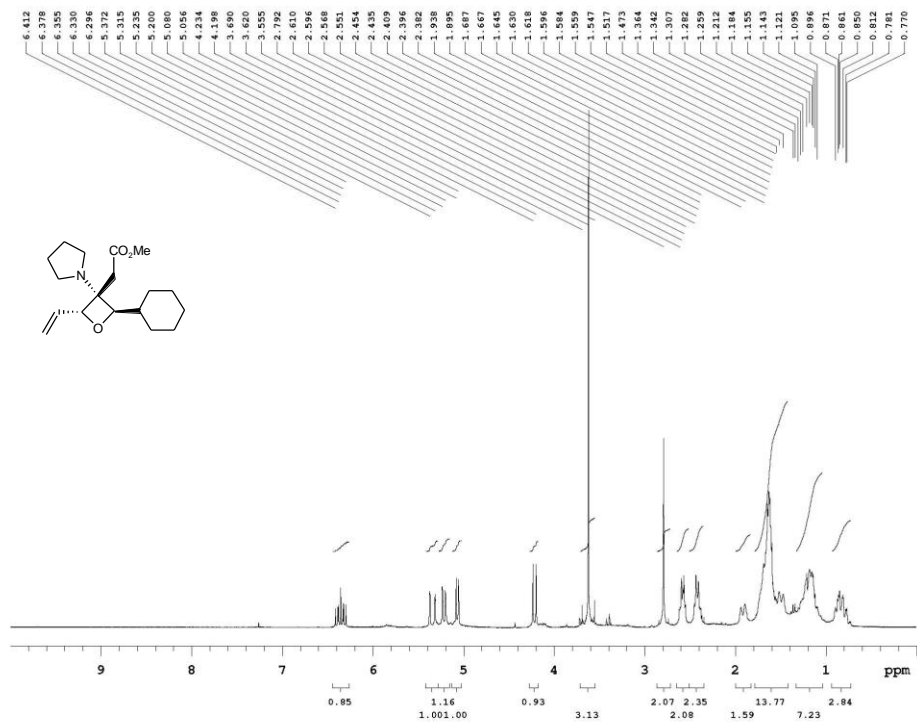

### $^{13}\text{C}$ NMR Spectrum of **12c** in $\text{CDCl}_3$

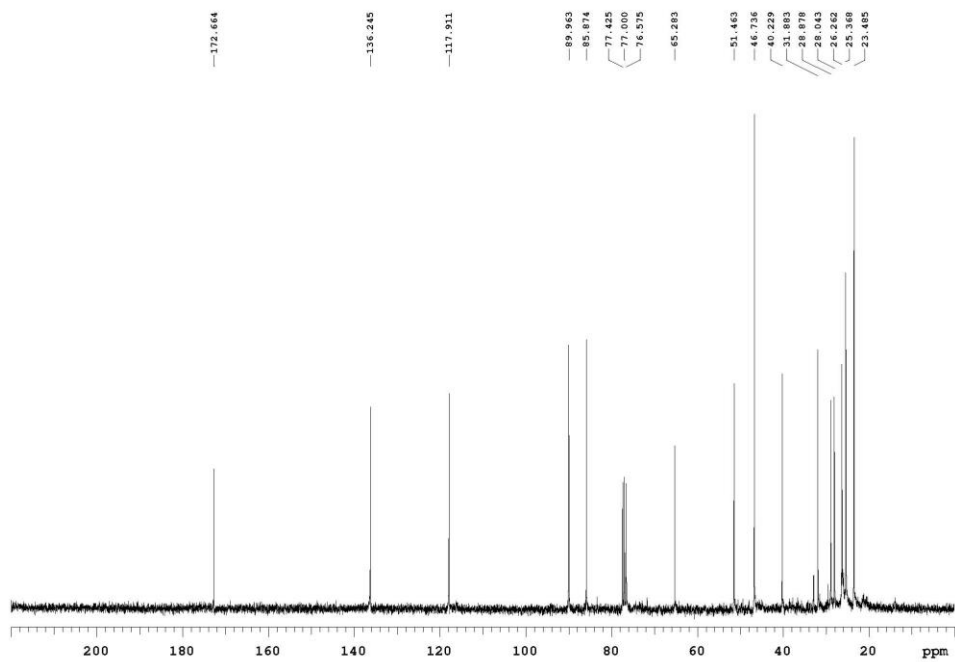

<sup>1</sup>H NMR Spectrum of **12d** in CDCl<sub>3</sub>

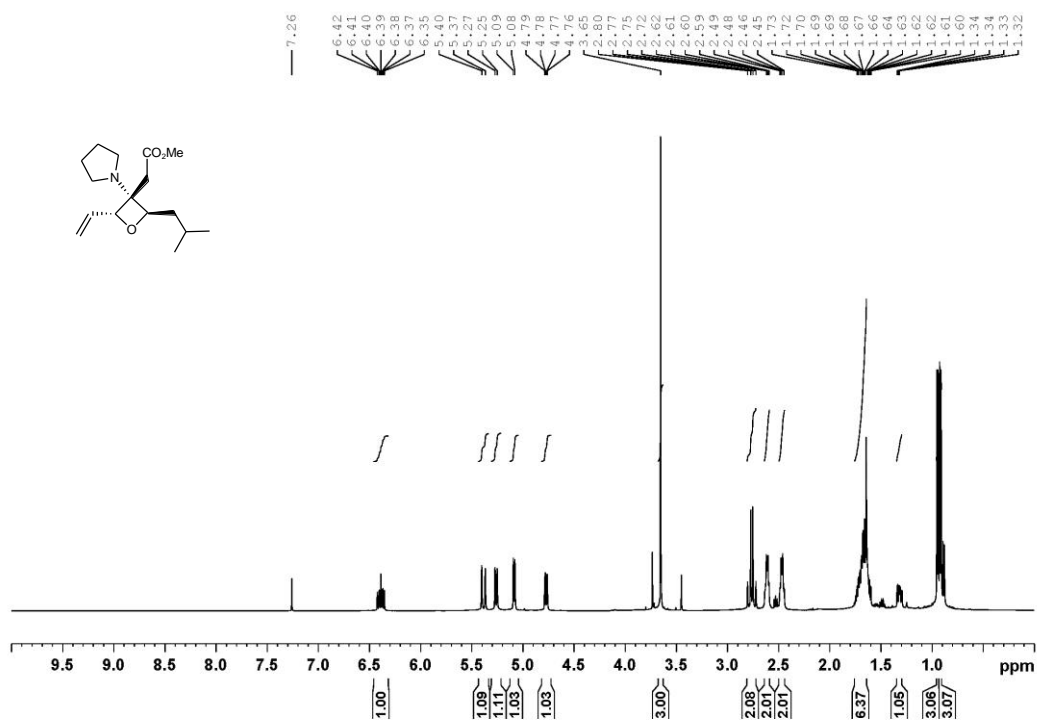

<sup>13</sup>C NMR Spectrum of **12d** in CDCl<sub>3</sub>

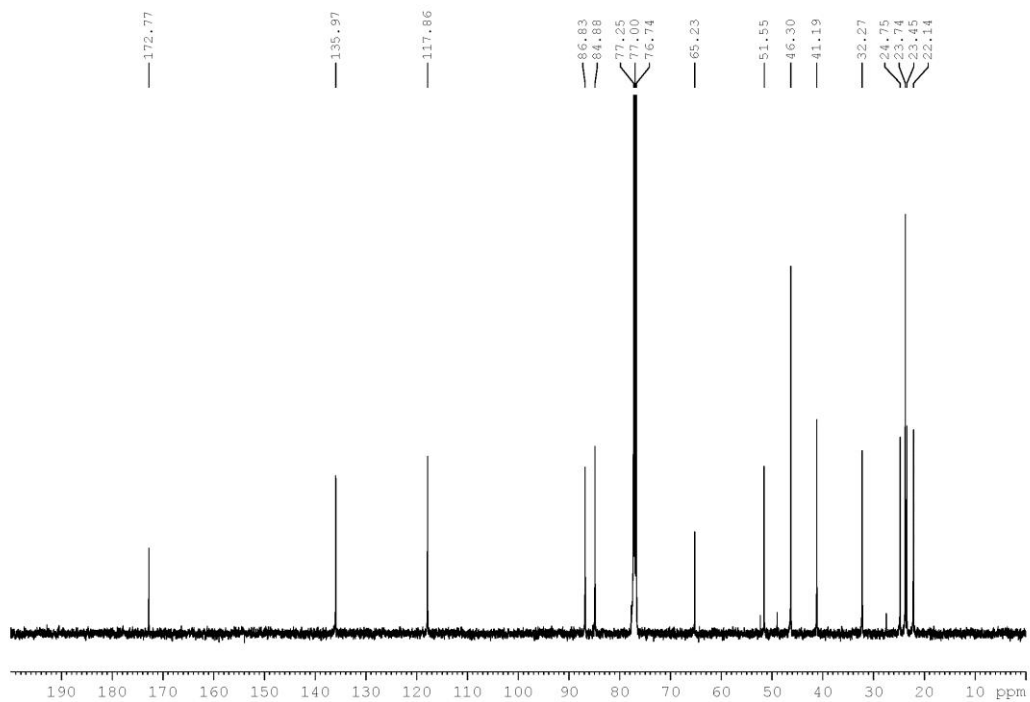

# NOESY Spectrum of 12d in CDCl<sub>3</sub>

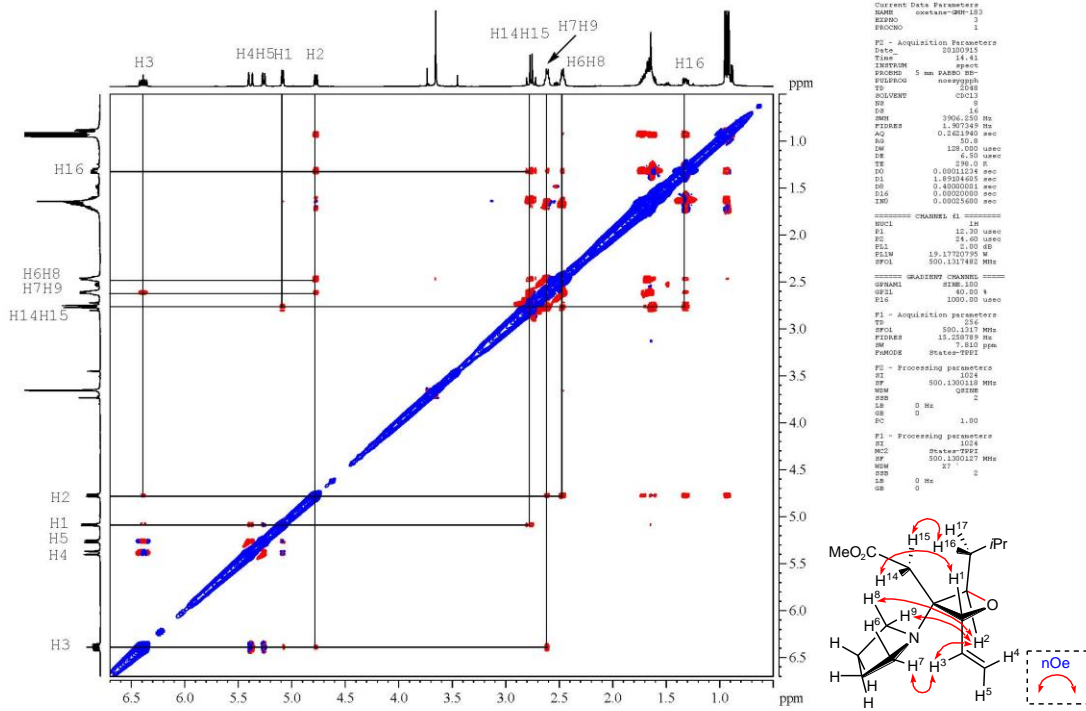

# HSCOC Spectrum of 12d in CDCl<sub>3</sub>

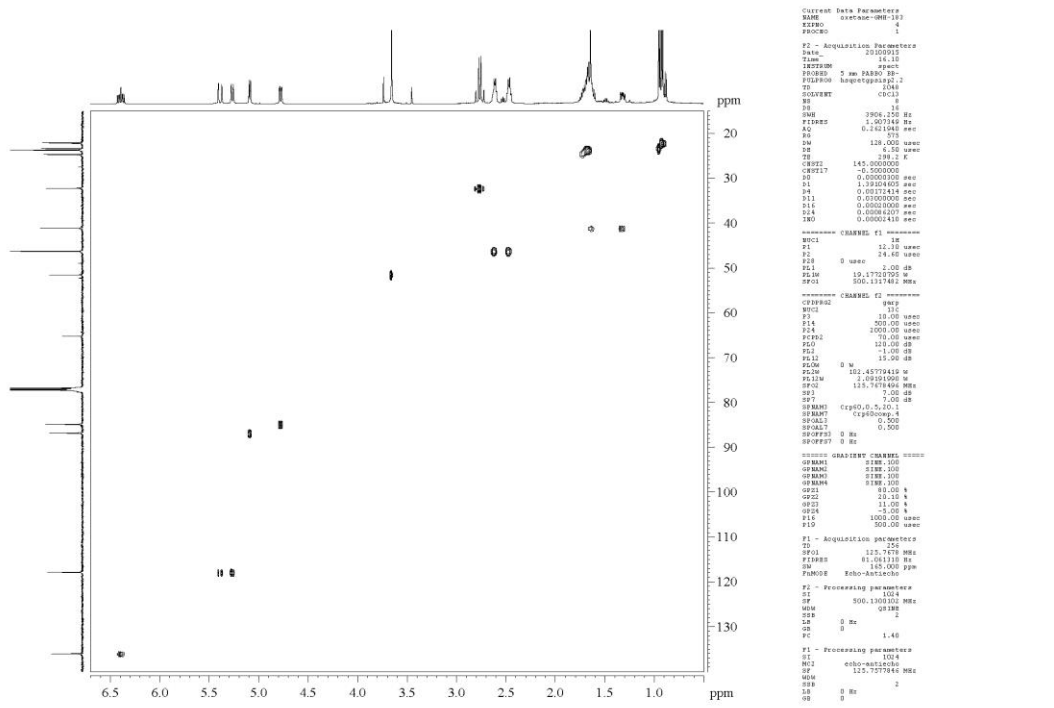

### $^1\text{H}$ NMR Spectrum of **12e** in $\text{CDCl}_3$

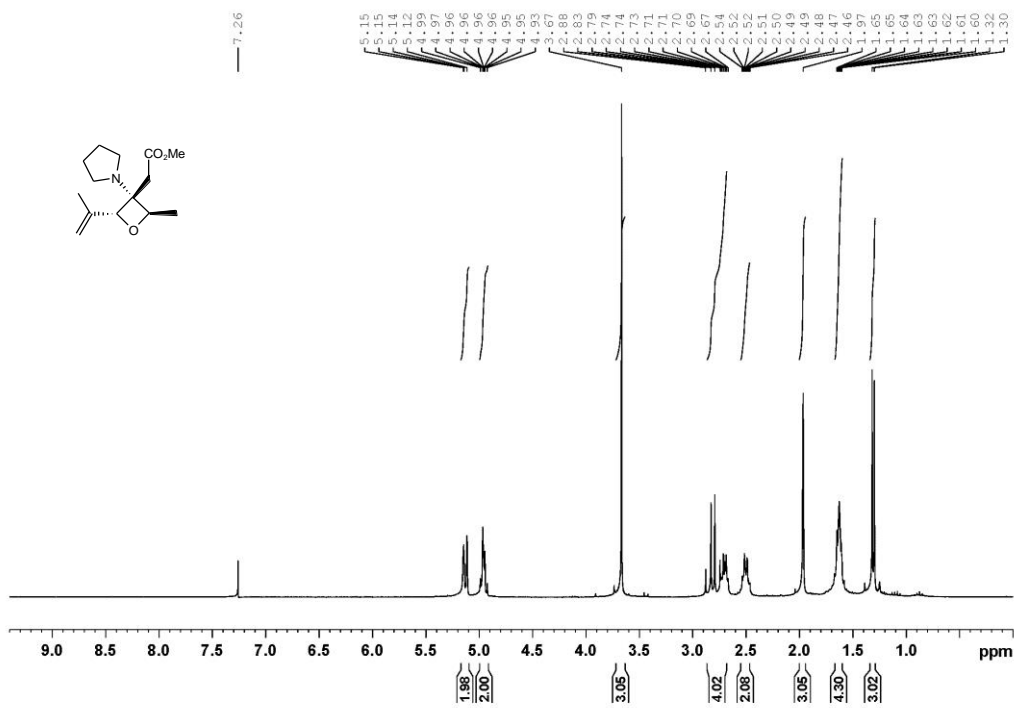

### $^{13}\text{C}$ NMR Spectrum of **12e** in $\text{CDCl}_3$

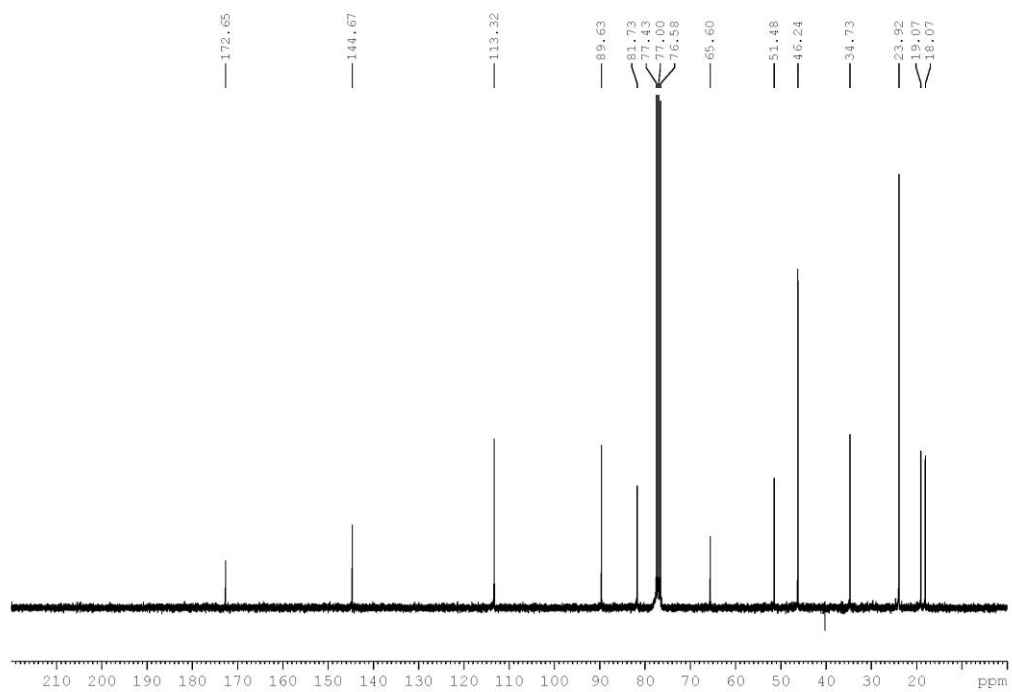

$^1\text{H}$  NMR Spectrum of **12e** in  $\text{C}_6\text{D}_6$

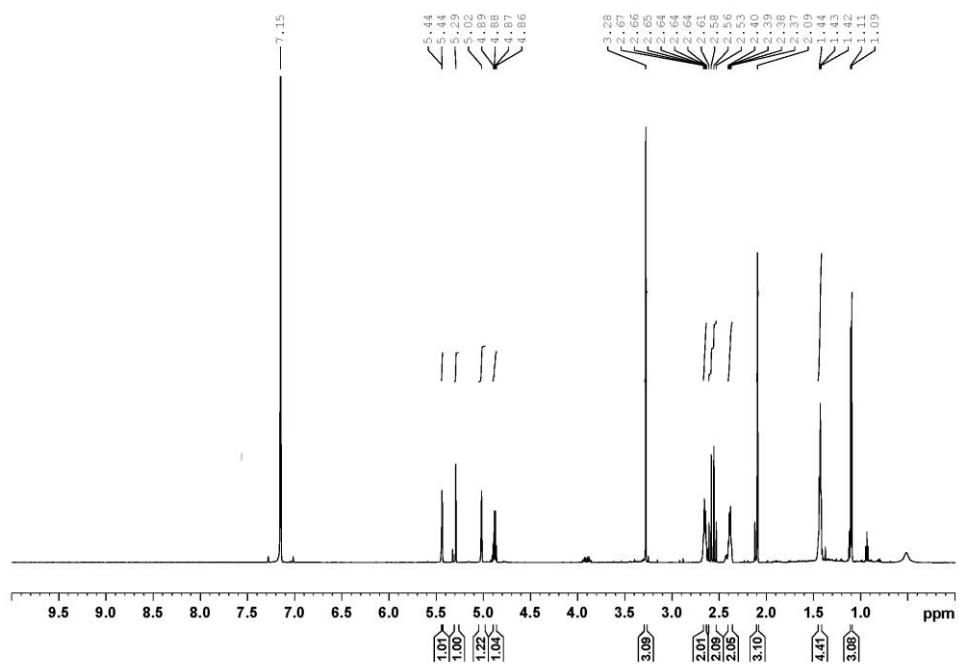

$^{13}\text{C}$  NMR Spectrum of **12e** in  $\text{C}_6\text{D}_6$

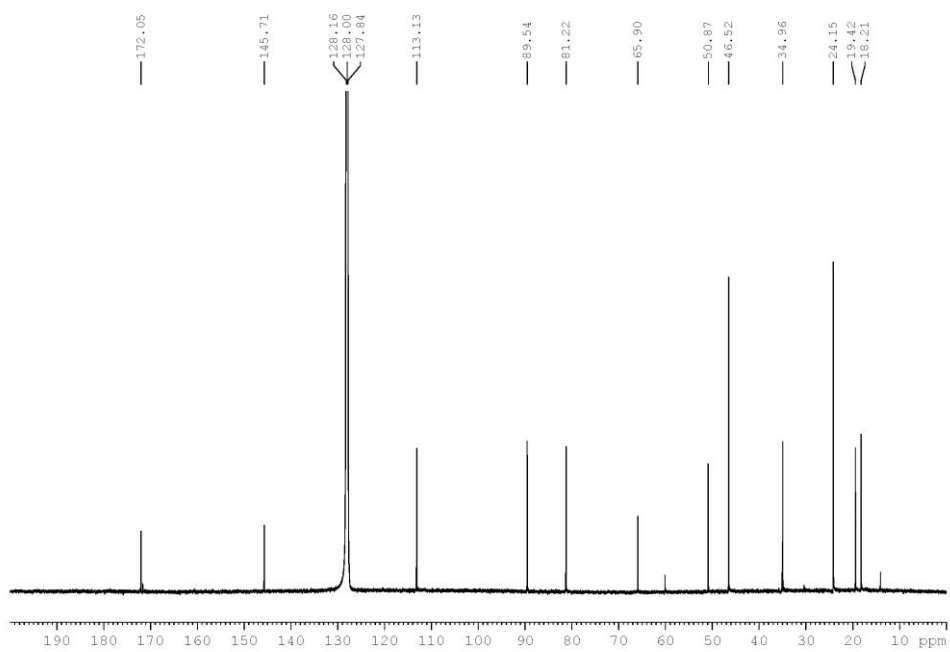

# NOESY Spectrum of 12e in C<sub>6</sub>D<sub>6</sub>

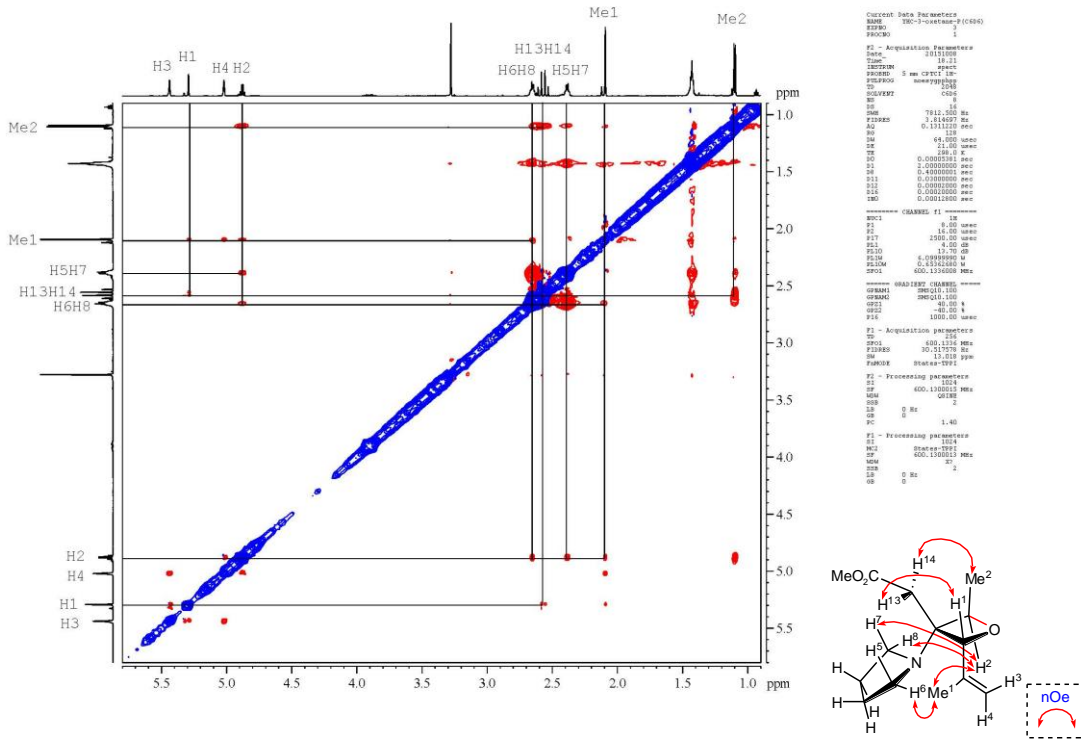

# HSQC Spectrum of 12e in C<sub>6</sub>D<sub>6</sub>

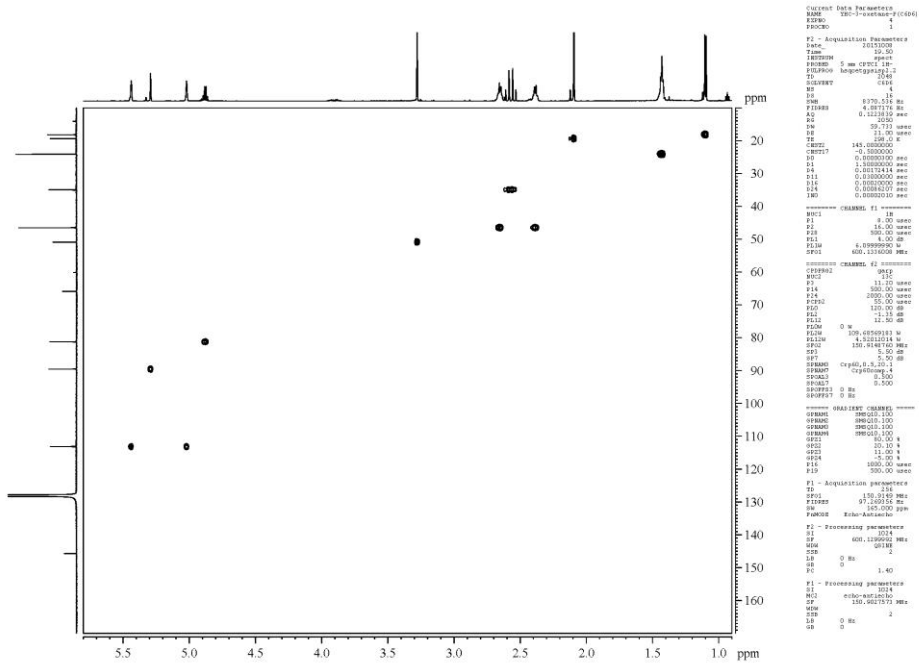







### <sup>1</sup>H NMR Spectrum of **12g** in CDCl<sub>3</sub>

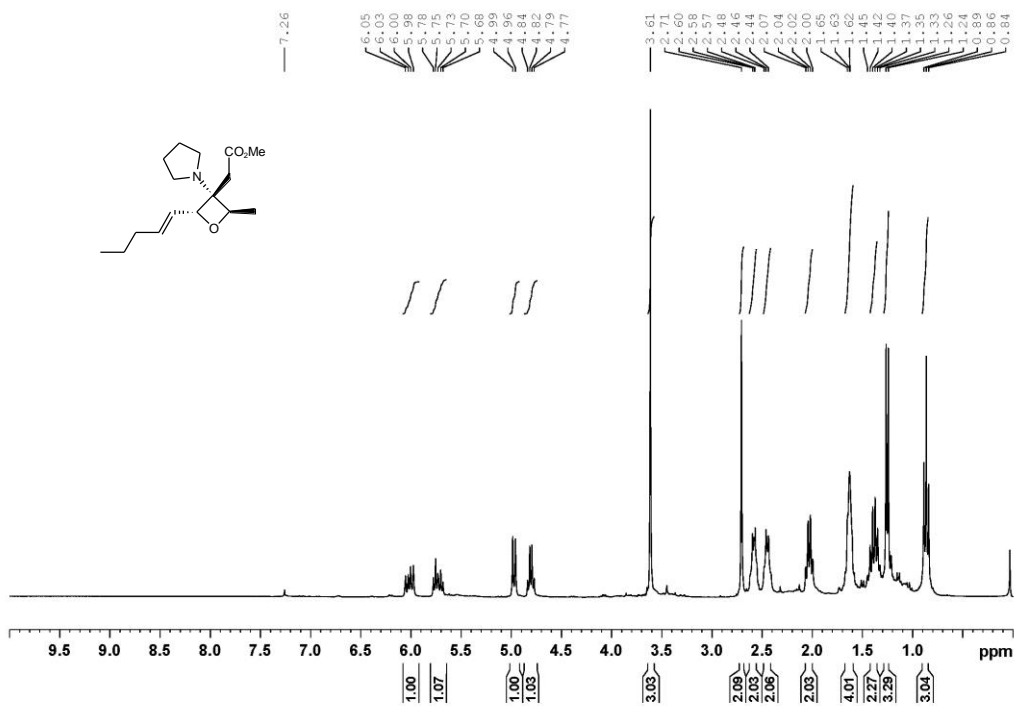

### <sup>13</sup>C NMR Spectrum of **12g** in CDCl<sub>3</sub>

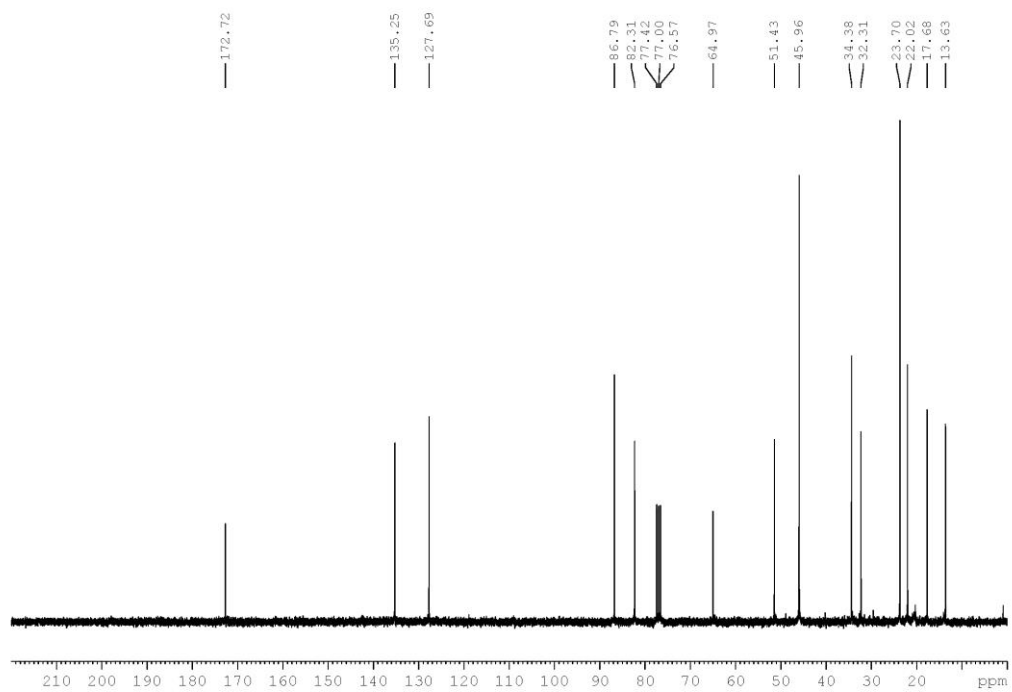

$^1\text{H}$  NMR Spectrum of **12g** in  $\text{C}_6\text{D}_6$

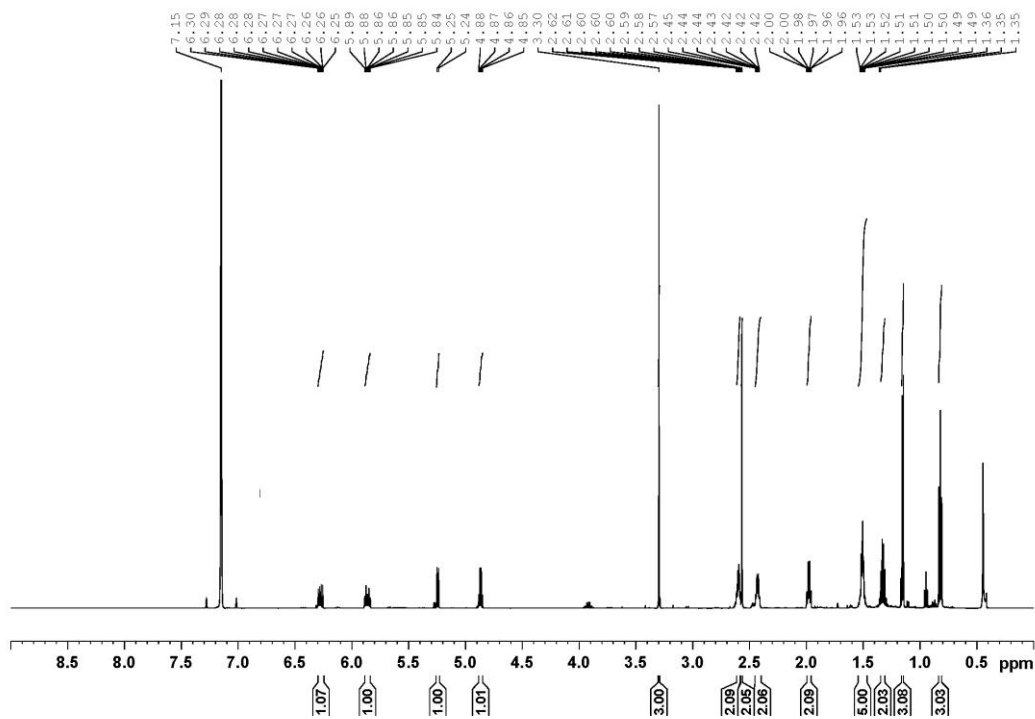

$^{13}\text{C}$  NMR Spectrum of **12g** in  $\text{C}_6\text{D}_6$

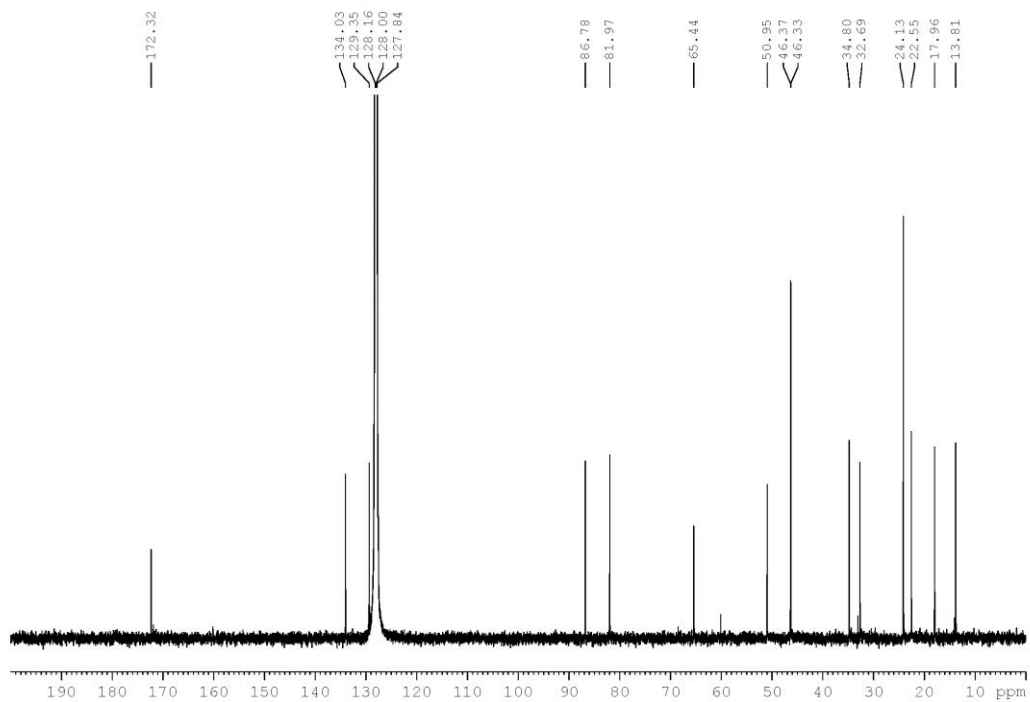

# NOESY Spectrum of 12g in C<sub>6</sub>D<sub>6</sub>

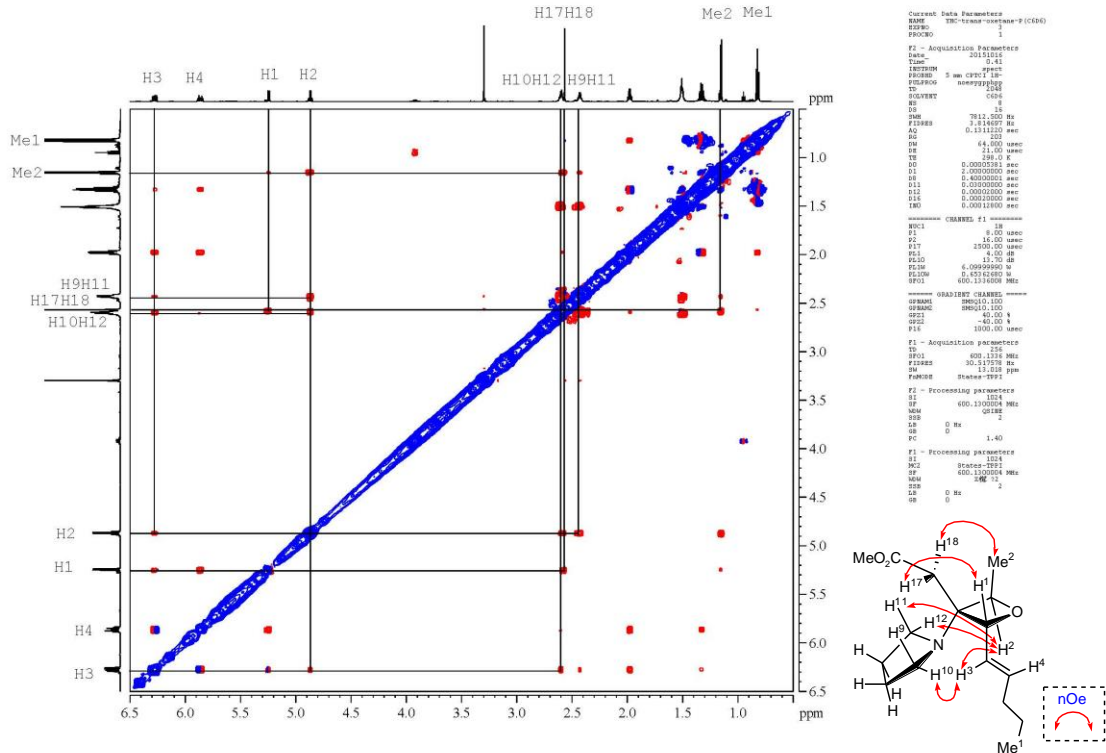

# HSQC Spectrum of 12g in C<sub>6</sub>D<sub>6</sub>

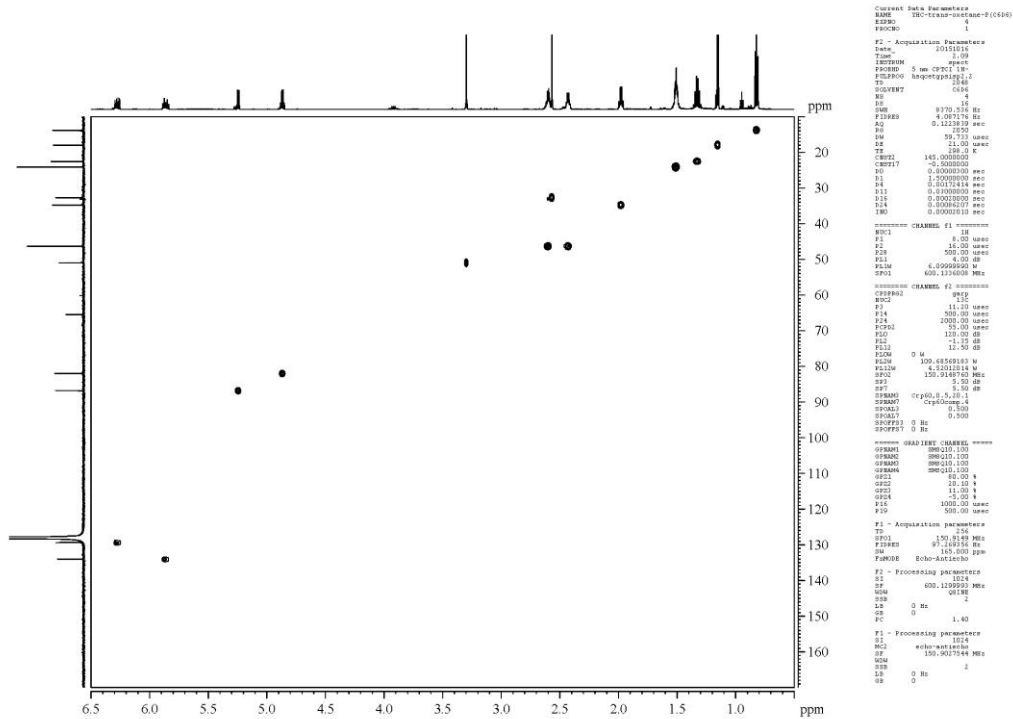

### $^1\text{H}$ NMR Spectrum of **12h** in $\text{CDCl}_3$

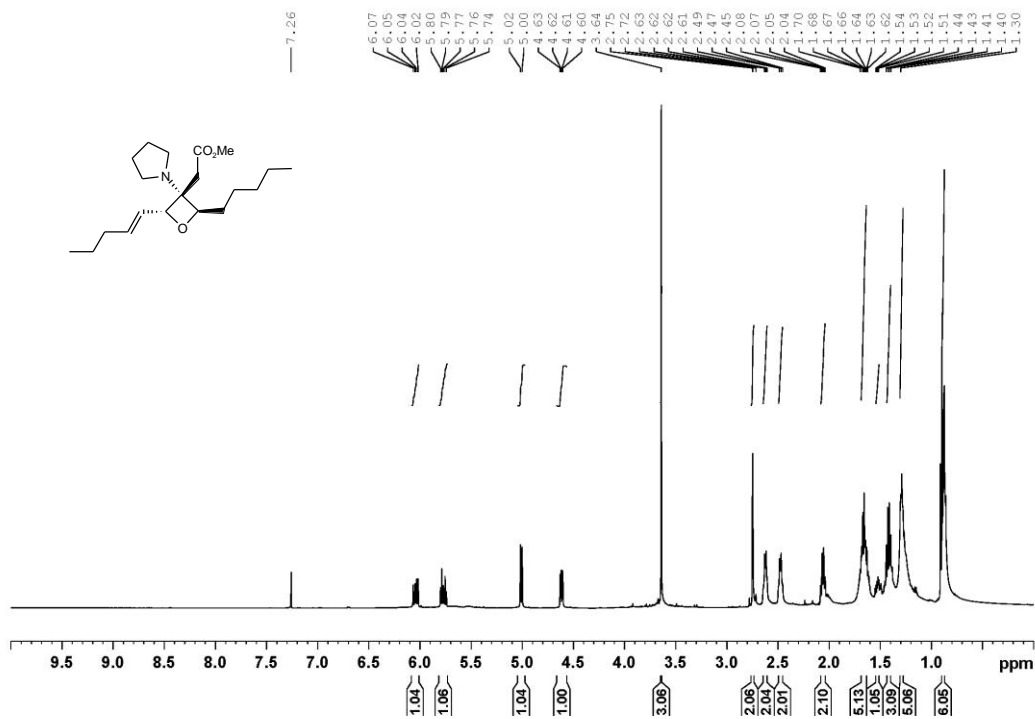

### $^{13}\text{C}$ NMR Spectrum of **12h** in $\text{CDCl}_3$

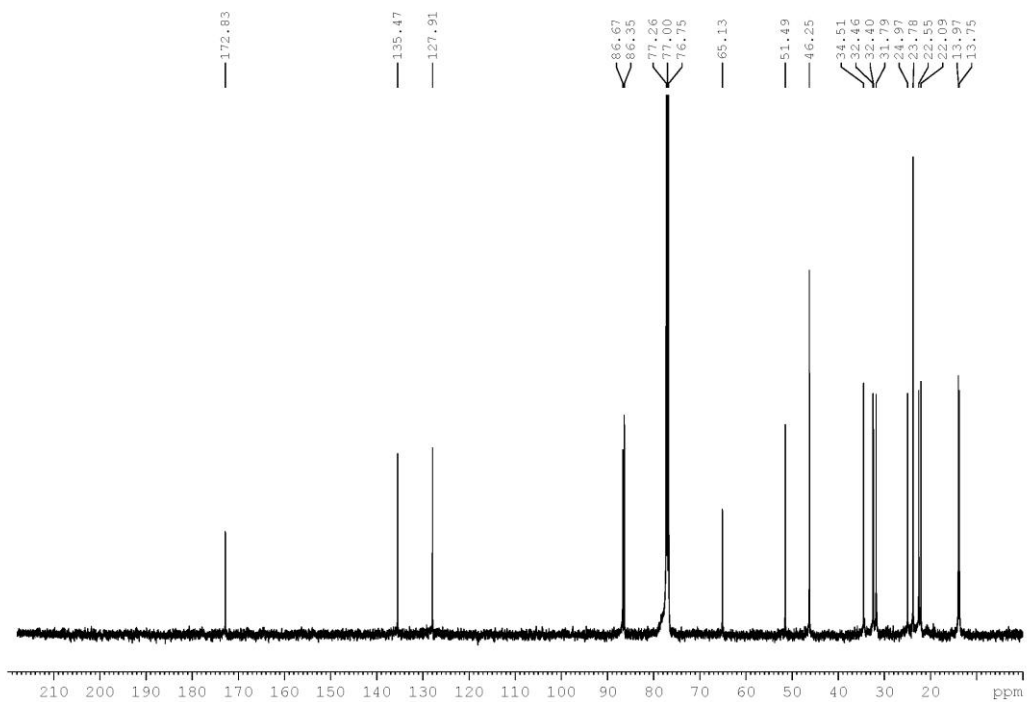

$^1\text{H}$  NMR Spectrum of **12h** in  $\text{C}_6\text{D}_6$

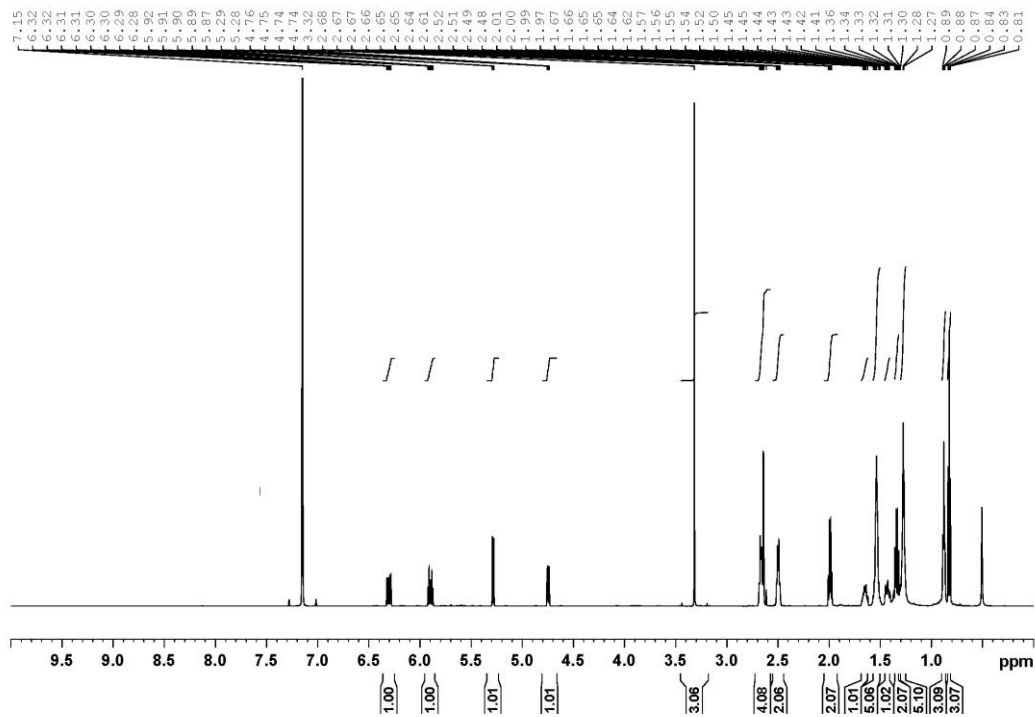

$^{13}\text{C}$  NMR Spectrum of **12h** in  $\text{C}_6\text{D}_6$

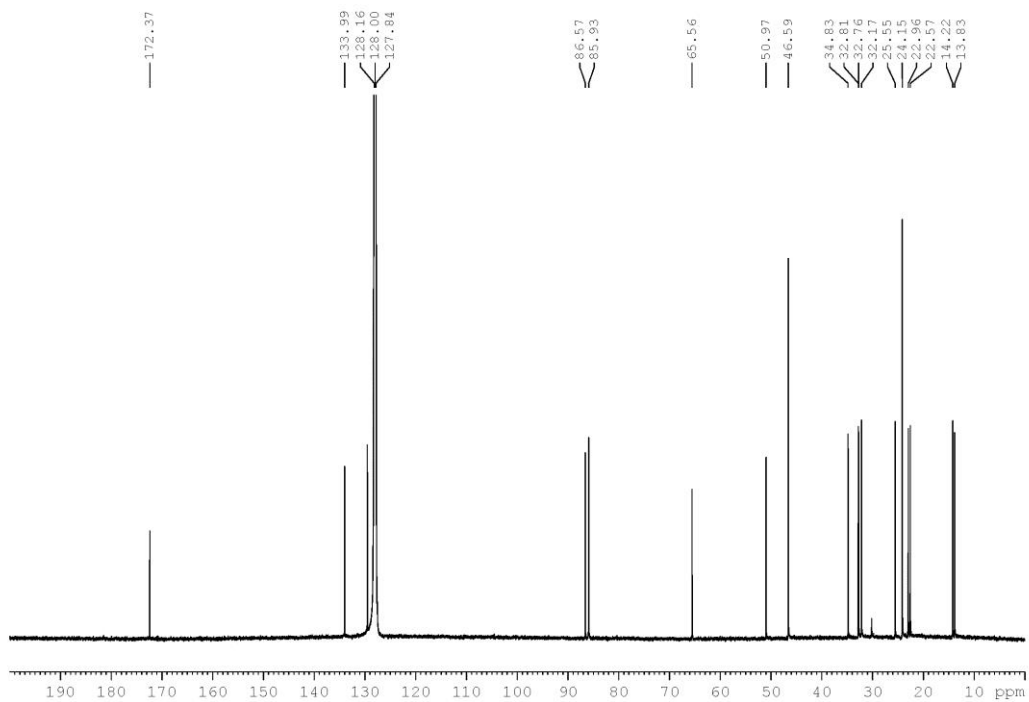

# NOESY Spectrum of 12h in C<sub>6</sub>D<sub>6</sub>

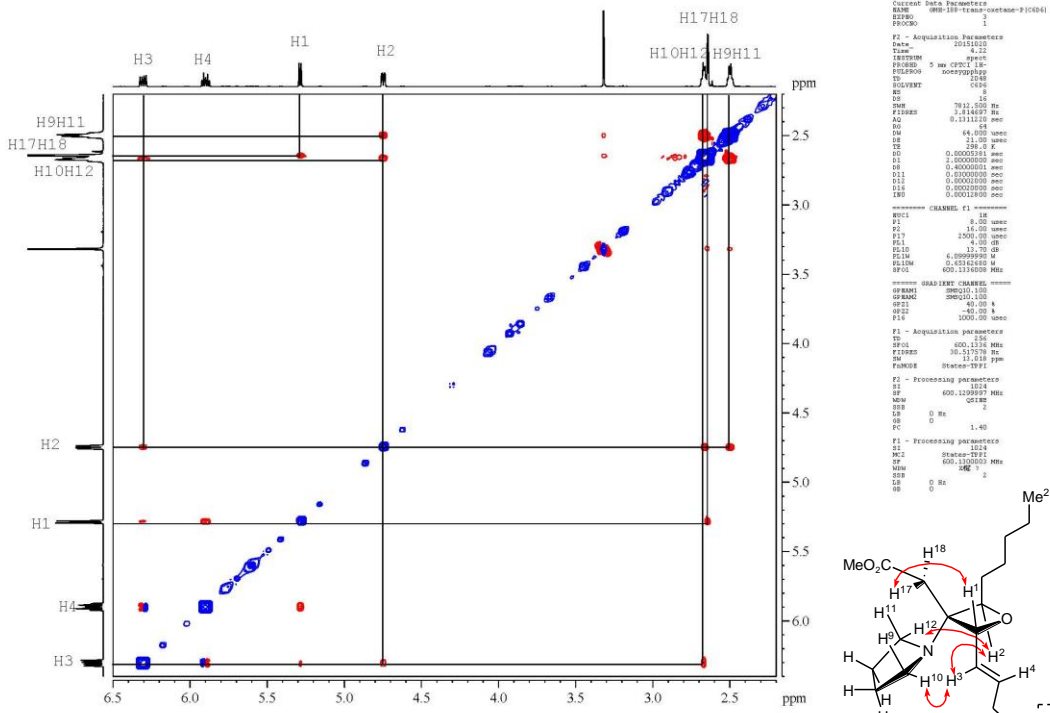

# HSQC Spectrum of 12h in C<sub>6</sub>D<sub>6</sub>

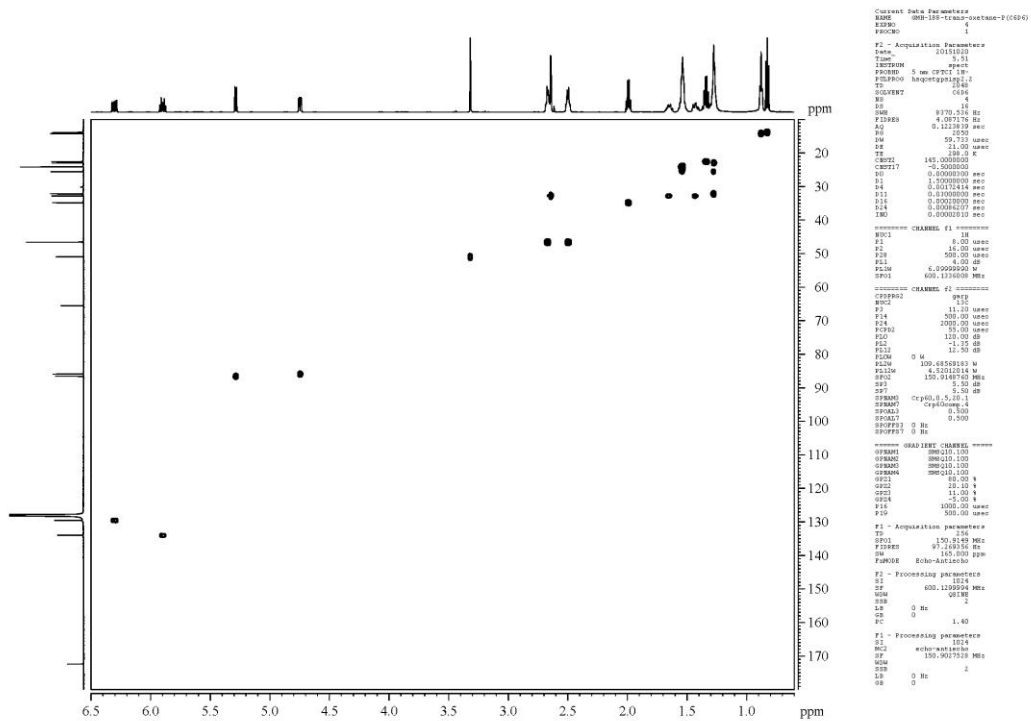

# <sup>1</sup>H NMR Spectrum of **12i** in CDCl<sub>3</sub>

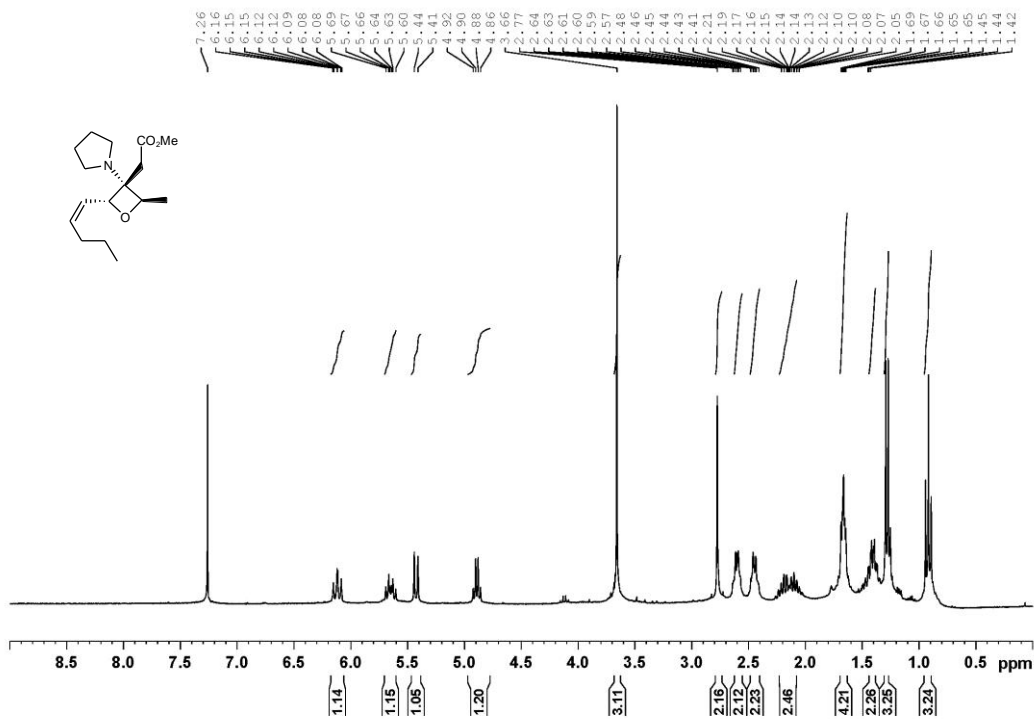

# <sup>13</sup>C NMR Spectrum of **12i** in CDCl<sub>3</sub>

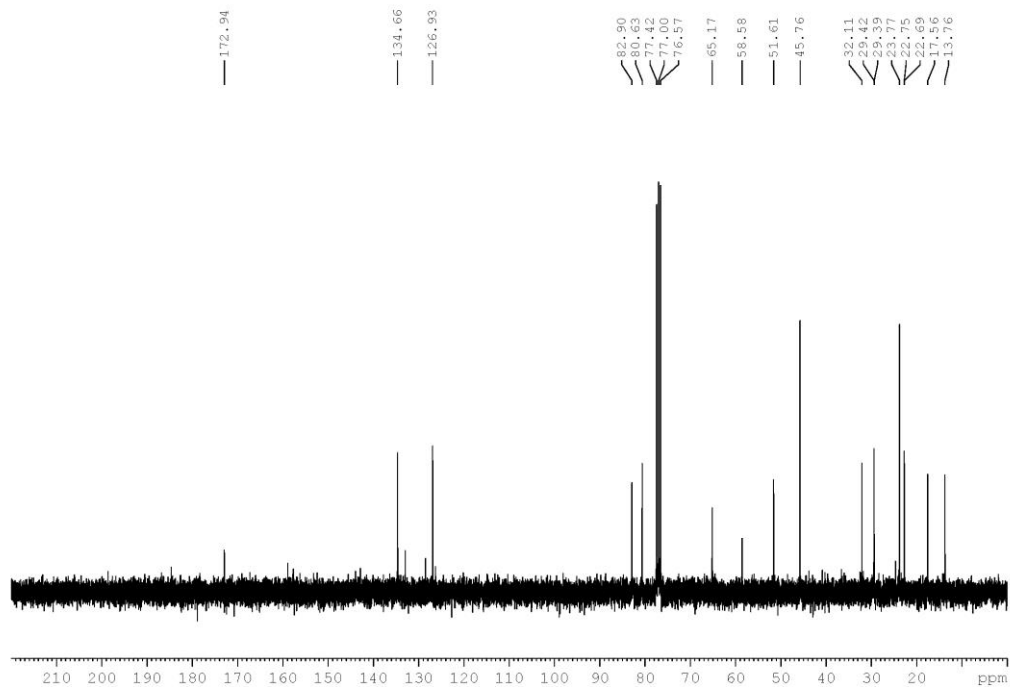

## NOESY Spectrum of **12i** in CDCl<sub>3</sub>

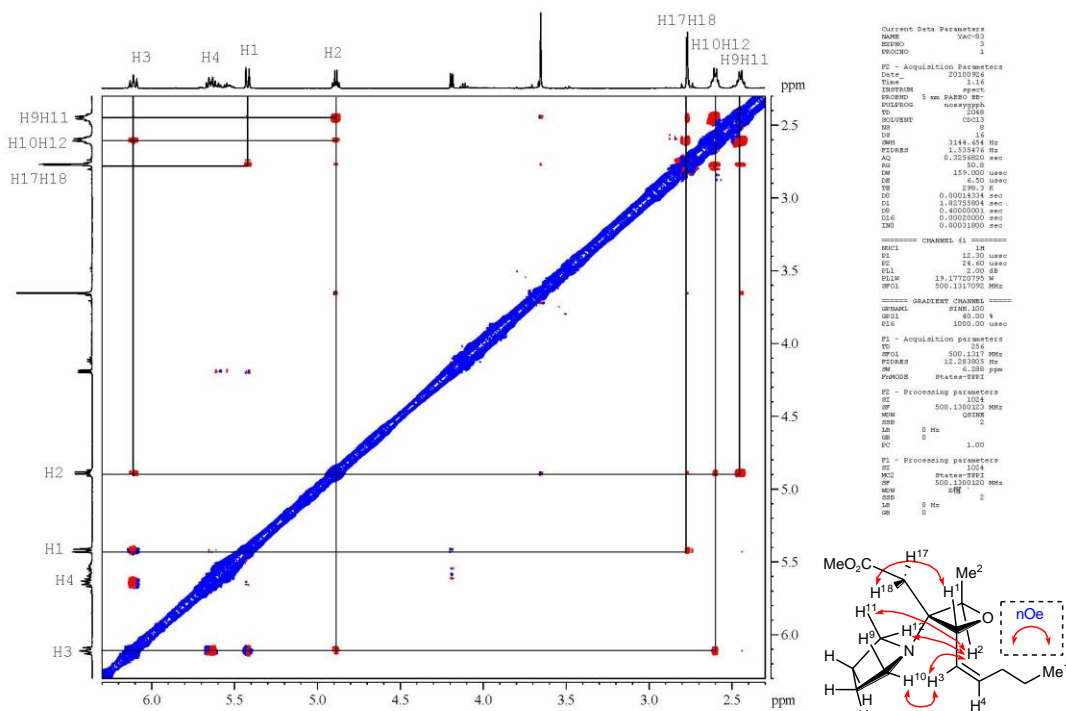

## HSQC Spectrum of **12i** in CDCl<sub>3</sub>

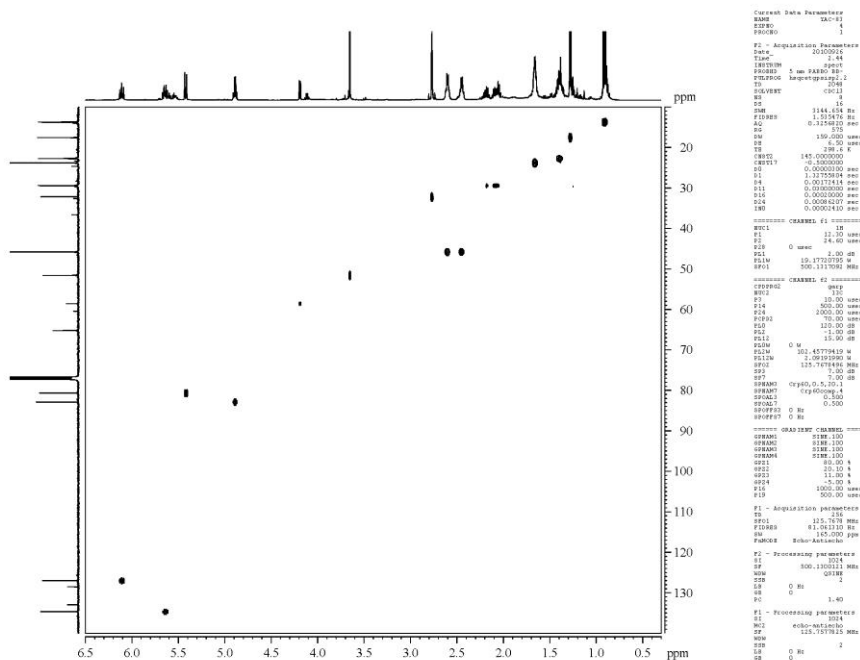



<sup>1</sup>H NMR Spectrum of **12j** in CDCl<sub>3</sub>

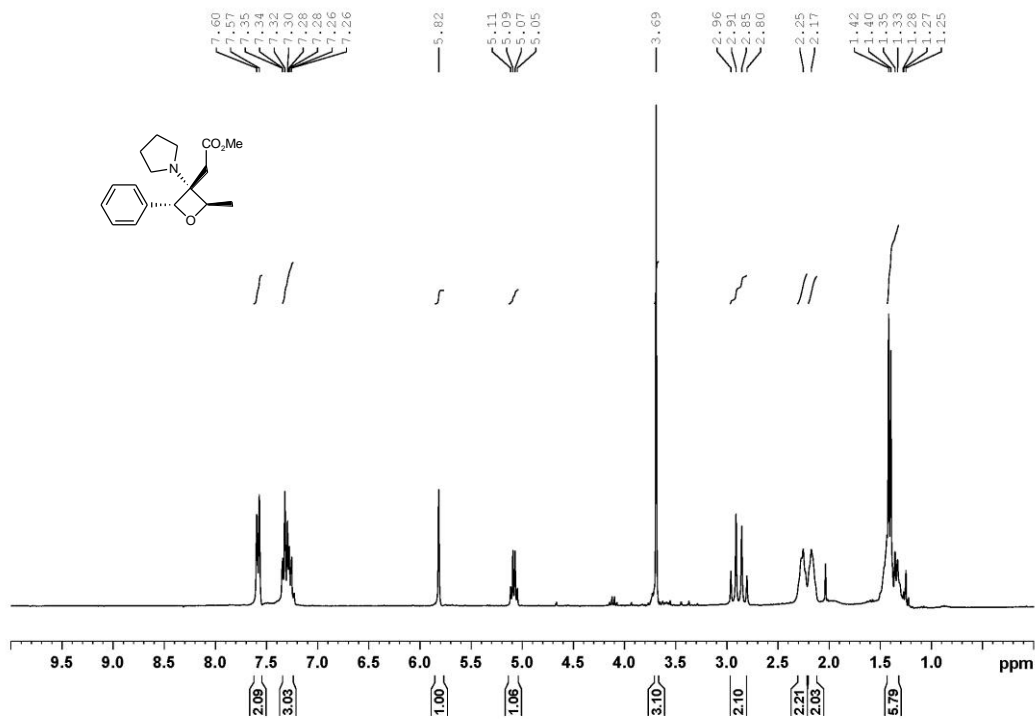

<sup>13</sup>C NMR Spectrum of **12j** in CDCl<sub>3</sub>

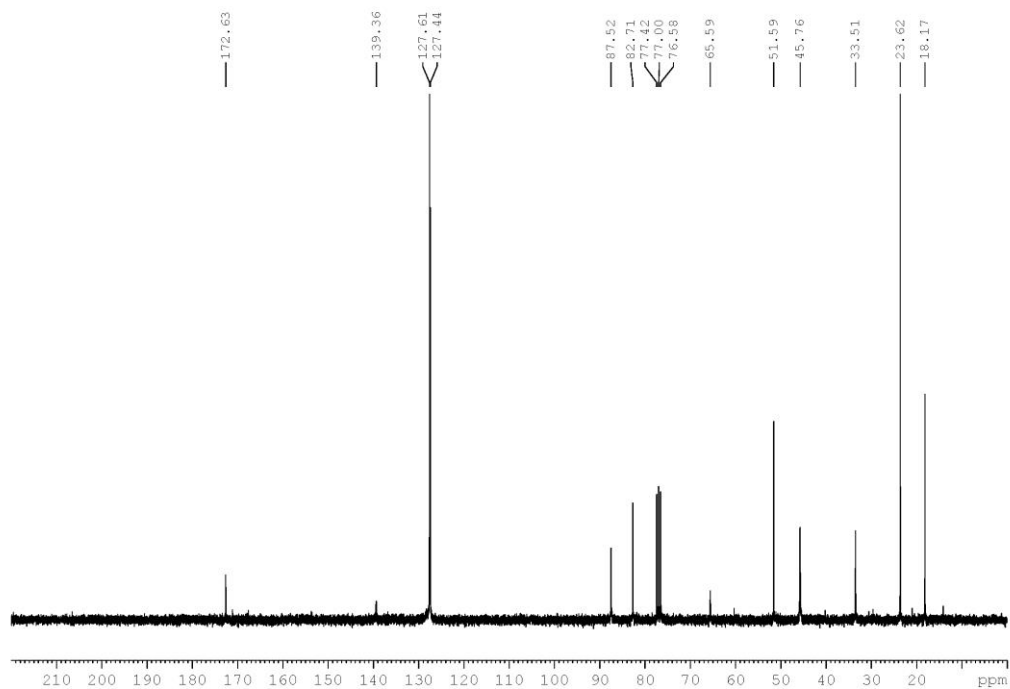

### $^1\text{H}$ NMR Spectrum of **12k** in $\text{CDCl}_3$

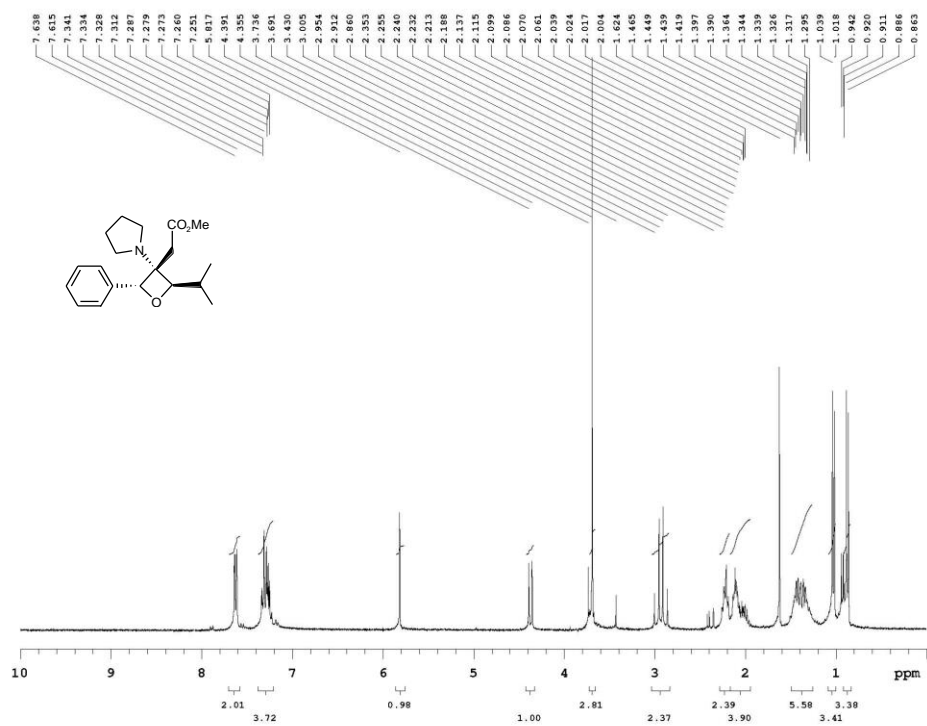

### $^{13}\text{C}$ NMR Spectrum of **12k** in $\text{CDCl}_3$

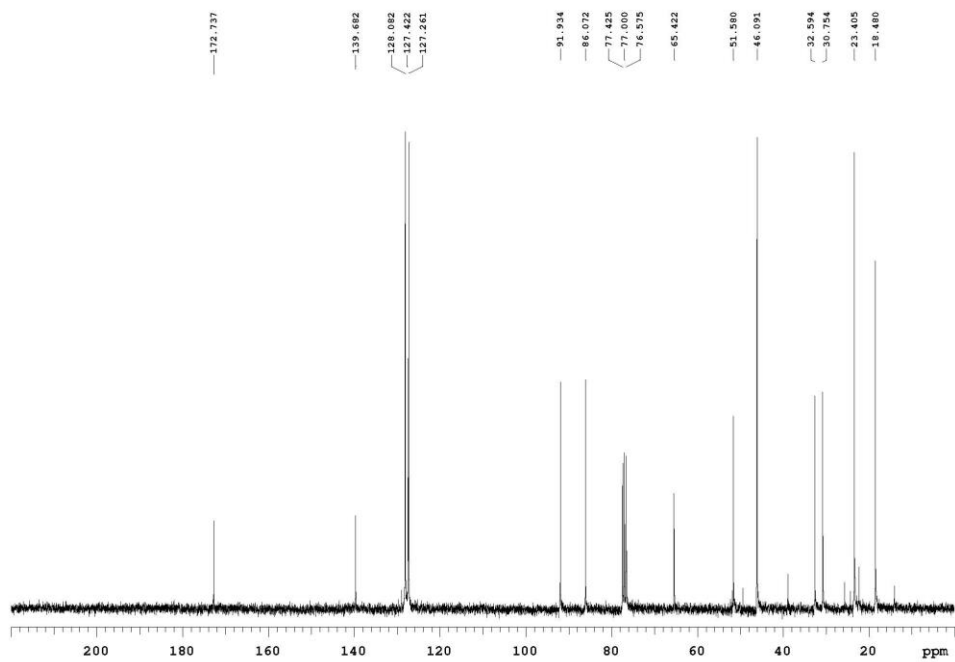

$^1\text{H}$  NMR Spectrum of **12k** in  $\text{C}_6\text{D}_6$

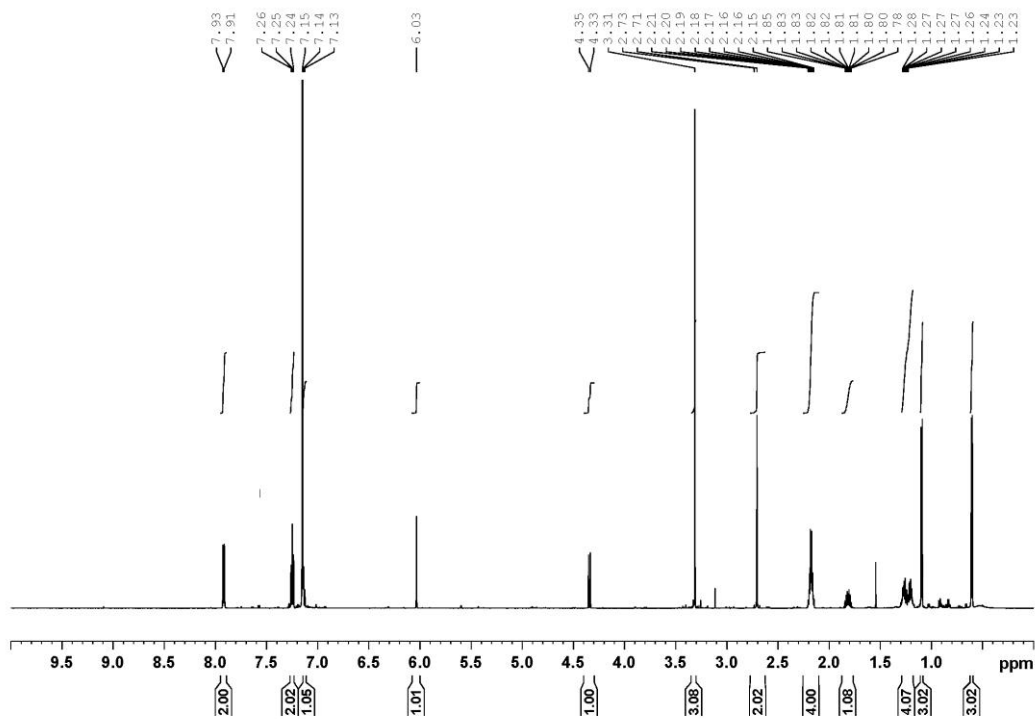

$^{13}\text{C}$  NMR Spectrum of **12k** in  $\text{C}_6\text{D}_6$

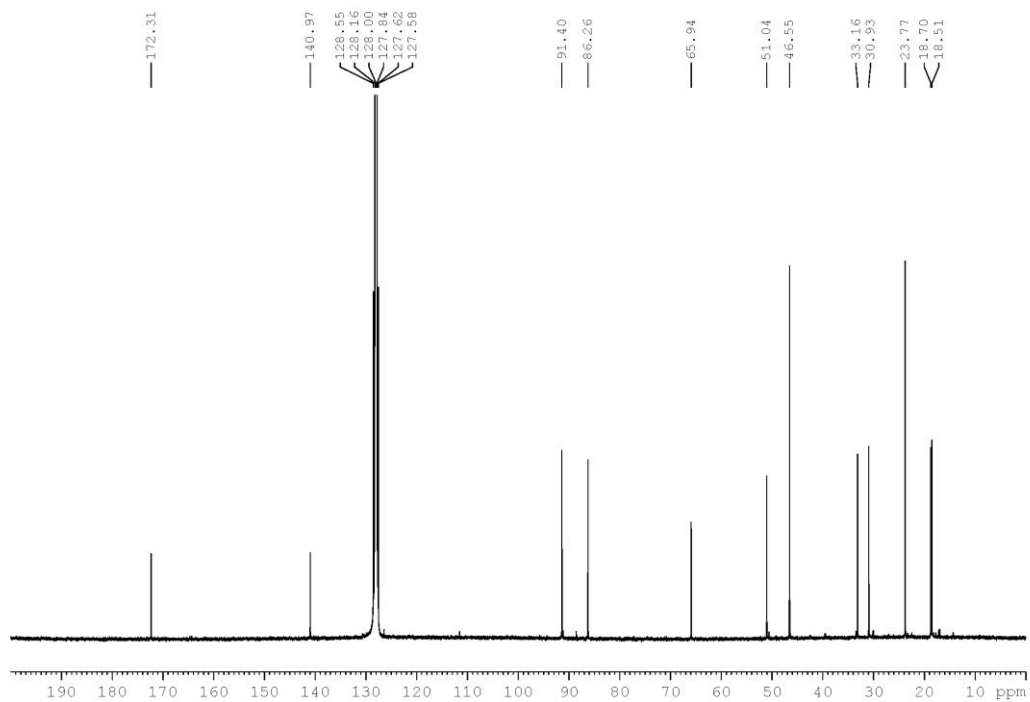



### <sup>1</sup>H NMR Spectrum of **12l** in CDCl<sub>3</sub>

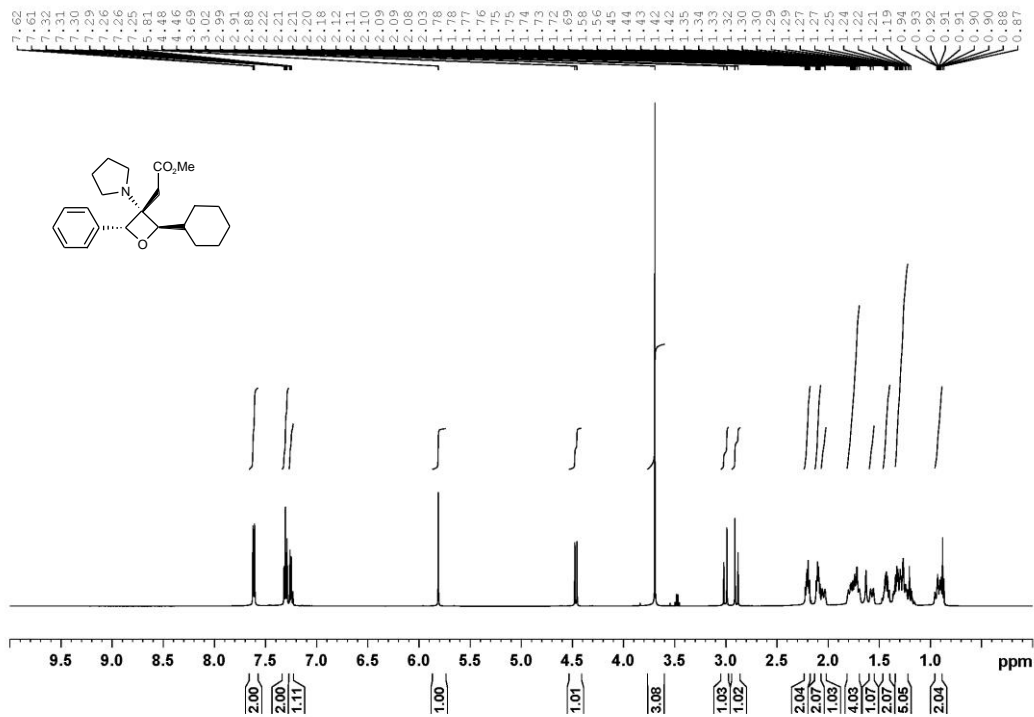

### <sup>13</sup>C NMR Spectrum of **12l** in CDCl<sub>3</sub>

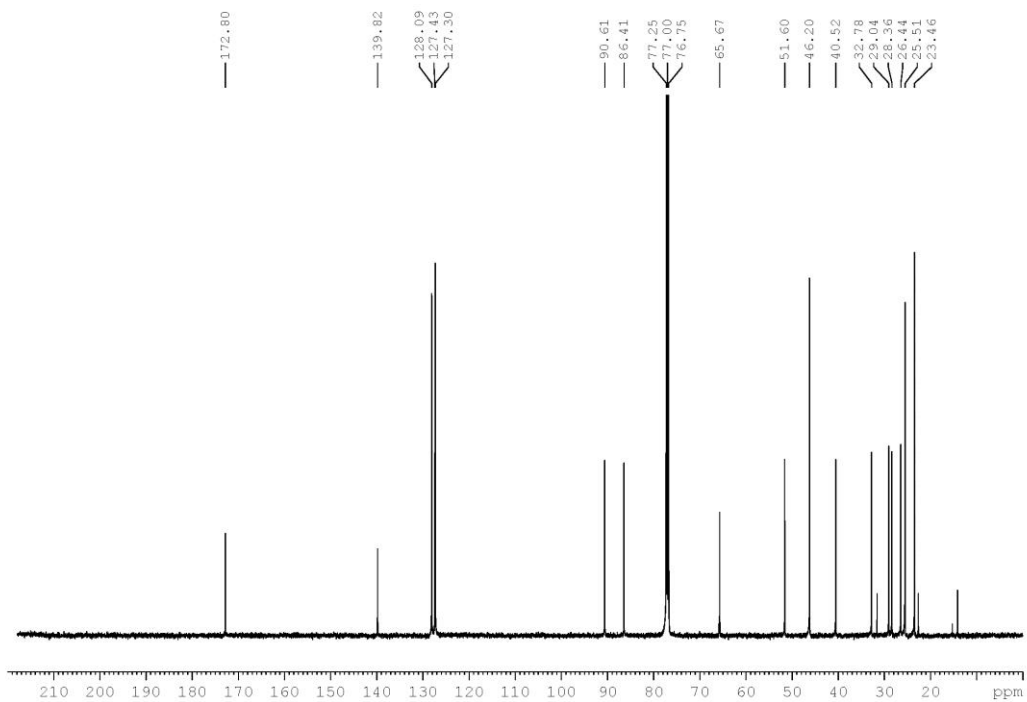

# NOESY Spectrum of **12l** in CDCl<sub>3</sub>

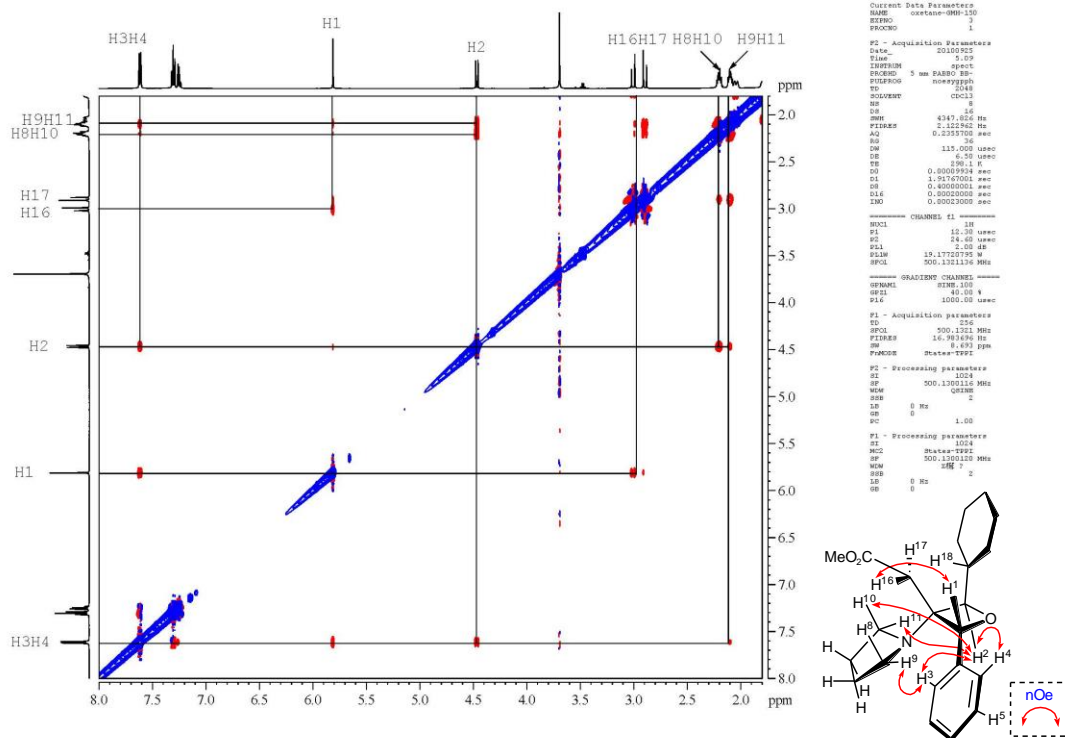

# HSQC Spectrum of **12l** in CDCl<sub>3</sub>

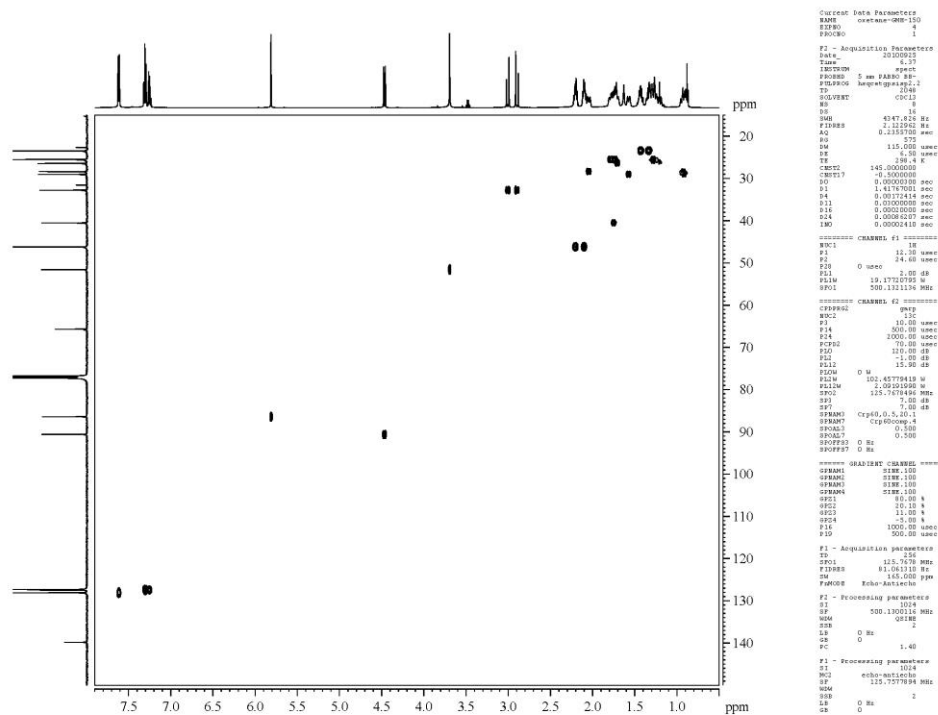

### <sup>1</sup>H NMR Spectrum of **12m** in CDCl<sub>3</sub>

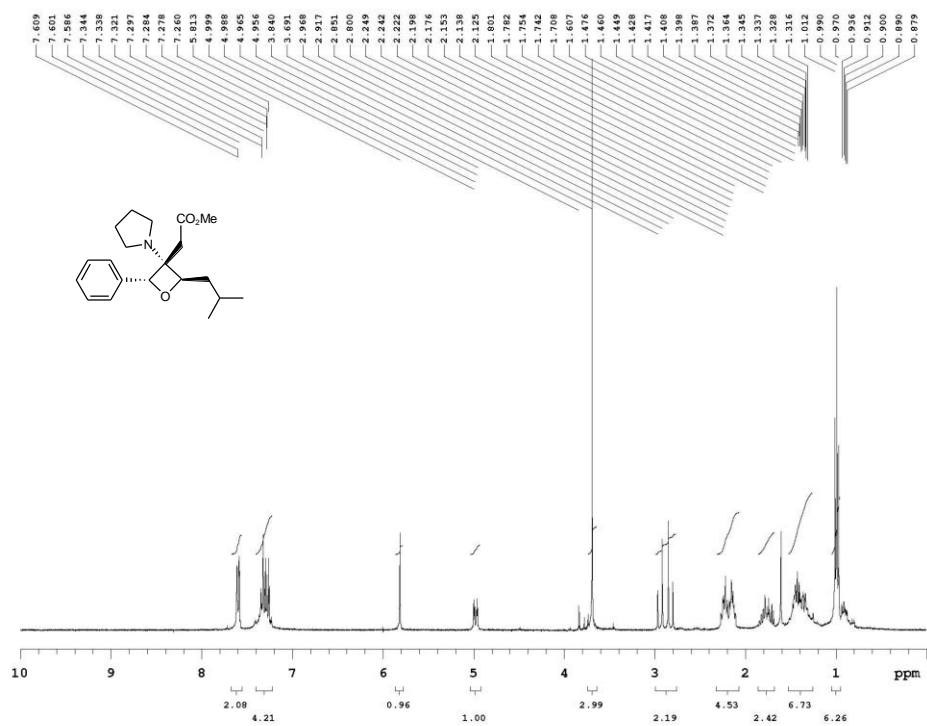

### <sup>13</sup>C NMR Spectrum of **12m** in CDCl<sub>3</sub>

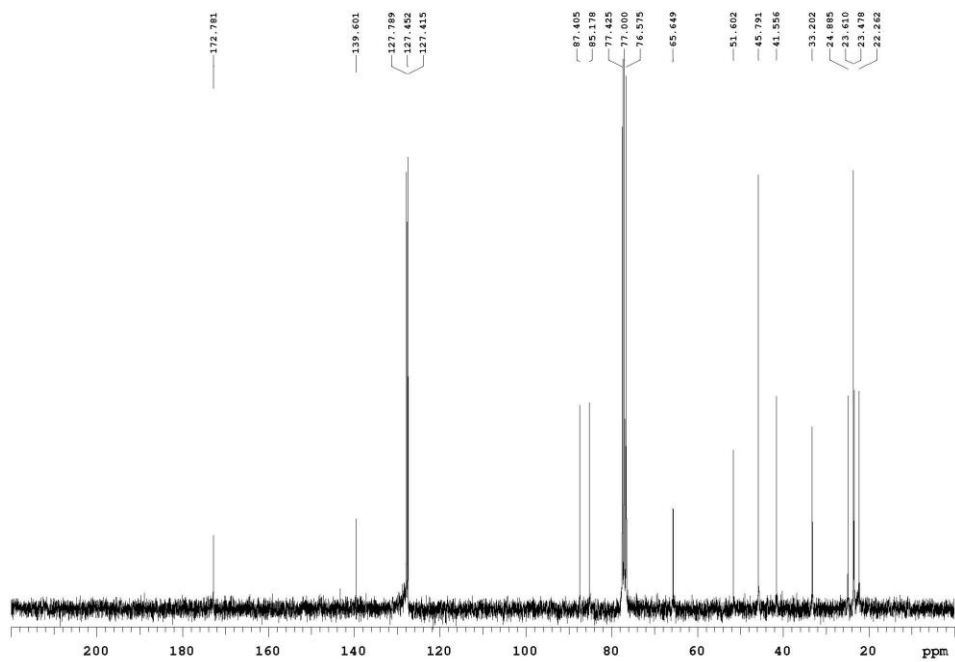

# NOESY Spectrum of 12m in CDCl<sub>3</sub>

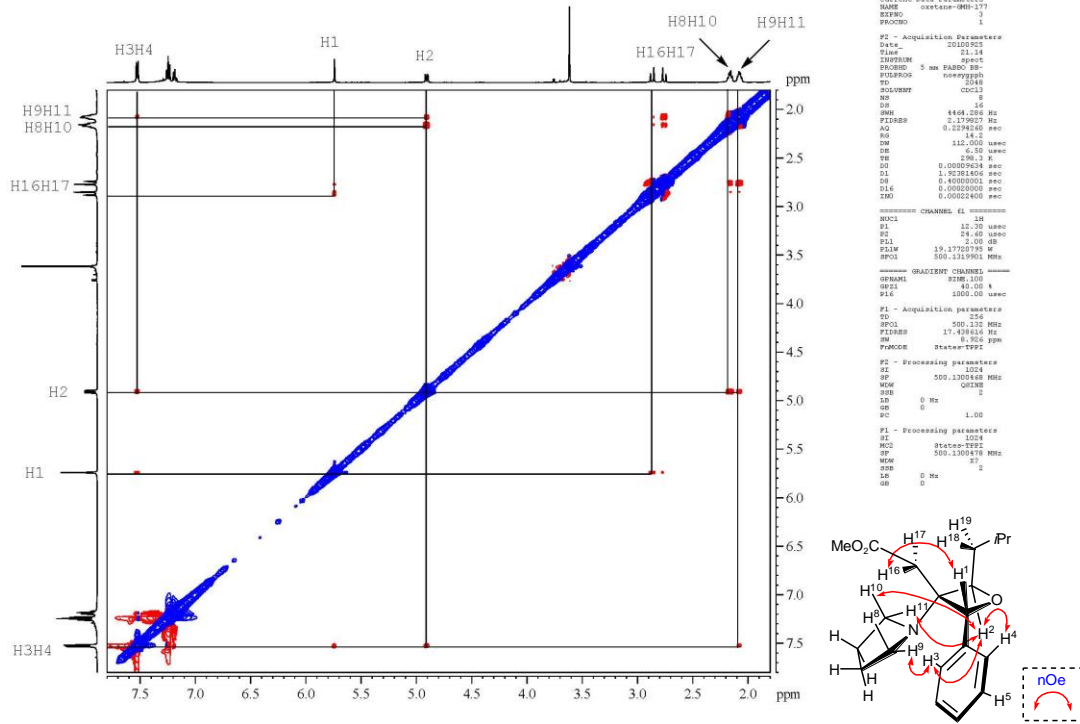

# HSQC Spectrum of 12m in CDCl<sub>3</sub>

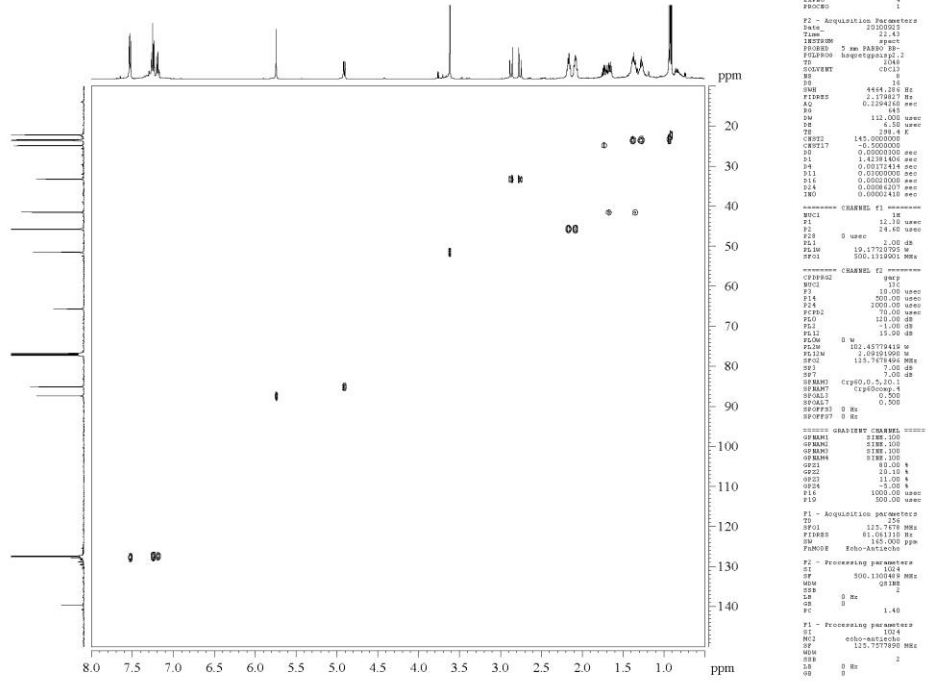



### <sup>1</sup>H NMR Spectrum of **12n** in CDCl<sub>3</sub>

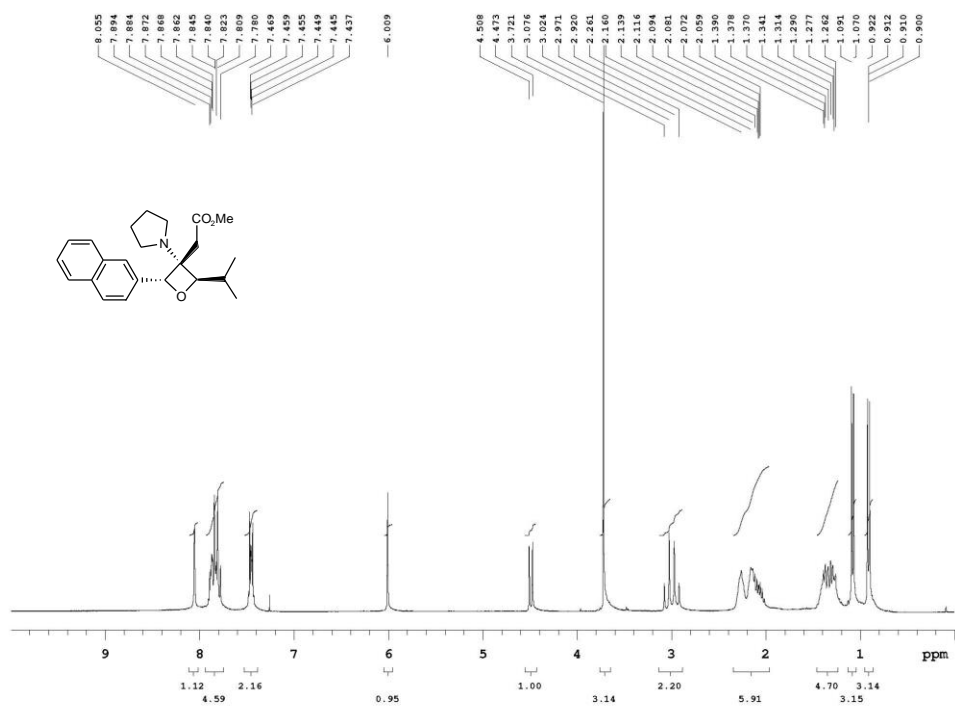

### <sup>13</sup>C NMR Spectrum of **12n** in CDCl<sub>3</sub>

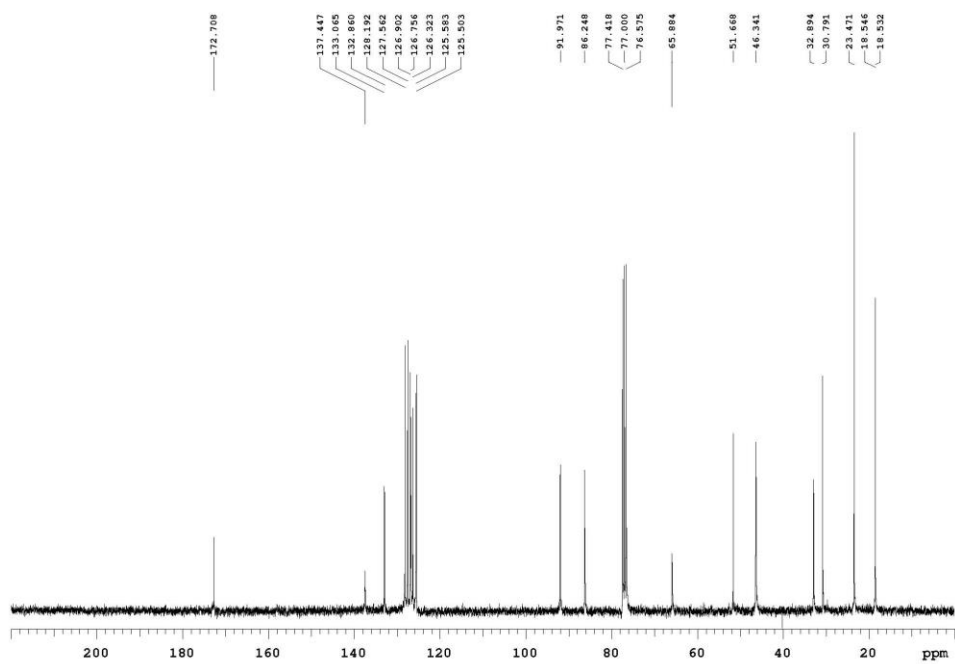

$^1\text{H}$  NMR Spectrum of **12n** in  $\text{C}_6\text{D}_6$

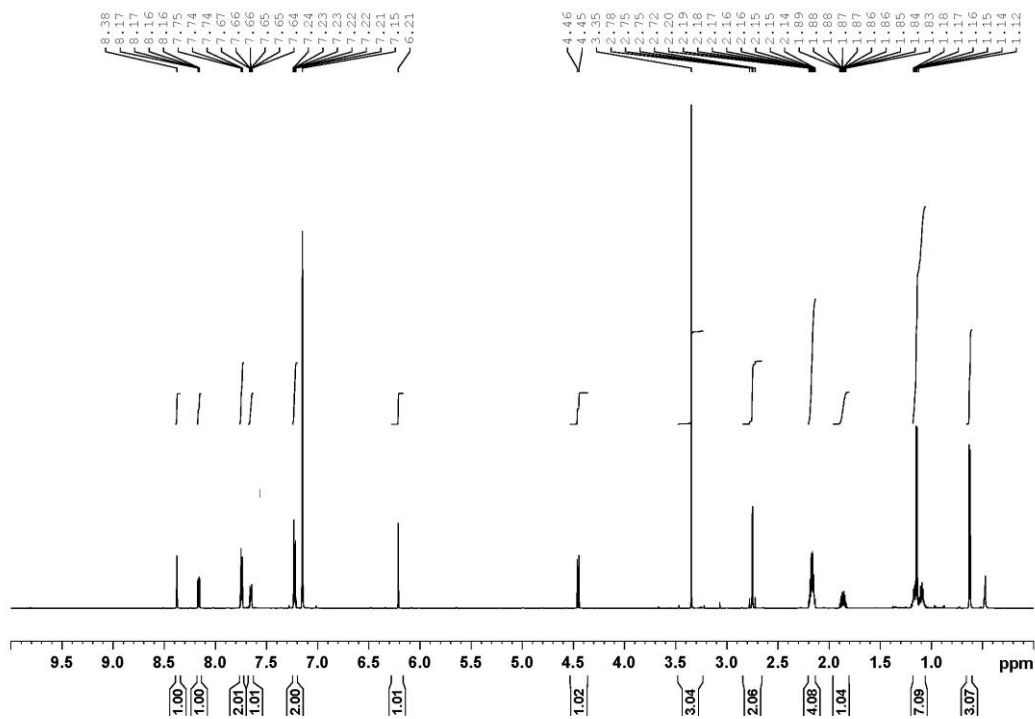

$^{13}\text{C}$  NMR Spectrum of **12n** in  $\text{C}_6\text{D}_6$

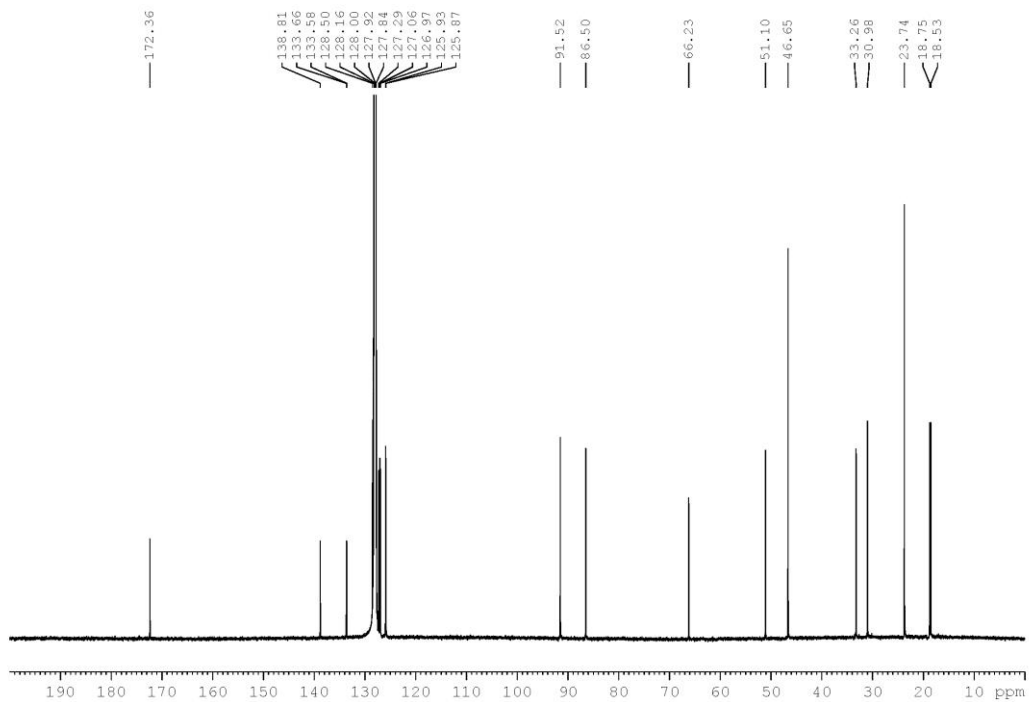



### $^1\text{H}$ NMR Spectrum of **Z-13a** in $\text{CDCl}_3$

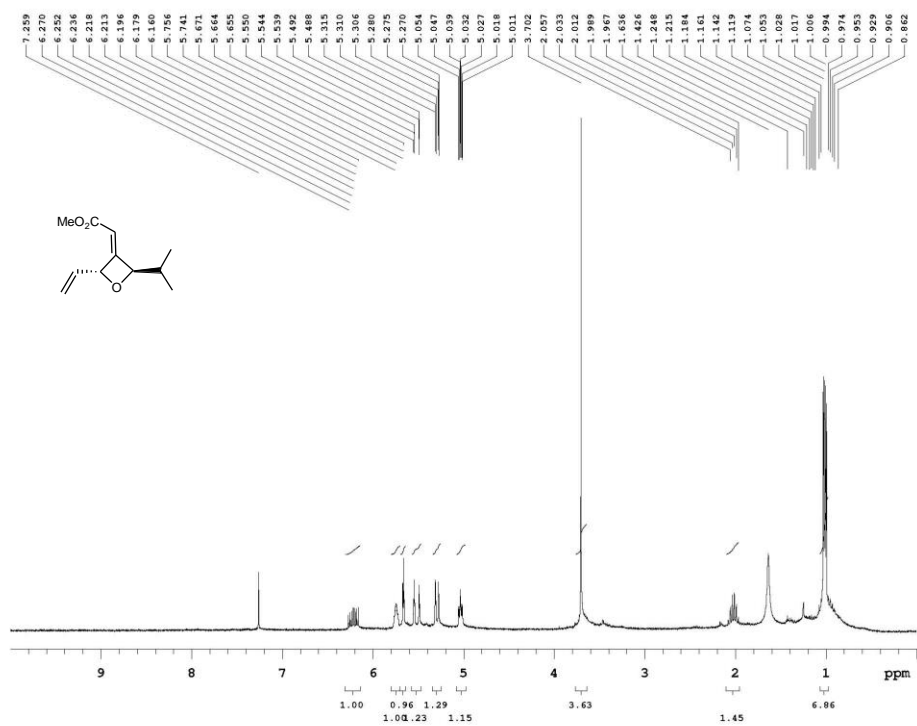

### $^{13}\text{C}$ NMR Spectrum of **Z-13a** in $\text{CDCl}_3$

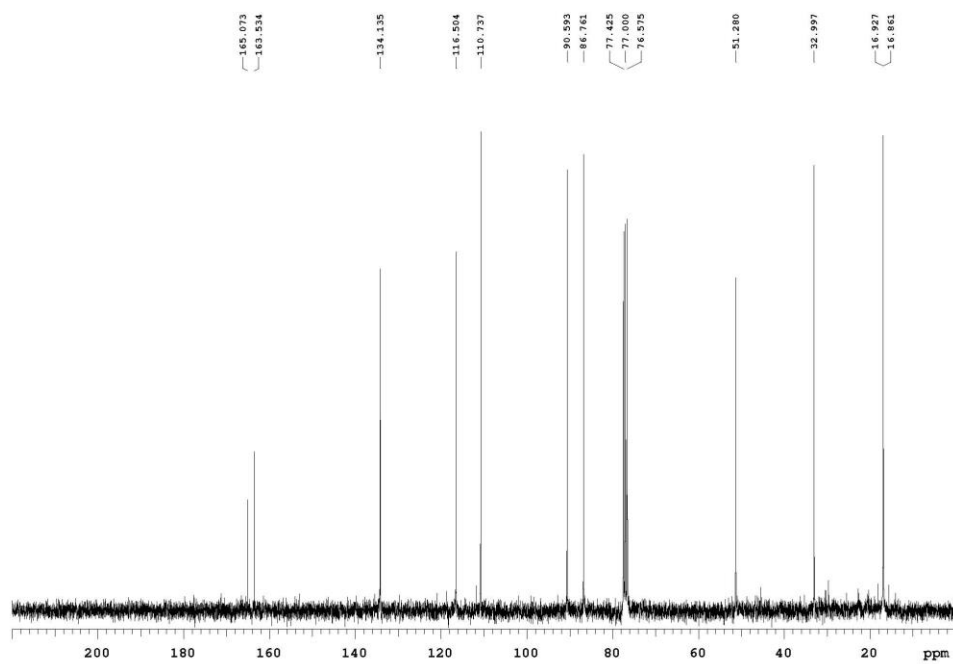

### $^1\text{H}$ NMR Spectrum of **Z-13a** in $\text{C}_6\text{D}_6$

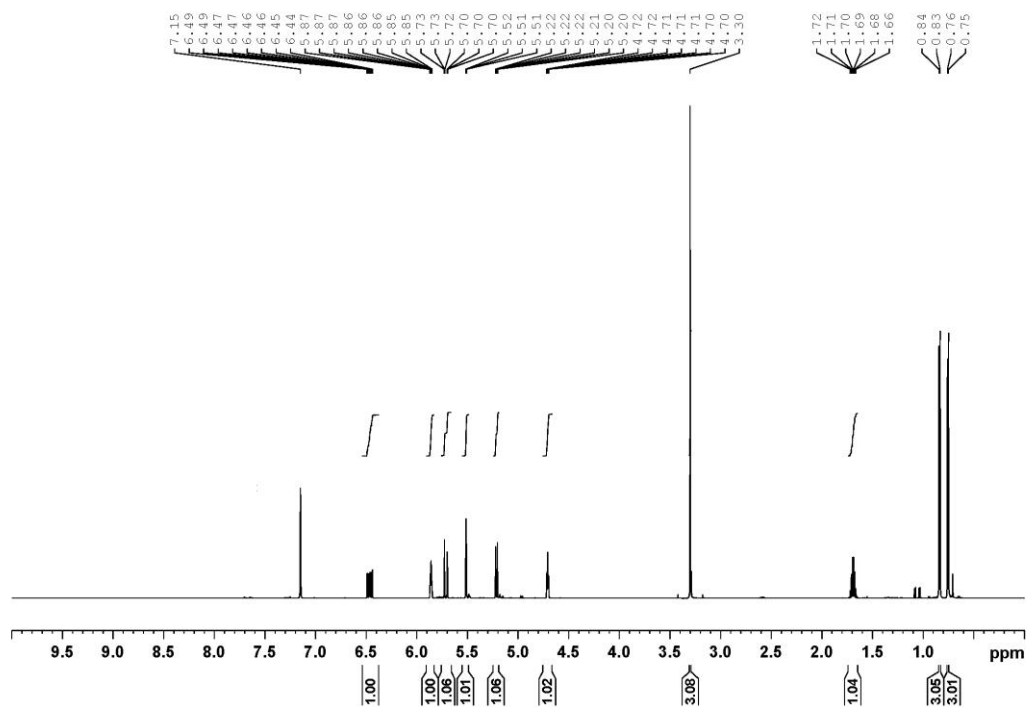

### $^{13}\text{C}$ NMR Spectrum of **Z-13a** in $\text{C}_6\text{D}_6$

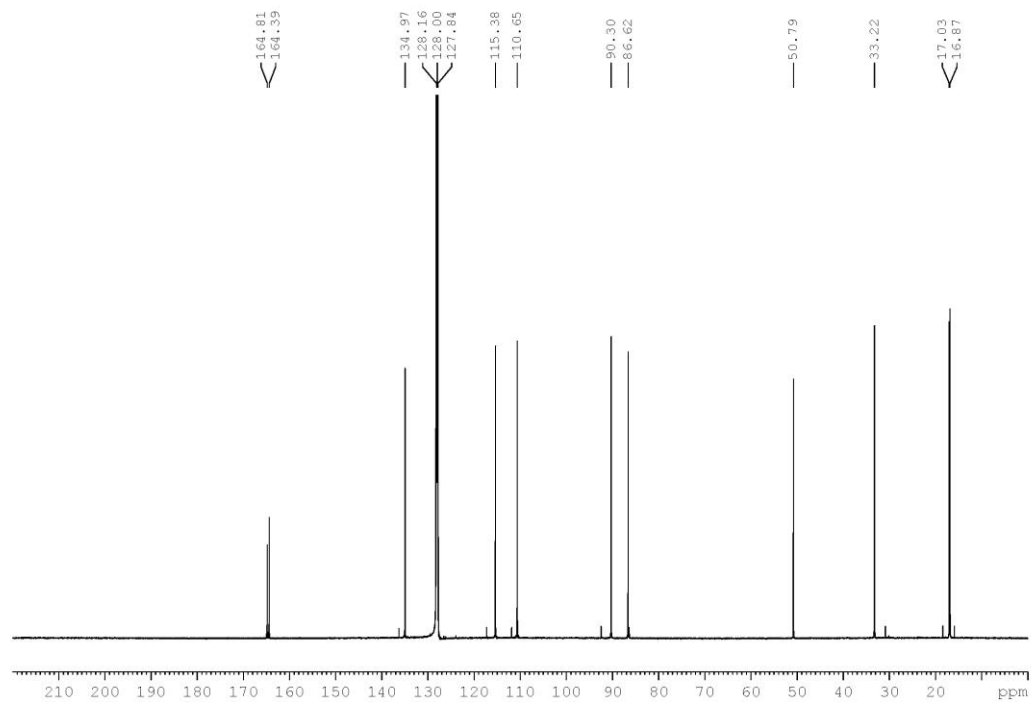



<sup>1</sup>H NMR Spectrum of **Z-13b** in CDCl<sub>3</sub>

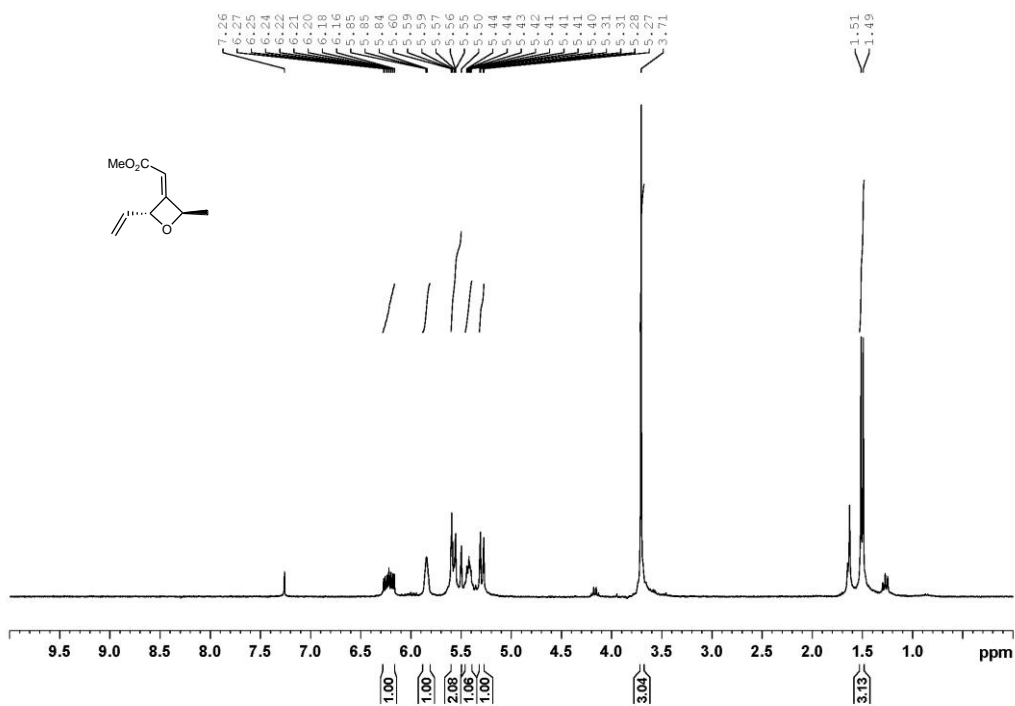

<sup>13</sup>C NMR Spectrum of **Z-13b** in CDCl<sub>3</sub>

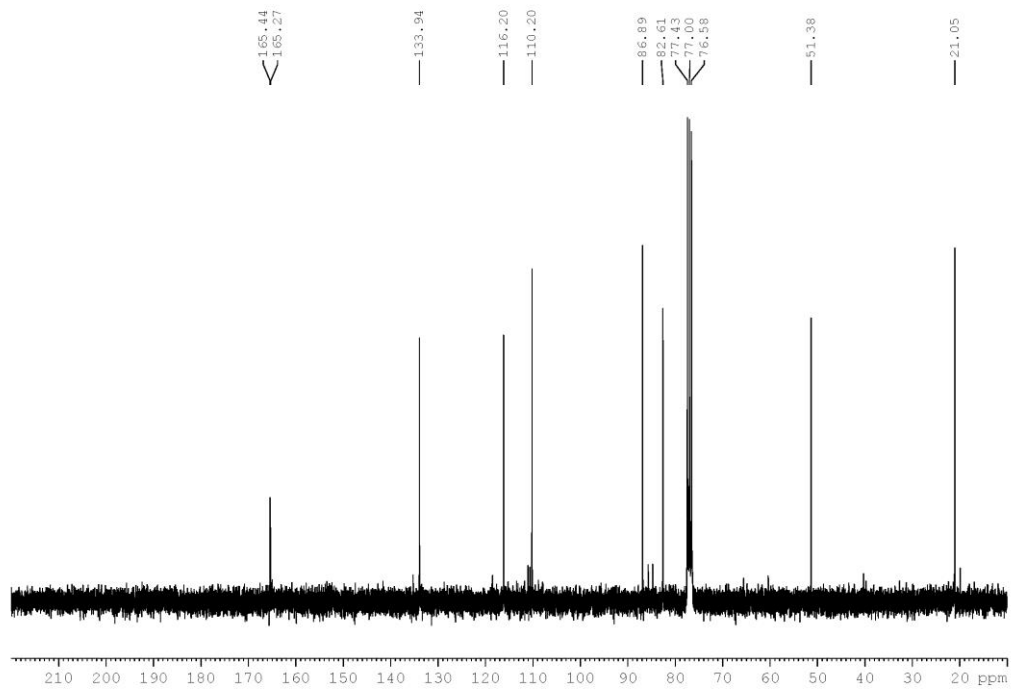

# $^1\text{H}$ NMR Spectrum of **Z-13c** in $\text{CDCl}_3$

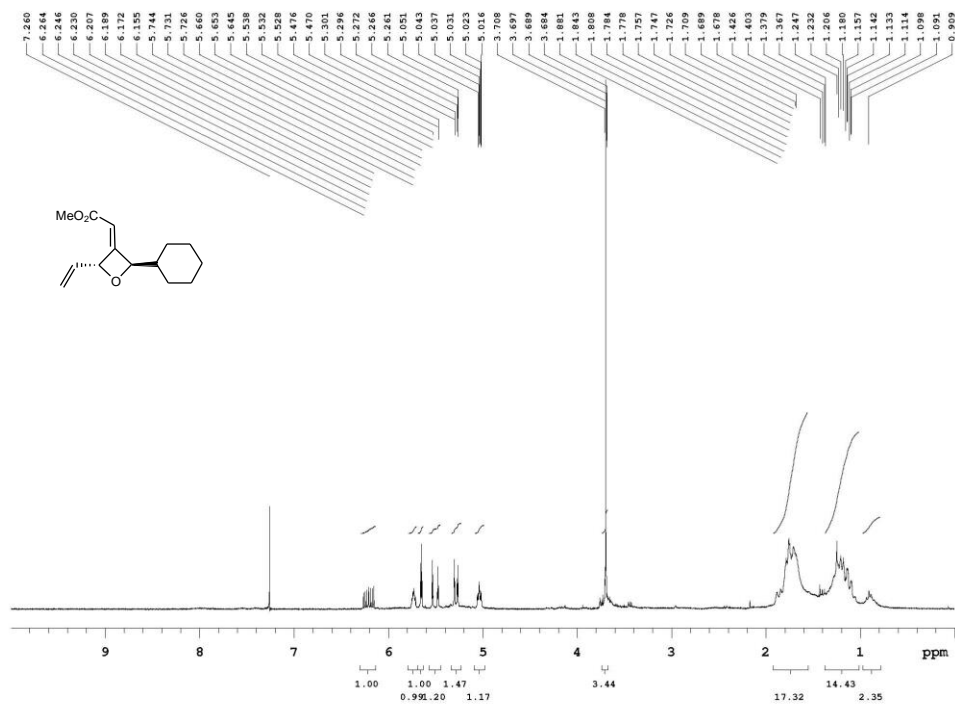

# $^{13}\text{C}$ NMR Spectrum of **Z-13c** in $\text{CDCl}_3$

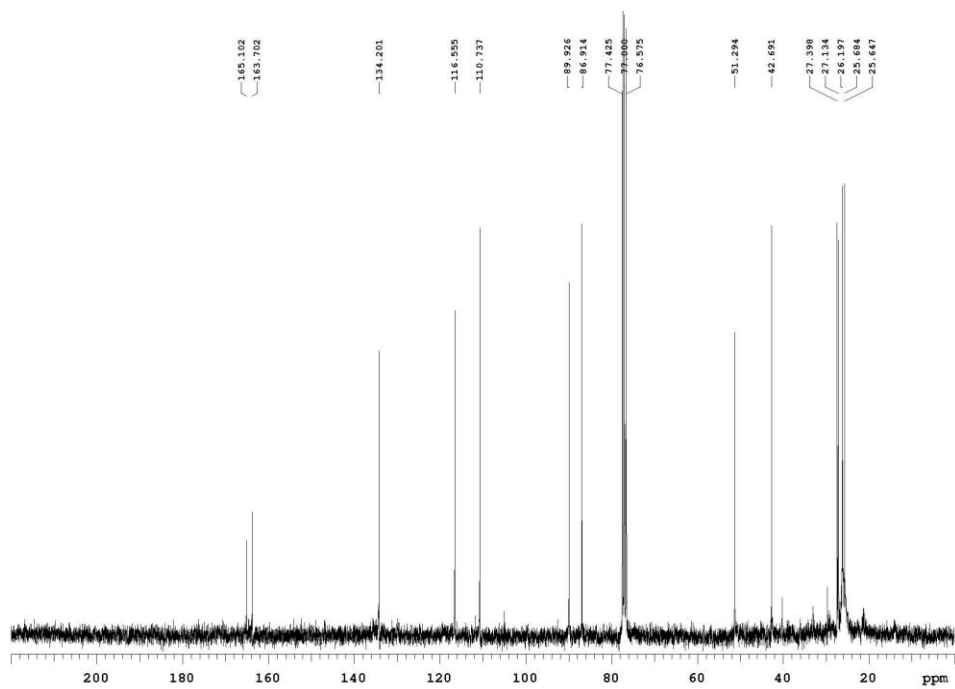



### <sup>1</sup>H NMR Spectrum of **Z-13c** in C<sub>6</sub>D<sub>6</sub>

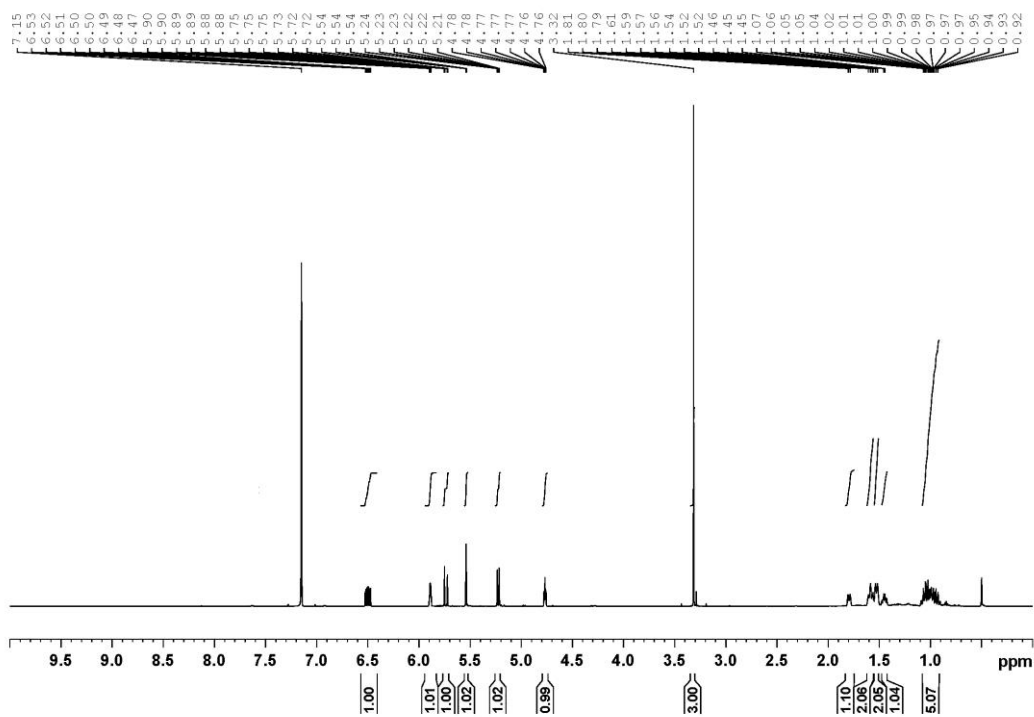

### <sup>13</sup>C NMR Spectrum of **Z-13c** in C<sub>6</sub>D<sub>6</sub>

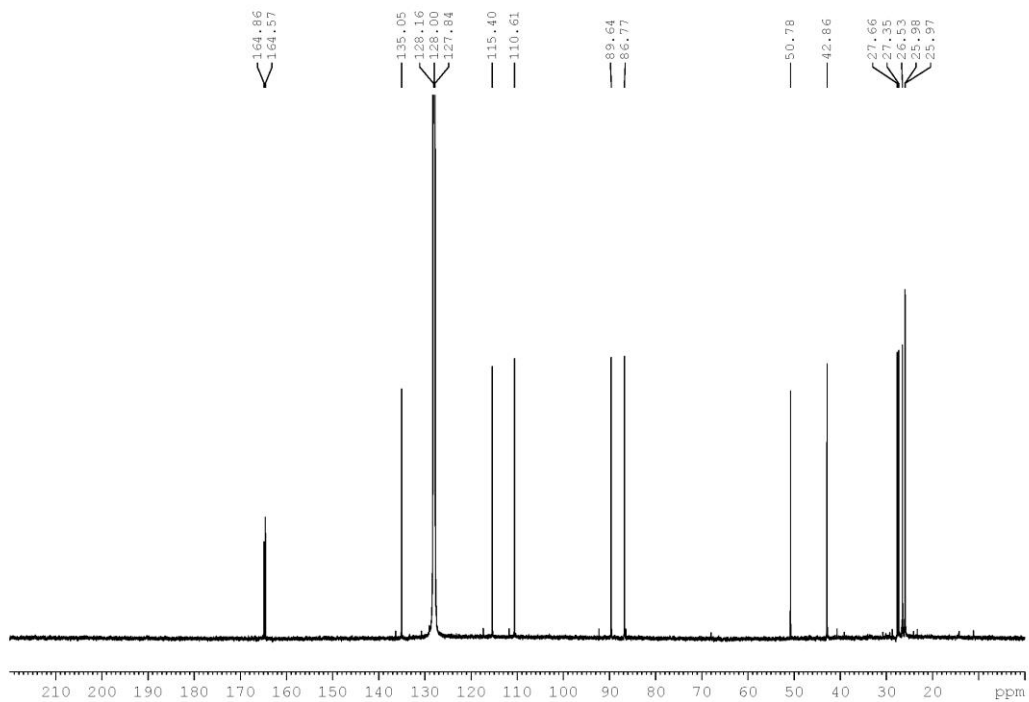



# <sup>1</sup>H NMR Spectrum of **Z-13e** in CDCl<sub>3</sub>

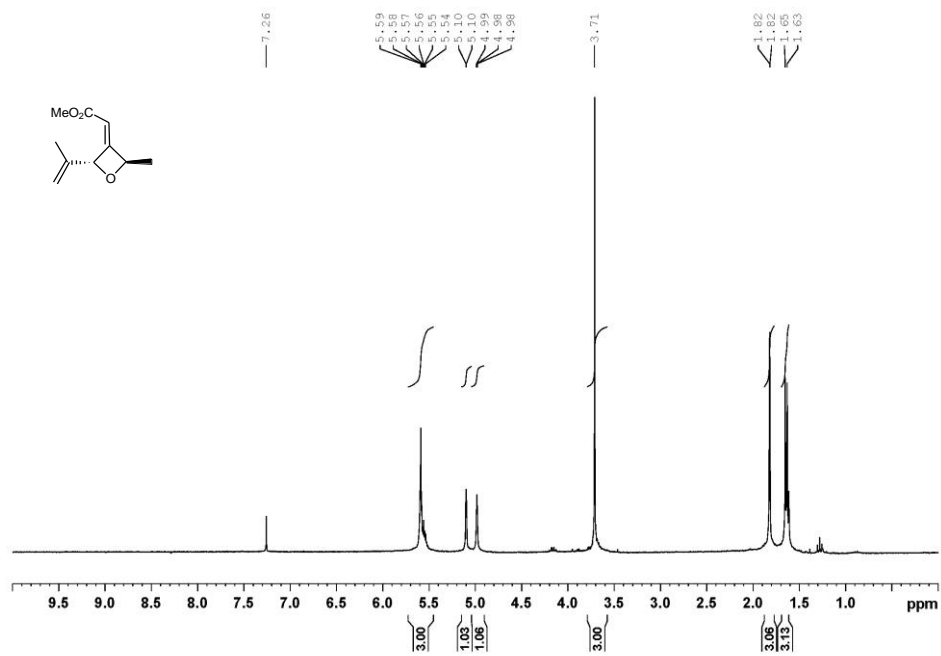

# <sup>13</sup>C NMR Spectrum of **Z-13e** in CDCl<sub>3</sub>

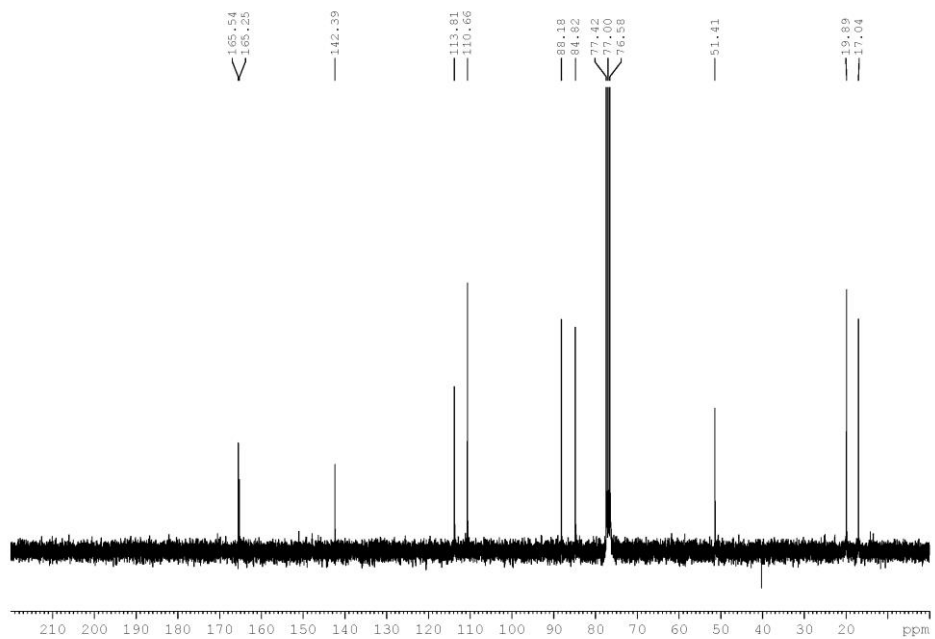

$^1\text{H}$  NMR Spectrum of *E*-13e in  $\text{CDCl}_3$

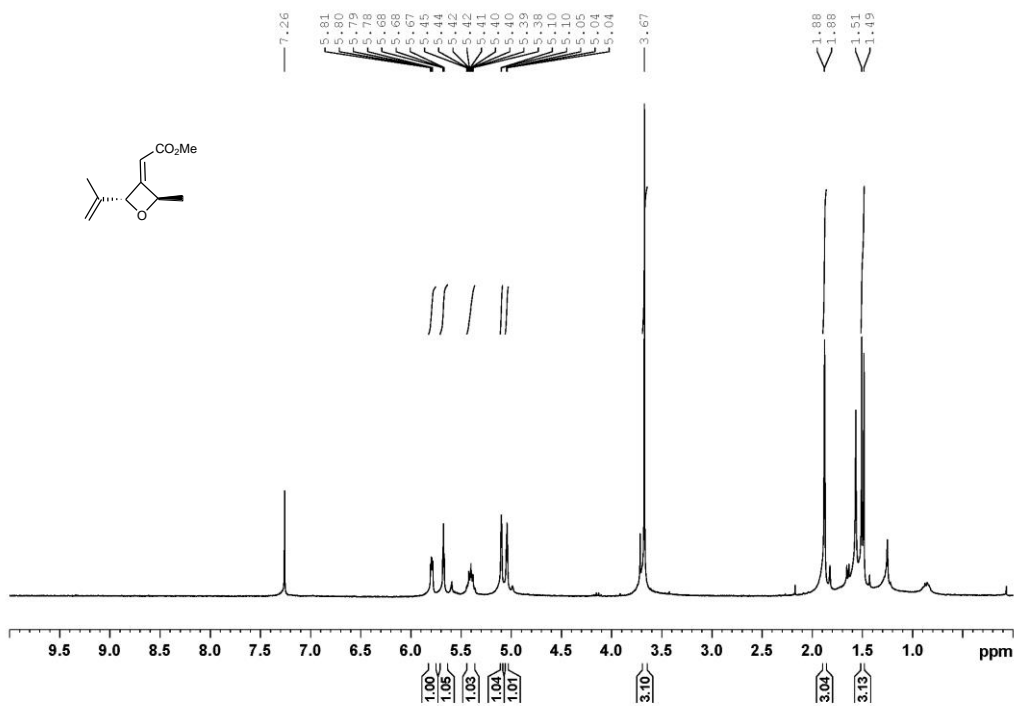

$^{13}\text{C}$  NMR Spectrum of *E*-13e in  $\text{CDCl}_3$

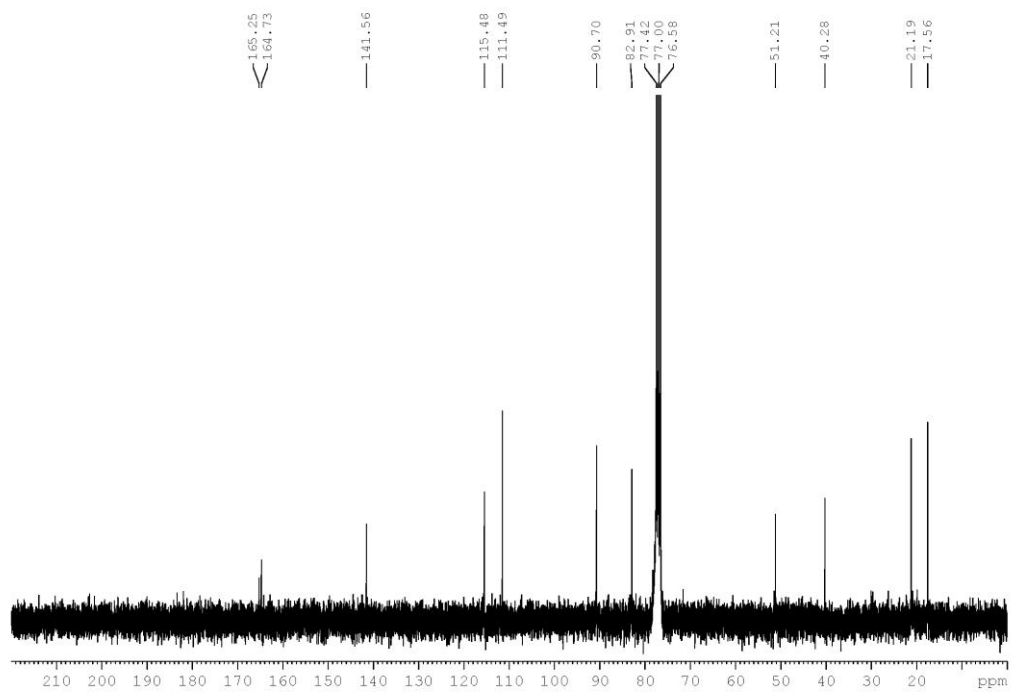

### <sup>1</sup>H NMR Spectrum of **Z-13f** in CDCl<sub>3</sub>

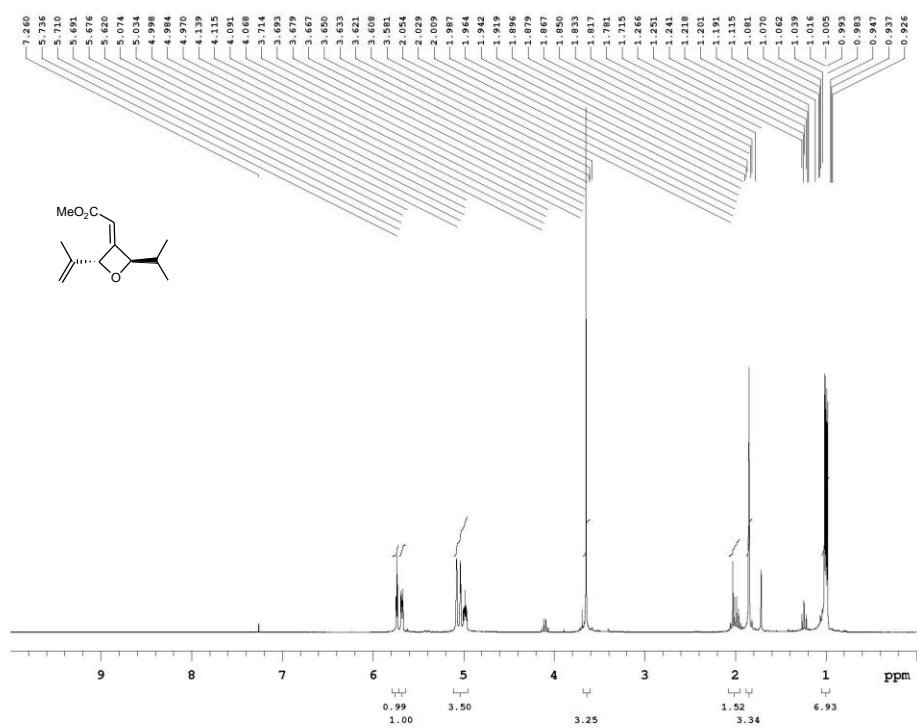

### <sup>13</sup>C NMR Spectrum of **Z-13f** in CDCl<sub>3</sub>

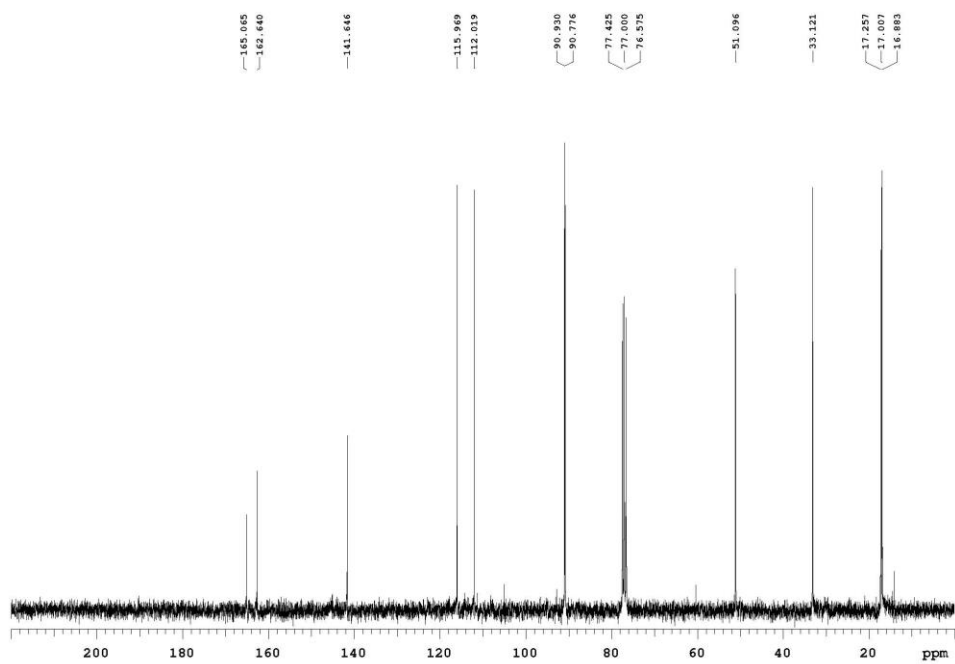

### NOESY Spectrum of Z-13f in CDCl<sub>3</sub>

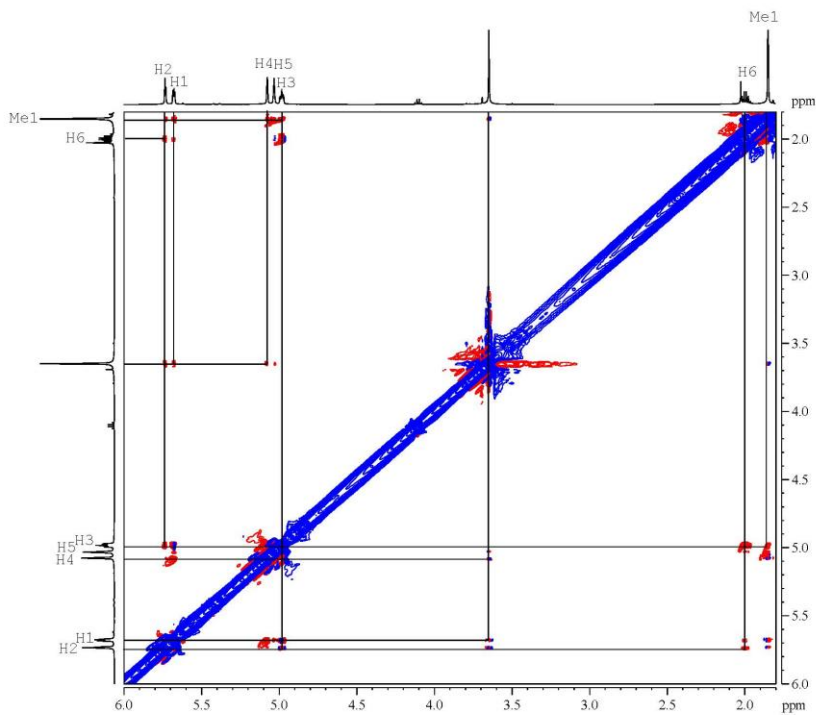

```

Current Data Parameters
NAME          acetate-001-172
EXPNO        1
PROCNO       1

F2 - Acquisition Parameters
Date_         20100225
Time          01:23
INSTRUM      spect
PROBHD       5 mm BBOBO BE-
PULPROG      zgpg30
SFOCK        noneqspol
SD           3248
SOLVENT      CDCl3
NS           16
DS           4
SWH          2700.704 Hz
FIDRES      0.000448 Hz
AQ          0.2745000 sec
RG          655.000
SQ          135.000 usec
DE          6.50 usec
TE          300.2 K
DO          0.0001194 sec
D1          1.1747300 sec
d11         0.4000000 sec
d12         0.0000000 sec
IMB         0.0007000 sec

===== CHANNEL f1 =====
NUC1         1H
P1           12.00 usec
PL           0.00 dB
SFO1         500.1314 MHz
RF1W         19.1720795 W
RFUC         500.1314015 MHz

===== GRABINT CHANNEL =====
GBRAB1      FIDB.100
SFO2         400.00 MHz
P1B          1000.00 usec

F1 - Acquisition parameters
SD           3248
SFO1         500.1314 MHz
FIDRES      0.000448 Hz
AQ          0.2745000 sec
RG          655.000
SQ          135.000 usec
DE          6.50 usec
TE          300.2 K
DO          0.0001194 sec
D1          1.1747300 sec
d11         0.4000000 sec
d12         0.0000000 sec
IMB         0.0007000 sec

F1 - Processing parameters
SI           32768
SF           500.1300117 MHz
WDW          EM
SSB          0 Hz
GB           0
PC           1.00

F1 - Processing parameters
SI           16384
SF           500.1300117 MHz
WDW          EM
SSB          0 Hz
GB           0
PC           1.00
    
```

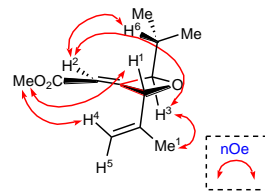

### HSQC Spectrum of Z-13f in CDCl<sub>3</sub>

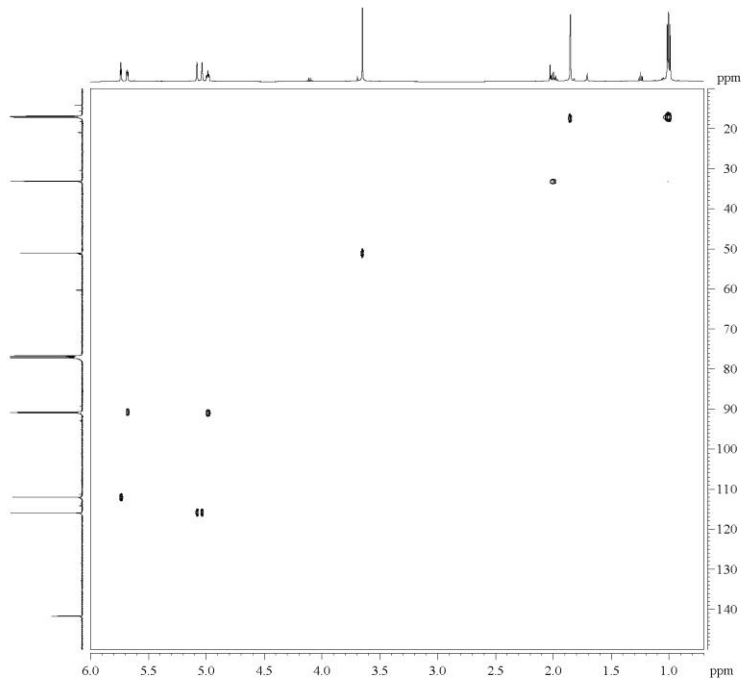

```

Current Data Parameters
NAME          acetate-001-172
EXPNO        1
PROCNO       1

F2 - Acquisition Parameters
Date_         20100225
Time          01:23
INSTRUM      spect
PROBHD       5 mm BBOBO BE-
PULPROG      zgpg30
SFOCK        noneqspol
SD           3248
SOLVENT      CDCl3
NS           16
DS           4
SWH          2700.704 Hz
FIDRES      0.000448 Hz
AQ          0.2745000 sec
RG          655.000
SQ          135.000 usec
DE          6.50 usec
TE          300.2 K
DO          0.0001194 sec
D1          1.1747300 sec
d11         0.4000000 sec
d12         0.0000000 sec
IMB         0.0007000 sec

===== CHANNEL f1 =====
NUC1         1H
P1           12.00 usec
PL           0.00 dB
SFO1         500.1314 MHz
RF1W         19.1720795 W
RFUC         500.1314015 MHz

===== GRABINT CHANNEL =====
GBRAB1      FIDB.100
SFO2         400.00 MHz
P1B          1000.00 usec

F1 - Acquisition parameters
SD           32768
SFO1         500.1300117 MHz
FIDRES      0.000448 Hz
AQ          0.2745000 sec
RG          655.000
SQ          135.000 usec
DE          6.50 usec
TE          300.2 K
DO          0.0001194 sec
D1          1.1747300 sec
d11         0.4000000 sec
d12         0.0000000 sec
IMB         0.0007000 sec

F1 - Processing parameters
SI           32768
SF           500.1300117 MHz
WDW          EM
SSB          0 Hz
GB           0
PC           1.00

F1 - Processing parameters
SI           16384
SF           500.1300117 MHz
WDW          EM
SSB          0 Hz
GB           0
PC           1.00
    
```

<sup>1</sup>H NMR Spectrum of *E*-13f in CDCl<sub>3</sub>

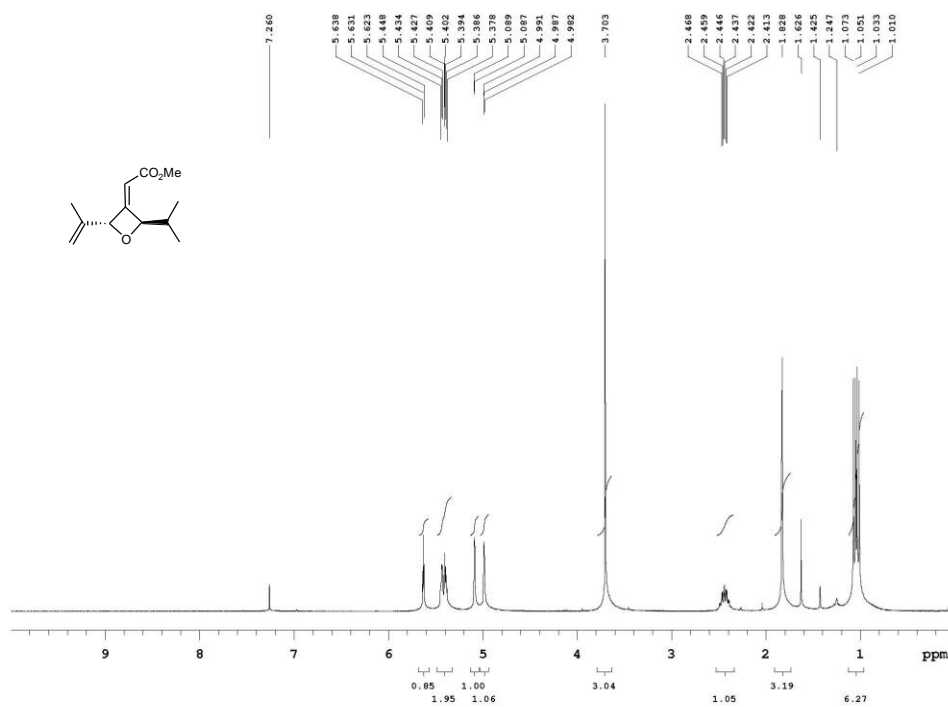

<sup>13</sup>C NMR Spectrum of *E*-13f in CDCl<sub>3</sub>

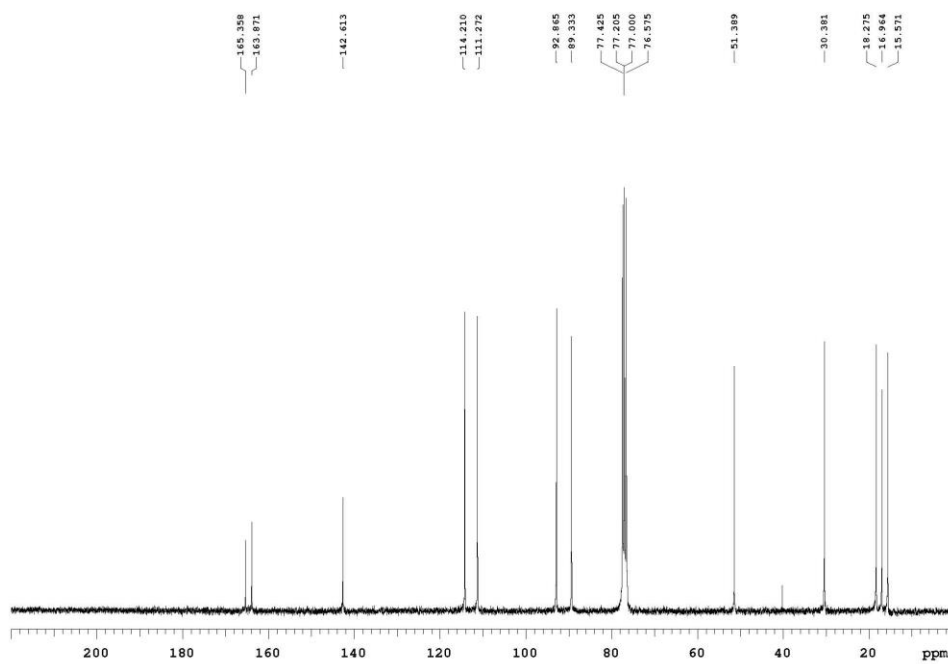

### $^1\text{H}$ NMR Spectra of *Z*-13g and *E*-13g in $\text{C}_6\text{D}_6$

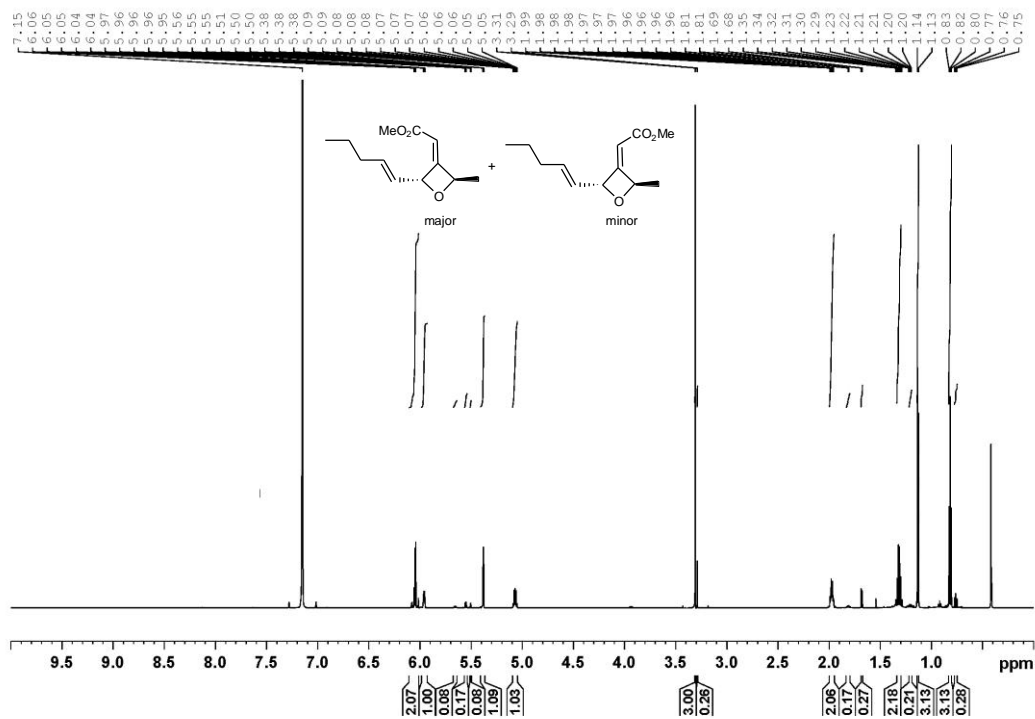

### $^{13}\text{C}$ NMR Spectra of *Z*-13g and *E*-13g in $\text{C}_6\text{D}_6$

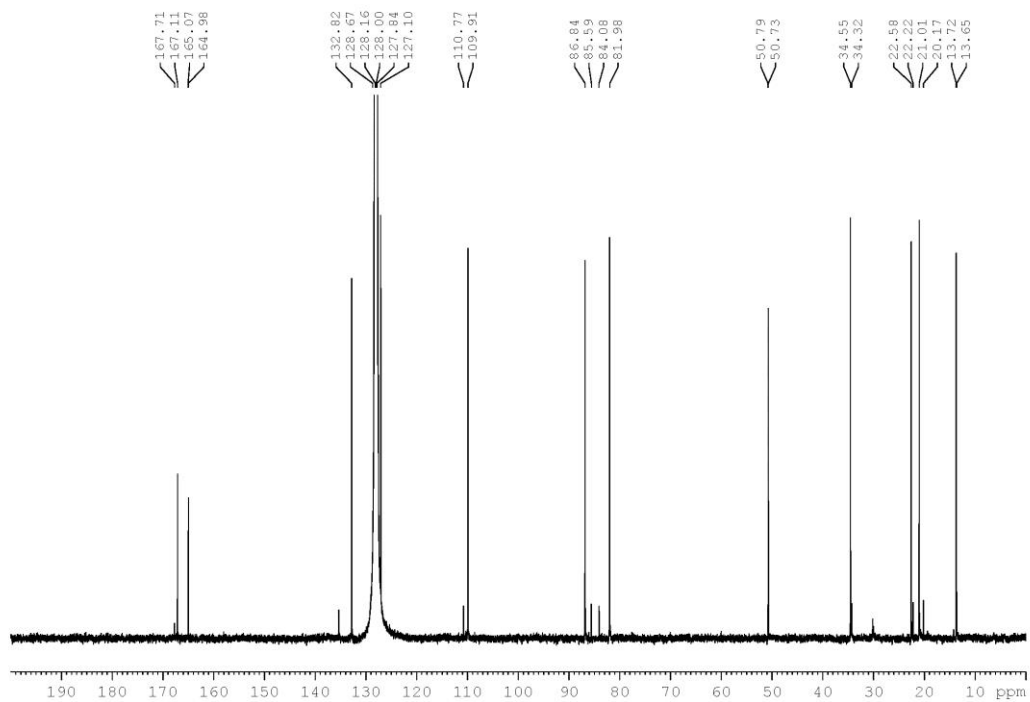





<sup>1</sup>H NMR Spectra of *Z*-13h and *E*-13h in C<sub>6</sub>D<sub>6</sub>

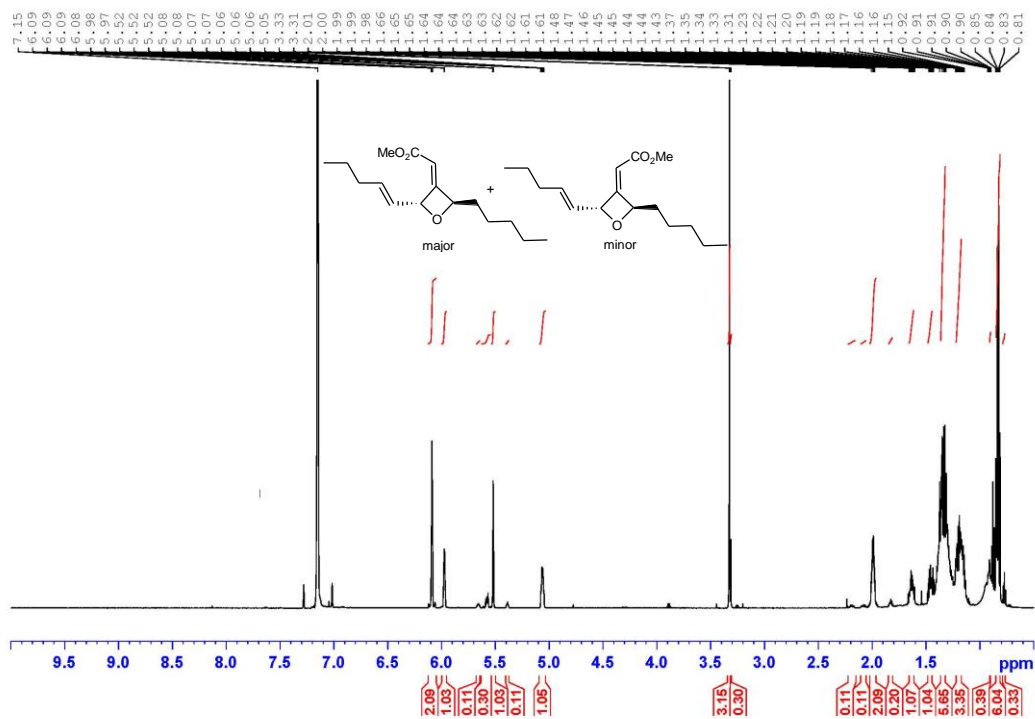

<sup>13</sup>C NMR Spectra of *Z*-13h and *E*-13h in C<sub>6</sub>D<sub>6</sub>

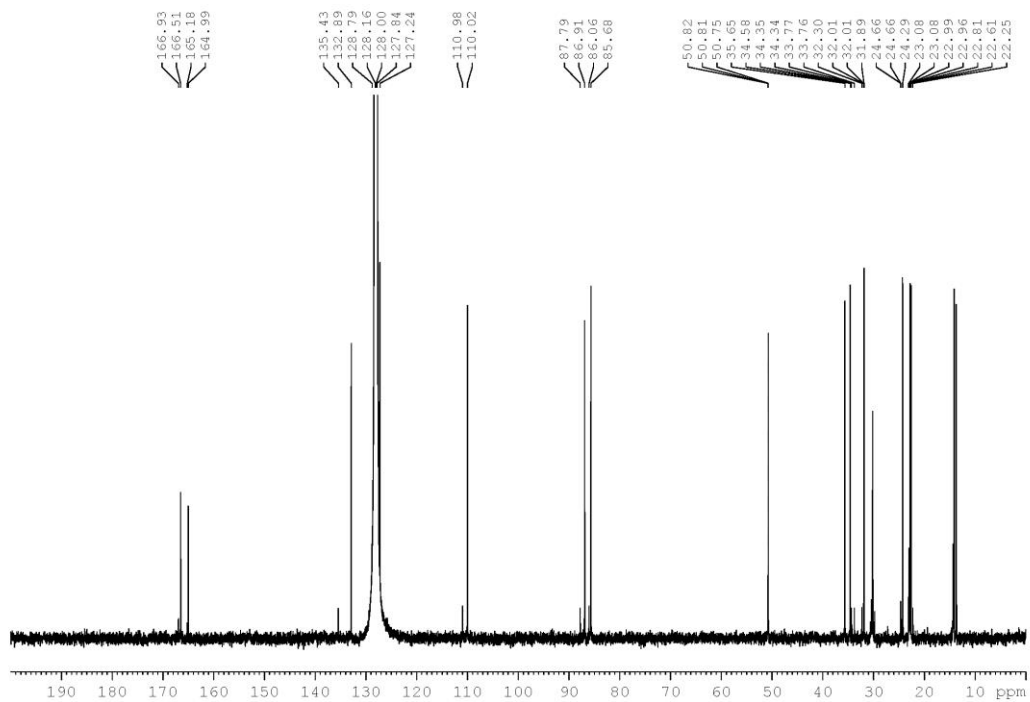



# <sup>1</sup>H NMR Spectrum of **Z-13i** in CDCl<sub>3</sub>

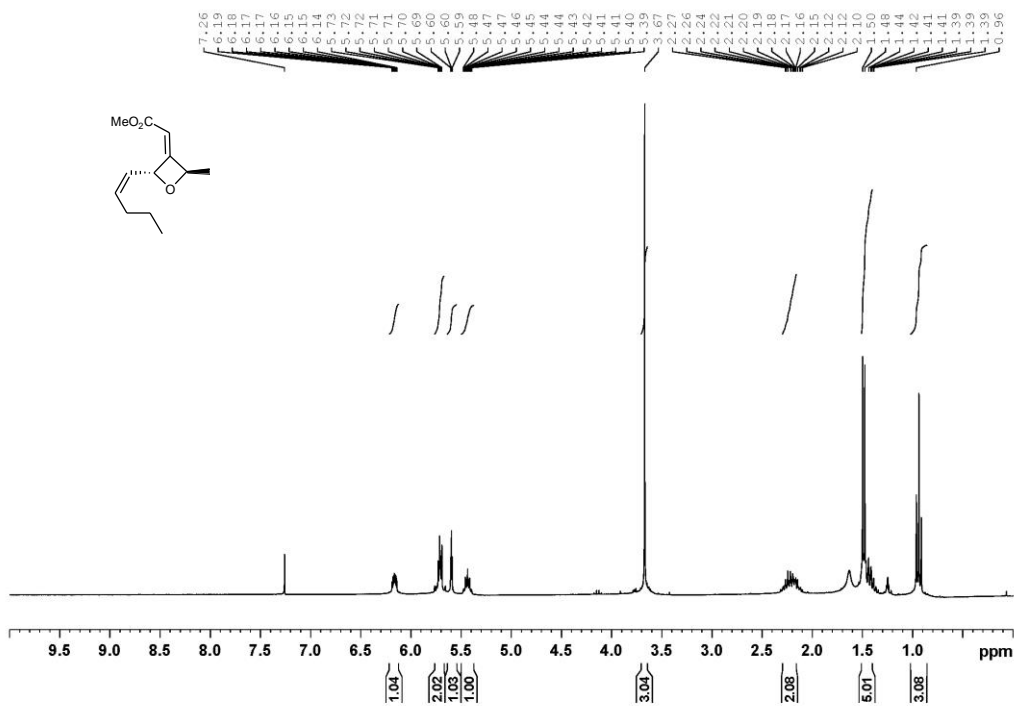

# <sup>13</sup>C NMR Spectrum of **Z-13i** in CDCl<sub>3</sub>

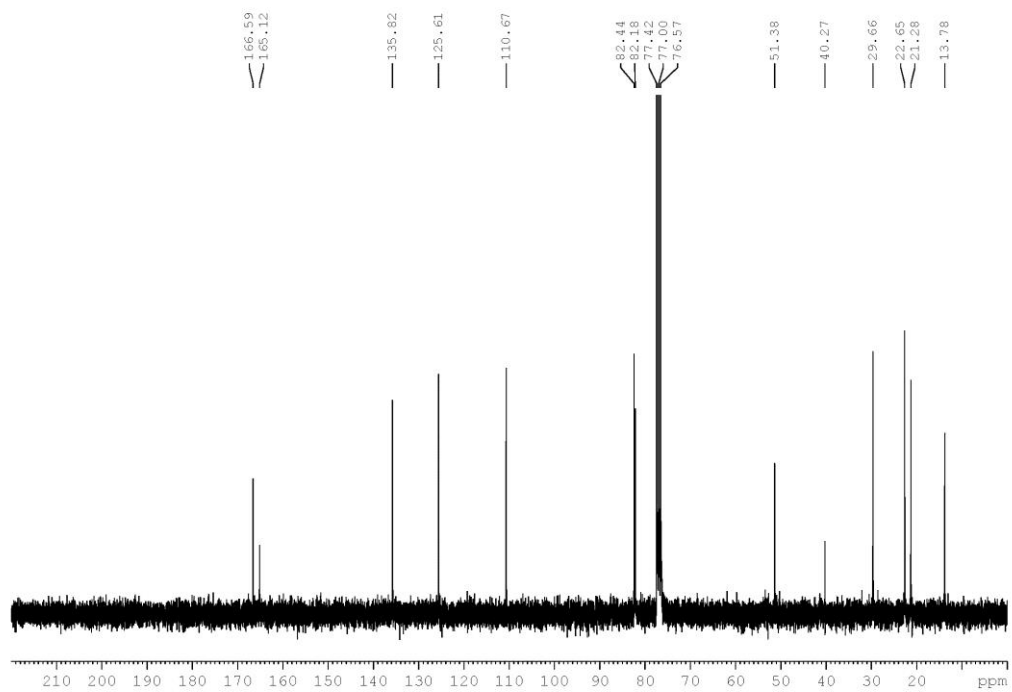

### $^1\text{H}$ NMR Spectrum of *E*-13i in $\text{CDCl}_3$

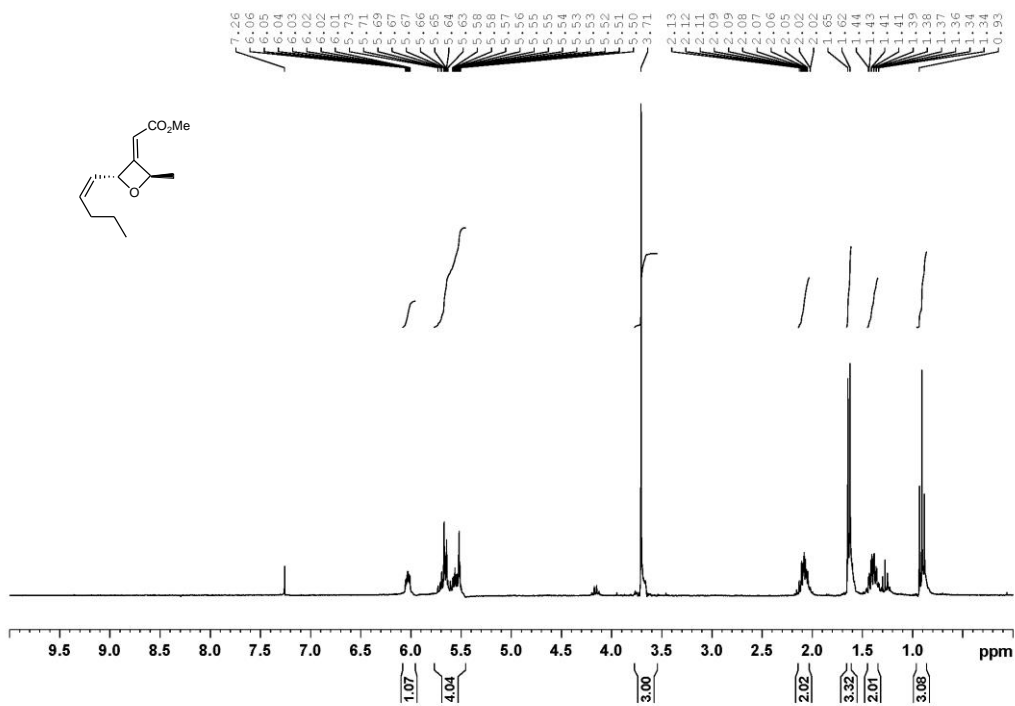

### $^{13}\text{C}$ NMR Spectrum of *E*-13i in $\text{CDCl}_3$

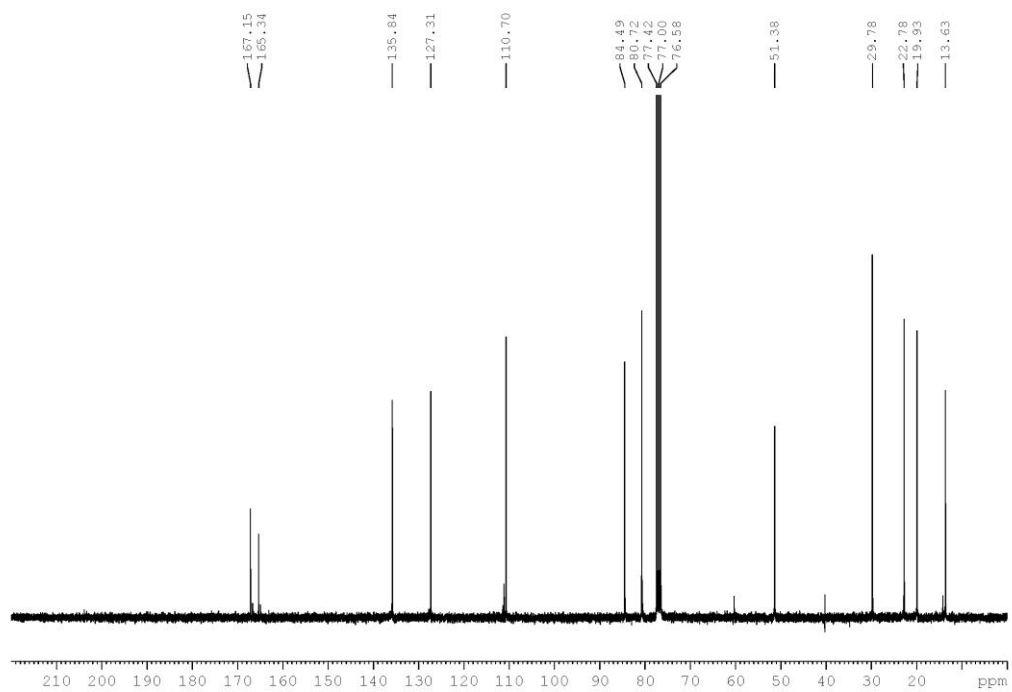

### <sup>1</sup>H NMR Spectrum of **Z-13j** in CDCl<sub>3</sub>

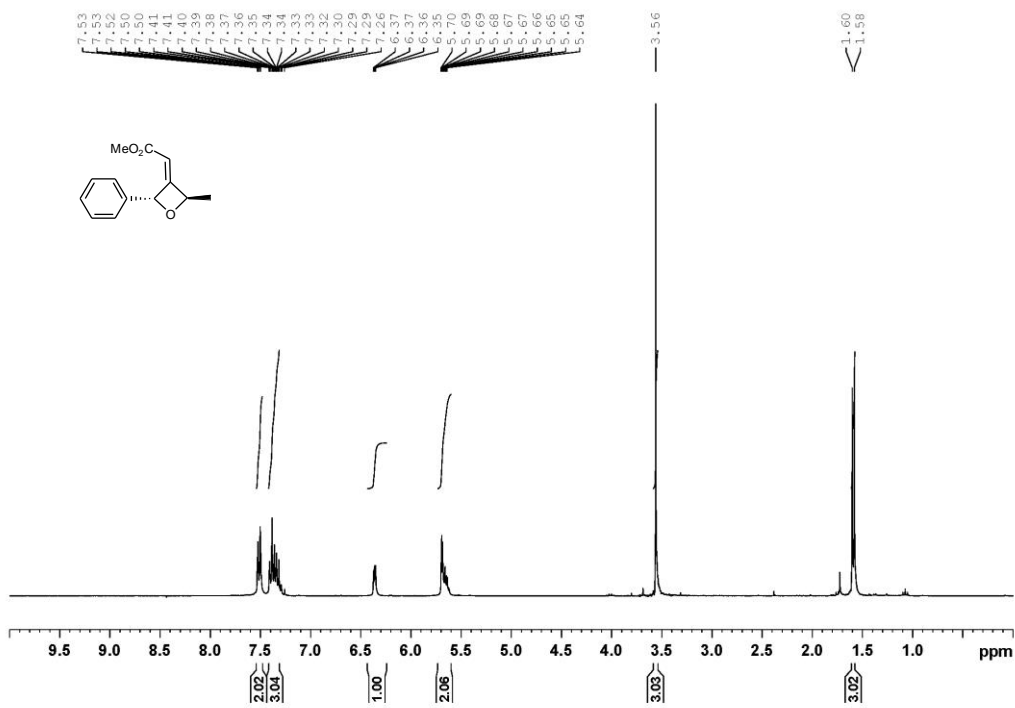

### <sup>13</sup>C NMR Spectrum of **Z-13j** in CDCl<sub>3</sub>

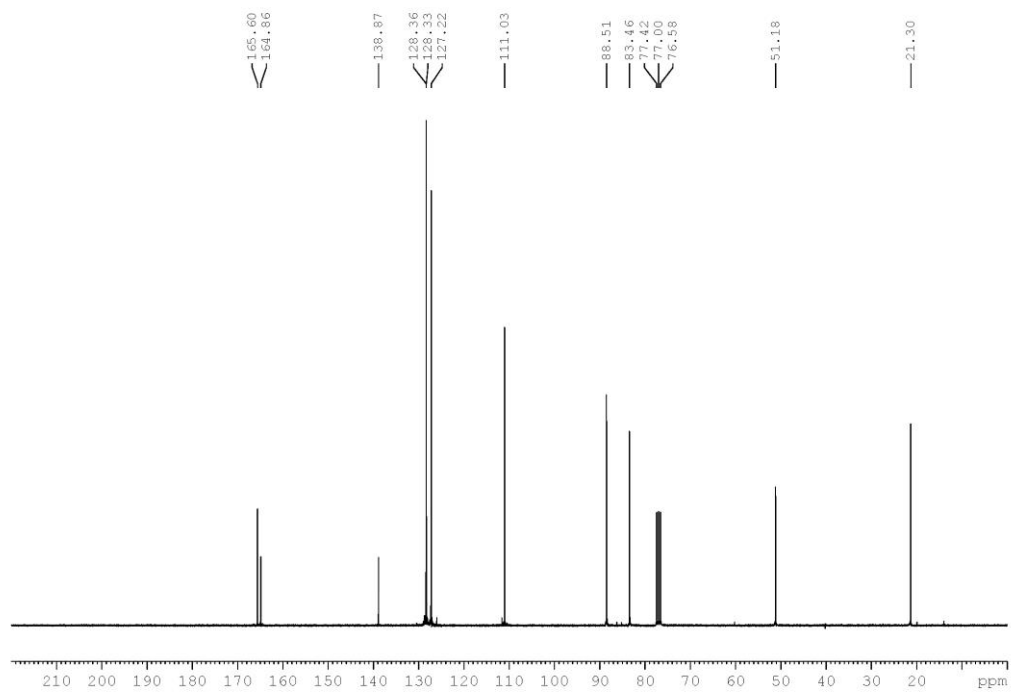







$^1\text{H}$  NMR Spectrum of *E*-13j in  $\text{C}_6\text{D}_6$

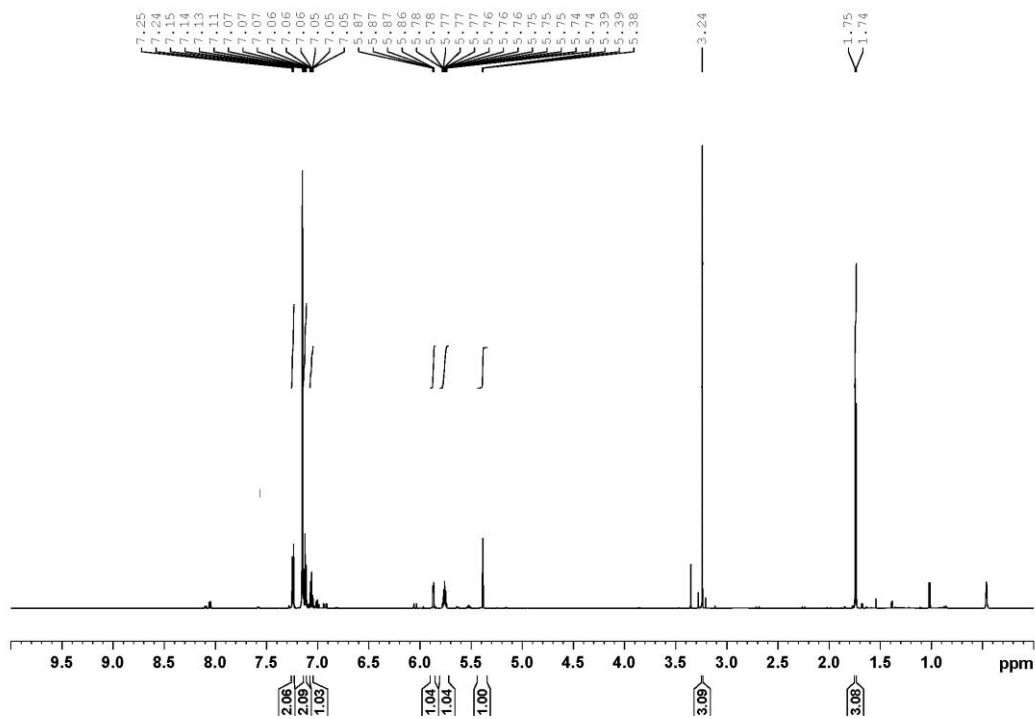

$^{13}\text{C}$  NMR Spectrum of *E*-13j in  $\text{C}_6\text{D}_6$

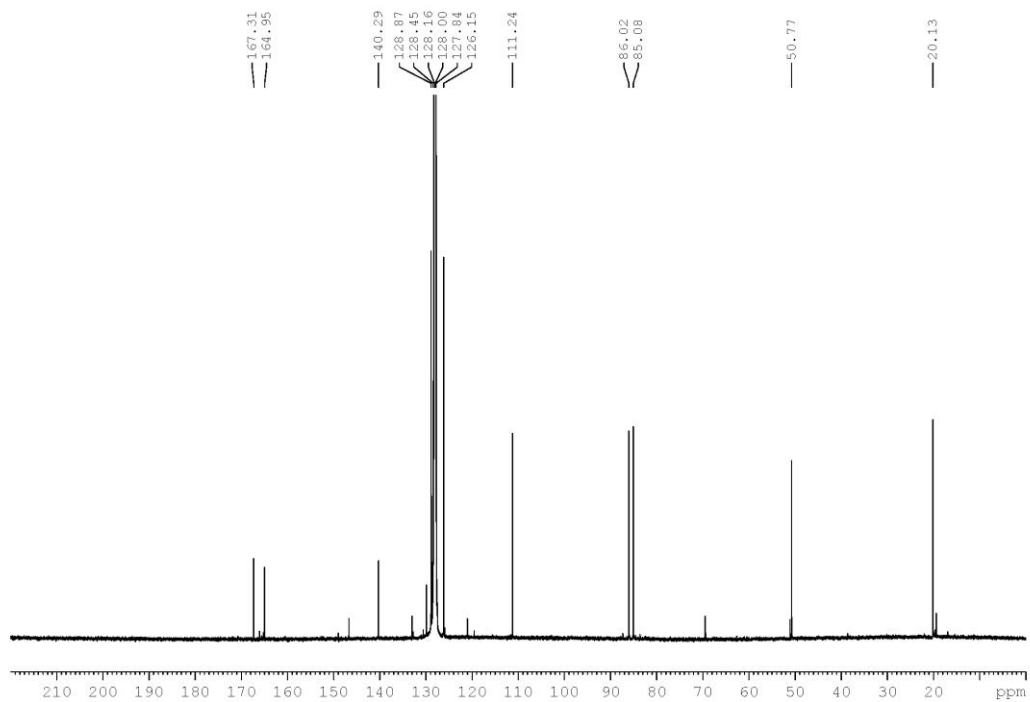

## NOESY Spectrum of *E*-13j in C<sub>6</sub>D<sub>6</sub>

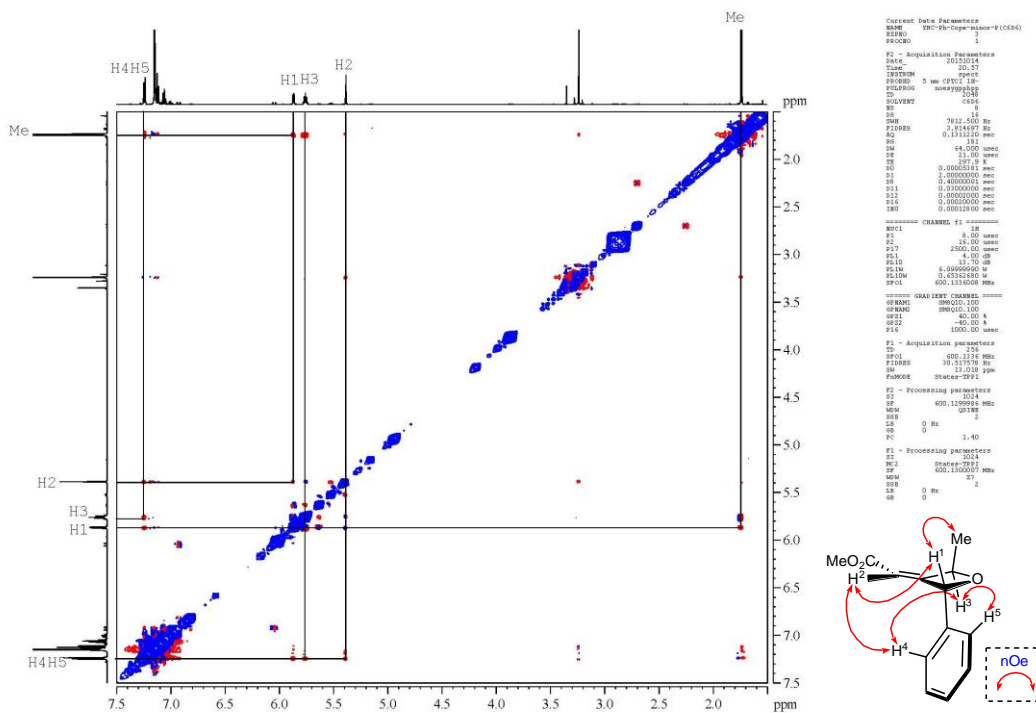

## HSQC Spectrum of *E*-13j in C<sub>6</sub>D<sub>6</sub>

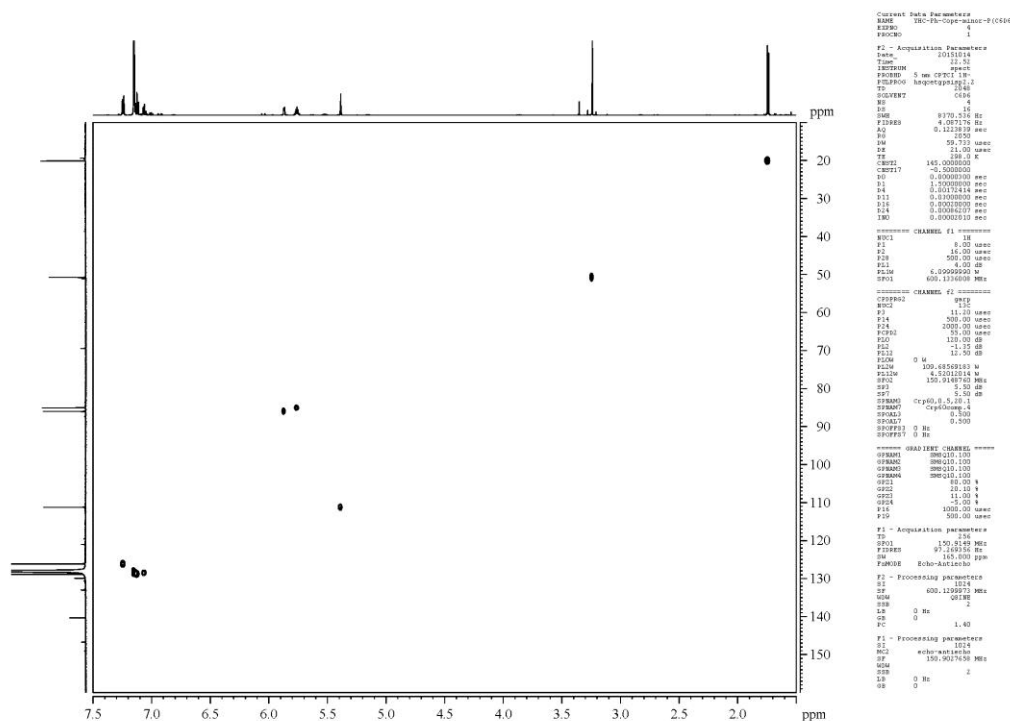

### <sup>1</sup>H NMR Spectrum of **Z-13k** in CDCl<sub>3</sub>

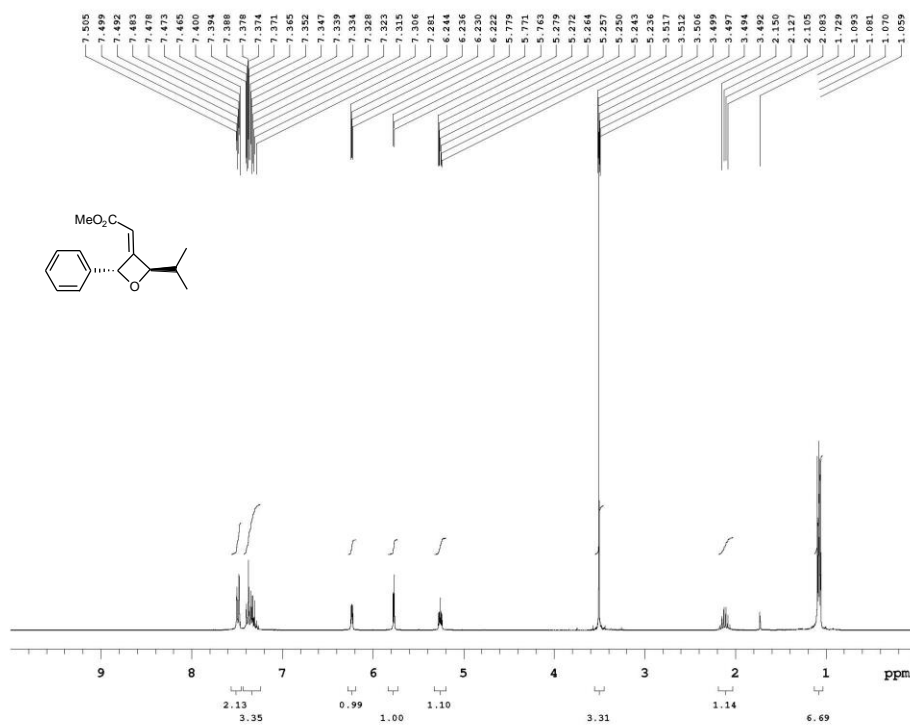

### <sup>13</sup>C NMR Spectrum of **Z-13k** in CDCl<sub>3</sub>

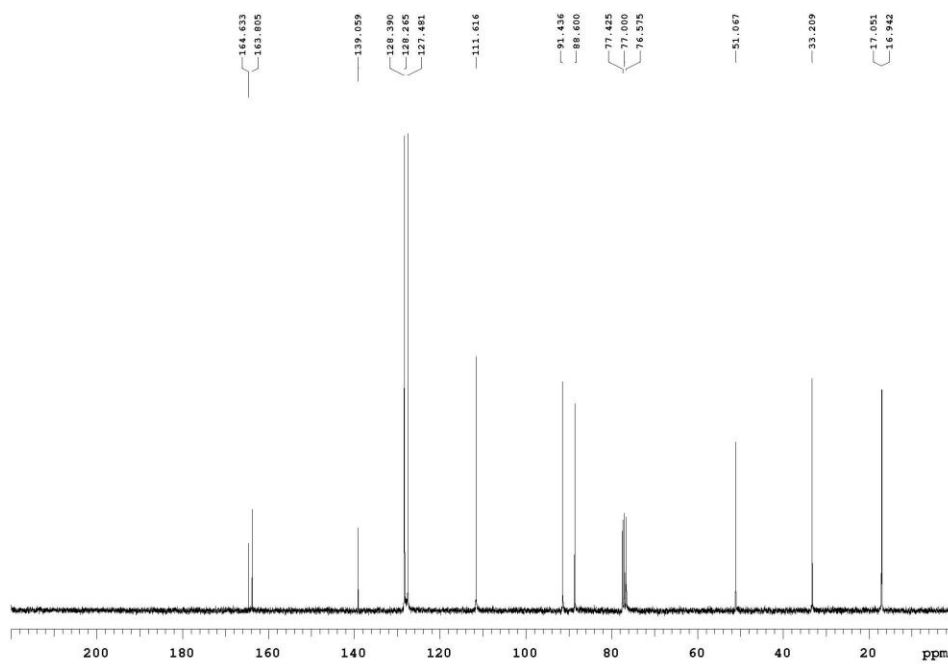



### <sup>1</sup>H NMR Spectrum of *E*-13k in CDCl<sub>3</sub>

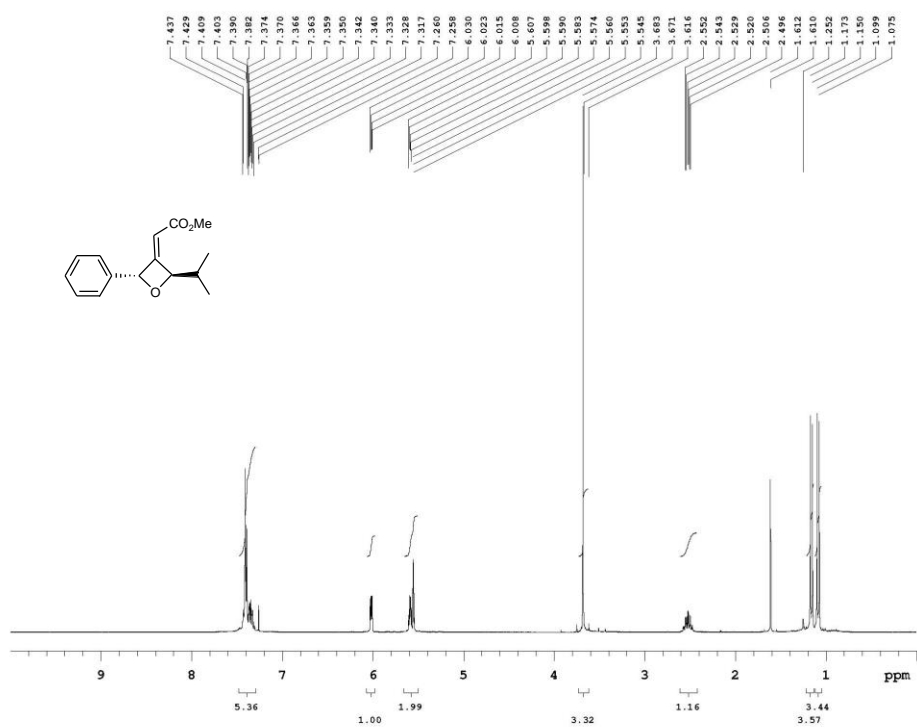

### <sup>13</sup>C NMR Spectrum of *E*-13k in CDCl<sub>3</sub>

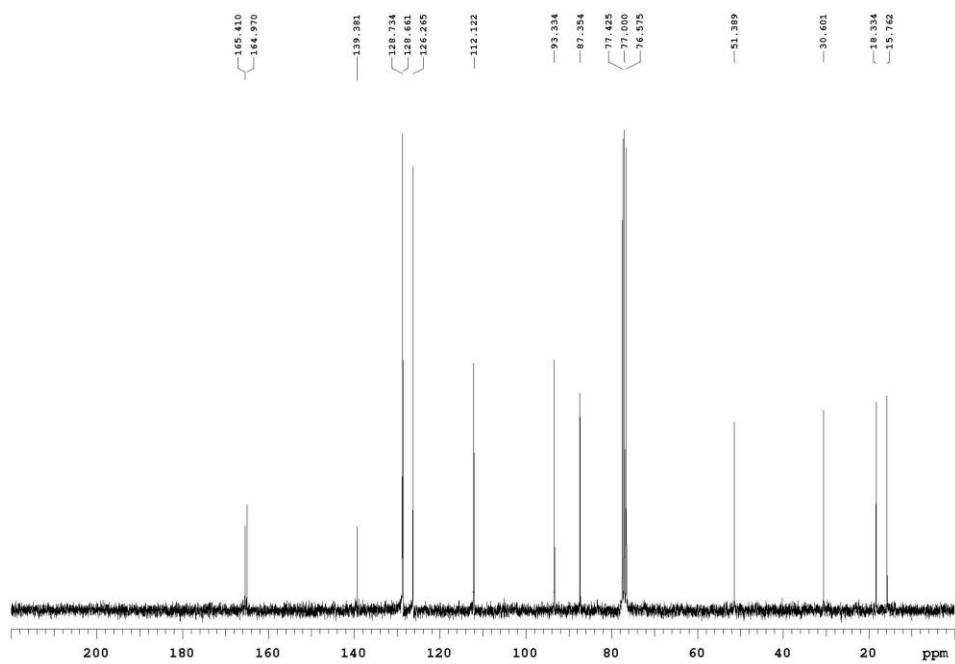

# <sup>1</sup>H NMR Spectrum of **Z-131** in CDCl<sub>3</sub>

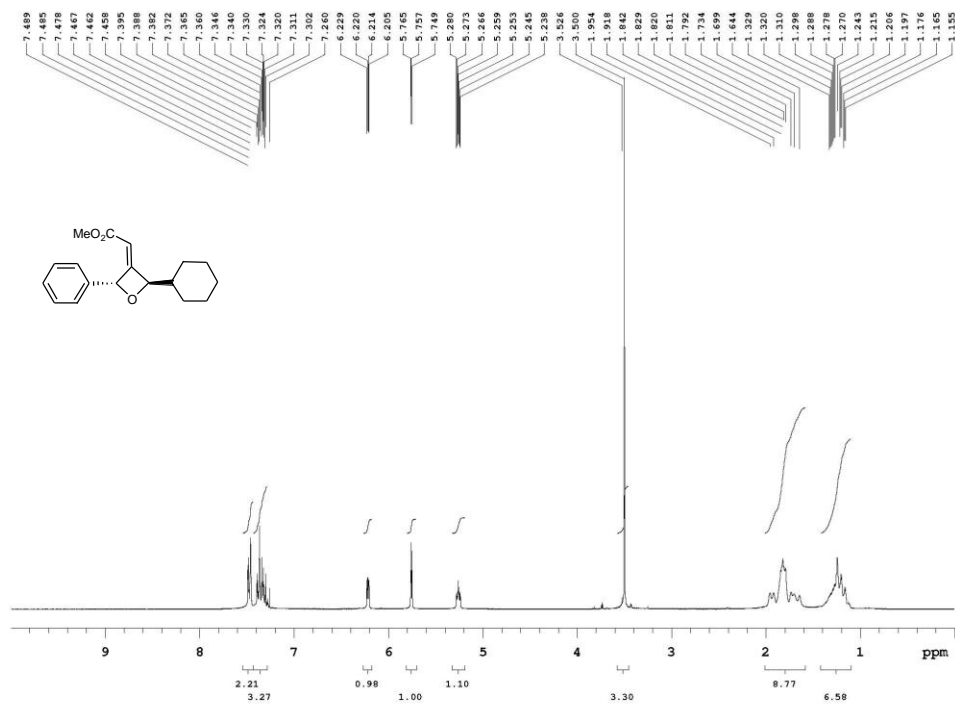

# <sup>13</sup>C NMR Spectrum of **Z-131** in CDCl<sub>3</sub>

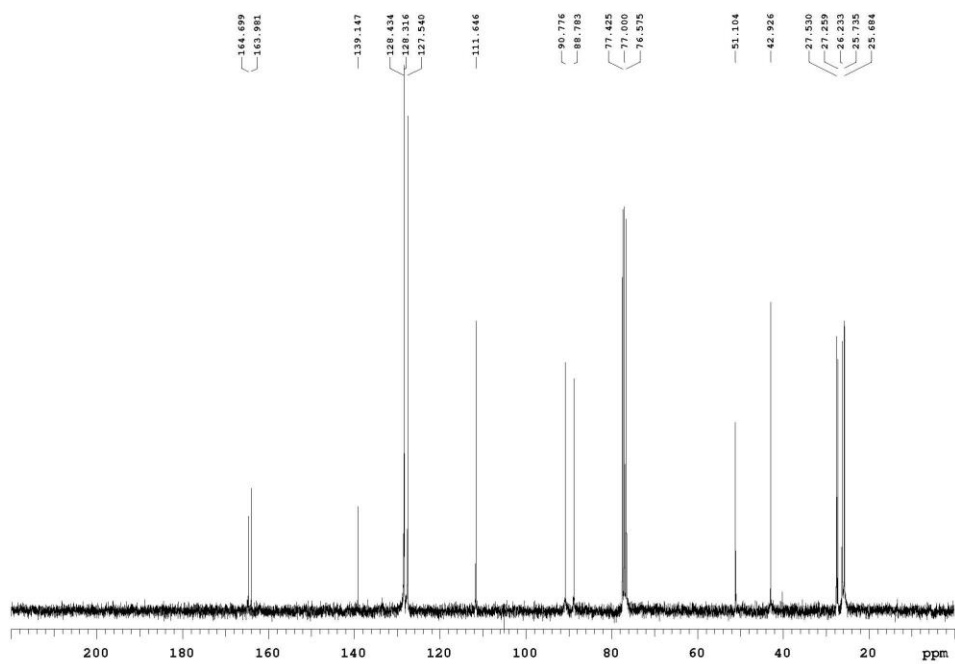

### <sup>1</sup>H NMR Spectrum of Z-131 in C<sub>6</sub>D<sub>6</sub>

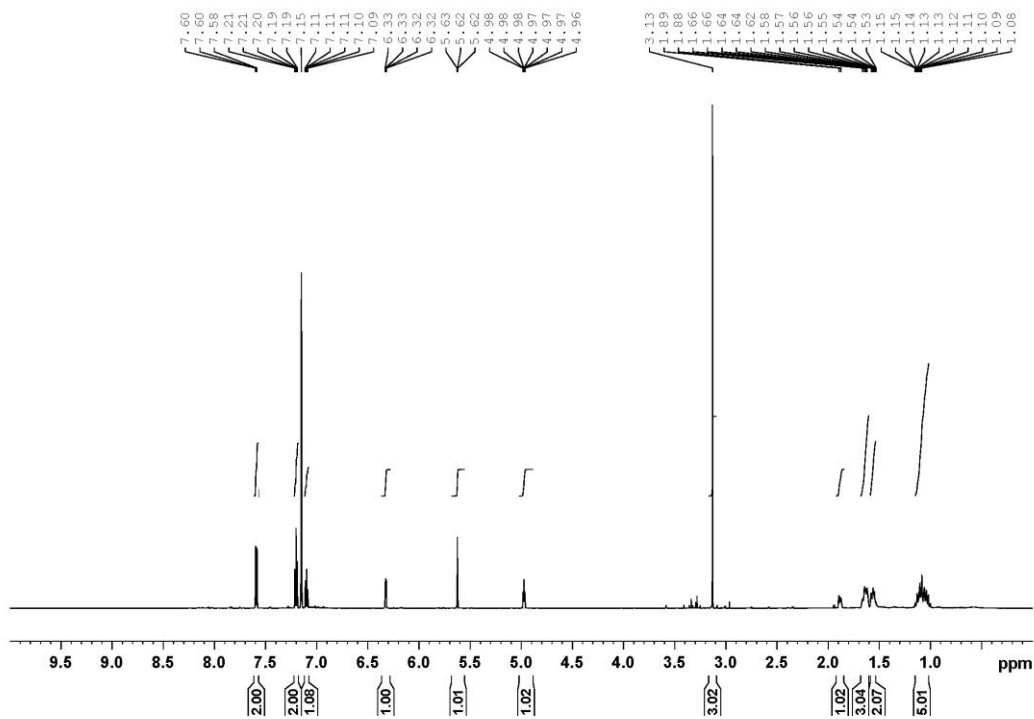

### <sup>13</sup>C NMR Spectrum of Z-131 in C<sub>6</sub>D<sub>6</sub>

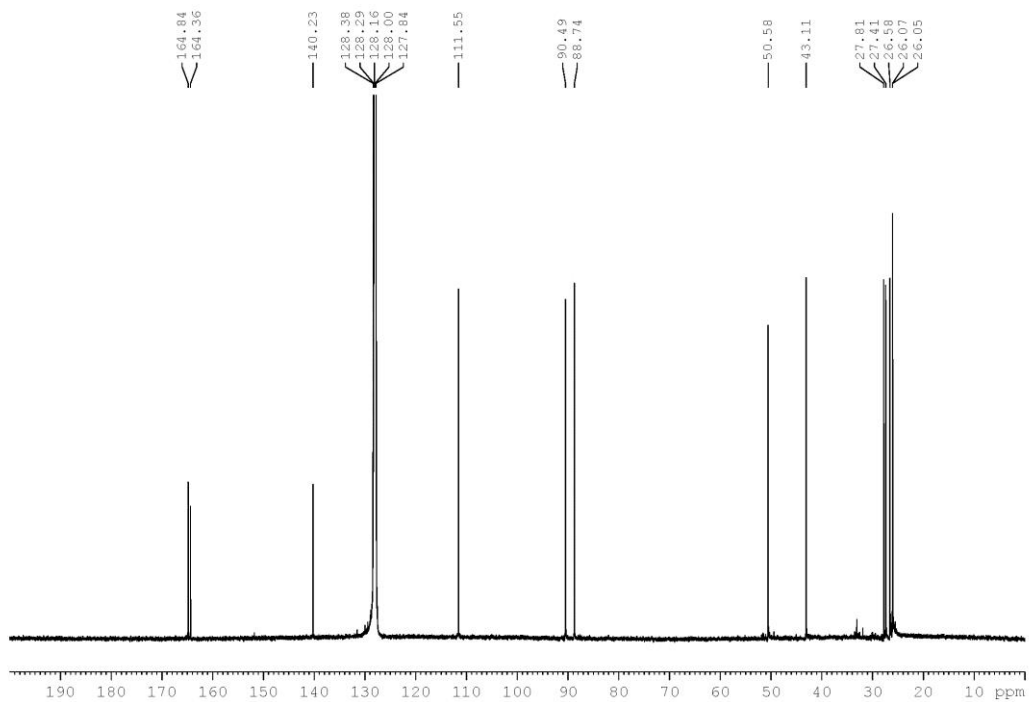







<sup>1</sup>H NMR Spectrum of *E*-13l in C<sub>6</sub>D<sub>6</sub>

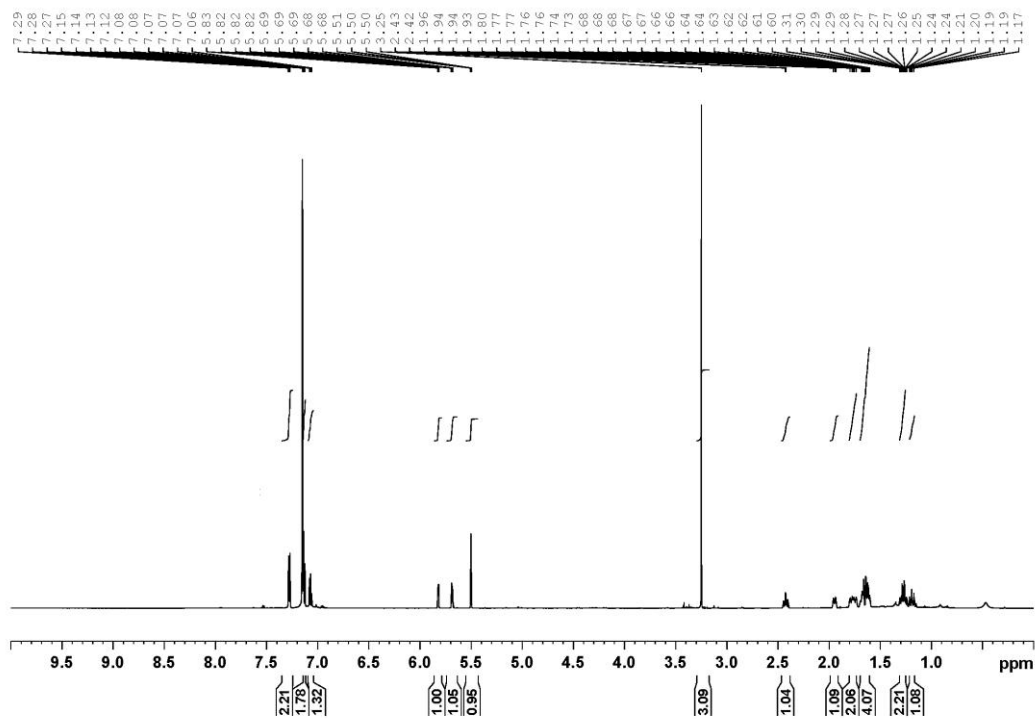

<sup>13</sup>C NMR Spectrum of *E*-13l in C<sub>6</sub>D<sub>6</sub>

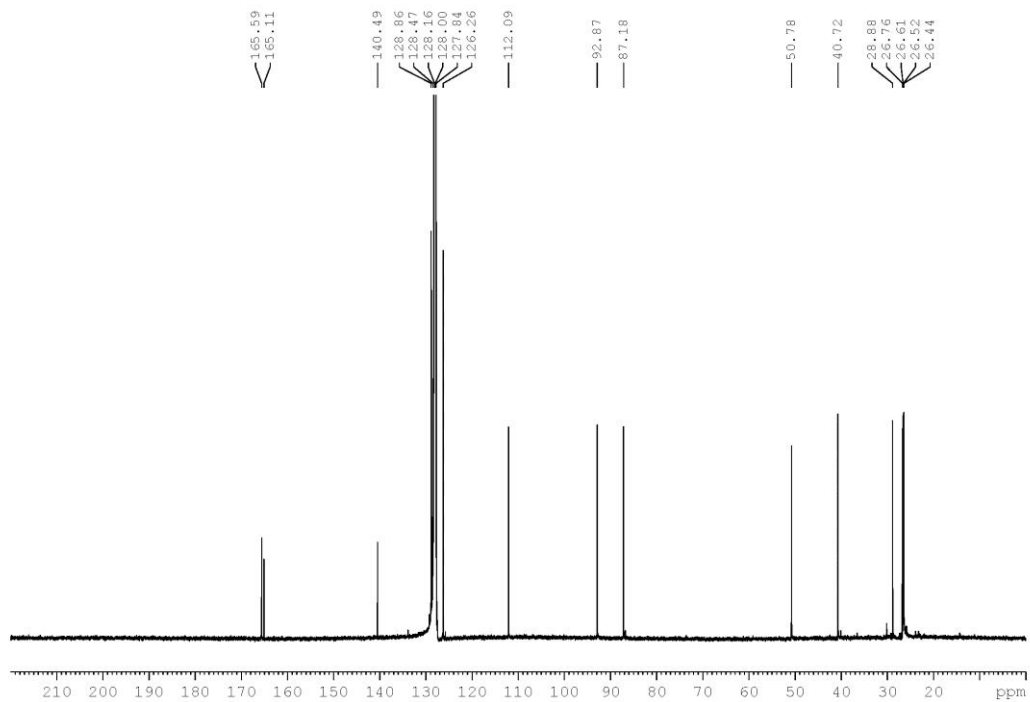

# NOESY Spectrum of *E*-131 in C<sub>6</sub>D<sub>6</sub>

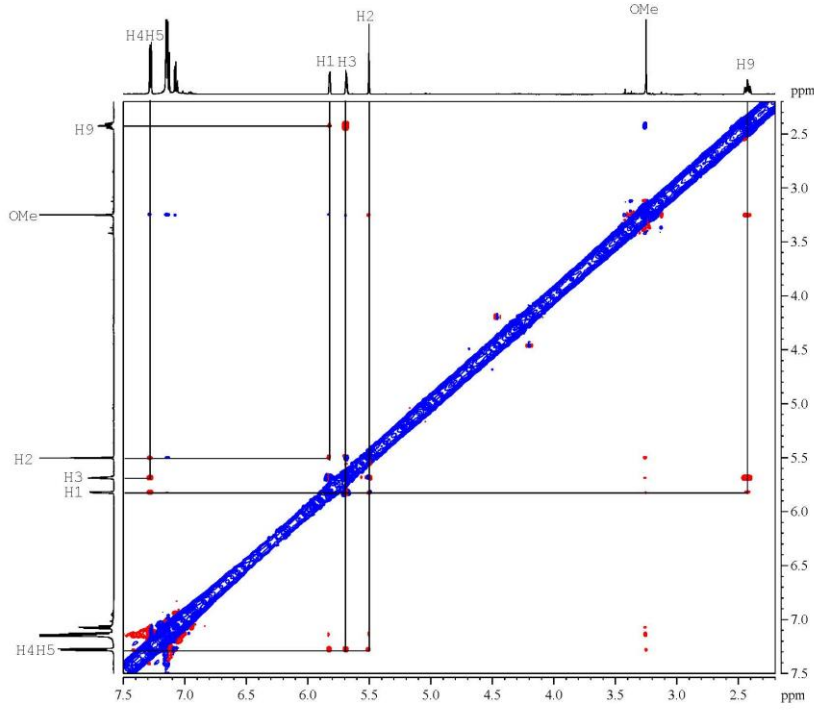

```

Current Data Parameters
NAME 000-129-Copy-Name-9 (408)
EXPNO 1
PROCNO 1
F2 - Acquisition Parameters
Date_ 20151007
Time 17:45
INSTRUM spect
PROBHD 5 mm CPYX 1H
PULPROG zgpg30
TD 65536
SOLVENT cdm
NS 2
DS 2
SWH 7012.200 Hz
F2FREQ 314.457 MHz
AQ 0.111111 sec
RG 64
AQ 64.000 usec
DE 21.00 usec
TE 300.2
SI 0.0000011 sec
SFO 1.0000000 sec
SF 0.4000001 sec
SF 0.0000000 sec
SF 0.0000000 sec
SF 0.0000000 sec
SF 0.0001000 sec
SF 0.0001000 sec
===== CHANNEL f1 =====
NUC1 1H
P1 8.00 usec
PC 15.00 usec
PT 2000.00 usec
PR 4.00 dB
PL1 12.70 dB
PL2 0.0000000 dB
PL3 0.0000000 dB
PL4 0.0000000 dB
===== GRABBER CHANNEL =====
OPRG1 SMOULD100
OPRG2 SMOULD100
PC 40.00 usec
PT 3000.00 usec
F1 - Acquisition Parameters
SI 134
SF 600.135000 MHz
WDW EM
SSB 0 Hz
LB 2
GB 0
PC 1.40
F1 - Processing parameters
SI 134
SF 600.135000 MHz
WDW EM
SSB 0 Hz
LB 2
GB 0
PC 1.40
F2 - Acquisition Parameters
SI 134
SF 600.135000 MHz
WDW EM
SSB 0 Hz
LB 2
GB 0
PC 1.40
F2 - Processing parameters
SI 134
SF 600.135000 MHz
WDW EM
SSB 0 Hz
LB 2
GB 0
PC 1.40

```

# HSQC Spectrum of *E*-131 in C<sub>6</sub>D<sub>6</sub>

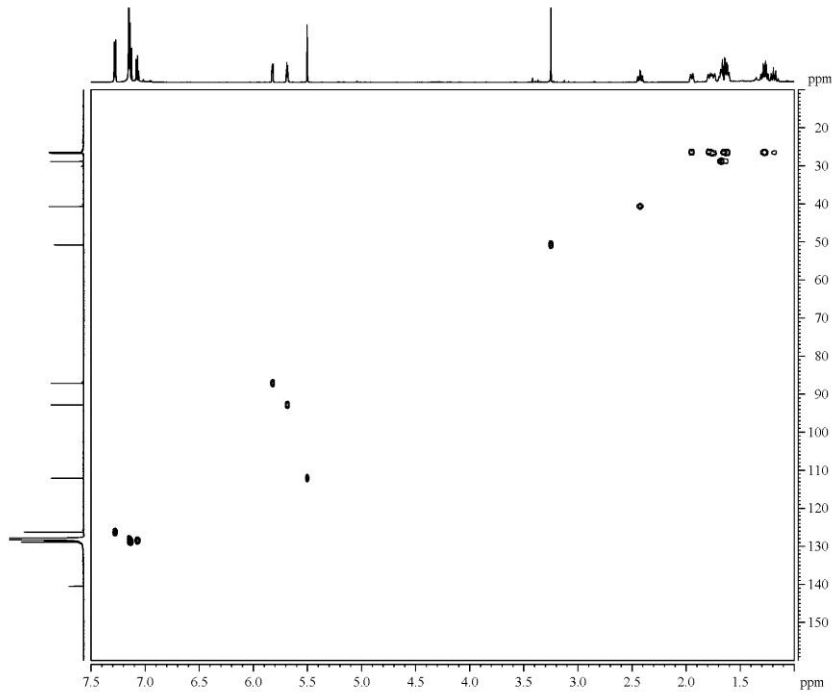

```

Current Data Parameters
NAME 000-129-Copy-Name-9 (408)
EXPNO 1
PROCNO 1
F2 - Acquisition Parameters
Date_ 20151007
Time 17:45
INSTRUM spect
PROBHD 5 mm CPYX 1H
PULPROG zgpg30
TD 65536
SOLVENT cdm
NS 2
DS 2
SWH 7012.200 Hz
F2FREQ 314.457 MHz
AQ 0.111111 sec
RG 64
AQ 64.000 usec
DE 21.00 usec
TE 300.2
SI 0.0000011 sec
SFO 1.0000000 sec
SF 0.4000001 sec
SF 0.0000000 sec
SF 0.0000000 sec
SF 0.0000000 sec
SF 0.0001000 sec
SF 0.0001000 sec
===== CHANNEL f1 =====
NUC1 13C
P1 8.00 usec
PC 15.00 usec
PT 2000.00 usec
PR 4.00 dB
PL1 12.70 dB
PL2 0.0000000 dB
PL3 0.0000000 dB
PL4 0.0000000 dB
===== GRABBER CHANNEL =====
OPRG1 SMOULD100
OPRG2 SMOULD100
PC 40.00 usec
PT 3000.00 usec
F1 - Acquisition Parameters
SI 134
SF 600.135000 MHz
WDW EM
SSB 0 Hz
LB 2
GB 0
PC 1.40
F1 - Processing parameters
SI 134
SF 600.135000 MHz
WDW EM
SSB 0 Hz
LB 2
GB 0
PC 1.40
F2 - Acquisition Parameters
SI 134
SF 600.135000 MHz
WDW EM
SSB 0 Hz
LB 2
GB 0
PC 1.40
F2 - Processing parameters
SI 134
SF 600.135000 MHz
WDW EM
SSB 0 Hz
LB 2
GB 0
PC 1.40

```

### <sup>1</sup>H NMR Spectrum of **Z-13m** in CDCl<sub>3</sub>

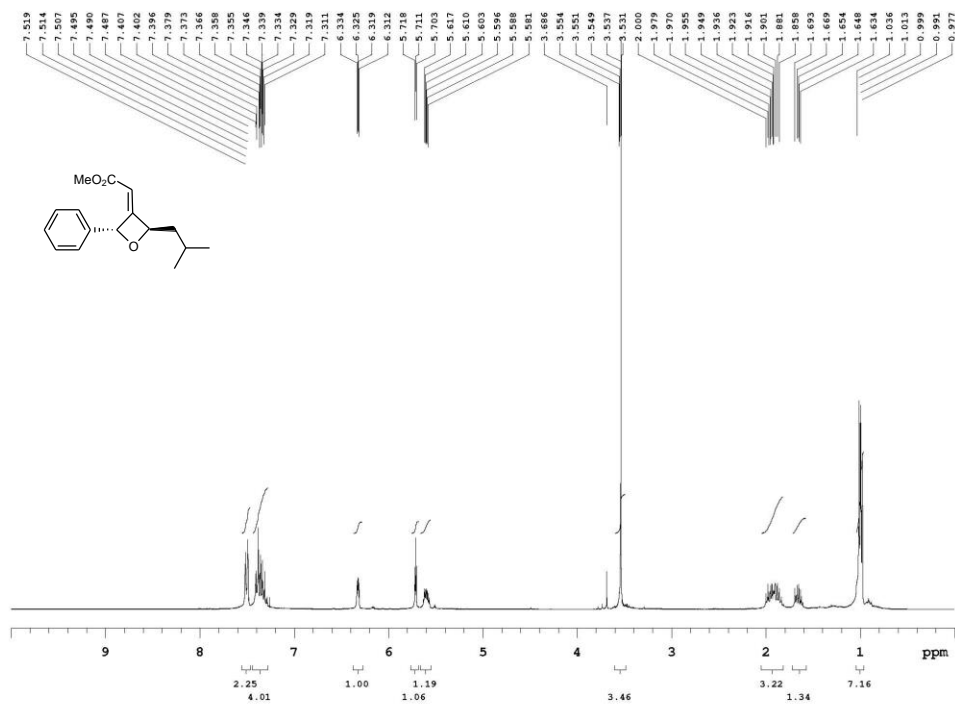

### <sup>13</sup>C NMR Spectrum of **Z-13m** in CDCl<sub>3</sub>

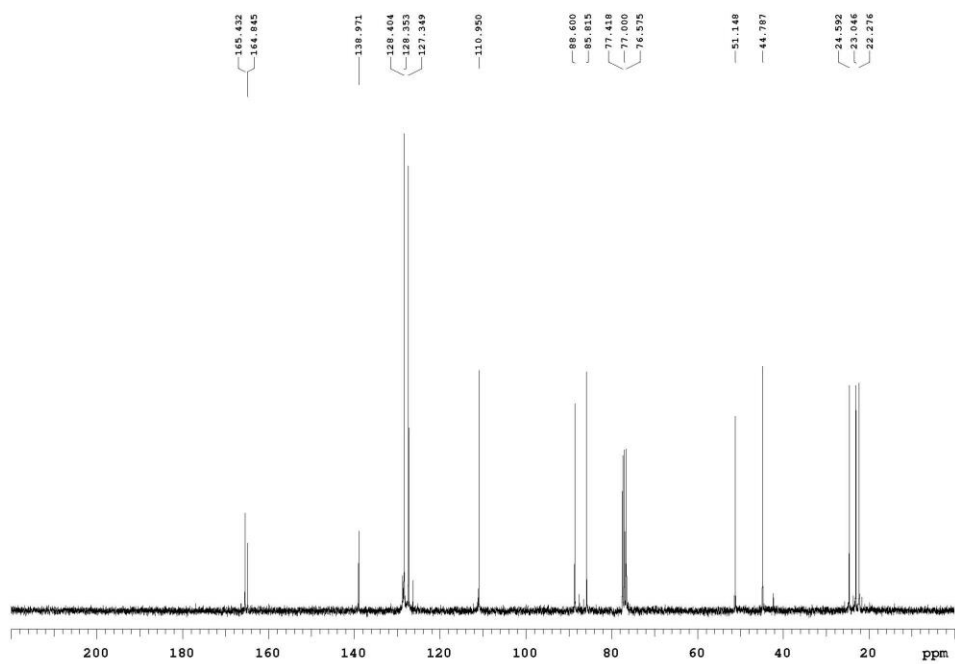



### $^1\text{H}$ NMR Spectrum of *E*-13m in $\text{CDCl}_3$

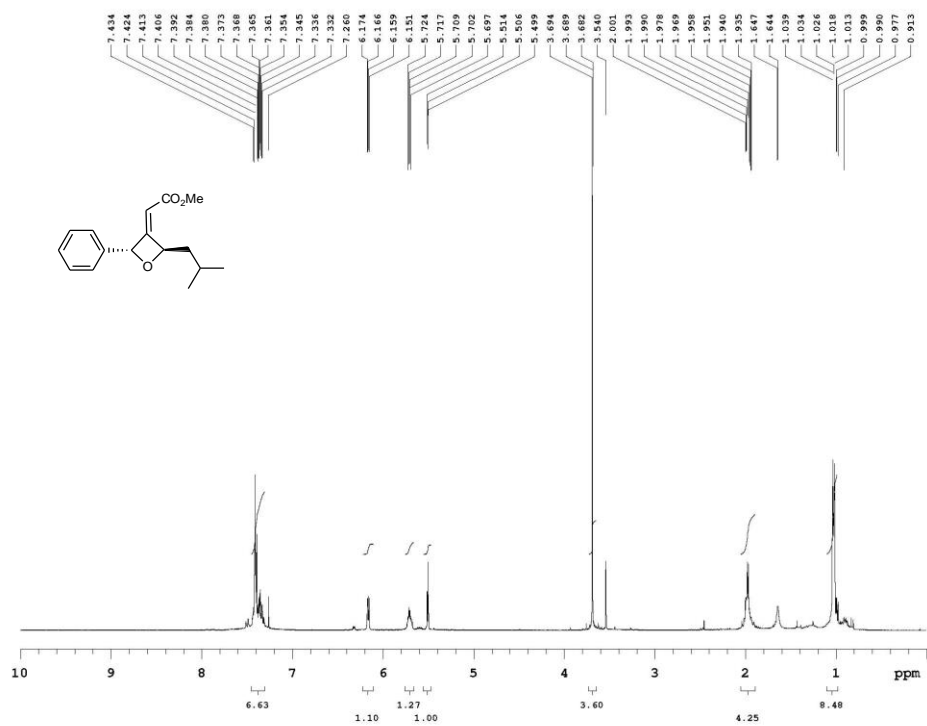

### $^{13}\text{C}$ NMR Spectrum of *E*-13m in $\text{CDCl}_3$

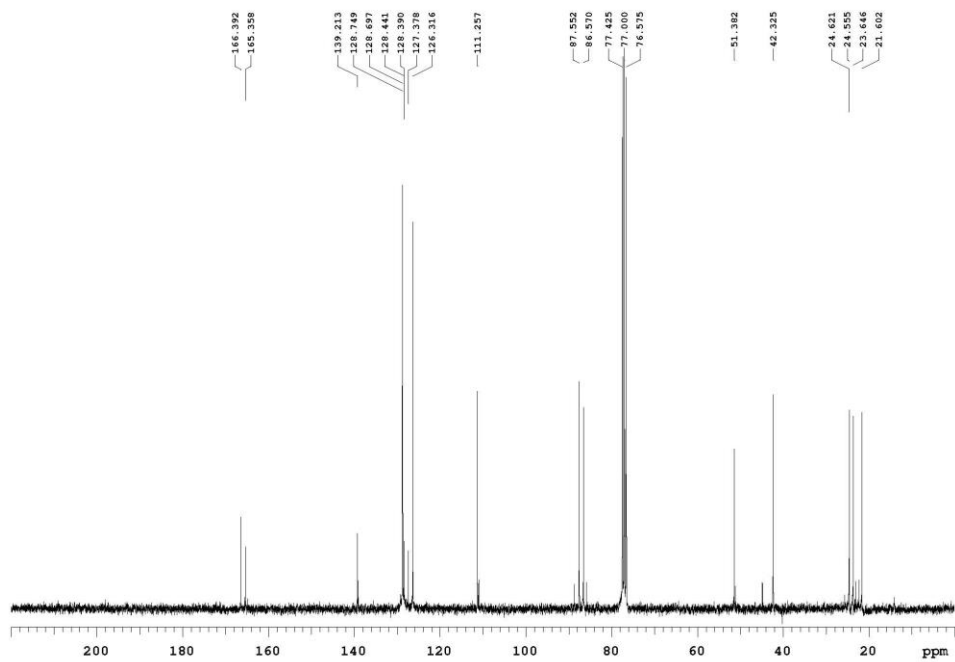

### $^1\text{H}$ NMR Spectrum of **Z-13n** in $\text{CDCl}_3$

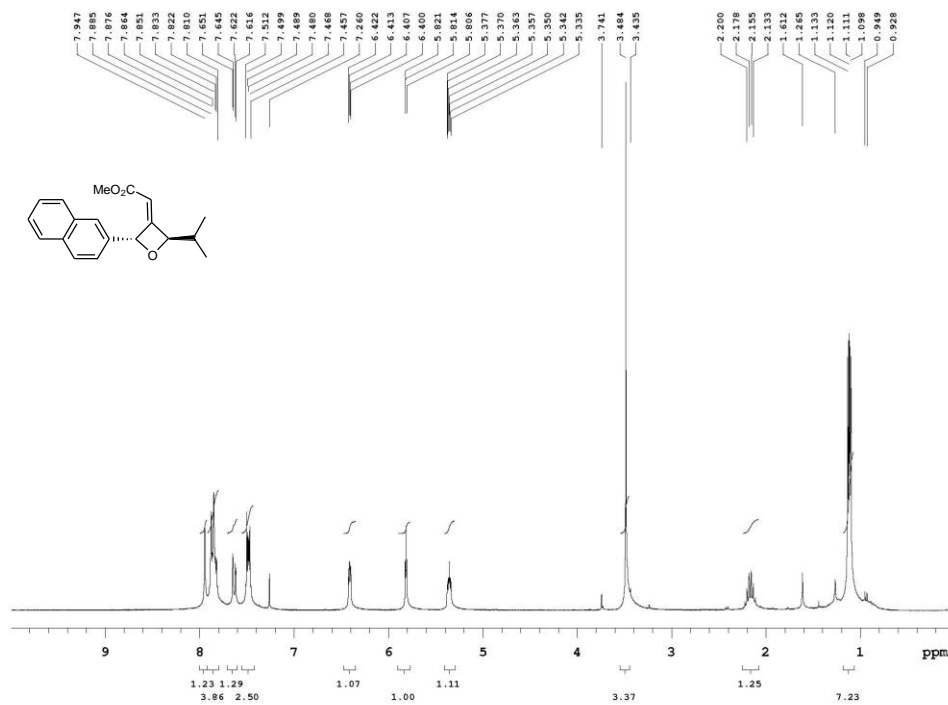

### $^{13}\text{C}$ NMR Spectrum of **Z-13n** in $\text{CDCl}_3$

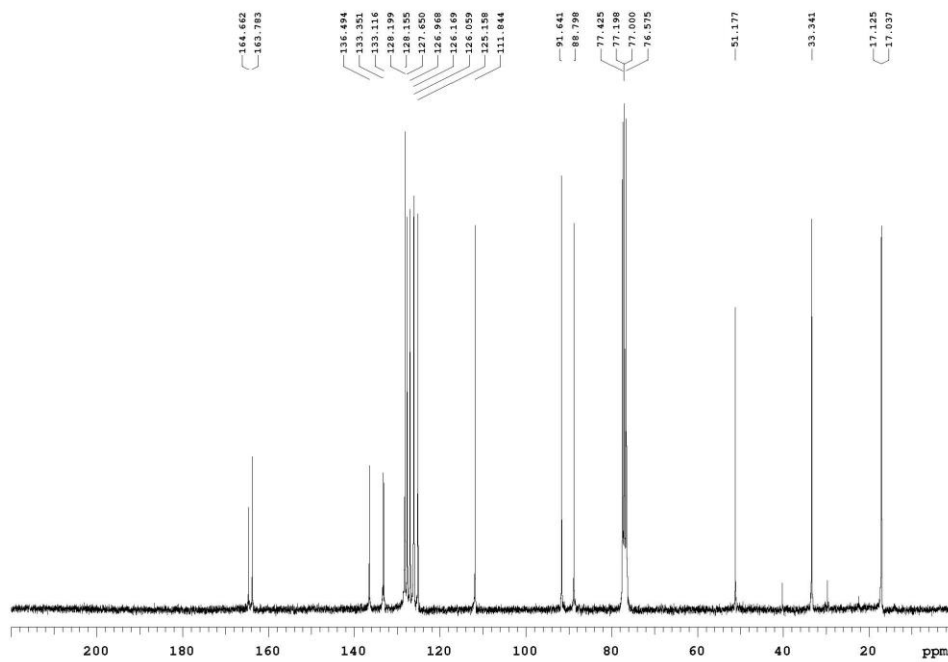

<sup>1</sup>H NMR Spectrum of **Z-13n** in C<sub>6</sub>D<sub>6</sub>

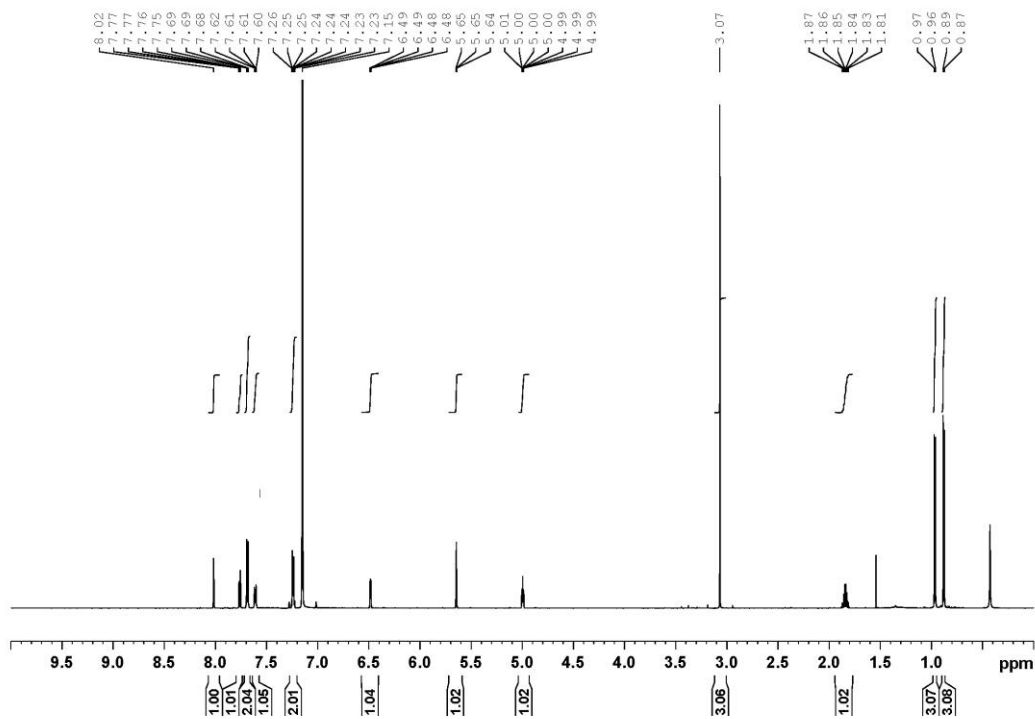

<sup>13</sup>C NMR Spectrum of **Z-13n** in C<sub>6</sub>D<sub>6</sub>

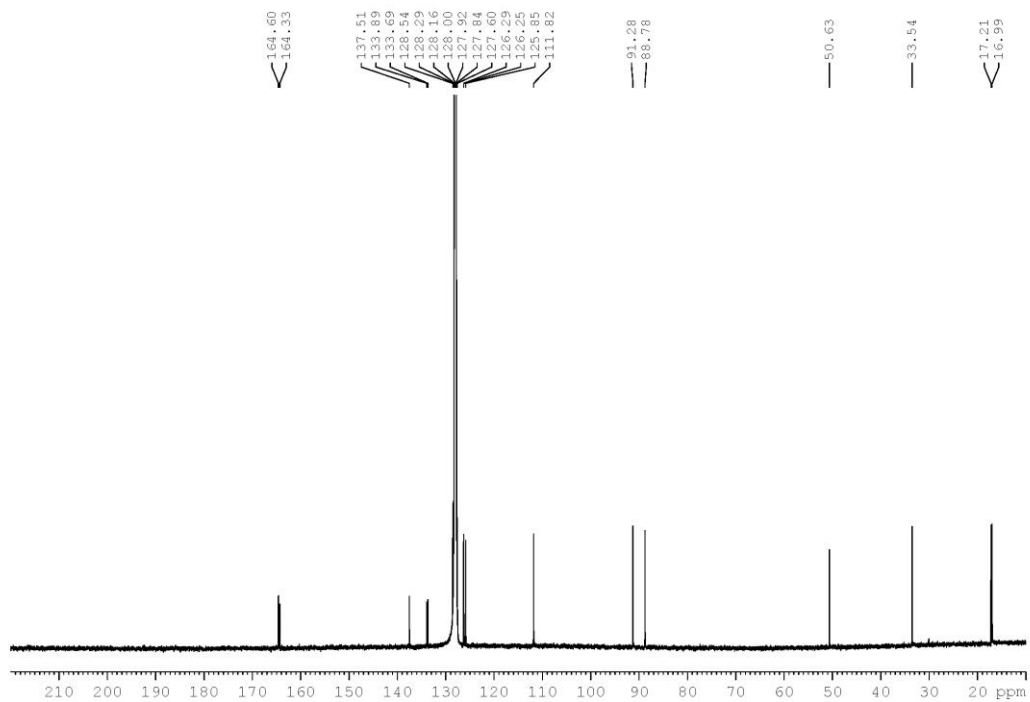





### $^1\text{H}$ NMR Spectrum of *E*-13n in $\text{CDCl}_3$

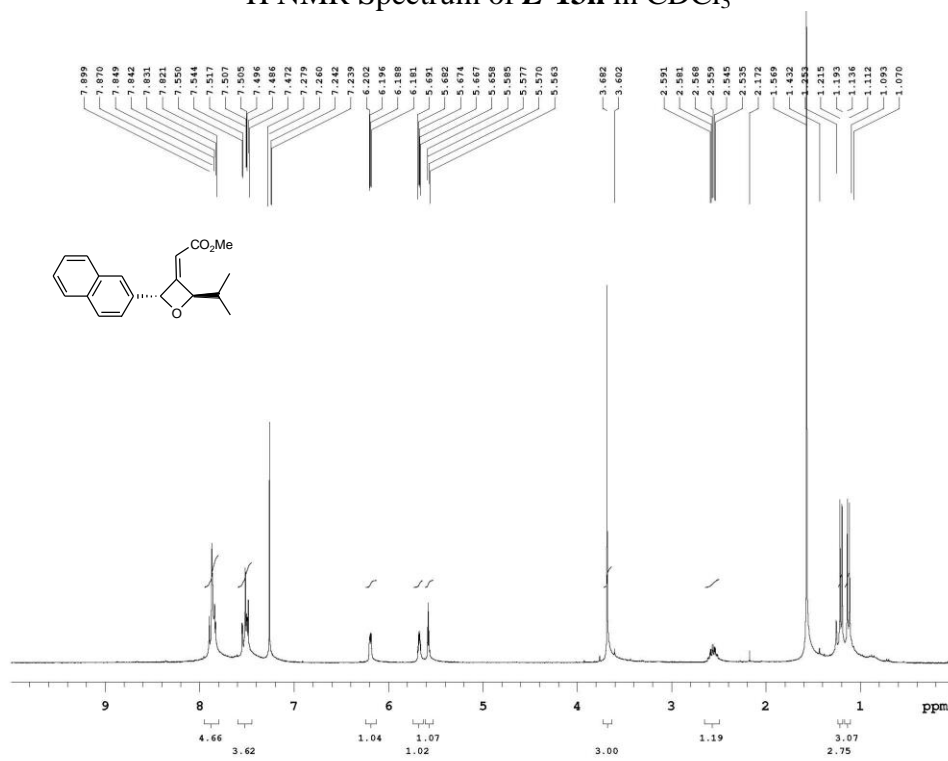

### $^{13}\text{C}$ NMR Spectrum of *E*-13n in $\text{CDCl}_3$

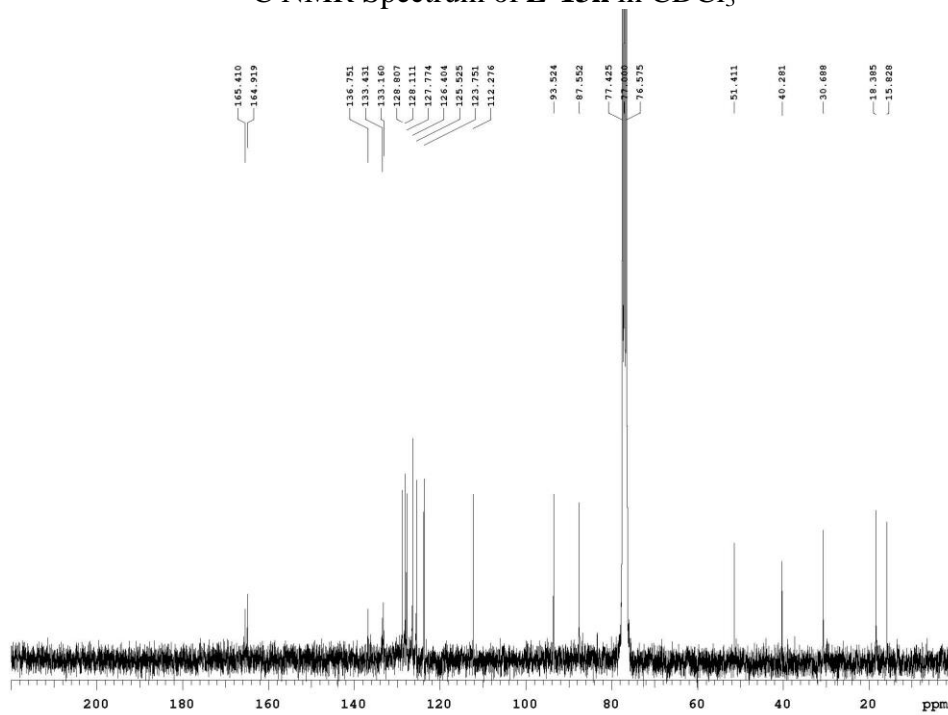

$^1\text{H}$  NMR Spectrum of *E*-13n in  $\text{C}_6\text{D}_6$

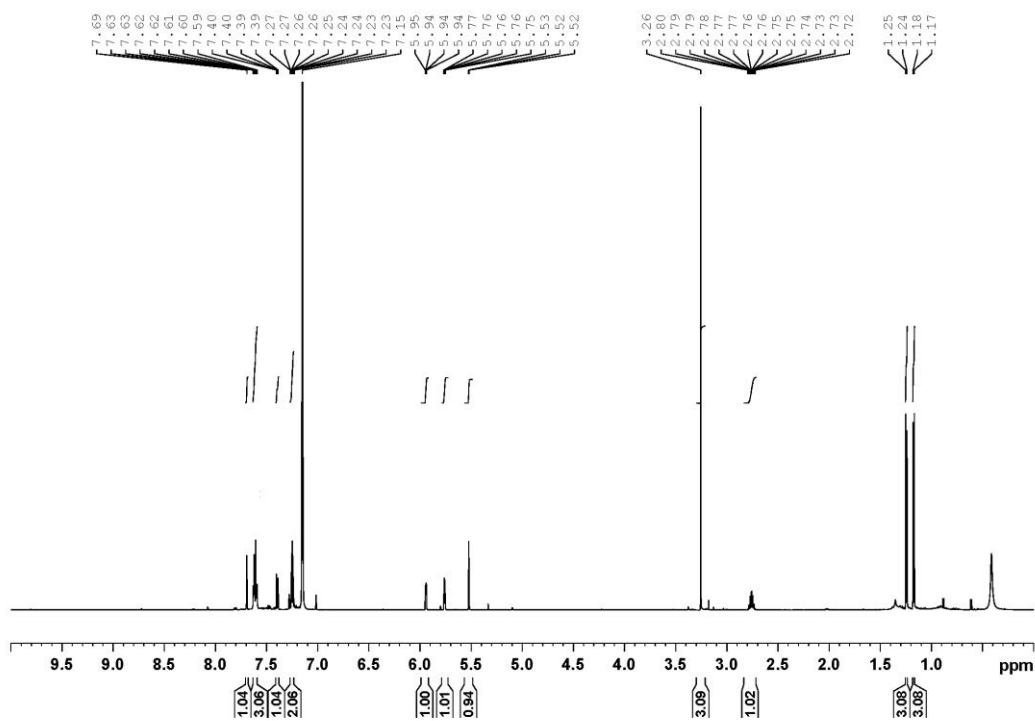

$^{13}\text{C}$  NMR Spectrum of *E*-13n in  $\text{C}_6\text{D}_6$

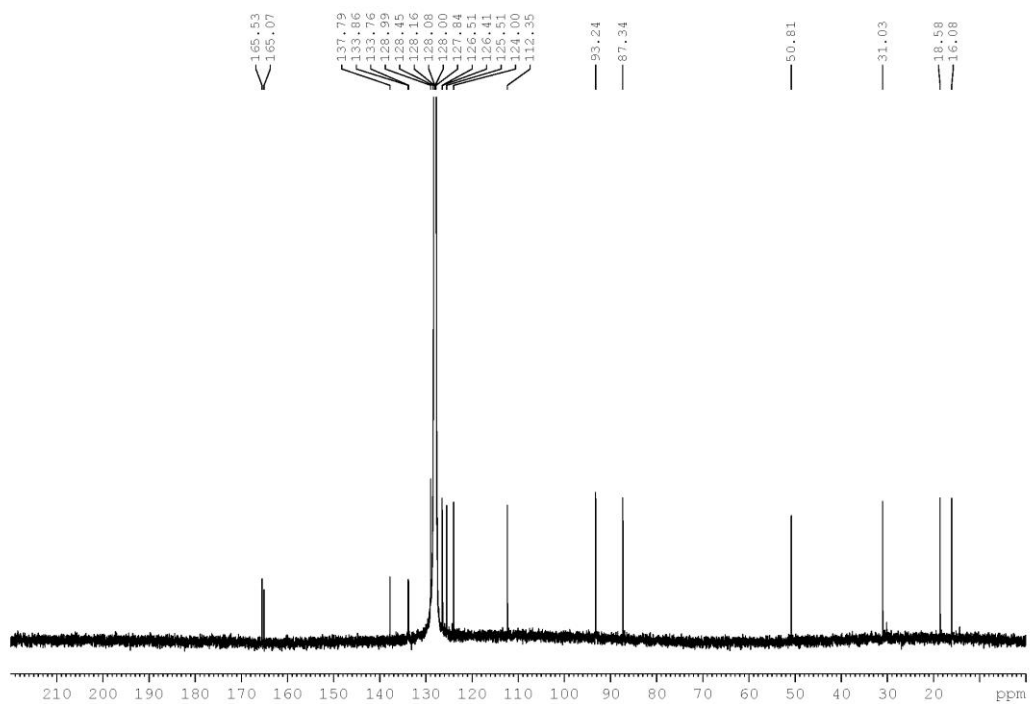



# <sup>1</sup>H NMR Spectrum of 17 in C<sub>6</sub>D<sub>6</sub>

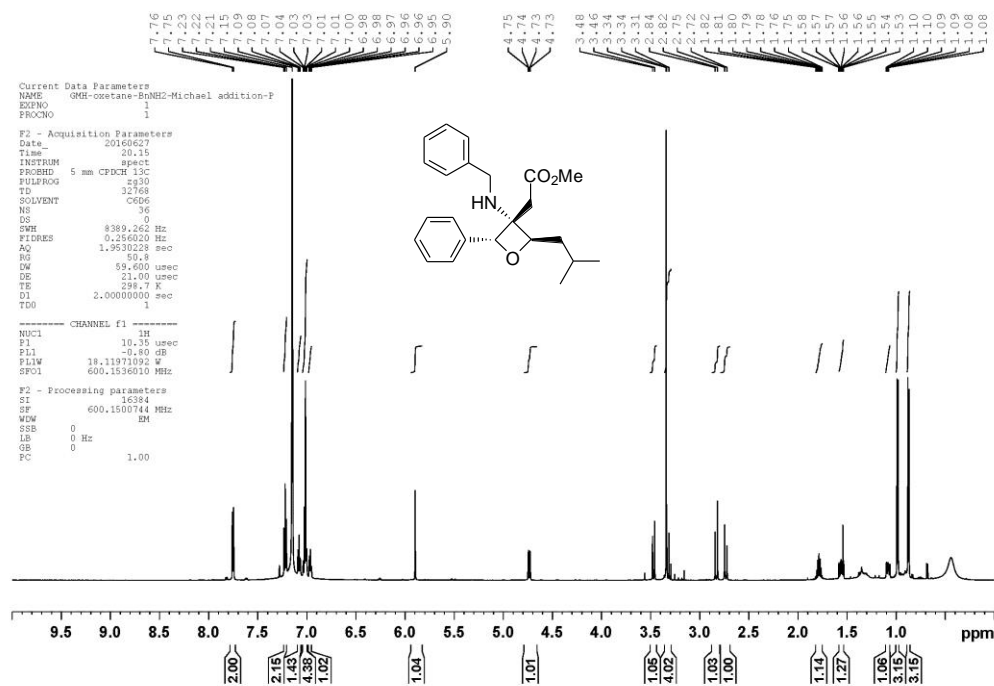

# <sup>13</sup>C NMR Spectrum of 17 in C<sub>6</sub>D<sub>6</sub>

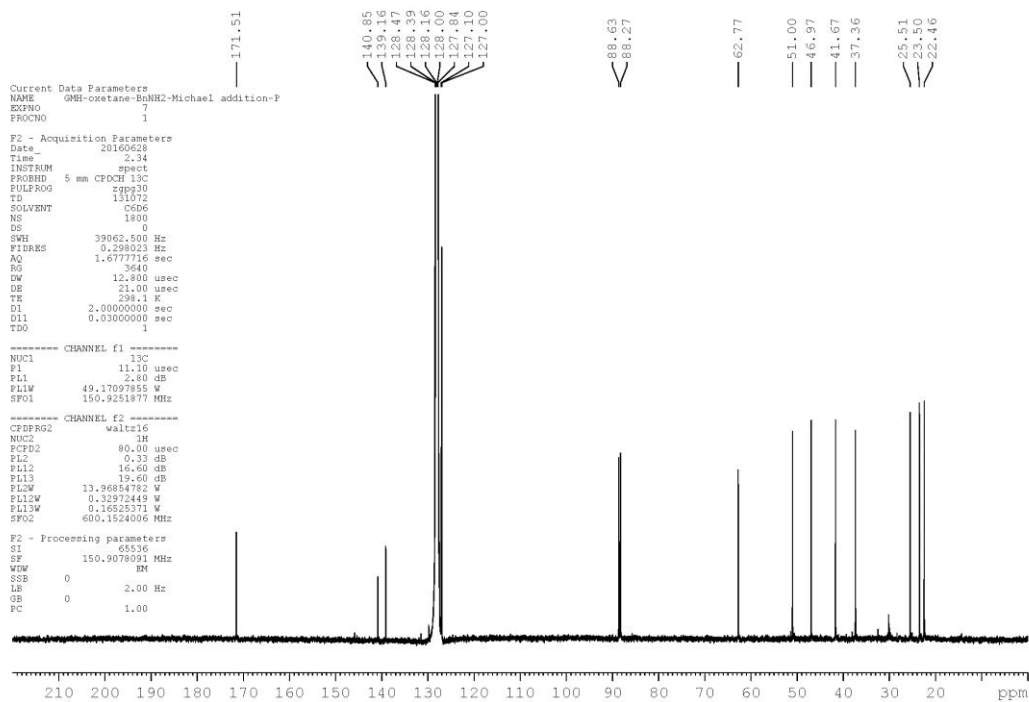

# NOESY Spectrum of 17 in C<sub>6</sub>D<sub>6</sub>

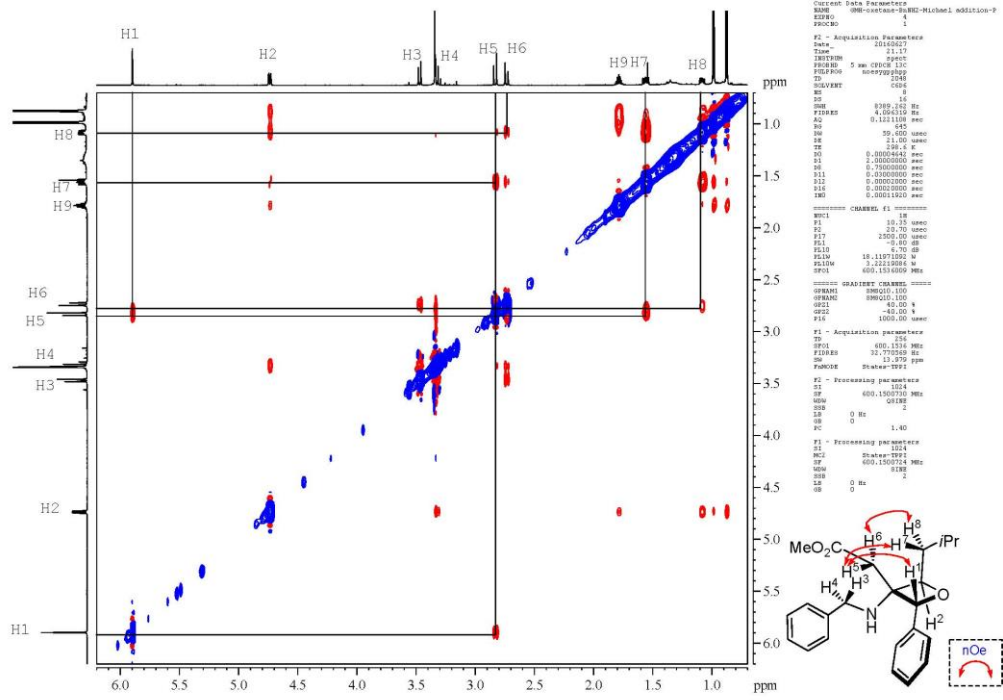

# HSQC Spectrum of 17 in C<sub>6</sub>D<sub>6</sub>

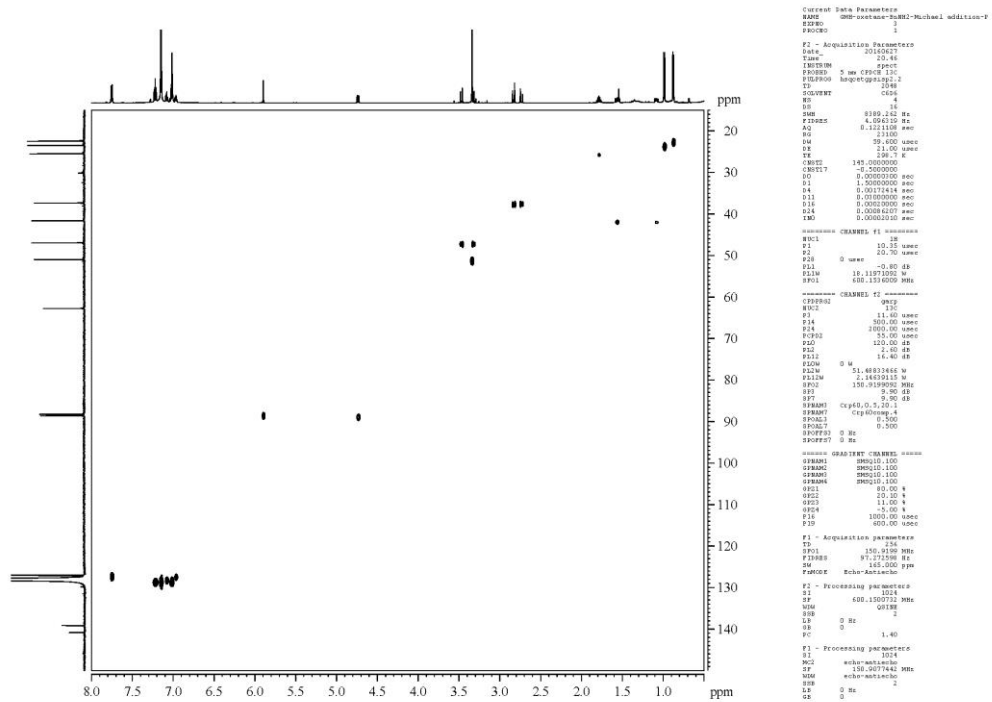

# <sup>1</sup>H NMR Spectrum of **18** in C<sub>6</sub>D<sub>6</sub>

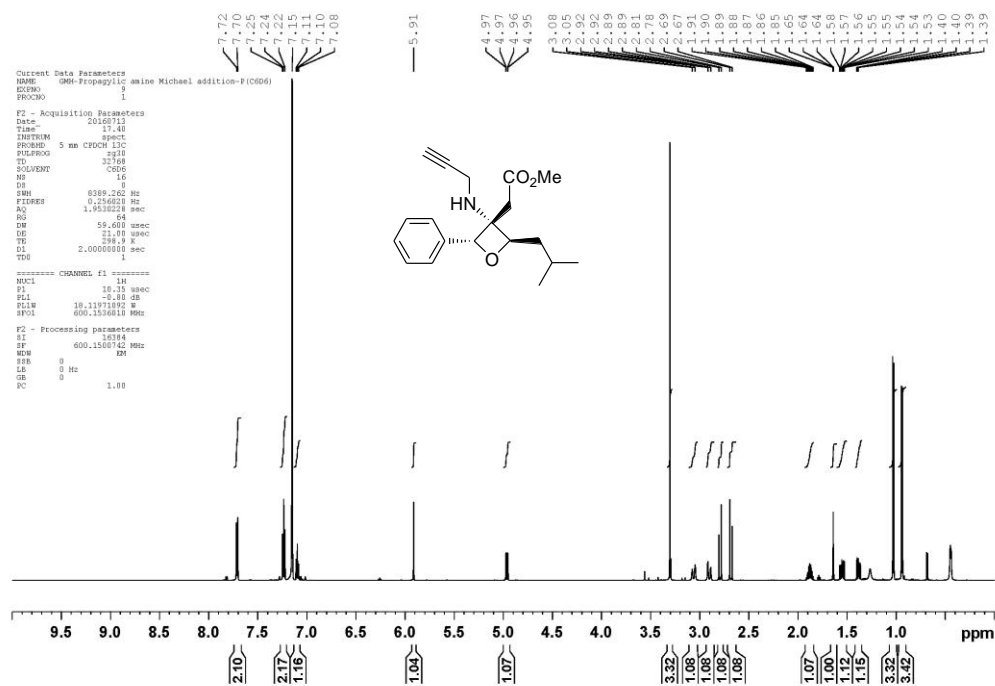

# <sup>13</sup>C NMR Spectrum of **18** in C<sub>6</sub>D<sub>6</sub>

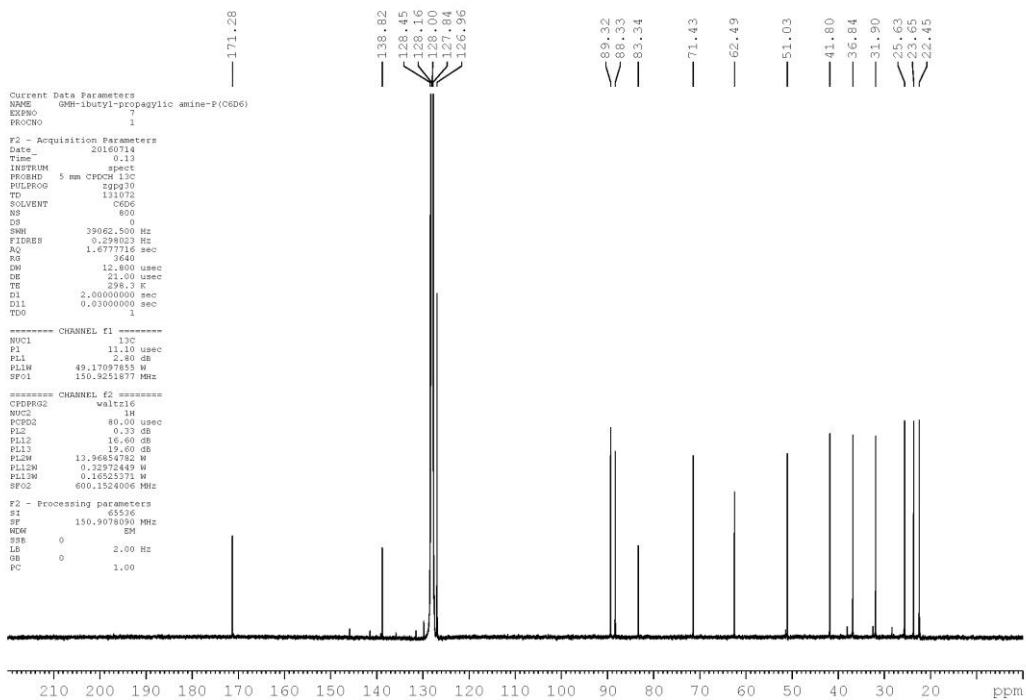





## V. X-Ray Structure and Crystallographic Data

**Single crystal X-ray structure (ORTEP) of oxetane 25a.** The crystals were grown from hexanes: EtOAc (4:1), using a slow evaporation method (ellipsoids are set at 50% probability). X-ray crystallographic data have been deposited in the Cambridge Crystallographic Data Centre database (<http://www.ccdc.cam.ac.uk/>) under accession code CCDC 1437743.

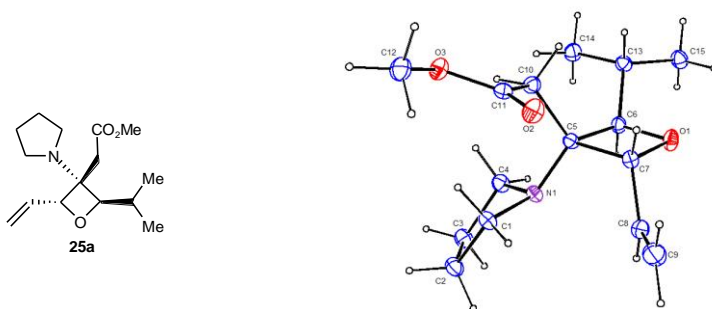

**Table 1. Crystal data and structure refinement for i15955.**

|                                   |                                                  |                 |
|-----------------------------------|--------------------------------------------------|-----------------|
| Identification code               | i15955                                           |                 |
| Empirical formula                 | C <sub>15</sub> H <sub>25</sub> N O <sub>3</sub> |                 |
| Formula weight                    | 267.36                                           |                 |
| Temperature                       | 100.0(2) K                                       |                 |
| Wavelength                        | 0.71073 Å                                        |                 |
| Crystal system                    | Monoclinic                                       |                 |
| Space group                       | P 2 <sub>1</sub> /n                              |                 |
| Unit cell dimensions              | a = 11.3879(3) Å                                 | α = 90°.        |
|                                   | b = 10.6012(3) Å                                 | β = 98.506(2)°. |
|                                   | c = 12.1055(3) Å                                 | γ = 90°.        |
| Volume                            | 1445.37(7) Å <sup>3</sup>                        |                 |
| Z                                 | 4                                                |                 |
| Density (calculated)              | 1.229 Mg/m <sup>3</sup>                          |                 |
| Absorption coefficient            | 0.084 mm <sup>-1</sup>                           |                 |
| F(000)                            | 584                                              |                 |
| Crystal size                      | 0.320 x 0.180 x 0.120 mm <sup>3</sup>            |                 |
| Theta range for data collection   | 2.292 to 27.101°.                                |                 |
| Index ranges                      | -14 ≤ h ≤ 14, -13 ≤ k ≤ 13, -15 ≤ l ≤ 15         |                 |
| Reflections collected             | 55506                                            |                 |
| Independent reflections           | 3195 [R(int) = 0.0498]                           |                 |
| Completeness to theta = 25.000°   | 100.0 %                                          |                 |
| Absorption correction             | Semi-empirical from equivalents                  |                 |
| Max. and min. transmission        | 0.9705 and 0.9044                                |                 |
| Refinement method                 | Full-matrix least-squares on F <sup>2</sup>      |                 |
| Data / restraints / parameters    | 3195 / 0 / 176                                   |                 |
| Goodness-of-fit on F <sup>2</sup> | 1.035                                            |                 |

|                                      |                                    |
|--------------------------------------|------------------------------------|
| Final R indices [ $I > 2\sigma(I)$ ] | R1 = 0.0347, wR2 = 0.0777          |
| R indices (all data)                 | R1 = 0.0495, wR2 = 0.0877          |
| Extinction coefficient               | 0.0029(7)                          |
| Largest diff. peak and hole          | 0.309 and -0.181 e.Å <sup>-3</sup> |

**Table 2. Atomic coordinates (  $\times 10^4$ ) and equivalent isotropic displacement parameters ( $\text{Å}^2 \times 10^3$ ) for i15955. U(eq) is defined as one third of the trace of the orthogonalized  $U_{ij}$  tensor.**

|       | x        | y       | z       | U(eq) |
|-------|----------|---------|---------|-------|
| O(1)  | 7935(1)  | 5323(1) | 3980(1) | 22(1) |
| O(2)  | 5524(1)  | 6117(1) | 6245(1) | 23(1) |
| O(3)  | 5433(1)  | 4495(1) | 7417(1) | 21(1) |
| N(1)  | 8684(1)  | 5050(1) | 6606(1) | 16(1) |
| C(1)  | 8351(1)  | 5730(1) | 7566(1) | 19(1) |
| C(2)  | 9472(1)  | 5654(1) | 8434(1) | 22(1) |
| C(3)  | 10085(1) | 4429(1) | 8136(1) | 23(1) |
| C(4)  | 9293(1)  | 3919(1) | 7103(1) | 20(1) |
| C(5)  | 7736(1)  | 4829(1) | 5673(1) | 15(1) |
| C(6)  | 8241(1)  | 4213(1) | 4673(1) | 16(1) |
| C(7)  | 7477(1)  | 5988(1) | 4879(1) | 16(1) |
| C(8)  | 8130(1)  | 7179(1) | 5185(1) | 20(1) |
| C(9)  | 7616(1)  | 8284(1) | 5218(1) | 29(1) |
| C(10) | 6613(1)  | 4207(1) | 6001(1) | 18(1) |
| C(11) | 5821(1)  | 5068(1) | 6550(1) | 17(1) |
| C(12) | 4619(1)  | 5226(1) | 7971(1) | 24(1) |
| C(13) | 7720(1)  | 3017(1) | 4117(1) | 18(1) |
| C(14) | 8058(1)  | 1873(1) | 4861(1) | 21(1) |
| C(15) | 8156(1)  | 2841(1) | 2994(1) | 22(1) |
